# Supplementary material for: Machine Learning approaches in the evaluation of pXRF data in provenance studies of transport amphorae
Source: Research Square preprint supplement (doi:10.21203/rs.3.rs-8310173/v1), 2025-12-22
Supplement: Supplementary file 1 [file bc0e0b5b604ffa37f49bdc50.xlsx]

## Sheet: Training Categories
Category		Nsamples	Nmeas	Supposed Origin
0	KOS-A	24	73	Southcentral Kos
1	KOS-B	4	17	Cenral Kos
2	KOS-C	3	19	Central Kos
3	KOS-D	3	17	Northeast Kos
4	KOS-D2	20	41	Northeast Kos, amphora workshop
5	KOS-E	2	17	unknown
6	KOS-F	2	17	unknown
7	RHO-A	30	30	North Rhodes
8	RHO-B	8	22	Rhodian Peraia/Knidos
9	RHO-C	4	19	unknown
10	RHO-D	3	19	North Rhodes
11	RHO-E	5	16	Asia Minor Coast
12	RHO-F	2	18	unknown
13	KNI-A	4	21	Rhodian Peraia/Knidos
14	CHI-A	3	14	Chios
15	EPH-A	3	14	Ephesos
16	LEM-A	3	13	Lemnos
17	NIK-A	4	17	Nikandros', Aegean, unknown
18	THA-A	2	11	Thassos
19	SAM-A	7	7	Samos
20	AEG-A	5	20	Aegean, unknown
21	AEG-B	2	9	Aegean, unknown
22	AEG-C	2	9	Aegean, unknown
23	SIC-A	5	20	Western Mediterranean
24	PAP-A	5	20	Paphos
25	PAP-B	4	16	Paphos
26	PAP-C	3	14	Paphos
27	KOU-A	6	20	Kourion
28	KOU-B	4	17	Kourion
29	KOU-C	4	19	Kourion
30	KOU-D	5	22	Kourion
31	KOU-E	3	12	Kourion
32	RBW-A	4	17	Cyprus, unknown

## Sheet: Training Data
SAMPLE	Zr	Sr	U	Rb	Th	Pb	Zn	Cu	Ni	Fe	Mn	Cr	V	Ti	Ca	K	CLUST
KOS-A001a	197.7	291.9	7.4	98.1	22.2	36.9	68.6	25.8	184.7	29838	289.5	230.8	74.1	2688	38161	15346	0
KOS-A001b	211	321.5	12.4	107.2	20.3	44.2	73.2	37.2	206.8	31370	365.2	271	80.1	3352	52638	19698	0
KOS-A001c	211.5	324.4	10	105.8	22.1	42.2	80.3	33.9	201.7	31198	328.6	237.7	92.3	3110	57278	19704	0
KOS-A001d	212.3	319.9	11.1	104.4	25.2	38.9	74.4	23	199.3	31403	378.9	223.2	68.6	3211	56525	19773	0
KOS-A001e	216.7	323	11.6	105.6	22.9	39.9	82.2	25.9	224.6	32819	377.8	265.2	91.3	3361	46418	20761	0
KOS-A002a	227.2	347.4	16	139.9	27.1	46.8	87.4	52.3	195.6	35664	413.2	230.7	97.8	3308	65865	25705	0
KOS-A002b	214.3	335.6	11.2	133.2	25.6	40.1	80.6	41.8	182.5	32055	360.5	197.9	72.9	2899	58519	22686	0
KOS-A002c	229.5	348.2	21.3	141.2	26	47.6	89.5	44.8	207.6	34961	386.5	226.8	86	3534	70568	28386	0
KOS-A003a	231.9	385.4	15.7	144.9	28.2	46.4	85.2	32.1	175.5	38003	370.1	253.2	78.6	3380	65673	24940	0
KOS-A003b	235.1	380.7	14.9	143.8	25.7	48.6	83.5	25.4	180.4	37275	419.5	198.2	90.4	3554	69726	26404	0
KOS-A003c	230.7	376.2	16.4	145.6	27.7	48	80.2	27.6	199.1	36302	366.3	178.4	80.4	2699	50476	20182	0
KOS-A004a	228.2	395.1	14.4	133.3	21.6	27.1	79.4	35.7	256.5	37196	444.1	281.8	77.1	2881	74611	21610	0
KOS-A004b	233.5	394.6	12.4	136	23.1	42.8	81.4	23.2	252.9	36930	437.8	265.2	86	3017	76707	23123	0
KOS-A004c	227.5	389.6	14.8	131.3	23.9	30.6	69.6	35.2	246.9	35741	495.8	278	75.9	2905	74723	22102	0
KOS-A005a	249	386.1	17.4	146.1	26.2	46.6	87.3	36.4	175.8	36531	327.4	234.7	109.8	3575	60153	26525	0
KOS-A005b	238.4	381.2	15.7	143.2	23.8	43.7	85.3	21.8	189.2	35506	331.9	235.8	91.1	3399	58210	25416	0
KOS-A006a	222.9	421.8	14.9	126.1	22.6	24.6	78.9	36.9	193.2	32841	376	242.1	72.1	2727	63629	19989	0
KOS-A006b	230.8	425.7	16	132	25.2	28	81.8	24.2	189.8	33758	313.9	232	74.5	2966	65357	21500	0
KOS-A006c	223.8	420.2	16.9	123.2	23.4	31.7	71.6	26.7	184.5	31802	351.6	184.8	71.6	2727	62220	19763	0
KOS-A007a	251.9	377.4	16	141.3	25.1	49.9	83	37.3	207.3	35005	368.9	290.4	91.4	3648	61793	24597	0
KOS-A007b	250.1	369.9	15.7	144	25.6	45.1	80.4	30	202.9	34968	389.8	271.1	96.5	3673	65064	26122	0
KOS-A007c	252.6	367.7	17.8	139.8	24	48.7	81.6	35.4	187.9	34955	386.4	233.2	81.6	3396	59914	23717	0
KOS-A007d	256.2	376.2	18.5	143.2	25.3	47.8	87.7	28.4	199.1	35203	360.4	278.6	90.5	3745	64678	25832	0
KOS-A007e	269.6	394.6	18.5	147.7	25.9	50.7	82.6	27.4	209.4	36440	399.5	206.6	61.1	2824	52215	19874	0
KOS-A007f	251.3	377.3	14.8	144.9	25.6	60	82.5	27.6	182.6	36301	304.7	275.8	100.2	3547	64266	25329	0
KOS-A008a	214.2	372.5	14.3	129.4	25.5	41.8	75.9	35.6	174.4	31902	288.8	196.1	96.7	2945	59007	21207	0
KOS-A008b	218.8	377.5	20.3	130	23.4	41.5	80.7	33.7	160.7	32598	335.2	184.9	90.7	3018	60672	22520	0
KOS-A008c	224.2	387.9	20.5	134	22.8	44.5	76.1	16.7	161.2	33888	304.1	194	78.2	3158	62522	23574	0
KOS-A009a	248	413.1	17.1	133.4	25.4	52.4	71.1	29.1	169.4	29166	316.2	213.4	74.8	3034	64916	21729	0
KOS-A009b	252.8	422.3	15.6	132.2	21.8	58.5	79.4	25.1	170.5	30152	314.2	204.3	76.5	2917	62487	21307	0
KOS-A009c	252	423.2	16.2	125.5	22.7	58.6	73.2	26.4	158.8	30868	352.6	218.1	82.6	3200	69228	23708	0
KOS-A010a	239.8	356.9	14.8	137.1	26.3	40.4	77	29.5	169.6	31007	369.9	186.7	81.7	2833	53456	20908	0
KOS-A010b	254.8	368.8	19	152	22.9	48.8	93	34	162	37476	390.6	288.2	119.5	4430	34907	26262	0
KOS-A010c	233.1	349.9	20.5	137.3	23.3	41.7	73.8	22.6	140.5	31390	310.6	159.1	67	2602	51647	19595	0
KOS-A010d	247	361.8	18.2	140.5	23.7	45.7	76.1	23.8	159.9	31733	380.9	199.2	72.7	3210	59374	22688	0
KOS-A011a	229.8	321.2	14.4	147.9	27	52.8	112.6	45.3	208.3	35032	472.9	282.8	92	3790	37049	24869	0
KOS-A011b	238.8	309	16.9	152.1	29.2	47.8	90	26.9	180.4	33724	471.7	157	76	2840	52020	21622	0
KOS-A011c	245.1	312.8	19.8	148.5	27.3	48.8	90.5	36.7	184.9	33452	555.4	198.2	86.4	3032	60187	22871	0
KOS-A012a	249.5	342	15.1	135.7	24.3	39	75.3	31.8	163.1	30853	274.3	253.1	98.6	3435	59850	22717	0
KOS-A012b	241.7	332.6	20.3	130.8	24.3	41.7	72.9	28.2	148.7	31010	228.8	216.6	91.1	3355	60380	22803	0
KOS-A012c	256.7	353.9	19	138.1	22.2	42	78.3	20.7	154.1	31898	234.5	230.7	93.9	3700	65640	25028	0
KOS-A013a	244.4	378.4	20.4	145.9	27.8	41.2	89.7	43	200.4	36014	360.9	267.3	100.1	3376	60067	25614	0
KOS-A013b	237.7	352.3	21.5	138.7	26.4	40.4	82.8	18.7	184	33616	316.7	172	81.9	2935	51978	22172	0
KOS-A013c	248	375.8	23.1	146.5	28.3	35	94.7	20.8	168	37442	345	193.1	77.2	3128	52772	23470	0
KOS-A014a	234.8	416.7	13.6	131.5	22.1	44.5	76.1	24.7	182.6	32968	304.6	240.5	82.3	2939	91388	23275	0
KOS-A014b	230.2	407.9	20.1	131.7	24.2	38.3	80.1	25.3	177.7	35030	336.6	225.4	71.7	2987	74162	21483	0
KOS-A014c	230.1	403.6	17.4	129.8	23.1	40.8	82.6	22.2	214.3	31977	331.7	194.9	87.2	2883	90972	22508	0
KOS-A015a	238.6	400.6	13.8	80.8	26.1	38.5	80.5	35.4	208.9	33237	349.2	238.9	76.7	2914	77286	16119	0
KOS-A015b	233.8	412.7	17.5	82.8	22.8	42.5	80.4	25.2	190.7	34331	336.1	260.7	68.6	3198	88172	17695	0
KOS-A016a	269.7	417.8	13.7	105.5	24.4	32	81.5	25	201.5	33506	356.1	338.2	75.5	2976	87024	17931	0
KOS-A016b	240	421.3	16.3	109.8	21.6	43.5	70.6	28.2	185	33252	380.6	222.5	77.7	2901	78572	16972	0
KOS-A016c	253.5	413.3	17.3	106.3	24.1	33.7	82.4	32.8	193.5	33226	348.2	241.7	62.3	2774	82471	16439	0
KOS-A017a	226.5	370.9	12.5	91.6	23.6	35.1	73.7	31.7	204.7	29352	324.5	203.8	61.4	2477	55291	12839	0
KOS-A018a	224	359.9	14.9	127.3	25.2	36.4	82	32.7	217.9	32399	623.2	263	82.6	2942	88101	19608	0
KOS-A018b	223	356.6	13.9	124.9	24.5	43.3	75.4	29.3	219.8	30221	645.7	219.8	65.6	2752	93625	19794	0
KOS-A018c	218.3	350.9	14.4	118.3	21.9	40.3	72	27	201.9	30794	613.4	206.9	68.4	2547	77364	17844	0
KOS-A019a	211.2	361.3	14.3	117.8	23.1	40.3	77.4	42.8	202.7	30549	329.4	273.2	85.5	3102	78716	24577	0
KOS-A019b	211.3	381.4	14.7	119.5	21.2	38.8	75.5	29.1	180.8	31482	345.1	243	98.4	3335	88798	25673	0
KOS-A019c	209.3	361.7	12.2	117.3	23.6	40.8	71.9	30.5	195.7	30232	363.2	227.3	80.2	3161	78995	24560	0
KOS-A020a	240.8	402.9	23.1	133.9	23.1	27.1	77.3	40.1	225	37680	409	351.3	86.4	3504	53305	22852	0
KOS-A020b	217.5	375.5	15.3	102.4	23.4	28.6	74.1	25.5	191.7	29024	360.7	164	62	2087	61824	14659	0
KOS-A021a	236.3	352.4	14.4	140.2	25.1	47.1	85.4	36.3	164.8	33220	367.5	225.9	72.9	2945	50278	22145	0
KOS-A021b	238.1	367.4	19.7	142.3	25.7	46.6	79.6	26.4	163.1	34717	367.3	206.8	82.8	3013	52870	21990	0
KOS-A021c	246	360.4	17.4	148.6	27.8	45.6	87.3	36.8	174.6	34623	363.6	185	72.8	3233	53360	22841	0
KOS-A022a	241	391.7	15.8	108.4	24.4	36.4	89.8	37.9	211.9	34851	403.8	251.8	104.8	3257	84685	20426	0
KOS-A022b	234.6	387.6	17.8	113.4	22.2	44.5	77.2	30.2	221.4	33621	345.5	214.4	79.4	2845	78916	19596	0
KOS-A022c	236.5	374.1	16.9	111.1	23.2	41.2	85	15	208.6	33303	363.7	192.8	64.8	2420	66379	16958	0
KOS-A023a	244.4	363.1	22	155.1	27.6	44.6	91.1	40.2	195.2	37803	284.8	233.8	106.9	3389	53876	23996	0
KOS-A023b	239.3	338.8	26.6	152.1	26.7	50.4	90.4	21.5	197.3	37457	412.4	187.2	83	3286	46169	23124	0
KOS-A023c	248	354.6	22.3	153.5	31	48	92.4	24.2	204.4	37660	364.9	177.1	101.8	3401	54095	25022	0
KOS-A024a	212.5	348.8	15.6	121.4	23.2	29	84.1	30.4	179.6	31024	351	276.1	70.9	2576	84742	21175	0
KOS-A024b	199.8	330.2	18.1	114.8	23.4	29.4	76.5	34.6	168.9	27777	329.6	199.4	70.2	2211	95459	19451	0
KOS-A024c	230.8	367.6	18.5	125.8	23.9	25.8	79.1	23.4	198.6	32620	330.9	248.6	83	2873	74495	22960	0
KOS-B001a	175.6	256.3	6.3	101.9	21.4	35.3	71.8	31.8	404.2	34799	782.7	357.7	60.5	2178	109045	18052	1
KOS-B001b	184.1	246.5	6.5	104.7	20.5	52.6	80.5	47.7	373.3	37406	715.3	434.5	67.2	2555	81783	20750	1
KOS-B001c	181.4	268.6	9.2	103.6	19.1	38.2	83.1	35	422.3	36328	744	302.9	64.4	2285	114224	19201	1
KOS-B001d	190.7	273.3	11.6	103.4	20.4	43.7	90	24.8	433.5	37766	813.5	318.6	69.5	2245	113991	19352	1
KOS-B001e	178.7	265.6	10.4	102	20.5	34.7	85	25.4	424.8	35885	753.4	317.3	64.8	2242	111426	18955	1
KOS-B001f	181.5	271.1	7.3	102.8	17.4	41.1	87.4	32.9	420.5	36890	745.3	293.2	59.5	2133	109044	18470	1
KOS-B001g	163.3	243.3	8.4	96.5	18.2	32	73	19.3	384.4	33092	689.5	288.3	46.4	1803	90791	15146	1
KOS-B001h	176.4	257.3	7.2	94.7	18.7	37.3	74.6	26.7	392.4	33146	714.4	302.3	48.8	1766	93658	15553	1
KOS-B002a	181.2	250	8	96.1	16	31.6	78.7	32.4	394.8	35009	575.7	368.9	59.3	2210	106542	17473	1
KOS-B002b	183.2	244	12.8	97.7	15.6	26.6	73.4	35.3	387.8	34963	557.8	328.8	55.3	2067	90156	15764	1
KOS-B002c	200	269.7	10.1	102.8	20.6	32.1	78.9	16.1	367.5	36607	577.4	374.2	63.4	2260	107000	18301	1
KOS-B003a	191.1	256.5	12.3	101.8	18.5	30.3	76.9	37.1	391.1	35553	574.2	418.5	66.3	2453	114644	20052	1
KOS-B004a	173.5	256.3	9.2	86	15.5	30.2	70.7	29.9	386.8	34015	567.3	386.9	71.6	2545	97033	17609	1
KOS-B004b	195.5	267.9	10.3	90.3	18	32.3	83.8	21.7	404.2	36599	631.9	377.3	55.7	2514	99097	18333	1
KOS-B004c	187	265	9.8	86.2	15.3	35.3	83.4	26.8	387.7	35201	571.8	386.5	71.7	2553	102927	18716	1
KOS-B004d	184.4	266.4	11.5	87	17.9	30.5	71.9	24.4	372.2	33870	592.1	409.5	82	2494	97169	18121	1
KOS-B004e	183.7	274.3	9.4	89.5	16.5	31.9	79.9	18.8	361.3	35306	613.5	394.7	67.3	2566	103501	18302	1
KOS-C001a	194.6	145.4	9.5	110.5	10.9	27.8	80.8	39	82.2	34239	537.3	141	108	3443	61079	18022	2
KOS-C002a	205.6	151.6	12.8	108.6	11.7	28.1	91.1	44	131.2	34459	606.7	150.1	106	3549	76543	18502	2
KOS-C002b	190.9	166.2	12.2	106.7	13.7	26.8	84.7	39.2	90.6	34331	604	110.6	90.8	3536	79118	19855	2
KOS-C002c	189.3	159.8	11.1	107	14.6	29.4	84.1	44.9	95.6	34189	661.3	166.1	97	3946	81475	20675	2
KOS-C002d	189.6	146.4	15.6	107.4	15	24.4	80	43.8	96	31185	521.4	98	73.2	2931	60260	16235	2
KOS-C002e	206.8	154.5	14	115.3	15.5	28.6	89.3	39.1	116.3	36172	673.1	132.8	112.7	4054	90562	22477	2
KOS-C002f	208.4	151.7	11.9	114.7	13.9	29.1	88.4	41.7	125.8	35036	654.8	111.7	104.3	3932	84147	21169	2
KOS-C002g	183.6	151.5	8	105.2	13.3	24.3	74.1	45.2	82.5	31870	593.7	109.1	68.4	2986	66902	16386	2
KOS-C002h	198.9	146.4	7.1	108.2	12	25.1	85.1	41.4	117.4	33006	572.4	89.5	75.3	3435	73176	18590	2
KOS-C002i	178.6	151.6	11.7	103.5	13.4	23.9	78.7	41.4	93.1	31009	579.3	110.8	82.9	2939	70845	16306	2
KOS-C003a	235.5	391.5	11.5	84.2	23.7	13.8	64.7	28.6	202.1	33671	313.4	290.8	70.8	2847	76037	13950	2
KOS-C003b	226.6	381.6	15.4	79	21.5	14.5	73	20.4	216.4	31555	393.6	231.6	63.9	2784	75200	13945	2
KOS-C003c	231.8	394.4	12	84.5	24.8	13.3	77.3	27.6	201.3	33848	355.5	221.7	90.4	2926	80795	14401	2
KOS-C003d	226.2	393.5	15.3	81.6	25.3	16.6	71.9	15	172.8	34194	339.6	194	59.5	2397	64317	12079	2
KOS-C003e	236.5	403.4	17.2	83.6	23.2	15.8	76.5	32	197.1	34925	342.1	226.8	89.9	2987	82781	15497	2
KOS-C003f	227	386.8	14.2	83.1	23.5	16	72.4	23.7	183.2	34975	383.6	223.3	70.4	2836	74076	13969	2
KOS-C003g	223.5	385.4	8.4	83.2	23.6	12.7	74.3	27.8	179.5	33954	360.9	213.3	74.5	2609	70998	13441	2
KOS-C003h	224.3	391.9	9.7	84.6	26.8	14.8	71.5	16.4	189.6	34823	319.3	203.8	79.4	2601	68857	12936	2
KOS-C003i	228.7	378.3	12.4	76.7	25	13.4	69.9	31.8	202.8	32260	341.2	225.1	54.9	2547	67346	12561	2
KOS-D001a	251.9	305	8.5	119.8	19.3	33.6	76.4	36.8	130	31834	548.2	149.4	75.9	3383	51272	18044	3
KOS-D001b	271.6	309.1	13	130.5	23.1	31	80.7	45	114.4	35695	658	204.2	92.4	3920	63891	21723	3
KOS-D001c	249.5	294.1	16	120.2	21.4	33.5	81.7	27	122.7	31904	582.4	117.4	81.4	3424	52582	18888	3
KOS-D001d	257.5	294.3	16.1	122.6	22	36.4	75.6	44.4	133.9	33890	592.8	131.4	100.1	3615	57071	20791	3
KOS-D001e	264.7	303.8	12.9	125.8	20.5	34	81.9	37.4	140.7	33842	644	145.8	99.1	3869	62234	21055	3
KOS-D001f	240.9	277.7	12.3	113	22.1	30.8	73.7	44.1	107.3	30656	584.8	113.5	69.9	3043	50428	16560	3
KOS-D001g	243.5	292.3	11.4	122.6	21.3	34.8	72.2	44.1	122.3	31790	591.8	128.4	89.8	3232	50653	17986	3
KOS-D001h	251	291.2	13.3	119.6	19.6	38.5	73.5	41.7	123.6	32670	573.3	128.9	75.2	3399	53711	19499	3
KOS-D002a	288.9	298.6	14.5	119.9	21.4	35.3	78.9	51.2	121.4	33789	760.3	273.1	96	3618	63390	20355	3
KOS-D002b	270.9	301.3	15.2	119.8	22.2	39.1	84.9	29.5	114	33312	460.2	160	99.6	3835	53107	21337	3
KOS-D002c	246.2	300.5	11.6	118.9	23.5	37	80.1	33.8	119.7	31579	708.5	136.6	90.6	3757	60415	21357	3
KOS-D002d	246.4	302.3	13.1	119.2	22	37.9	77.7	33	125.5	31701	649.4	133.6	95.8	3777	60402	20904	3
KOS-D002e	302.7	298	14.6	120.3	22.5	35.1	73.5	33.8	130.5	34112	719.5	217.7	108.8	3561	60033	19853	3
KOS-D002f	254.3	293.4	14.1	113.8	22	32.7	72.4	33.9	123.6	30620	561.3	159.7	89	3088	55303	18208	3
KOS-D003a	193.9	273.6	13.9	126.5	20.2	35	72	30.8	170.7	31736	628.9	183.2	90.7	2659	54057	19300	3
KOS-D003b	221.3	291.9	13.5	142.6	22.7	43.5	84.4	23.8	178.6	36563	697.6	218.6	114.7	3393	57612	24126	3
KOS-D003c	218.5	284.5	18	145.6	23.4	44.2	92.1	32	171.1	36864	694.5	189.4	96.5	2980	42756	20659	3
KOS-D2001a	220.7	159.8	8.6	110.8	13.5	43	128	53.3	138.7	41068	455.1	165.2	91	5658	10102	31729	4
KOS-D2002a	242.5	194.4	7.6	90.4	18.6	33.2	147.7	53.1	193.1	42531	478.1	270.4	80.5	5309	26630	16641	4
KOS-D2002b	264.7	197.8	7.7	99.2	18.3	33.7	172.7	59.3	183.1	50677	576.9	309.2	105.9	7019	28491	21984	4
KOS-D2002c	249.8	181.8	7.3	95.5	17.1	41.6	119	57.7	155.1	44343	440.3	259	71	4535	21282	13589	4
KOS-D2003a	226	208.1	9.2	112.2	14.9	33.3	147.9	43.1	205	42266	710.5	237	106	4916	24991	19553	4
KOS-D2003b	231	171.9	9.4	109.7	12.9	34	104.7	32.9	173.9	37478	598.5	238.2	93.1	4191	18332	15570	4
KOS-D2003c	227.1	178.3	7.6	121.4	14.6	31.3	208.3	49.8	137.1	39430	440.7	161.8	90.9	4072	17249	17638	4
KOS-D2004a	240	183.1	11.6	116.5	18.6	42.3	212.6	57	180.1	40171	747.1	231.3	84.8	4812	19440	22269	4
KOS-D2004b	248.2	200.2	8.1	117.7	20.2	35.1	321.1	55.1	209	48973	1154.2	287.5	143.6	6441	26554	23373	4
KOS-D2004c	238	188.7	11.6	105.1	18.5	33.4	233.9	48.5	165.6	44066	867.1	232.8	79.9	4649	17135	15082	4
KOS-D2005a	244.4	174.1	10.9	107.3	16.8	45.3	175.8	47.8	132.4	43123	438.7	208.5	109.1	5746	13665	21656	4
KOS-D2005b	227.4	159	10	105.2	15.5	37.7	137.6	48.7	147.7	46411	541.2	216	110.2	5945	8126	23143	4
KOS-D2006a	253.6	181.6	14.3	92	17.3	37.7	135.4	59.5	195.8	45805	552.5	342.8	118.1	5990	21008	18853	4
KOS-D2006b	260.5	176.8	9.1	114.3	17.6	39.1	142.8	48.6	190.3	47681	543.6	267.6	93.2	6558	14211	29271	4
KOS-D2006c	237.7	163.6	10.5	106.3	16.2	34	174.4	58.8	155.2	38343	473	177.4	87.7	4718	13185	19243	4
KOS-D2007a	256.4	215.8	10.6	124.1	18.4	42.4	160.1	55.9	181.3	51386	770.5	215.7	97.6	6480	27829	22210	4
KOS-D2007b	230	183.1	9.5	108.7	14.2	38.4	173.2	41.6	169.2	50114	619.7	191.9	109.4	6245	20777	21470	4
KOS-D2008a	224.7	197.8	11.1	107.1	17.6	36.9	615.7	56.7	190.8	48537	758	235.9	71.6	5735	34209	19115	4
KOS-D2009a	251.1	173.9	9.9	126.2	17	41.1	302.9	54.9	156.1	48167	505.1	181.7	140.1	6554	13216	27291	4
KOS-D2009b	236.3	158.6	11.4	113.4	17.2	37.7	228.4	68.3	134.8	43294	400.9	182.9	136.9	6149	7544	26457	4
KOS-D2010a	246.4	208.9	14	123.3	17.1	43.2	216.5	49.6	147.5	45561	857.2	192	90.3	5347	31020	20123	4
KOS-D2010b	237	215	11.8	123.2	15.6	53.2	185.2	58.6	162.3	43523	811.9	190.5	95.1	5230	31634	21399	4
KOS-D2011a	279.3	186.7	15.7	109.6	20.5	36.9	201.7	54	206.1	46503	533.7	267.1	84.9	6088	27526	20068	4
KOS-D2011b	245.8	187.2	9.8	105.2	18	38.8	203.8	56.3	147.4	40398	628.8	197.2	83.5	4302	25899	15666	4
KOS-D2012a	241.6	190.3	12.1	115.8	16.9	38.3	158.4	47	180.4	45053	863.4	228.5	79.5	5100	24777	18656	4
KOS-D2012b	251.9	189.7	11.9	126.4	18.1	44.6	485.7	58.9	171.8	47709	815	249.8	116.7	4941	28108	18340	4
KOS-D2012c	246.8	187.5	7.4	111.4	19.7	39.9	182.4	50.4	169.2	44267	555.6	206	109.5	5332	25911	18423	4
KOS-D2013a	222.4	164.5	14.2	116.8	13.4	34.4	264.2	35.8	166.6	38215	477.5	186.9	90.9	3894	21730	15581	4
KOS-D2013b	230.4	185.1	7.9	113.2	14.9	35.8	162	58.4	178.7	41317	700.7	220.9	92	4268	19323	17484	4
KOS-D2013c	245.1	195.5	14.9	136.3	19.4	38.1	210.3	56.2	126.8	42971	655.1	218.2	93.5	4884	29489	21430	4
KOS-D2014a	232.6	186.4	10.9	111.6	16.9	37.8	200.8	56.6	200.4	46386	1105.1	241.2	110.1	5849	22099	20732	4
KOS-D2014b	239.1	193	12.5	119.6	18.8	36.6	363.2	57.7	154.9	43827	943.2	210.2	101.8	4980	23169	19493	4
KOS-D2014c	270.5	176.7	11.4	109.8	19.3	39.8	278.2	65.2	187	54573	778.1	265.1	90.6	7164	27431	20131	4
KOS-D2015a	239.2	244.1	14	127.2	19.2	36.4	150.3	54.6	154.8	40730	778.8	201.7	92	4435	50290	20458	4
KOS-D2015b	232.4	237.3	14.2	118	16.8	33.6	133.8	40.4	159.7	39152	713.3	175.2	111.4	3964	48982	17488	4
KOS-D2016a	266.2	191.6	8.4	114	17.9	44.3	415.9	56.9	173.4	45629	1433.1	262.4	104	6143	30916	21230	4
KOS-D2016b	240	189.4	7.3	104.1	17.7	34.5	448.2	50.1	150.5	39480	729	201.9	82	4311	25568	17386	4
KOS-D2017a	215.8	168.1	13.4	106	15.7	34.4	436.9	56.2	199.3	43304	576.5	230.5	97.8	5492	23400	19303	4
KOS-D2018a	225.2	176.2	13.9	123.6	17	40.9	173.9	58.8	185	46752	709.9	198.9	124.9	6541	21365	32756	4
KOS-D2019a	221.8	183.6	15.6	120.5	15	35	203.9	37.1	138	37535	597.1	147.3	92.6	4105	26317	18635	4
KOS-D2020b	236.5	146.4	9.3	122.4	17	47.3	159	56.4	172.2	48848	537.2	218.8	113.3	5947	9408	25203	4
KOS-E001a	156.1	217.5	10	107.7	12.3	21.3	99.7	66.7	246.4	38994	560.5	372.1	100.4	3530	75704	19481	5
KOS-E001b	155.2	216	11.2	107.4	9.4	23.2	90	50.2	239.8	37532	519.5	331	100.6	3378	79897	18809	5
KOS-E001c	162.8	211.9	11.7	104.8	13.9	21.5	94.2	49.2	227.3	39563	535.5	281	93.1	3335	68755	18592	5
KOS-E001d	157.9	222	11.5	107.1	8.5	22.6	91.5	50.9	250.5	39580	560.1	337.5	91.7	3688	84973	20383	5
KOS-E001e	155.6	214.6	13.9	102.8	10.5	24.1	89.2	46.3	236.9	37600	565.6	331.5	106.6	3329	78780	18860	5
KOS-E001E	158.2	212.5	7.9	110.2	9.7	23.9	95.2	45.8	257.5	39462	512.8	278.3	89.3	3340	71653	18120	5
KOS-E001g	155.1	218.5	11.2	106.1	10.4	21.1	94.2	46.7	235.4	38659	518.2	315.6	93.1	3441	82139	19530	5
KOS-E001h	160.4	214.6	12.9	110.4	11.2	22.4	105.6	53.1	259.7	39990	590.5	354.5	75.6	3763	78549	20698	5
KOS-E001i	164.9	201.2	10.9	104.1	8.9	19.6	95.4	49.9	224.6	37430	511.5	247.8	84	3217	69568	17778	5
KOS-E002a	158.5	213.7	11.1	106.2	9.9	19.2	96.9	61	242.2	38171	495.4	290.6	94.1	3380	76894	18892	5
KOS-E002b	154.3	212.3	11.9	106.7	9.6	21.3	97.8	33.9	213.1	38650	503.3	342.8	95	3344	78750	19361	5
KOS-E002c	156.5	212.5	13.9	107.3	11	20.8	86.1	40.9	229.8	38946	509.8	293.9	87.5	3374	74059	19087	5
KOS-E002d	162	218.7	16	109.9	9.1	26.2	92.2	30.9	261.4	39585	524.9	304.8	105.8	3662	84189	20646	5
KOS-E002e	152.6	214	10.1	105.9	8.2	21.6	97.2	45	220	36867	444.9	267.2	91.5	3172	72541	18252	5
KOS-E002E	160.9	217.6	5	112.1	10.3	21.5	97.8	32.5	232	40171	530.8	321.1	104	3683	76870	20403	5
KOS-E002g	152.2	210.6	7.3	107.6	9	19.9	89.8	35.4	208.9	36911	457.9	301.7	102.8	3232	73823	18403	5
KOS-E002h	164.3	218.4	11.7	112.9	10.5	23	92.9	39.4	224.5	40491	479	269.3	84.2	3341	68235	19268	5
KOS-F001a	204.8	195.9	14.1	136.3	12.5	24.5	85	39.9	151.5	36697	593.3	267.2	125.2	4920	38391	26696	6
KOS-F001b	198.3	190.9	14.4	134.3	13.1	25.1	85.7	38.4	160.8	36020	605.1	217	114.6	4658	36105	26051	6
KOS-F001c	187.7	180.9	15.6	127.9	11.2	27	83	33.5	136.8	35170	549.9	252.2	135	4540	32506	25206	6
KOS-F001d	193.9	195.2	17.5	138	12.8	25.6	89.3	27.4	139.6	38346	637.6	255.8	131.7	5304	40481	30050	6
KOS-F001e	186.6	189.8	16.7	132.8	11.4	25.4	85	34.5	143.9	34987	624.7	235.7	133.4	4731	37413	25818	6
KOS-F001f	185.6	188.8	11.5	131.5	12.8	26.6	84.5	38.1	142.3	35998	595.3	223.2	125.5	4630	35940	25983	6
KOS-F001F	201.3	198.6	14.7	136	12.5	23.3	80.8	41	150.6	35385	608.4	188.6	117.2	4640	36937	26077	6
KOS-F001h	184.6	197.2	15.5	136.8	13.9	25	83.2	41.7	161.4	36068	598	220.6	128.9	5070	41422	28055	6
KOS-F001i	180.1	179.6	13.2	128.5	11.6	21.5	82.2	25.2	128.4	33688	545.3	229.5	107.4	4339	32251	24171	6
KOS-F002a	228	162.6	11.6	141.4	13.2	23.5	87.8	38.2	145.7	40998	675.3	205.6	123.9	4941	19754	20457	6
KOS-F002b	227.7	172.7	17.8	147.8	13.9	26.7	87.4	38.4	147	43334	685.8	239.2	131.1	5703	25240	24813	6
KOS-F002c	232.5	163.9	5	145.2	12	23	90.8	36.5	133.3	41570	670.3	232.1	108.1	5037	19110	21502	6
KOS-F002d	216.8	166.2	8.5	141.4	14.2	23.4	77.9	50.6	126.3	40615	661.7	237.2	119.9	4864	20603	21523	6
KOS-F002e	235.8	174.2	10.5	148.8	13.2	26.2	94.7	47.8	137	44854	699.7	243	116.5	5743	26017	25160	6
KOS-F002f	215.1	158.5	12.2	137.5	15.5	23	83.3	39.4	120.7	39443	607.1	206.9	99.8	4641	19398	19823	6
KOS-F002F	216.3	162.9	9.8	139.4	13.9	23.6	85.1	38.1	156.2	40464	603.9	214.4	94.2	4891	19436	20876	6
KOS-F002h	221.8	159.8	11.7	138.7	11.7	26.8	84.2	27.4	127.2	40238	618.1	211.6	117.9	4844	20655	20720	6
RHO-A001a	134.5	206.9	13.5	101.8	8.7	34	97.5	66.3	510.6	55759	717.7	638.8	117.1	3756	54714	18184	7
RHO-A002a	126.9	200.8	12.7	94.4	4.5	18	96.9	64.2	440.2	50098	581.8	580.7	93.1	3527	56415	17034	7
RHO-A003a	117.8	276.8	5	89.8	4.2	23.5	95.2	194.3	384.8	43839	495	514.9	99.6	3291	67409	17770	7
RHO-A004a	123.8	140	6.5	78.2	5.4	13.9	102.9	61.4	464.3	53001	662.2	812.2	107.3	4065	39745	14857	7
RHO-A005a	121.5	286.7	8.2	87.5	5.1	13.8	86	47.3	445.4	47431	571.3	605.2	82.3	3433	79273	15806	7
RHO-A006a	132.6	283.9	5	88.6	5.3	16.5	102.1	47.5	511.6	55360	782.6	697.7	90.9	3819	78068	16655	7
RHO-A007a	118.8	328.6	11.3	86.8	5.1	17.9	108.5	60.5	428.5	42179	595.1	307.4	65.5	2261	38449	9101	7
RHO-A008a	130.6	261.9	8.1	100.9	9	25.3	104.2	53.3	475.1	49738	688.3	560.6	92.6	3239	57205	15855	7
RHO-A009a	126.3	278	8	93.3	4.7	44.9	107.1	72.8	400.9	46155	614.3	542.5	92.5	3544	54778	16011	7
RHO-A010a	120.3	183.7	10.5	95.2	6.3	13.8	89.1	48.4	414.5	47023	508.8	510.2	115.2	3519	48149	15941	7
RHO-A011a	114.5	184.3	6.1	61.1	6.3	13.8	88	69.6	453.9	45888	518.5	599.1	95.7	3803	65317	14664	7
RHO-A012a	121.9	271.4	12.4	91.5	6.8	15.8	94.7	48.2	494.7	51329	686.3	567.3	98.4	3571	69105	16169	7
RHO-A013a	113	246.5	8.4	82.7	3	16.9	92.8	47.5	484.4	49950	562.7	550	93.7	3185	65614	13821	7
RHO-A014a	124.6	222.6	6.7	102.2	6.7	16.4	586.2	64.3	417.3	50689	658.5	631.7	97.6	4049	59320	19245	7
RHO-A015a	135.6	238.7	6.3	91.6	7	22	401.1	51.3	455.7	53080	628.8	580	98.5	3490	56811	15965	7
RHO-A016a	135.6	157.1	9.6	78.6	3.5	18.6	114.9	52.9	371.9	42447	639.6	508.7	88.2	2766	29788	8044	7
RHO-A017a	117.8	253.3	6.7	45.2	6.5	13.5	112.1	47.8	424.2	42612	593.4	340.5	76.8	2478	48152	6895	7
RHO-A018a	125.1	249.3	5	55.6	5.7	13.3	97.9	61.9	443.6	51327	662.5	541.5	101.1	3908	66903	13232	7
RHO-A019a	125	221.8	5	81.1	5.6	15.3	90.3	51.5	420.9	47092	610	680.5	116.8	3994	62436	15951	7
RHO-A020a	111.6	239.4	5	69.8	3	12.1	83.2	49.7	409.3	44170	552.2	423	112.3	3408	60823	15670	7
RHO-A021a	117.9	237.9	9	88	7.5	26.3	99.2	49.8	467.9	49503	632.2	643.2	94.7	3435	58855	16208	7
RHO-A022a	120.2	243.7	5	61.8	7.8	15.3	96	48.1	421.4	44922	637.6	511.1	80.6	3326	69762	13183	7
RHO-A023a	128	256.9	5.8	74.4	6.3	14.6	101.3	62.5	448.3	50314	662.3	627	91.5	3815	64443	17805	7
RHO-A024a	125.9	238.1	5	78.5	7.1	15.8	97.8	46.8	429.9	50168	705.4	517.6	99.3	3759	50360	14796	7
RHO-A025a	141	190.8	5	73.1	3	21.8	99.6	60.9	359.2	49845	528	493.9	122.3	3833	38977	12964	7
RHO-A026a	111.2	233.4	7.9	80.8	6.7	15.3	99.7	50.8	469.2	49924	598	622.4	97.6	3291	57032	15236	7
RHO-A027a	123.9	245.4	6	89.2	5.2	15.8	100.4	56.6	373.9	41682	546.6	404	78	2339	35245	8498	7
RHO-A028a	132.4	281.8	9.2	99.5	7.1	13.6	104.2	58.8	414.9	49712	621.6	495.6	96.9	4023	65753	19577	7
RHO-A029a	127.3	251.4	7	89.7	5.5	16.4	111.3	47.3	401	44502	560.6	380.6	84.3	2993	45074	10261	7
RHO-A030a	127.6	264.1	7.2	95.4	6.6	13.2	92.1	61.1	430.9	49370	688.1	610.6	103.5	4003	69660	19534	7
RHO-B001a	155	119	9.5	116.1	9.2	19.2	95.9	59.3	209.3	41971	519.9	339.2	140.3	4359	31908	22872	8
RHO-B001b	148.1	114.3	7.9	113.8	9.3	20	90.8	56.1	195.6	40768	507.9	297.7	117.3	4005	30325	21543	8
RHO-B001c	160.8	96.4	6.4	122	8.7	22.6	106.7	47.1	186.4	44018	480.8	269.6	106.3	3937	29270	19885	8
RHO-B002a	145.3	92.3	8.1	120.4	7.4	19	98.2	58.7	160.9	38836	424.7	260.4	122.3	3881	27829	21192	8
RHO-B002b	155.5	96.3	12.7	123.7	8.3	19.3	94.4	41.6	138	40497	429.9	243.2	129.1	4137	29672	22814	8
RHO-B002c	152.3	99.6	16.1	127.1	9.5	20.3	102	46.8	161.9	42338	434.2	235.9	119.5	4120	31147	23455	8
RHO-B003a	155.8	96.3	5	120.3	10.3	26	103.1	61.4	187.1	45043	547.3	261.7	114.1	3691	58975	21103	8
RHO-B004a	162.1	153.3	11.5	119.3	11	28.3	100.4	88.2	162.5	37549	535.5	199.7	102.1	3731	47005	20817	8
RHO-B004b	157.8	150.7	10.7	119.5	10.5	136	90.7	67.5	152.8	37779	525.5	201.7	94.4	3973	54455	23236	8
RHO-B004c	150.6	150.3	7.6	116.5	10.1	105.3	88.3	62	116.5	36737	420.8	166.8	82.1	3287	46963	19137	8
RHO-B004d	159	153.1	9.4	120.6	12.1	101.1	94.5	69.5	151.9	38181	417	153.6	114.2	3901	55095	22450	8
RHO-B005a	162.5	114	12.1	130	11.9	73.6	93.1	63.3	133.7	38286	432.4	161.8	90.6	4061	45373	24211	8
RHO-B005b	165.8	114	8.7	133.8	9.3	66.8	97.6	53.6	148.3	38534	427.5	124.7	106.3	3656	42701	22170	8
RHO-B005c	162.2	113.5	10.6	135.6	11.2	67.8	97	54.2	139.8	38840	435.1	132.9	90.7	3823	43171	22953	8
RHO-B005d	158	117.8	11.9	132.8	10.6	69.7	97	60.5	114.8	39479	430.8	142.9	102.5	3883	41471	22781	8
RHO-B006a	142.7	226.5	12.4	108.3	11.9	44	87.7	50	251.7	37989	547.7	507.6	93.5	3362	50638	19718	8
RHO-B006b	149.3	203.8	5	111.1	7.6	39.2	90.3	47.2	214.1	37885	548.3	263.7	85.8	3199	41556	18628	8
RHO-B007a	149.7	167.5	5	112.7	9.5	36.1	97.1	56.7	209.4	39616	497	298	101	3528	40229	19309	8
RHO-B008a	136.9	190.4	8.3	98.5	8.7	16.7	84.6	60.1	245.5	38283	491	356.9	125.4	3668	57944	22137	8
RHO-B008b	136.8	206.3	6.7	99	9.1	19.8	88.4	62	260.1	38277	505.6	320.2	125.9	3599	61550	21595	8
RHO-B008c	142.5	188.2	7.5	100	7.8	20.4	86	54	249.8	38049	475.1	388	105.3	3636	57587	21577	8
RHO-B008d	157.1	217.2	11.8	119.7	8.3	43	105.5	42.3	226.7	48183	450.9	284.9	100.6	3386	50573	20221	8
RHO-C001a	142	86.8	5	95	5.9	22.5	107	45.1	186.7	41391	546.2	189.7	89.2	2542	10359	7943	9
RHO-C001b	147.7	96.7	9.7	104.3	8.5	24.2	104.7	51.2	236.9	52084	618.7	298.3	142.5	4879	20490	19550	9
RHO-C001c	150.1	105.2	11.6	106.5	7.7	29	146.6	61.9	239.9	53705	653.4	319.4	125.1	3970	34185	16602	9
RHO-C001d	145.9	93.9	11.2	102.4	7.7	22.3	104.1	46.4	239.2	51420	666.4	317.2	128.2	4425	19166	18966	9
RHO-C001e	144.2	93.2	10.5	99.7	6.1	23.7	101.7	43.9	206.3	49459	673.1	303.9	120.2	4117	18737	17736	9
RHO-C001f	139.8	91.1	12.4	99	9.7	21.2	100.7	47.4	222.9	48853	632.1	241.4	118.9	3825	16282	16067	9
RHO-C002a	151.9	125.5	10.1	104.2	5.2	17.8	93.3	45.2	164.7	45879	566.1	218.2	139.3	4553	27915	21974	9
RHO-C003a	172.3	143.3	7.8	109.9	7.1	86.5	118.2	71.7	168.7	44679	516.4	129.9	127.6	3738	17946	12694	9
RHO-C003b	163.3	146.6	12.3	107.1	8.3	67.4	101.8	53.5	172.1	49567	570.2	210.8	134.2	5030	25616	21737	9
RHO-C003c	162.7	144	12.1	111.6	8.5	155.9	105.1	72.4	182.6	51307	632.1	227.9	153	5481	22079	23437	9
RHO-C003d	167.6	142.7	11.1	106.7	10.8	69.2	102.3	61.6	179.7	49519	629.5	197.7	143.9	5067	25844	22711	9
RHO-C003e	162.3	145.7	13.9	109.9	9.5	103.6	108.8	75.2	177.7	51489	607.5	209.6	171.9	5461	25062	23824	9
RHO-C003f	165.3	149	13.6	108.9	10.6	74.2	101.3	72.9	159.4	50196	617.4	175.4	175.9	5254	26905	23660	9
RHO-C004a	156.7	87.4	11.1	109.8	7.7	22.2	109.7	56.3	137.5	56740	617.3	263.3	167.7	5492	24226	23061	9
RHO-C004b	149.6	85.3	10.4	107.5	4.7	45.6	147.6	70.8	151.3	55285	728.8	264.8	162.8	5160	18056	20813	9
RHO-C004c	158.9	83.8	11.6	111.2	8.6	27.6	110.4	61.8	139.8	56500	660.8	272.6	155.1	5381	21398	22642	9
RHO-C004d	147.8	80	11.6	98.8	5.8	19.8	100.7	51	157	49500	621	222.7	154.3	4318	18671	18371	9
RHO-C004e	155.3	89.6	13.8	109.4	8.3	45.4	148.4	45.4	154.6	56339	758	228.8	185	5307	19348	22573	9
RHO-C004f	152.2	101	13.6	108.2	8.2	46.7	150.9	58.2	159.5	54104	732.4	213.2	153.6	5125	34128	21834	9
RHO-D001a	90.9	246.7	5	41.5	3.4	9.3	78.8	64.6	587.5	50069	694.4	1071.8	84.9	2632	90106	8116	10
RHO-D001b	93	283.4	5	40.8	3	27.8	103.5	66.5	603.2	51296	644.1	744.2	61.2	2047	81564	7014	10
RHO-D001c	84.7	277	7.9	37.4	3	26	103.6	63.4	549.3	47772	653.6	697.9	73.2	2097	76700	6264	10
RHO-D001d	87.2	292.3	5.4	38.3	3.8	35.1	97.8	54.5	572.6	48438	673	929	82.9	2273	90402	7443	10
RHO-D001e	84.6	286.8	6.7	37.8	4.6	34.8	89.9	57.6	570.3	50207	643.6	768.4	75	2220	86786	7132	10
RHO-D001f	88.7	246	5.5	41.8	3	9.4	90.1	35.6	609.1	50266	668.9	1014.8	98.4	2556	88347	7971	10
RHO-D001g	88.7	245.2	10.4	37.7	4.7	8.7	90.5	56.7	598.6	48624	640.4	1225.5	96.5	2568	92763	8200	10
RHO-D001h	85.2	277.6	5.9	37.8	3	7.4	85.5	45.8	595.9	49826	680.8	960.6	82.5	2576	93468	7689	10
RHO-D001i	84.8	290.5	8.5	40.2	3.4	31.5	95.1	66.5	592.7	50835	676.8	890.9	72.1	2360	94140	7657	10
RHO-D001j	88.4	302	9.8	40.5	3	29.7	97.5	62.3	614.8	51191	633	872.5	91.7	2377	93080	7604	10
RHO-D001k	86	257.3	5	39.2	3	7.3	80.3	50.1	586.8	48873	678.4	1001.4	75.7	2612	98647	7868	10
RHO-D001l	82.1	257.1	5	40.6	3	5.8	94	46.9	627.5	50558	665.3	1017	86.1	2639	91197	8207	10
RHO-D002a	98.8	254.7	6	40.8	3.3	15.7	157.2	45.2	439	37620	701.4	749.2	48.9	2535	94198	8138	10
RHO-D003a	101.1	155.2	7.3	65.4	5.8	16.6	111.6	63.6	448.8	47261	702.4	570.4	90.3	2791	43019	9981	10
RHO-D003b	90.8	142.5	6.4	60.1	4.4	15.2	91.7	59.1	415.9	46276	633.8	636.8	92.1	2912	49589	13592	10
RHO-D003c	98.9	157.8	7.8	63.6	3	16.9	100.5	60.3	457.1	50113	711.1	595.3	105	3455	60269	15802	10
RHO-D003d	94.1	143.3	10.6	62	3.8	15.8	91.8	52.7	415.6	46414	620.2	592.4	95.3	3000	50764	13743	10
RHO-D003e	101.1	155.8	9	68.8	3.4	16.4	103.2	68.3	478.1	53097	702	664.5	103	3528	61668	16911	10
RHO-D003f	100	151.9	7.4	66.7	3	16.4	105	57.4	447.4	52543	689.6	657.2	123.5	3297	57327	15980	10
RHO-E001a	261.8	194.8	8.9	177	22.1	28.4	106.4	47.9	78.6	40928	552.3	196.1	115.4	4235	19934	20382	11
RHO-E002a	221.2	142.1	8.2	139.1	16.2	19.8	69.1	44.3	103.2	27676	463.8	204.6	104.7	4576	21994	25747	11
RHO-E003a	234.8	196	16	155.1	14.8	24	97.3	56	106.4	38981	859.6	199.2	132.5	4795	39094	28252	11
RHO-E003b	246.8	220.1	16.9	168.5	17.1	23.8	95.2	44.9	126.8	43505	893.4	187	101.2	3723	32163	21862	11
RHO-E003c	256.3	221.3	12.6	166.7	18.6	21.8	110.3	57.8	119.6	46106	881	187.6	104.4	3424	29744	20470	11
RHO-E003d	259.7	209.5	14.2	171.1	17.2	25	130.7	39	104.7	44135	862.8	174.9	117.3	4040	33478	24757	11
RHO-E003e	262.2	213.6	15.1	175.3	19.2	23.5	130	57.9	116.1	46095	908.3	168	108.9	3942	32283	24363	11
RHO-E003f	254.7	223	13.5	173.3	18.2	24.6	101.3	55	125.6	47307	940	176.2	84.9	3380	28521	20036	11
RHO-E004a	244.1	222.4	15.6	183.5	19.4	35.3	89.6	137	69.3	37624	376.2	208.2	90.9	4845	25647	27855	11
RHO-E004b	235.6	227.9	8.7	194.9	21.2	39.8	93.9	178.3	73.9	41737	464.3	208	104.5	4733	25426	27421	11
RHO-E004c	234	231.9	9.9	189.9	19.9	40.3	91.8	181.1	73	42166	495.8	207.4	101.7	4728	25837	27423	11
RHO-E004d	237.8	233.8	12.3	188.1	19.7	37.7	102.1	183.3	63.7	41985	505.9	195.7	117.3	4780	25611	27642	11
RHO-E005a	264.7	306.4	19.7	192.2	17.1	32.3	85.1	19.9	52.4	39951	470.4	159.5	91.2	3980	23629	22565	11
RHO-E005b	225.8	258.6	12.4	163.5	14.7	29.7	89.5	40.5	61.9	35725	367.9	161.3	87.7	4156	24051	23869	11
RHO-E005c	205.5	235.3	12.1	142.6	12	24.6	78.1	31	35.8	31564	320.4	163.9	82.2	3639	20182	20169	11
RHO-E005d	206.7	237.7	15.9	146.9	13.9	21.8	72.6	32.9	24.3	32169	296	171.3	84	4080	23360	23282	11
RHO-F001a	134.8	203.1	6.9	82.2	7.2	16	82.5	50.6	335.6	40476	669.3	385.3	132.4	3453	51861	19691	12
RHO-F001b	132.6	202.3	7.8	79	7.7	16.3	78.6	29.6	322.5	40699	660.3	334.5	110.9	3500	50855	19481	12
RHO-F001c	131	194.6	9.6	77	5.5	15.7	83.5	44.7	313.7	40230	628.9	354.8	105.6	3321	46392	17923	12
RHO-F001d	135.9	202.7	12.1	80.8	5.9	17.1	86.3	42.4	334.1	40571	707.7	329.7	108.4	3667	54487	20846	12
RHO-F001e	129.8	198.1	11.1	79.9	7.3	18.5	79.9	30.8	326.8	40674	718.2	338.8	109	3574	51352	19966	12
RHO-F001f	127.3	195	8.6	77.5	5.9	16.4	83.2	31.9	323.9	39254	625	330.5	106	3158	47465	18232	12
RHO-F001g	127	198.4	9.6	79	8.2	18.3	88.3	49.6	329.6	41087	691	421	105.3	3559	50536	18724	12
RHO-F001h	130.9	207.9	13.4	81.1	8.5	19.9	89.5	45.2	356.3	43361	728	425.4	100.4	3394	50412	19741	12
RHO-F001i	134.6	209	10.7	83.2	5	18.9	91	42.1	320.3	41459	670.8	414.5	93.9	3251	47385	18020	12
RHO-F002a	144.1	203.1	6.4	75.4	6.6	21.5	81	46.2	501.8	50945	790.9	965.7	99	3328	49994	13614	12
RHO-F002b	136.8	204.8	8.9	76	5.9	22.5	82	35.8	521.1	53890	763	953.9	102.5	3250	51608	13912	12
RHO-F002c	152.6	199.2	8.5	74.5	9.7	30.3	92.7	48.4	455.6	51281	825.8	1196	90.1	3090	47827	12912	12
RHO-F002d	148.9	204.9	9.3	80.3	6	25.1	95.9	44.8	543.5	57613	761.6	973.3	120.8	3923	51794	15992	12
RHO-F002e	148.3	207.2	10.1	78.6	8.1	21.5	88.9	37.1	526.1	55815	876.2	1013.4	114.7	3868	55949	16120	12
RHO-F002f	152.1	188	12.5	73.2	5.2	29.6	90.2	41.7	513.9	53617	837.4	1158	102.4	3372	41739	14183	12
RHO-F002g	156.6	180.5	11.2	73.2	4.7	20.1	87.2	35.9	486.4	52312	741.9	1010	98	3023	35052	12584	12
RHO-F002h	141.8	184.1	11.8	68.5	6	46.2	78.1	32	476.5	45738	781.7	802.7	83.5	2605	39842	10639	12
RHO-F002i	150.8	197.6	10.4	74.6	5.7	90.6	88.5	34.9	482.5	50506	855.2	835.5	70.5	2698	42454	11503	12
KNI-A001a	231.4	228.2	14.9	137.6	15.9	34.3	82.4	110.2	184	37951	462.5	295	116.3	5488	62234	36026	13
KNI-A001b	219.4	185.3	11.5	132.8	13.9	32.3	79.5	85.9	153	39504	467.8	312.6	122.8	5752	11351	26733	13
KNI-A001c	224.4	236	15.1	136.3	11.3	45.1	90.9	48.5	126.6	37646	266.3	290.7	130.5	5510	29737	25430	13
KNI-A001d	234.5	232.2	12.2	143.5	13.7	771.9	69.9	228.5	135.3	39847	375.4	271.6	135.2	5666	39991	26954	13
KNI-A001e	210.8	212	10.2	135	15.4	725.3	65.5	182.1	149.4	36298	356.3	322.2	118.5	5056	38043	25309	13
KNI-A001f	206.3	200.7	11.4	128.3	16.5	678.8	66.7	185.7	140.8	36937	306.6	293.6	122.1	4456	30392	21987	13
KNI-A002a	231.5	151	9.8	145.1	11.7	18.6	105.6	49.4	292	49880	454	406.2	110.9	4364	48980	20454	13
KNI-A002b	211.3	156.2	13.4	139.6	9.8	30.8	91.5	57.2	256.7	50308	541.2	375.3	119.8	5174	55428	23608	13
KNI-A002c	201.6	147.9	12.9	130.7	10.4	19.2	89.9	40.9	281.9	47981	446.2	444.6	112	5069	52512	22757	13
KNI-A002d	199.2	150.8	7.9	131.1	11.7	18.3	92.4	54.9	274	48446	554.6	415.8	135.3	4940	52008	22156	13
KNI-A002e	205.5	149.1	5	132.5	11.2	20.1	86	53.7	265.3	47716	520.6	405.5	118.3	5012	54306	23475	13
KNI-A003a	229.7	143.3	5	175.3	9.9	30.3	165.7	99	313.9	71670	803.9	343.8	80.9	3581	23390	15861	13
KNI-A003b	163.2	99.3	5	115.2	9.9	17.9	85	93.6	171.6	41352	387.6	404.6	116	4361	26088	19144	13
KNI-A003c	162.7	101.9	5	118.8	8.7	16.5	89.4	92.4	176.6	42838	376.1	406.5	126.6	4607	28444	20732	13
KNI-A003d	157.2	95.4	5.9	113.9	6.6	16.5	78.4	83.3	166.3	41467	361.2	423.2	109.1	4564	27487	19831	13
KNI-A004a	205.7	111.4	12.9	127.3	13	40.4	78.3	48.9	213.1	35457	421.6	293.4	96.2	3406	15170	26313	13
KNI-A004b	201.2	99.9	10.2	138.2	13.3	36.9	91.8	55.8	266.7	43888	570.2	486.7	127.9	5456	30278	29308	13
KNI-A004c	200.1	98.7	11.2	132.8	11.4	35.3	87.2	55.6	274.1	43610	518.5	460.6	132.2	5290	32414	30376	13
KNI-A004d	190.1	108.3	11.9	119.4	11.7	30	74.5	33.3	244.2	34881	508.1	243.9	87.2	3148	21788	41989	13
KNI-A004e	191.9	110.6	14	126	12.4	30.2	83.8	44.9	261.3	39460	491.4	315.1	113	4267	29591	43462	13
KNI-A004f	193	110	14.1	129.8	11.7	31.3	82.2	39.2	277.2	39637	504.4	356.9	132	4306	29023	44511	13
CHI-A001a	208	162	9.3	151.4	14.6	27.6	110	41.9	64	44536	472.3	188	82.3	3467	27724	18339	14
CHI-A001b	252	211	14.1	208.9	19.4	38.5	173.1	78.5	171.6	78013	1016	245.1	120.9	4378	22595	22636	14
CHI-A001c	209.7	149.9	9.7	150.3	14.4	23.6	99.7	37.3	105.9	44980	554.1	188.4	135.5	4689	26994	24945	14
CHI-A001d	214.8	149.9	13.3	149.7	10.8	25.6	97.3	40.8	109.2	43573	530.5	226.1	115.9	5145	29549	26480	14
CHI-A001e	211	148.6	11	155.7	14	26.6	121.4	36.6	131.1	45046	547.2	205.3	101.8	4234	24173	22661	14
CHI-A002a	253.8	319.7	16.2	189.4	16.6	25.1	123.9	57.3	90.8	56467	781.2	223.4	110.2	4483	16479	19047	14
CHI-A002b	186.7	251.5	10.8	145.9	13	19.3	98.3	68.9	59.8	49332	638.1	215.4	95.4	4242	16821	18654	14
CHI-A002c	178.8	244.1	10.4	139.4	9.5	21.9	97.1	68.3	57.3	46319	576.2	222.7	101.4	4092	15681	17658	14
CHI-A002d	166.3	227.4	11.1	133.3	9.2	16.4	82.9	74.8	41.7	44299	551.2	208.1	99.1	4085	15636	17526	14
CHI-A003a	203.8	148.7	10.7	120.8	10.5	24.4	79.2	42.2	146.2	37194	525.5	241.1	120	4177	24543	18732	14
CHI-A003b	207	155.2	5	128.4	13	27.1	78.3	32.1	116	39644	515	166.7	127.5	4599	30446	20880	14
CHI-A003c	200.9	161.3	9.1	125.3	10.6	22.5	77.7	39.8	122.8	40519	590.4	185.2	118.9	4751	30528	21426	14
CHI-A003d	193.3	162.3	8.8	121.6	9	24.7	102.9	27.3	119.3	40865	488.4	136.9	114.6	3820	36152	17878	14
CHI-A003e	196.6	161	8	125.5	13.8	25.8	90.5	19.8	109.4	41401	475.5	182	131.6	4653	42654	21790	14
EPH-A001a	320.7	178.4	9.6	117.2	14	31.8	110.3	24.1	43.1	55952	522.8	117	100.5	4542	9577	15218	15
EPH-A001b	261.6	151.8	10.2	106.2	13.1	24.6	91.7	143.6	23.3	43910	398.6	146.2	144.9	5880	9983	18967	15
EPH-A001c	257.3	153.8	10.5	107.5	11.5	24.2	88.1	153.3	25.6	43751	393.5	134.8	148.5	5919	10052	18824	15
EPH-A001d	257	153.3	10.7	106	14	25.1	90.6	151.1	26.7	43747	388.7	136.4	133.4	5821	10005	18904	15
EPH-A001e	258.8	148.3	10.9	100.4	14	21.4	89.4	343	41.9	42372	416.5	136.5	129	5744	10641	17649	15
EPH-A002a	301.2	352.4	5	142.8	14.7	32.6	119	52.7	44.2	73599	586.6	129.3	100.5	3940	5304	13414	15
EPH-A002b	269.3	295.9	9.9	126.7	14.8	35	99.9	69.4	106.2	53593	749.9	157.9	155	6608	17187	22293	15
EPH-A002c	245	281.6	11.6	109.5	12.3	26.1	85.3	67.3	23	53515	418.5	172.6	164.9	6335	8147	21135	15
EPH-A002d	259.6	295.5	13.6	112.6	13.4	25.1	91.4	74.7	24.9	55525	407.4	153.6	166.3	6381	8415	21385	15
EPH-A002e	253.6	292.7	14.1	110.8	9.6	24.8	90.9	74.9	27.6	54944	360.9	153.6	173.3	6235	8225	21328	15
EPH-A003a	182.1	221.3	5.8	83.3	13.2	27.5	74	17.4	20	27526	418.6	72.1	59.1	2689	7959	13840	15
EPH-A003b	178.4	200.7	10.4	72.7	11.7	22.6	66.8	26.3	31.7	23695	458.7	57.8	100.3	3712	11111	19628	15
EPH-A003c	174.7	197.1	8.8	72.3	14.2	21.5	63.8	28.8	27.3	23135	443.6	78.2	97.1	3793	11041	20236	15
EPH-A003d	194.2	212.8	10.7	75.6	11.8	21.7	68.5	15.6	28.2	25666	443.5	79.9	78.2	3657	11247	19952	15
LEM-A001a	157.5	194.2	10.7	98.5	12	29.4	83.7	44.4	59.9	39427	535.2	141.6	92.3	3832	30202	15206	16
LEM-A001b	162.1	198.4	9.1	102.9	9.2	34.1	80.8	42.1	81.6	41162	651.6	144.7	85.7	3938	32981	15341	16
LEM-A001c	173.1	209.6	15.3	104.3	9	19	93.2	277.8	61.6	41630	582.4	121.4	131.3	5030	44021	19376	16
LEM-A001d	176.9	205.4	12.2	102.6	6.6	19.2	81.9	229.8	63.8	41774	551.7	133.6	135	4943	43871	19339	16
LEM-A001e	170.3	207.7	13.3	105.2	7.4	19.3	91.8	227.6	52.2	42257	549.4	143	142.4	4921	43451	19276	16
LEM-A002a	168.5	247.8	11.9	137.1	9.2	29.8	165.8	98.7	212	62003	1158.3	121.2	50.8	2187	23037	12155	16
LEM-A002b	137.2	208.8	12.6	111	6.5	20.3	129.1	72	128.2	48510	723.2	325.7	130.9	3875	35219	20104	16
LEM-A002c	138.1	206.8	11.8	106.1	6.5	21.3	121.5	70.5	123.4	48071	660.6	333.3	127.6	3994	36802	20935	16
LEM-A002d	152.1	219	11.8	122.6	4.9	24.6	136.8	78.8	152.8	54891	819.6	350.7	103.4	3791	34086	19601	16
LEM-A003a	172.5	296.8	10.7	132.4	5.2	31.9	129	82.1	143.1	59632	1074.7	221.8	97	3452	43431	19801	16
LEM-A003b	146.7	263.6	10.9	107.6	7.1	20.4	108.2	73.4	157.5	43971	848.2	197	124.1	4133	61861	23983	16
LEM-A003c	148.1	266	10.6	103.8	8	16.9	106	79.6	170.5	44068	806.4	196	125.7	4040	61792	23864	16
LEM-A003d	143.3	263	10	107.8	5.4	18.1	113.5	79	139.5	44325	875.8	196.4	138.6	4056	61958	23836	16
NIK-A001a	135.5	213.5	10.3	100.3	11.4	21	73	60.3	173.2	34248	726	224.4	78.5	3274	87696	18014	17
NIK-A001b	136.8	223.9	10.7	105.7	9.4	21.7	92.4	37.1	108.6	39411	763.5	161.5	74.3	2490	67303	13802	17
NIK-A001c	134.2	217.1	8.3	101.6	9.7	20.4	77.9	37.1	97.1	34905	732.6	192	66.9	2629	74628	15215	17
NIK-A001d	86.5	126.8	6.7	59.8	5.2	11.4	50.1	32.9	33.7	23321	246.2	213.8	68.9	2244	66365	12945	17
NIK-A002a	156.7	372.7	11.4	113.2	9.9	19.9	83.6	54.3	97.3	33364	605.7	215.4	89.5	2904	113572	19739	17
NIK-A002b	174.5	435	13.7	127.8	8.4	22.9	87.8	45.5	99.1	39711	716.8	201.1	72.4	2667	97887	17767	17
NIK-A002c	159.2	432.2	10.8	127.5	9.4	21.3	92.9	36.1	90.7	39142	666.2	170.5	63.1	2107	78008	13578	17
NIK-A002d	161.5	437.8	11.4	133.7	9.4	22.6	105.1	35.1	91.1	41414	741.8	184.2	74.3	2276	83155	15424	17
NIK-A002e	174.4	561.7	20	162.2	17.6	30.6	142.5	63.2	139.2	62630	1238.2	177.4	58.2	2155	78950	14438	17
NIK-A003a	147.1	365.2	15.6	141.4	11.9	21.7	76.7	39	101.2	29850	526.8	191.2	81.5	2832	94486	21995	17
NIK-A003b	135.7	381.1	15.7	154.7	11.6	20.5	78	35.5	93.2	32477	556.4	159.1	65.6	2424	80871	19141	17
NIK-A003c	137.3	383.1	19.7	160.7	13.9	18.5	80.8	41.3	86.7	33475	598.7	167	84.4	2614	84518	20907	17
NIK-A003d	148.9	398.2	15.4	180.3	15.6	25	93.6	43.4	79.6	40301	672.7	151.8	61.1	2230	73583	17306	17
NIK-A004a	168.8	440.5	12.8	127	11.5	28.3	95.4	38.2	123	40610	599.7	237.1	68.3	2726	84216	16279	17
NIK-A004b	170.3	378.1	11.2	105.3	9.8	21.4	71.2	49.2	106	31048	473.2	249.4	84.9	3243	101376	19968	17
NIK-A004c	173.1	378	11.3	105.5	11.9	16.8	77.4	47.2	114.7	31644	477.3	248.1	93.6	3378	102233	20093	17
NIK-A004d	171.4	380.4	14.9	107.1	10	21.2	77	49.6	97.8	31621	459.7	256.4	99.7	3265	101164	19538	17
THA-A001a	182.8	235.9	14.4	151.7	10.8	56.9	313.7	53.8	111	43999	735	127.3	105.6	3396	56696	19998	18
THA-A001b	193.9	242.9	10.1	160.8	12.4	58	346.4	36.3	20	49051	635.6	121.6	78.8	2547	38687	15214	18
THA-A001c	155.2	239.5	15.1	135.6	13.3	81.7	308.2	57.5	114.4	38736	644.6	157	91.9	4456	55956	25670	18
THA-A001d	158.6	212.1	15.6	138.1	9.6	39.9	283.9	48.4	67.1	38733	524.7	122.1	112.1	4310	65956	24623	18
THA-A001e	167.9	224.7	15.2	136.3	9.8	48.1	283.8	53.8	53.2	40656	513.4	108	112.7	3823	62703	23343	18
THA-A001f	170.9	214.2	14.5	137.8	8	48.2	293.6	57.5	69.3	40405	547.2	144.8	118	4124	62605	23919	18
THA-A002a	203.3	369.4	8.6	146	10.7	43.4	131.8	34.6	49	48460	640.4	120.2	88.6	3572	52236	19928	18
THA-A002b	179.7	337.8	14.7	124.3	10.9	60	135.7	50.1	86.7	36629	606.3	130	111.3	4125	99168	26728	18
THA-A002c	187.3	341.3	13.1	135.4	7.5	45.8	127.3	198.6	33.2	43202	663.7	98.8	92.2	3060	44519	16888	18
THA-A002d	188.3	344.4	15	130.8	9.9	43	121.6	139.7	34.4	40216	615.4	94.8	99.6	3693	55871	20969	18
THA-A002e	182.4	341.7	13.9	132	6.4	42.4	126.7	121.1	44.9	39994	542.6	103.7	108.6	4032	60980	22736	18
SAM-A001a	127.8	263.7	5	86.7	6.3	37.3	105.6	91.3	389.6	45927	962.4	477.6	60.8	2692	69323	12290	19
SAM-A002a	130.5	216	5	80.5	7	16.3	91.1	43.1	442.9	52132	750.8	566.2	70.5	3164	31569	12121	19
SAM-A003a	134.8	220.3	6.7	92.1	5.1	29.4	106.7	40.2	351	49612	701.1	400	55.1	2695	53431	11006	19
SAM-A004a	120.7	270.9	8.7	81.6	5.7	20.7	89.4	56.4	449.7	55924	791.1	654.5	77.3	3693	45375	14604	19
SAM-A005a	139.6	176.4	8.5	93.7	4	27.1	100.9	86.1	447.1	55922	773.4	627.7	93.4	3952	28597	16213	19
SAM-A006a	151.3	208.3	5	90.8	4.1	20.7	89.3	52.5	404.2	54113	663.1	591.4	97.2	3809	43229	15215	19
SAM-A007a	137.8	195.5	5	94.4	6.2	20.1	99.5	47	441.3	52140	683.5	479	60.3	2981	54273	12901	19
AEG-A001a	135.3	357.1	7.6	56.8	13.2	26.4	103.9	40.4	176.3	35224	644.2	187.3	78.8	3180	107626	14719	20
AEG-A001b	180.5	306.1	8.9	51.3	14.6	25.9	96.3	34.5	142.9	37417	729.6	152.6	106.8	3704	69590	12499	20
AEG-A001c	163.1	336.7	9.7	53.6	15.9	21.6	100.5	34.1	171.4	38088	649	181	82.5	3629	88445	14274	20
AEG-A001d	150.6	327.7	8.4	54	14.1	22.9	98.3	32.5	165.5	36893	652.6	166.1	99.9	3482	89413	14525	20
AEG-A002a	145.1	370.1	8.6	60.5	15.3	25.8	91	37.2	174.6	38281	728	182.5	80	3653	110288	16143	20
AEG-A002b	142.1	349	5	61.6	14.3	25.7	93.1	32.4	176	37011	640.7	160.2	90.1	3308	94449	14472	20
AEG-A002c	133.1	327.1	5	54.6	13.7	20	79.3	31.3	206.7	32844	658.7	135.4	69.3	2695	84963	12440	20
AEG-A002d	138.9	360.9	13	58.2	16.6	21.6	125.4	24.7	155.4	38744	647.5	137.3	70.3	3000	90106	13374	20
AEG-A003a	190.2	282.9	11.3	125.2	9.1	56.8	118.6	28	55.3	46537	280.3	188.1	127.4	4118	48144	17330	20
AEG-A003b	206	331.2	16.9	140.8	11.4	62.3	136.4	36.3	80.9	58082	357	154.8	97.2	3210	43814	14326	20
AEG-A003c	204.5	323.1	16.3	132.2	14.6	57.5	136.3	35.3	52.2	53187	326.2	149.3	108.4	3643	47879	15839	20
AEG-A003d	206.1	333.3	21.5	138.5	13.6	60.4	144.3	46.2	71.1	58619	358.9	145.5	89.9	2847	38902	12561	20
AEG-A004a	204.4	283.4	13.2	118.6	11.7	34.7	108.4	34.1	98.3	45048	411.4	152.8	131.5	4243	75380	20031	20
AEG-A004b	166.6	236.3	12.9	94.6	9	26.7	96.4	63.8	46.7	40174	258.1	218.1	124.2	3434	59088	15103	20
AEG-A004c	193.4	256.9	13.4	106	10.9	32.7	102.5	52.9	59.5	41994	289.3	166.5	125.4	4196	70328	18737	20
AEG-A004d	192.9	275.8	14.2	115.2	10	30.7	113.6	43.6	68.8	44463	376.4	166.3	139.2	4498	69112	19601	20
AEG-A005a	203.4	297.3	13	162.1	13.5	29.7	87.4	72.8	108.5	33825	472.6	174.4	86.2	3890	47695	20273	20
AEG-A005b	182.8	251.4	19.5	150.5	10.8	22.8	72.8	62.5	71.3	30938	387.8	165.6	117	4770	48172	23153	20
AEG-A005c	193.5	244.7	21.3	152.2	11.9	22.6	75.4	63.8	98.2	30045	417.9	147.1	121.2	4965	49769	24795	20
AEG-A005d	197.1	234.8	20.1	155.9	11.3	26.8	72.3	56.8	85.2	29117	437.7	155.6	115.8	5119	52028	25457	20
AEG-B001a	229.9	233	11.4	174.1	16.9	36.2	146.7	50.2	100.1	55919	755.2	92.5	50.7	1792	18749	10899	21
AEG-B001b	233.3	228.1	17.6	174.6	13.6	33.6	143.2	41.2	98.6	55307	760.5	99.9	79.1	2845	27601	16961	21
AEG-B001c	184.5	233.5	9.2	161.1	11.7	29.5	129.6	63.6	20	56112	654.7	114	78	3308	33969	20112	21
AEG-B001d	189.7	242.4	5	165.9	14.8	30.8	142	65	37.5	57247	654	98.1	95.5	3112	32943	19279	21
AEG-B001e	184.6	241.8	9.3	158.4	11.1	33.2	129.8	50.1	20	54213	704.3	110.1	76.8	3005	33759	18793	21
AEG-B002a	181.5	280.2	13.4	139.3	6.7	21.1	103.6	43.2	126	47724	732.3	150.9	93.5	3545	19000	16278	21
AEG-B002b	177	255.3	8	120.9	7	14.8	85	53.8	112.2	40403	586.9	201.2	123.7	5065	24721	21309	21
AEG-B002c	180.3	261.4	12.1	122.2	9.9	12.4	88.8	88	118.5	42754	639.8	214.1	129.6	4971	25138	21244	21
AEG-B002d	188.1	276.4	11.2	122.9	7.9	14.7	90.9	123.5	96.7	42234	615.7	186.8	140	5099	26083	20963	21
AEG-C001a	197.8	250.9	13.8	150.1	14.7	36.2	125.6	83	265.3	60066	1388.1	371.5	161.2	4878	60914	25499	22
AEG-C001b	190.5	251.6	12.7	144.5	13.5	38.2	116.5	93	176.3	62321	996.7	339.1	102.4	3933	45997	20025	22
AEG-C001c	190	260.4	5	153.7	14.3	34.5	122.2	97.7	173.5	63172	1106.6	336.5	118.3	4356	53157	22703	22
AEG-C001d	192	255.2	12.9	148.4	14.5	33.5	127.3	84.5	175.9	62771	988.9	339.9	113.6	3915	45879	20378	22
AEG-C002a	181.4	250.3	15.8	193.5	13.5	30.6	146	45.2	180.4	72052	980.7	270.6	109.9	3846	35467	20723	22
AEG-C002b	161	213.1	13.6	159.3	10.8	31.8	111.8	36.9	116.8	51097	544.9	223	90.8	3454	33228	18945	22
AEG-C002c	159.5	193.6	13.1	149.3	13.4	29	105.7	51.4	138.4	46456	514.2	241.1	127.7	4593	37617	25558	22
AEG-C002d	162	195.7	14.7	147.6	11.4	27.6	106.2	47.4	131.3	47502	540	284.1	141.2	4885	34600	25404	22
AEG-C002e	156.1	208.5	13.2	153.5	12.4	22.8	109.2	47.1	119.7	49273	604.9	229.2	100.8	3867	28328	20938	22
SIC-A001a	212	408.3	9.4	73.6	6.7	23	76.3	30.4	50.3	31810	282.6	63.7	83.8	3178	80020	11025	23
SIC-A001b	181.4	396.1	5	72.1	8.2	23.4	74	128.9	20	31431	217.2	76.8	92.4	3672	80371	12986	23
SIC-A001c	196.5	417.4	9.4	76	7	15	76	77.4	20	32865	262.1	70.4	98.1	3453	81897	12291	23
SIC-A001d	236.7	435.1	9	77.9	9.1	20.4	89.5	74.7	20	35010	273.2	58.5	80.5	3526	83495	12853	23
SIC-A002a	181.5	476.8	10.4	74.2	7.6	73.9	72.8	15	24.6	27019	85.4	47.4	87.2	3296	80688	15518	23
SIC-A002b	180	449.4	7	71.5	8.9	37	73.9	234.3	31.5	24938	96	54.5	108.1	3633	79392	16288	23
SIC-A002c	170.9	447.5	10.3	72.8	9.7	48.4	72.8	240.4	41.6	25627	110.8	62.5	101.4	3524	79420	16225	23
SIC-A002d	181.9	450.5	9.7	70.8	9.6	41.3	66.6	243	20	25014	115.3	38.2	107.6	3507	79014	15963	23
SIC-A003a	201.2	375.4	6.1	76.9	10	24.9	83.7	78.8	20	35143	210.8	60.2	90.5	2818	69879	9590	23
SIC-A003b	194.5	351.2	7.2	66.9	10	19.7	78.9	91.3	20	30882	230.8	96.1	65.4	2708	65707	9437	23
SIC-A003c	192	346.9	8.3	65	7.1	16.2	77.7	68.5	23.6	30132	206.5	45.5	82.6	3193	78901	10889	23
SIC-A003d	192.5	340.8	6.6	65.1	8.7	16.1	82.3	55.2	20	28875	184.9	55	87.8	3655	87395	12106	23
SIC-A004a	303.4	314.4	11.4	93.6	11.2	24.5	119.7	37.4	79.3	37996	299.8	84.3	85.8	3459	35176	11193	23
SIC-A004b	273.9	286.6	5.7	82.9	9.9	21.7	85.5	83.1	45.5	31826	188.6	93.1	101.2	4278	41192	13014	23
SIC-A004c	279.9	292.3	6.4	85.1	10.1	23	97.7	72.3	50.9	33899	182.2	94.4	107.1	4864	47270	14523	23
SIC-A004d	265.3	292.9	6.9	84.6	10.3	25.9	97.8	74.4	52.7	34414	206.1	92.8	120.1	4900	46760	14404	23
SIC-A005a	308.9	321.4	11.3	95.2	9.2	14.3	101.1	19.6	35.3	43235	151.1	97.2	94.3	3180	43699	9824	23
SIC-A005b	227.7	234.1	5	72.8	9.6	11.3	72.8	67.7	66.3	29273	120.6	90.7	92.6	3332	43845	11109	23
SIC-A005c	269.1	301.9	7.3	81.4	8.7	10.1	77.4	36.5	43.6	33952	217.5	71.5	92.7	4381	74861	14305	23
SIC-A005d	280.5	285.2	10.1	83.5	9.7	15.8	91.9	69.9	37.8	35396	222	103.4	104.8	3576	48050	10659	23
PAP-A001a	137	683	9.3	66.6	4.7	36	81	49.5	99	29862	611.5	145.8	68.4	2930	54571	12507	24
PAP-A001b	126.9	549.7	11.9	55	5	40.5	44.9	33.6	58.2	26095	449	322.5	37.8	3087	61715	10631	24
PAP-A001c	113.2	621	10.9	61.8	5	18	67.6	34.5	61.3	26733	486.1	184.4	95.5	2902	94101	13816	24
PAP-A001d	118.2	612.6	8.1	62.3	4.4	18.8	66.5	35.3	67.5	27696	506.7	323.3	72.7	2951	92902	14343	24
PAP-A001e	119.8	637.4	10.3	63.1	6.1	16.6	73.1	51.4	66.2	29549	543.9	305.2	86.5	2710	82824	13203	24
PAP-A002a	123.8	480.6	11.1	61.5	3	52	219.6	105.6	139.1	35051	1155.7	181	107.6	3614	65570	18638	24
PAP-A002b	114.9	431	10.3	59.3	6.3	49	156.4	72.3	126.8	32268	711.1	215.1	81.2	3180	43604	15281	24
PAP-A002c	115.2	558.1	8.5	59.8	4.2	16.8	176.7	80.1	62.8	27918	636.2	105.1	75.5	2703	138152	17613	24
PAP-A002d	113.3	580.3	10.8	58.3	5.6	12.8	144.9	70.5	78.2	25193	598.6	87.8	63	2591	151477	18386	24
PAP-A002e	112	567.3	9	56.4	5.7	11.5	145	67.2	63.3	24983	637.3	73.5	87.1	2570	149472	18524	24
PAP-A003a	154.9	553.5	14.5	61	7.4	42.3	72.4	106.5	118.6	36045	547.7	179.9	85.5	3863	91925	17661	24
PAP-A003b	134.8	551	13	59	7.8	34.6	70.1	115.3	119.2	34369	731.5	291.7	91.7	3635	72313	17011	24
PAP-A003c	119	459.5	12.7	50	10.5	17.5	58.9	83.7	67.6	36908	375.2	91.3	68.5	2459	113470	12562	24
PAP-A003d	118.4	512.4	10.6	53.3	5.8	16.4	76.3	111	81.5	42931	398.7	80.8	81.7	2564	125814	13739	24
PAP-A003e	123.4	508.3	7.6	56.6	3.6	18.1	75.8	116.8	73.4	43675	409.9	106.8	74.3	2564	121898	13598	24
PAP-A004a	113.7	373.3	7.6	56.9	6.2	14.5	546.8	68.1	107.7	28411	412.2	131.2	92.6	2702	127095	15262	24
PAP-A005a	156.8	581.9	9.6	70.2	6.4	19.5	77	20.7	97.4	33709	459.4	220.2	70.7	3045	116550	14176	24
PAP-A005b	111.8	479.2	8.9	52.3	5.5	14.3	50.1	24.6	53.8	24729	335	107.5	72.8	2637	109694	11494	24
PAP-A005c	127	524.2	9.2	60.1	4.6	14.7	67.9	31.9	70	29093	346.3	587	70.5	2754	105348	12741	24
PAP-A005d	126.9	532.6	11	60.9	6.4	14.4	70.1	34.6	67.9	29404	370.6	724.4	73.7	2998	106967	13758	24
PAP-B001a	148.4	246.5	8.8	68.1	6.9	54.1	93.3	97.9	235.3	46754	1233.8	428.2	68	4009	70053	12464	25
PAP-B001b	146.7	220.9	11	64.2	5.9	73.8	93.5	87.8	233	49190	901.9	392	71.7	4354	34907	10101	25
PAP-B001c	143.5	281.7	10	71	7.1	36.9	98.3	68.5	216.1	45465	932.5	562.6	105.9	4569	61727	15179	25
PAP-B001d	137.7	271.8	9.8	66.6	6.1	34	98.6	66.4	188.4	43629	848	891.6	106.6	4524	61076	15150	25
PAP-B001e	144.7	269.4	8.8	70	5.1	38.7	100.7	81.6	190.5	45695	960.5	1066.3	96.4	3863	54040	13528	25
PAP-B002a	160.9	503	7.2	78.8	7.2	32.5	451.4	90.1	176.9	41946	964	168.9	86.2	4240	106680	15852	25
PAP-B002b	143.8	322.1	9.1	66	7.6	48.6	331.1	103.4	219.2	43087	1018.2	341.7	98.7	4372	95682	16374	25
PAP-B003a	166.2	413.2	10.1	90.2	10.4	36.1	115.2	102.6	195.7	53843	986.8	379	90.1	3598	70778	13768	25
PAP-B003b	146	372.8	10.4	69	7.6	38.3	91.1	143.2	206.4	40069	795.1	204.9	88	4002	70050	14381	25
PAP-B003c	146.3	427.4	11.1	69.5	8.5	26	90.6	117.1	163.8	41265	643.5	633.1	104.5	4635	82336	15717	25
PAP-B003d	144.7	410.9	9.9	67.9	4.5	24	89.8	102	164.1	38377	640.6	468	112	4130	78737	15578	25
PAP-B003e	136.9	405.2	10.6	71.2	6.9	24.3	93.2	112.2	248.9	43020	737.9	1675.3	96.9	3936	75635	15339	25
PAP-B004a	165.1	396.4	9.8	84	6.4	26.7	79.8	88	120.2	41969	767.2	323.5	112.7	4706	77401	17211	25
PAP-B004b	148.4	435.6	11	76.3	3	39.7	92.9	134.3	223.4	44601	916	485.7	84	3751	64612	14355	25
PAP-B004c	158.3	430.4	8.7	76.2	6.7	38.2	87.4	123.2	167	43124	878.6	189.4	80.6	3582	59510	12464	25
PAP-B004d	166.1	446.6	7	83.3	6.5	34.9	94	135.7	175.9	45637	950.3	227.2	65.5	3506	55887	12422	25
PAP-C001a	105.3	512.8	9.6	56.3	3	58.7	99	78.5	116.9	48230	782.8	209.4	89.8	2692	74118	13183	26
PAP-C001b	118.1	506.5	10	53.9	5.8	64.1	94.8	73.9	142.5	45394	912.2	135.7	55.4	1811	49419	9102	26
PAP-C001c	116	495.4	10.8	57.8	3	40.8	83	86.4	65	48518	675.1	383.8	100.6	3321	73761	14990	26
PAP-C001d	101	470.7	7.4	54.8	3	40.3	78	90	71.3	42042	615.4	301.4	105.8	3407	74368	15134	26
PAP-C001e	97.7	447.1	9.8	49.2	3	33.6	74.5	81.5	72.1	39668	598.5	153.2	103.5	3366	75980	14901	26
PAP-C002a	95.8	335.8	7.6	50.8	4	25.4	80.7	65.1	121.7	47781	935.9	109.1	92.2	2404	64144	8903	26
PAP-C002b	92.4	301.2	5.7	7.9	3	26.9	93	43.8	114.5	39324	1186.2	77	71	1950	202729	8035	26
PAP-C002c	110.9	448.1	9.9	61.5	4.1	18.3	96.3	55.1	190.2	43654	707.6	233.3	89.4	2647	93618	11171	26
PAP-C002d	106.4	411.5	7.7	56.6	4.9	16.6	88.8	59.3	177.7	40763	639.6	392.9	92.6	3204	106093	13200	26
PAP-C002e	114.9	446	7.8	57.9	4.6	46	121.2	79	164.8	42218	784.7	216.3	96.1	3258	95819	13277	26
PAP-C003a	118.1	587.3	6.3	50.4	3	25.9	104.3	73.9	127.8	43774	622.7	164.2	116.4	2819	108722	11496	26
PAP-C003b	97.4	507.7	7.1	46.1	3	32.8	96.9	73	67.9	43911	528.2	198.6	139.5	3250	94584	12857	26
PAP-C003c	92.9	500	5.9	44.2	3	31.5	95.9	68.4	57.2	38775	509.7	218.2	105.3	3088	103522	12913	26
PAP-C003d	101.2	564.8	9.3	47.2	3	28	105.2	78.6	88.4	43861	575.4	205.4	147.1	3705	118698	14949	26
KOU-A001a	125.5	641.9	5	24	3	26.7	56.1	65.8	143.7	43489	1404.4	386.3	124	3860	113797	12556	27
KOU-A001b	96.8	543.8	5	17.6	3	9.5	38.2	68.3	32.6	37644	464.2	236.9	84.8	2172	83828	4457	27
KOU-A001c	90.8	558.8	5.7	16.5	3	5.8	49.9	43.2	41.2	37657	416.8	235	112.2	3117	123112	6101	27
KOU-A001d	94.6	655.6	5	19.7	3	7.2	44.2	62.6	48.5	39608	449.1	183.4	115.1	3225	142426	6384	27
KOU-A002a	82.3	589.6	5	18.7	3	7.9	71.6	52.9	94	42928	436.2	755	140	3301	160253	6349	27
KOU-A003a	112.8	493.2	5.2	19.2	3	72.3	67.3	95.3	188.7	70974	2353	646.3	187.6	5261	30612	8524	27
KOU-A004a	102.4	638.7	5	22.4	3	12.9	45.6	75.4	121.5	51189	824.9	294	144	4181	135117	7692	27
KOU-A004b	64.6	417.1	5	16	3	5.2	35.4	62	32.7	39787	496.6	549.4	98.9	2794	96838	5563	27
KOU-A004c	88.2	520.8	5	19.8	3	11.3	43	74.5	76.8	47470	676	673.2	93.5	3217	105187	6267	27
KOU-A004d	101.6	562	5.4	21.9	3	14.3	48.2	84.3	79.8	52480	755.7	464.6	107.9	3140	103612	6364	27
KOU-A005a	100.7	596.4	5	16.5	3	18.6	50.7	52.5	99.9	49636	776	381.8	128.3	3356	126342	7020	27
KOU-A005b	89.4	528.5	6.7	16.3	3	13.4	82.1	97.7	140.2	55822	1134.4	461.4	147.5	4442	49900	7478	27
KOU-A005c	96.7	572.2	5	16.5	3	34.4	57.1	83.4	63.4	53230	846.6	327.3	106	2794	85012	5012	27
KOU-A005d	92.9	582.5	5	18.3	3	31	57.1	87.1	57.1	53332	810	322.2	114.3	3154	96313	5405	27
KOU-A005e	91.4	581.7	5	17.9	3	37.1	53.5	84	58.4	51499	767.4	271.4	102.7	3038	98194	5377	27
KOU-A006a	158.6	688.7	6.9	56.9	5.9	19.8	74.3	84.4	98.2	55141	602.8	94.1	90.5	2254	63908	7452	27
KOU-A006b	171.7	725.6	7.2	59.6	3	59.8	74.3	93.8	95.8	63603	588	120.3	117	2985	79633	9952	27
KOU-A006c	175.6	767.9	7.3	57.5	3	15	74.2	96.2	71.1	55061	568.9	272.2	139.4	3364	95376	11152	27
KOU-A006d	174.1	753.5	7	58	3	14.9	78.9	97.3	61.8	56618	708.6	239.5	127	3125	93497	10329	27
KOU-A006e	172.8	726	8.5	56.6	3	12	70.3	99.3	85.8	52876	787.1	242.4	125.6	3420	91501	11012	27
KOU-B001a	219.1	327.5	10.2	70	7.2	20.8	83.4	51.6	112	51961	1341.1	227.7	120.4	4160	74987	13425	28
KOU-B001b	171.9	282.6	7.4	62	4.1	29.1	78.6	45.3	69.5	48986	1169.8	256.6	120.8	4358	66098	13092	28
KOU-B001c	165.1	271.8	6.9	57.4	3.9	30.9	81.3	43.3	73	46811	1101.3	230.8	125.7	4251	66111	12777	28
KOU-B001d	151.9	256.7	5.3	55.5	4.3	25.9	77.3	46.4	57.4	44847	964.1	264	123.4	4057	58530	11987	28
KOU-B001e	154.3	255.7	5.1	56.9	3.8	26.1	70.7	49.8	66.2	45115	1018.7	258	116.5	4032	58349	12107	28
KOU-B002a	187.2	431.4	10.4	67.5	7.3	31.5	80.3	78.7	144.6	50878	1181.3	213.7	81.2	3247	62815	11269	28
KOU-B002b	160.6	396.9	6.2	59.1	5.6	15.5	71.3	142.3	78.9	41129	837.5	454.6	103.5	3554	76505	12387	28
KOU-B002c	155	398.2	7.8	57.3	5.9	18	62.4	160.2	93.6	41231	812.7	425.8	91.2	3455	77977	12003	28
KOU-B002d	161.6	415.1	9.4	59.9	5.1	17.4	72.9	172.1	92.2	41257	869.8	325.5	104.6	3424	77375	12131	28
KOU-B003a	235.9	343.9	5	65.8	7	22.9	98.4	53.1	138.2	53111	1383.8	621.5	98.5	3764	55932	10938	28
KOU-B003b	230.4	374.5	5	69.6	6.9	23.4	105.1	68.5	107.7	57238	1332.1	727.8	69.8	2415	36947	7265	28
KOU-B003c	226.1	375.9	5	71	7.6	23.6	108.9	58.5	89	57900	1431.3	835.3	85.5	2640	39807	7822	28
KOU-B003d	218.7	362.1	5	68.5	5.1	20.1	99.7	59.3	73.1	54246	1235.4	506.8	62.6	2203	33444	6749	28
KOU-B004a	186.1	591.1	6.8	44.2	5	23.5	79.8	51.3	118.2	48069	1133.9	613	100.6	3388	28234	8062	28
KOU-B004b	139.7	501	6.6	34.8	3	12.1	61.8	56	59.6	40809	551.9	203.8	129.8	4392	39506	10601	28
KOU-B004c	140.4	515	5.1	36.2	3	11.5	72.8	61.9	58.1	41238	638.1	391.6	120.7	4599	42735	11236	28
KOU-B004d	133.6	514.2	5.8	36.1	3	12.3	71.4	76.7	57.8	42858	678.3	502.1	110.9	4493	38351	10565	28
KOU-C001a	100.5	404.1	5	56.2	3	20.3	105.6	70.9	124.1	63269	1590.8	160	130.2	3308	109952	13821	29
KOU-C001b	88.6	319.2	10	46.5	3	38.7	82.9	94.1	129.2	48439	1389.8	138.3	89.2	2812	99139	11526	29
KOU-C001c	71.2	309.4	5	38.3	3	9	66.9	194.9	83.4	41347	1164.7	174.6	87.2	2701	94825	11584	29
KOU-C001d	76.4	319.6	5	40.6	3	12	77.2	177.9	95.7	42253	1181.9	139.1	99	3053	107924	12849	29
KOU-C001e	82.5	327.3	5	42	3	9.8	80.2	126.6	89	46121	1204	160.1	112.1	3241	119567	13870	29
KOU-C002a	90.1	458.9	5	42.1	3	14.3	121.4	122	36.5	57504	986.8	124.9	118.1	2645	88339	9436	29
KOU-C002b	85.3	413.4	5	36.3	3	10.2	86.1	93.1	50.9	45915	895.5	187.4	92.7	2484	82864	8692	29
KOU-C002c	90.3	444.5	5	40.5	3	18.5	92.5	113.3	74.2	50204	941.9	126.2	103.9	2914	100274	10473	29
KOU-C002d	92.3	439.1	6.4	38.3	3	20.4	92.2	119.5	46.4	47287	929.8	122.6	132.3	2741	94326	10040	29
KOU-C002e	75.8	407.4	5	34.2	3	17.2	84.3	105.7	54.6	43688	869.2	184	96.8	2386	85063	8692	29
KOU-C003a	102.4	438.3	5	32.2	3	63.7	105.5	127.4	95.1	54463	1091.5	242.3	103.1	3369	38436	10292	29
KOU-C003b	102.8	436.4	5	33.8	3	28.3	110	92.7	108.4	55234	1382.4	187.3	122.9	3439	50321	15498	29
KOU-C003c	100.1	500.6	5	34.3	3	13.7	115.8	168.8	83.3	50488	1426.4	242.5	107.2	3089	106044	10859	29
KOU-C003d	99.3	470.7	5	31.9	3	19	113.3	163.4	89.6	52091	1334.4	215.1	120.9	2943	97343	10219	29
KOU-C003e	99.2	506.3	5	31.6	3	17.8	114.2	178.1	83.3	50760	1473.8	233.9	128.4	3142	106739	10860	29
KOU-C004a	87.4	448	5.7	30.7	3	9.4	97.4	74.9	76.8	40479	638.7	70.2	100.4	2155	89853	8345	29
KOU-C004b	73.9	472.8	5	32.1	3	7.7	88.8	80.6	45.1	42975	651.2	80.9	93.5	2615	106854	10008	29
KOU-C004c	78.4	470.4	6.9	34.7	3	9.3	105.3	88	47.2	46065	838.2	59.5	110.1	2723	105443	10622	29
KOU-C004d	86.6	483.8	5	36	3	10.8	95.1	84	44.3	47352	690.8	74.3	118.4	2842	100882	10571	29
KOU-D001a	155.6	306.4	5	45.1	3	50.3	103.2	83.3	61	55551	1049.3	83.4	122.9	4130	47554	10511	30
KOU-D001b	127.4	240.4	6.4	36.1	3	22.4	91.2	77.5	20	45783	873.1	147.8	71.1	2285	24826	5847	30
KOU-D001c	131.6	257.9	5	40.6	3	25.8	87.9	100.7	28.2	52189	1059.5	137.6	116.7	3315	35620	8296	30
KOU-D001d	134.2	272.6	5.8	43	3	29	110.8	96.9	33.3	56548	1166.1	156.3	116.1	3601	38811	8996	30
KOU-D002a	122.3	507	5	40.9	3	15.5	59	69.8	65.9	42641	634.6	64.7	74.2	2056	83074	7350	30
KOU-D002b	133	554.3	5	41.3	3.9	19.1	67.1	107.8	103.3	48159	1963.3	64.9	91.9	2300	98649	8540	30
KOU-D002c	103.9	414.9	5	31.7	3	32.2	53.8	172.1	87.2	39634	3144.3	128.4	94.6	2084	74296	7251	30
KOU-D002d	122.6	508.9	6.4	37	3	47.5	59.1	265.1	62.3	45251	1587	163.5	120.6	3032	108399	10087	30
KOU-D002e	116.4	523	8	39.5	3	72.3	69	256.9	50	47595	1492.6	175.8	102.1	2674	101159	9548	30
KOU-D003a	118.8	336.5	5.2	29.2	3	9.4	61.3	116.7	80.1	47177	743.5	101.4	106.5	3211	97985	8482	30
KOU-D003b	118.1	349.2	7.1	30	3	12.1	65.7	118.2	87.7	47656	778.7	94.2	134.7	3298	106019	8844	30
KOU-D003c	102.8	333.2	5	26.1	3	14.4	66.4	138.8	67.5	44712	824	96.3	129.7	3192	98712	7981	30
KOU-D003d	104.3	350.5	6.8	27	3	9.6	61.2	147.5	62.8	45769	960.2	75.2	139.3	3163	100777	8176	30
KOU-D003e	106.8	359.7	5	28.6	3	11.2	60.6	131.4	57.7	45867	790.6	88.4	116.7	3115	104861	8442	30
KOU-D004a	166.4	412.5	7.5	43.9	3	17.5	80.6	86.2	81.7	52952	857.5	78.8	113.1	3063	77159	7580	30
KOU-D004b	152.2	382.6	5.8	40.3	3	18.5	67.9	214.8	71.6	51597	605.1	107.7	129.4	3857	71596	8874	30
KOU-D004c	155.5	375.9	5	39.5	3	22.7	71.1	258.5	65	52395	721.7	115.5	139.7	4356	77861	9532	30
KOU-D004d	152.6	394.9	5	41.9	3	20	67.7	188	55.2	52223	809.2	132.6	148.6	4129	79563	9388	30
KOU-D005a	156.2	364.7	5	52.5	3	20.5	93.1	69	87.8	60203	1091.8	244.6	106.2	3179	51508	8953	30
KOU-D005b	110.1	273	5.9	37.4	3	13.6	63.5	149.9	41.8	42731	578.6	229.4	108.3	3704	57060	9794	30
KOU-D005c	143.2	355.8	7.3	49.6	3	19.9	89.2	177.8	43.8	60155	709.2	312.4	151.9	4191	77837	11660	30
KOU-D005d	141.9	360.5	6	49.6	3	18	100.9	183	39.7	60836	786.5	375	137.1	4258	78699	11740	30
KOU-E001a	94.9	155.8	5	28.7	3	13.7	61.8	149	78.7	68514	771.6	87.6	160.1	4060	33710	8114	31
KOU-E001b	78.3	130.9	5	26.5	3	6.1	63	163.6	20	68936	584.5	453.9	139.1	3304	28464	7240	31
KOU-E001c	76	128	5	24.1	3	8.4	60	147.4	40.8	66964	534.8	617.8	154.3	3984	35244	8333	31
KOU-E001d	78.7	129.8	5	25.8	3	7.7	60.8	137.1	20	62408	533.9	773.2	134.5	3708	27993	7345	31
KOU-E002a	118.3	214.6	6.4	40.8	3	14	76.6	157.7	79.3	65063	841.8	128.4	147.1	4008	58816	9621	31
KOU-E002b	120.7	202.2	5	36.3	3	12.7	67.6	152.8	58.6	62407	782.8	226.5	134.4	3901	58365	9100	31
KOU-E002c	118.7	197.6	5	37	3	10.5	65.7	148.7	57.4	62396	731.6	218.4	131	3794	57776	8668	31
KOU-E002d	121.6	203.7	6.7	36.7	3	12.2	69.4	158.1	60.2	61626	766.6	199.1	138.5	4245	62450	9595	31
KOU-E003a	100.9	178.3	5	32.6	3	12	70.3	137.6	70.2	59815	682.3	111.7	113.9	3135	47287	7355	31
KOU-E003b	81.1	163.6	5	29.8	3	7	59.5	138.7	20	55699	545.3	120.4	119.9	3371	51163	7282	31
KOU-E003c	90.7	174	5	33.5	3	8.5	66	139.2	24.7	62815	608.1	98.5	147	4000	57547	8735	31
KOU-E003d	99.1	161.3	5	29.6	3	9.7	61.2	128.3	34.4	57946	555.3	88.2	148.8	3939	52978	8603	31
RBW-A001a	151.6	266.5	8.5	66.9	7.8	19.5	115.5	72.8	44.8	56702	653.5	129.3	112.4	4166	25087	10682	32
RBW-A001b	125.1	223.2	7.1	55.1	3	14.4	103.4	75	20	51173	934.9	143.3	99.4	3854	23966	9276	32
RBW-A001c	135	226.2	8.1	58.9	3.5	18.3	108.2	79.7	20	51333	730	134.7	127.9	4933	29768	11828	32
RBW-A001d	128.1	236.9	7.4	57.2	6.3	15.9	104.2	75.3	20	50350	614.7	145.4	152.9	5342	30272	12616	32
RBW-A002a	169.6	167.7	6.9	54.5	7.1	23.3	100.7	62.5	53.9	49701	2712.1	126	114.6	5067	21252	8722	32
RBW-A002b	176.1	178.2	6.1	58.8	10.2	27.2	111	69.2	44.5	53981	475.3	143	145.4	5733	22357	9967	32
RBW-A002c	169.4	168.6	5	55.9	6.9	26.1	108.1	63.4	20	55077	440.1	113	122.2	5607	15870	9132	32
RBW-A002d	172	173.3	5	57.6	8.1	25.3	107.4	73.7	20	56354	563.9	117	123.2	5806	15931	9349	32
RBW-A002e	179	174.2	5.6	61.6	8.9	27.8	123.6	79	20	60845	692.6	130.3	132.3	5250	14786	8922	32
RBW-A003a	192.3	207.7	8.1	75.9	10.2	23.8	117.9	84.7	37.1	67706	893.9	148.2	152.8	6303	11250	12366	32
RBW-A003b	165.2	189.8	6.2	65	9.6	22.2	110.7	92.3	23	62008	701.5	150.9	169.1	6855	11246	11795	32
RBW-A003c	167	192.9	8.4	67.1	7.6	24.4	109.5	97.3	45.6	64475	825	169.7	190.7	6620	10827	11943	32
RBW-A003d	164.9	193.9	9.5	63.8	6.5	21.7	103	83.7	31.8	62300	897.6	133.1	164.8	6561	11228	11648	32
RBW-A004a	193.4	239.9	11.7	74.4	7.3	31.2	127.1	66.3	46	64588	887.9	139.4	140.4	5781	36477	10767	32
RBW-A004b	109.5	172.3	8.3	46.4	4.7	19.5	105.6	77.4	20	50780	900.2	121.5	129.7	4796	32632	9303	32
RBW-A004c	96.3	145.4	5	43	3.3	13.6	89.9	67.2	20	45011	633.6	132	118.5	5112	33318	9542	32
RBW-A004d	82.3	113.5	5.3	34.3	3	10.3	78.4	53.9	20	39032	555.8	166.1	125.7	4758	28825	9370	32

## Sheet: Synthetic Training Data (cov)
SAMPLE	Zr	Sr	U	Rb	Th	Pb	Zn	Cu	Ni	Fe	Mn	Cr	V	Ti	Ca	K	CLUST
KOS-A_1	225.3	345.7	12.2	97.7	24.4	27.7	82.5	34.4	200.7	28970	332.7	260.5	69.4	2904	71249	19197	0
KOS-A_10	229.1	363.9	12.8	130.3	25.4	48.2	78.2	36.2	206.1	31202	395.1	194.1	81.8	2627	74935	20756	0
KOS-A_100	236.6	391.5	13.4	130.8	21.5	46.2	70.5	20	192.1	32681	403.2	190.3	74.1	2957	59577	19521	0
KOS-A_1000	250.8	422.2	21.8	123.2	22.9	39.2	70.7	29.2	168.4	34119	408.2	237.5	74.1	3192	62349	19159	0
KOS-A_101	231.8	369.9	20.6	131.5	23.9	37.4	70.8	16.7	173.3	32440	402.8	188.6	63.9	2653	83745	21230	0
KOS-A_102	241.8	337.2	18.9	151.9	24.1	56.8	81.1	42.8	200.5	36191	305.5	197.1	93.8	3336	23067	22737	0
KOS-A_103	255.8	410.3	17.5	132.8	21.9	44.1	81.5	17.4	162.5	33642	316.5	245.3	71.6	3601	56014	23706	0
KOS-A_104	227.4	354	10.1	103.2	20.5	51	75.8	41.4	255	34791	347.9	316.8	95.2	3558	65883	21774	0
KOS-A_105	253.5	365.7	24.7	158.5	26.5	50.6	88	26.5	161.8	33835	298.7	190.4	91.9	3384	58761	25771	0
KOS-A_106	214.2	359.1	14.3	106.8	22	17.5	68.4	17.7	180.5	30230	333.3	253.2	80	2701	73312	18826	0
KOS-A_107	252.8	408.4	18.6	130.6	24.5	45.4	73.1	39.9	230.2	36504	393.3	248.4	76.2	3266	62398	21025	0
KOS-A_108	252.6	375.5	19	139.7	28.3	31	90.6	31.6	189.7	35366	338.8	210.8	58.8	2649	63603	18965	0
KOS-A_109	241.9	425	17.8	127.2	22.4	37	77.4	27.3	188.9	35418	364.1	249.8	79.3	3065	83453	22189	0
KOS-A_11	254	385.5	14	129.9	25.3	50.6	85.9	31	205.2	35009	356.8	212	57.4	3209	51435	20333	0
KOS-A_110	234.8	315.2	25.7	162.2	27	59.6	99.4	32.7	161.9	36415	287.4	168.8	116.3	3878	34945	28776	0
KOS-A_111	219.8	350.8	15.6	99.2	23.4	31.7	79	40.9	201	29581	419.8	267.7	66.2	2599	86148	17373	0
KOS-A_112	225.5	319.3	17.1	137.6	25.1	55.4	84.8	22	217	33218	448.4	171	70	2898	56637	20958	0
KOS-A_113	228.1	362.8	10	122.2	28.4	32.6	94.9	38.2	220.6	32077	389.2	256.4	81.8	2609	76692	18567	0
KOS-A_114	244.1	367.4	16.6	120.1	22.7	43.7	72.2	18.6	182.4	31789	390.4	241	81.4	3389	62507	21261	0
KOS-A_115	211.8	339.9	13.6	110.8	25.1	39.2	77.6	24.9	199	30996	412.8	240	63.6	2752	56520	18350	0
KOS-A_116	229.9	342.4	17.4	144.3	27.2	33	79.5	30.8	195.9	34773	449.3	215.8	81	2983	60369	21989	0
KOS-A_117	231	399.6	14.5	130.8	22.4	39.7	76.9	40.2	199.4	34412	364	257.7	103.5	3491	85261	25828	0
KOS-A_118	240.8	363.3	17.9	129.5	25.5	56.1	86.3	28.4	202	33269	398.4	228.4	82.1	2990	69637	21623	0
KOS-A_119	246	403.2	21.8	157.9	26.7	45.9	98	33.3	206.3	38029	431.2	229.3	100.6	3663	75742	27806	0
KOS-A_12	237	394.2	17.7	135	24.2	48.4	72.5	40	214.5	32607	375.7	232.2	87.2	2972	72077	22427	0
KOS-A_120	254.1	435.7	21.6	117.6	21.6	46	73.8	33.5	160.9	32373	290.7	215.6	84.7	2934	70497	18662	0
KOS-A_121	224.1	347.8	13.5	138	21.7	47.5	80.3	23.2	191.9	33856	330.4	241.6	88.7	3222	57795	23677	0
KOS-A_122	251.1	357.2	18.9	146.8	26.3	46.1	74.1	22.8	166.7	36242	267.1	169.8	88	3186	33173	20967	0
KOS-A_123	227.1	405.4	21.7	135.4	23.3	40.2	80.5	24.1	191.7	34054	248.9	174	82.3	2990	58941	23386	0
KOS-A_124	247.5	360.3	9.3	108	23.1	42.5	73.7	20.7	213.1	31542	364.4	244.4	85.4	3126	61654	18369	0
KOS-A_125	203.1	278.3	20.6	143.1	26.2	38.5	85.2	37.5	183.9	32324	292	209.5	98.8	3150	49076	25859	0
KOS-A_126	259.9	362.4	24.5	164.8	27.8	53.5	88.2	30.7	177.2	37495	391.2	192	97.9	3502	60950	27087	0
KOS-A_127	240.1	326.8	11.4	128.6	25.7	35.5	80.9	30.4	197.7	33184	377.6	265.7	81.9	3020	64164	19811	0
KOS-A_128	236.1	343.6	17.1	137.4	22.8	36.2	84.7	27.6	201	34945	432.6	256.8	69.5	3252	40714	22549	0
KOS-A_129	221.4	371.7	20.9	141.1	29	35.3	91.6	36.9	176.4	37798	371.6	250.3	83.8	3148	69992	24684	0
KOS-A_13	254.6	335.9	17.8	160.6	25.3	55.3	84.9	23.7	164.9	33975	283.4	209.3	91.2	3536	28497	25993	0
KOS-A_130	227.3	353.4	17.8	110.8	22.7	59.9	85.7	38.8	166.4	31134	396.1	268.5	98.9	3812	76967	24364	0
KOS-A_131	215.3	380.5	13.3	107.8	24.5	36.7	83.4	25.4	181.1	31438	280.8	207.5	88.4	3041	73994	20607	0
KOS-A_132	226.1	367.3	18.7	125.1	27.4	39.9	83.8	39.8	170.9	32668	275.3	179.6	86.6	2918	71164	22326	0
KOS-A_133	224.9	411.7	12.7	126.4	19.7	41.7	74.5	13.1	183.3	32158	434.8	239.7	77.9	3049	76429	21966	0
KOS-A_134	227.2	387.9	16.8	135.8	22	45.4	79.8	33.1	184	31460	205.8	188.3	80.1	3052	51348	23646	0
KOS-A_135	216.5	384	12.1	123.3	25.4	32	73.8	16.7	200.6	33525	478.2	184	70.7	2557	70388	18652	0
KOS-A_136	268.8	380.1	22.6	167.3	27.3	61.2	88.8	31.7	200.2	36168	518.8	225.8	94	3197	79157	25404	0
KOS-A_137	242.1	352.6	20.2	138.3	27.1	41.2	89.6	33.7	200.9	36247	408.2	238	91.4	3570	73690	24390	0
KOS-A_138	249.1	401.5	18.5	111.4	24.8	48.2	85.6	25.9	200.8	34250	274	234.3	102.7	3442	93585	23319	0
KOS-A_139	240.1	385.2	12.6	124.5	25.7	42.5	72.9	32.2	207.5	33176	472.9	232.6	67.1	2810	77028	18870	0
KOS-A_14	231.4	342.2	15.9	148.3	27.1	48.1	91.8	37.5	199.1	34667	403	234.1	86	3413	55068	26225	0
KOS-A_140	218.5	358	9.5	116.7	23.9	44	84.2	47.1	203.4	31697	428.8	257.5	88.5	3409	68986	22476	0
KOS-A_141	203.6	295.3	10.2	123.7	23.6	50.3	78.3	42.8	154.6	29582	418	195.1	77.3	2957	44344	20221	0
KOS-A_142	196.7	326.9	12.7	111.1	22.6	30	68.8	18	165.7	27936	353.5	164.9	68.2	2541	75126	18147	0
KOS-A_143	224.1	351.3	13.4	113.7	24.8	34.2	78	36.7	165.6	32761	278.1	309.8	82.5	3279	64325	20836	0
KOS-A_144	229.9	382.5	17.4	127.4	23	39.8	87.6	45.3	215.5	36706	411.9	299.8	96.5	3861	61447	24871	0
KOS-A_145	254.6	435.1	20	146.8	24.8	54.5	77	32.6	199.7	36201	399	250.5	101.8	3629	75097	26907	0
KOS-A_146	226.2	334.4	17.9	151.9	27.5	41.6	92.9	26	221.4	37968	504.9	238.2	94	3274	65828	24522	0
KOS-A_147	224.7	356.3	16.8	116.3	25.6	45.6	83.5	17.3	171.5	32701	341.5	124.4	86.2	2944	41819	17708	0
KOS-A_148	255	394.3	21.1	138.4	25.2	50.4	90.8	23.8	171.7	34166	467.7	251	79.7	3206	80535	23586	0
KOS-A_149	217.4	353.4	16.2	124.5	22.2	38	77.8	34.9	202.7	31900	399.9	261.3	99	3055	71784	21180	0
KOS-A_15	253.1	426.4	15.5	134.7	25.2	42	80	32.2	202.1	33811	364.2	249.4	77	2916	69742	21758	0
KOS-A_150	226.7	370.6	17.2	147.1	26.9	53.3	81.6	30.6	176.4	33385	346	142.4	90.9	2701	57809	20907	0
KOS-A_151	228.8	427.8	13.8	109.3	20.8	38.7	67.3	9.8	178.7	31247	352.9	182.4	55.2	2211	85428	15775	0
KOS-A_152	233.8	317.2	16.1	137.7	27.7	43.1	94.1	31.5	178.4	33588	419.8	257.5	75.2	3157	61020	22331	0
KOS-A_153	239.7	375.1	15.1	142.6	24.6	44.7	87.4	30	173.8	32855	385.5	245.1	95.2	3393	67663	26610	0
KOS-A_154	240.1	424.8	20	142.1	24.5	40.5	82.4	23.1	193.4	34514	326	221.9	90	2964	73304	23206	0
KOS-A_155	253.4	320.4	17.9	142.1	23.8	63.9	93.4	48.5	170.2	33243	326.5	255.7	119.6	3987	37035	26024	0
KOS-A_156	213.8	345.5	17.5	120	24.8	39.2	79.3	44.1	150.1	29708	266.8	165.1	74.7	2643	57934	19904	0
KOS-A_157	238	357.3	19.5	141.6	24.1	46.8	84.3	30.9	177.7	34030	398.2	193.7	66	2984	43626	21504	0
KOS-A_158	246.5	387.7	23.7	128.6	23.5	35.2	82.3	23	211.6	35314	446.8	228.4	80.5	3075	86671	21434	0
KOS-A_159	227	377.3	9.9	93.8	21.1	38.4	68.2	19	234.9	32644	418.5	303.3	75.5	2924	68142	16326	0
KOS-A_16	249.3	373.4	25	135.2	25	43.3	75.9	26.6	190.6	35470	322.7	203.8	79.8	3068	49880	20557	0
KOS-A_160	183.4	322.7	10.4	109.7	22.9	31.3	66.2	39.5	235.6	31579	490.7	217.7	70.2	2292	75821	18237	0
KOS-A_161	242.8	315.6	14.9	133	23.8	47.8	83.9	26.3	187.6	34935	367.3	208	81.7	3129	36746	20589	0
KOS-A_162	215.1	333.4	16.1	125.8	27.7	39.2	83.3	34.6	142.5	30826	341.8	205	74.9	3020	61926	23072	0
KOS-A_163	223.9	332.9	14.1	120.6	26	34.3	79.7	24.4	185.1	30290	445.7	174.8	63.6	2555	65448	17996	0
KOS-A_164	221.4	374.5	14.4	110.6	21.8	33	71.7	25.8	204.6	31567	410	236.1	74.1	2248	89662	18784	0
KOS-A_165	204.6	343.2	14.1	110.8	23.6	42.3	78.4	32.3	206.4	30730	461.5	211.2	68.6	2830	70777	18654	0
KOS-A_166	226.2	350	19.4	154	25.7	50.8	77.2	33.5	167.1	33299	344.1	189.4	81.8	3365	63012	26866	0
KOS-A_167	223.8	359	17.3	141.9	24.4	44.9	81.4	36.2	187.1	34979	416.8	239.8	88.3	3361	49877	24182	0
KOS-A_168	220	339.7	14.8	121.2	24.3	38.2	75.1	30.2	205.2	32444	432.3	193.4	65.9	2649	35753	16267	0
KOS-A_169	239.2	361.7	10.6	129.8	23.5	45.9	79.8	30.4	218.8	33676	502.6	273.1	78.2	3048	83391	22285	0
KOS-A_17	241	404.3	17.4	123	24.7	38.5	77.8	15.9	198.8	33936	255.1	206.2	68.8	2765	69153	21079	0
KOS-A_170	231.6	394.8	14.5	113.7	23.6	31.8	84.2	24.7	230.7	34273	567.4	236.9	57.5	2492	73535	16543	0
KOS-A_171	233.3	352.7	17.4	115.9	24.1	45.2	88.6	33.9	189.5	34267	449	223.7	92.7	3279	72596	20617	0
KOS-A_172	242.5	385.8	16.5	124.3	23.6	43.2	79.3	32.3	223.6	35803	417.6	256.3	78	3274	62326	22023	0
KOS-A_173	244	408.9	18.2	131.3	24.3	56.9	76	27.9	143.6	33267	314.6	158	87.2	3112	85201	22786	0
KOS-A_174	248.7	434.2	15.3	119.2	24.9	50.2	85.7	23.5	205.2	34545	394.1	242.5	81	3180	61383	18529	0
KOS-A_175	250.7	385	17.6	134.7	28.2	49	97.2	29.3	182.8	34755	289.3	168.5	93.1	3195	70253	22864	0
KOS-A_176	261.8	372.7	23.7	151.9	28.2	48.3	89.3	41.7	173.7	36090	246.7	240	111.6	3652	69797	27157	0
KOS-A_177	256	363.6	16.2	113.1	23.1	43.5	70.7	32.5	170	30081	245.3	249.3	78.8	3095	75609	19980	0
KOS-A_178	237.9	381.5	17.6	153.5	25.3	51.5	84.8	23.2	198.1	36337	401.1	199.1	89.6	3176	65425	25751	0
KOS-A_179	228.6	398	18.2	133.5	26.1	33.4	85	31.2	198	32768	476.2	209.6	85.7	2865	78715	22672	0
KOS-A_18	217.2	339.1	13.1	123.7	25.6	41.5	90.3	31.5	193.4	31531	340	207.8	83.5	2935	65033	23237	0
KOS-A_180	212.8	338.5	17.8	142.9	23.9	36.8	79.5	36.2	175.8	32918	286.7	203	75.6	2636	51510	21472	0
KOS-A_181	223	348.1	15.2	151.9	26.1	37.2	87.4	47.5	210.9	35853	413.8	253.7	87.6	3318	46976	25142	0
KOS-A_182	241.4	394.9	16.5	114.2	26.2	39.1	72	28.3	210.3	32100	401.9	225.9	58.1	2502	54454	14269	0
KOS-A_183	251.7	312.3	17	161	27.4	65.6	95.3	47.6	178.2	35663	467.9	297.8	109.1	3884	64195	27929	0
KOS-A_184	222.5	371.6	14.6	127.7	27.5	52.4	87.7	26.4	182.8	32548	330.4	123.2	66.6	2689	62614	20472	0
KOS-A_185	247.6	395.1	20.5	167	26.1	54.7	92.1	39.6	195.8	38541	544	275.1	94.2	4153	38259	27787	0
KOS-A_186	212.5	379.5	16.7	131.6	24.5	29.1	74.9	25.6	168.5	30720	425.3	193.3	62.8	2512	65303	18944	0
KOS-A_187	232	350.7	12.3	122.5	24.8	48.4	71.2	31	177.8	29252	336.5	149.1	59.2	2481	41867	17477	0
KOS-A_188	201.5	365.3	9.2	128.9	22.7	42.6	82.9	38	212.9	34837	462.7	238	87.2	2975	64576	21819	0
KOS-A_189	241.1	378.2	17.5	149	28	43.6	90.3	26.7	208	37752	364.2	240.6	88.7	3261	63796	25727	0
KOS-A_19	230	366.3	13.3	113	24.4	40.3	79.2	29.2	241.2	35108	452.9	215.8	67.3	2693	56341	15877	0
KOS-A_190	229.5	391.8	17.9	100.9	23.2	19.7	77.1	33.2	195	31556	360.8	294.8	92.9	3192	77698	19634	0
KOS-A_191	232.2	397.2	17.6	115.8	20.5	41	81.8	27.3	163.8	32304	447.2	197.3	78	3052	72417	19742	0
KOS-A_192	237	370.7	13.9	118.5	25.8	38.4	81.7	33.5	206.3	31655	400.4	237.3	66.4	2814	79427	19925	0
KOS-A_193	245.4	368.2	21.6	157.6	25.9	48.5	82	38.2	167.6	35934	337.7	201	99.2	3386	44826	25434	0
KOS-A_194	231	340.1	15.5	133.3	27.8	48.6	87.6	36.4	203.6	34271	401.4	192.1	77.8	2902	58032	21094	0
KOS-A_195	227.3	390.4	6.3	95.7	21.7	45	70.6	16.2	211.8	28562	385.4	207.5	64.2	2433	75846	15220	0
KOS-A_196	220.1	400.9	19.1	148.1	26.7	27.9	80.3	32.1	217.4	36034	440.8	223.3	81	3162	80607	27303	0
KOS-A_197	264.3	395.6	17.4	157.1	27	51	76.1	25.7	176.3	35361	440.9	228.6	74	3162	57828	21951	0
KOS-A_198	220.8	434.9	16.5	111.7	21	28.6	67.6	37.4	218.2	34093	298.2	239.8	74.5	2772	91966	23146	0
KOS-A_199	244.5	377.8	16.4	127.1	22.2	42.2	83.9	32.1	209	33380	491.6	269.5	67.6	3258	79208	22214	0
KOS-A_2	216.9	325	14.6	114.5	23.6	30.8	75.2	39.4	169.4	29741	268.5	201.6	81.4	2800	57261	19369	0
KOS-A_20	231.2	389.3	19.9	133.9	25	30.4	81.4	20.3	197.9	34666	298.2	202.5	65.9	2524	64913	20426	0
KOS-A_200	236	344.8	21.7	165.4	28.8	48.4	91.3	23.2	183.1	36194	402.8	160.9	87.8	3065	60535	26279	0
KOS-A_201	259.7	386.2	21.5	163	28.2	44.5	101.2	36.5	242.3	40267	420.9	229.3	89.7	3265	63601	25378	0
KOS-A_202	212.8	316.4	19.6	142.3	26.5	43.6	85.2	31.3	165	34330	337.2	143	104.4	3335	55720	24334	0
KOS-A_203	242.1	395.5	23.2	124.2	25	53.4	88.1	19.4	185.5	38402	360.3	203.3	102.7	3455	85624	24501	0
KOS-A_204	227.8	394.9	12.5	108.1	23.2	29.8	80.2	28.4	216.2	33871	431.1	214.9	70.9	2719	73188	16024	0
KOS-A_205	244.4	408	17.9	128.8	26.4	43.8	86.2	43.5	173	32834	293.5	240.2	97	3550	79217	26349	0
KOS-A_206	255.8	406.3	19.1	157.1	25.6	41.1	83.9	35.3	210	36347	430.3	283.5	82.2	3337	59066	22941	0
KOS-A_207	245.6	396.1	18.5	133.5	25	43.3	76.8	16.3	169.8	33870	315.7	197.4	75.1	3239	40609	19535	0
KOS-A_208	238.7	467.3	24.8	137.3	23.6	42.7	75.1	29.2	185.2	35543	324	200.6	79.7	3036	71000	21455	0
KOS-A_209	241.7	314.8	18.6	157.8	25.9	42.8	84.2	21.7	211.2	33738	568.7	206.8	68.3	2933	43973	21391	0
KOS-A_21	267.6	392.5	25.7	166.7	26.3	50.1	92.2	37.2	183.8	39930	387.8	246.3	97.9	3895	58337	28815	0
KOS-A_210	222.4	363.6	11	137.5	26.4	54.6	87.6	41.2	219.9	36335	454.4	259.2	104.8	3698	68130	26617	0
KOS-A_211	228.1	356.4	18.9	142.9	26.4	30.8	91.1	47.8	212.8	35683	469.9	257.9	91.6	3437	80248	26045	0
KOS-A_212	245.2	395.7	15.1	110.3	24.4	47.1	80.1	35.3	163.4	31370	328.2	222.2	72.5	3039	92195	19916	0
KOS-A_213	252.3	414.7	12.5	145	25.8	47.5	83.1	24.2	166.5	34235	377	220.1	84.1	3136	70796	21026	0
KOS-A_214	242.6	447.3	21.1	110	24.3	33.6	81.8	31.8	182	33143	183.8	212.8	90.9	3333	87098	23174	0
KOS-A_215	238.3	420.6	20.1	120.9	20.2	39.4	79.7	30.7	208.2	32418	390.4	251.8	64.1	2650	87369	20228	0
KOS-A_216	264.8	404.9	18.8	138.3	25.8	38.2	78.6	30.4	207.8	34507	323.4	262.4	81.5	3268	54305	21598	0
KOS-A_217	212.9	409.7	13.8	110.1	22.9	31	57	27.3	179.3	29043	296.3	211	69.1	2293	85019	17836	0
KOS-A_218	234.5	394	22.5	142.6	25	38.8	93.6	33.9	202.1	41370	413.7	275.9	86.4	3866	51979	25159	0
KOS-A_219	228.6	350.7	16.1	128.3	23.5	53	77.8	34.8	162.1	28639	275.4	158.7	92.2	2893	67820	21389	0
KOS-A_22	224.1	373.8	13.2	121	23.8	45	76.5	24.6	208.5	35464	428.2	238.6	94.4	3046	48417	19299	0
KOS-A_220	249.6	365	21.5	145.8	23	39.3	84.9	32.5	189	34373	461.3	251.9	92.8	3557	78979	26551	0
KOS-A_221	227.1	380.9	19.7	133.3	26.8	33.9	76.1	38.2	183.1	36157	225.7	212.3	94.7	3052	54862	22525	0
KOS-A_222	249.6	413	20.6	149	24.2	32.3	66.8	13.5	162.4	32314	281	130.8	61	2256	59203	19937	0
KOS-A_223	231.1	341.2	16.4	143.7	24.5	37.8	79.3	32.5	213.6	33589	480.1	265	91.4	3036	69795	23771	0
KOS-A_224	225.3	318.7	15.8	156.7	27	44	83	34.4	171.7	34390	400.5	178.3	70.6	2840	25706	21465	0
KOS-A_225	245.1	438.4	14.5	114.2	25.6	29.9	86.5	34.7	209	34445	298.4	303.4	84.4	3029	79210	19964	0
KOS-A_226	219.4	327.7	16.9	130.5	27.2	41.3	82.4	31.7	164.8	33151	331.3	230.5	94.1	3459	67310	24778	0
KOS-A_227	218.7	357	15	101.7	20.9	28.2	76.8	30.8	202.4	29469	341.3	232.9	69.9	2528	79648	18624	0
KOS-A_228	232.5	338.4	15.1	131.4	23.7	47.2	82.2	34.3	201.6	34952	366.3	252.9	80.7	3344	53510	23312	0
KOS-A_229	229.9	398.9	13.4	123.9	24.6	37.4	80.9	30.9	223.9	33265	375.6	213.5	82.9	2807	71599	20067	0
KOS-A_23	223.9	343.8	20.7	146	25.8	41.1	87.7	35.2	196.9	35622	430.9	229.6	81.9	3261	49005	23440	0
KOS-A_230	231.9	415.8	15.2	109.3	25.1	37.1	76.5	32.3	200.5	32920	314.3	221.1	91.3	3188	93171	23550	0
KOS-A_231	221.9	384.5	19.3	133.4	25.3	29.1	71.7	34.8	201.1	33858	486.7	201.7	79.1	2686	77302	20479	0
KOS-A_232	242.5	386.1	21.5	146.6	27.4	48.9	90	33	193.9	34581	425.8	204.6	84.5	3295	60268	22973	0
KOS-A_233	229.4	362.3	17.9	149.1	26.8	36.6	82.1	34.4	205.9	35579	459.6	204.3	80.8	2971	62461	23678	0
KOS-A_234	243.3	399.6	13.9	111.2	23.5	36.1	71.3	23.3	190.1	31398	241.5	215.4	77.8	2869	70090	19024	0
KOS-A_235	248.1	389.3	18.2	136.5	24	53.6	82.3	16.9	173.2	35384	278.9	221.3	87.2	3062	50758	20814	0
KOS-A_236	246	372.6	14.2	133.7	27.5	48.7	77.4	36.5	204.7	31704	463.6	198.6	60.7	2612	88300	21980	0
KOS-A_237	238.2	379.6	17.2	131.7	25.3	50.5	83.9	24.7	167.2	33077	311.3	224.8	81.9	3547	62435	25220	0
KOS-A_238	240.5	406.6	20.5	126.9	24.5	39.7	81.3	34.8	171.6	31760	246.6	229.3	82.1	3025	75922	23494	0
KOS-A_239	236.3	356.9	13.5	117	22.1	41	80.6	38.1	224.1	32160	451.2	312.8	100.1	3534	73173	21662	0
KOS-A_24	250.1	384.2	18.1	144.2	24.2	39.3	79.6	23.7	170.7	32836	396.1	189.1	85.4	2875	81902	21947	0
KOS-A_240	245.1	378.3	22.7	163.1	28.1	56	90.7	18.6	198.9	38559	375.2	148.2	68.6	3364	51681	25604	0
KOS-A_241	226.6	363.1	17.9	131.3	24.1	27.7	70	14.2	190.6	30396	451	180.9	58.6	2397	70875	18495	0
KOS-A_242	232.3	332.8	16.7	131.9	26.1	52.9	95.1	23.7	180.5	34928	252.2	247.1	95.4	3372	38782	23027	0
KOS-A_243	230.7	382.2	14.9	111.7	25.5	29.8	73.9	30	198.1	30543	367.5	217.4	87.7	2659	81997	19072	0
KOS-A_244	269.7	366.1	24.3	155.7	26.5	61.2	92.4	31.2	127.7	36210	256.2	201	88.8	3783	49193	26905	0
KOS-A_245	228.1	323.4	14.8	129.8	26.9	32.8	87.1	42.2	192.3	33179	387.6	227.3	91.8	3074	59423	21662	0
KOS-A_246	230.3	352.6	16.8	130.8	25.3	46	77.3	37.9	203.6	34089	434.3	197.3	79.4	2937	72470	23428	0
KOS-A_247	239.9	381.3	18.2	151.4	24.6	41.8	90.7	39.9	221.3	35049	459.9	248.3	111.9	3393	69391	26578	0
KOS-A_248	208.5	380.9	13	105.3	24.5	23.7	74	39.7	245	34942	407.4	262	74.9	2462	62696	17942	0
KOS-A_249	235.6	321.6	14.6	135.5	29	58.4	92.9	34.1	201.7	35144	537.9	211.8	83.1	3326	54306	22096	0
KOS-A_25	261.8	413.1	15.7	140.5	23.1	49.2	82.8	27.1	187.5	35848	290.9	301.7	94.1	3642	53205	22834	0
KOS-A_250	229.2	381.3	17	142	23.2	41.8	79.3	25	202.3	35618	383.5	231.7	87.3	3214	63295	24074	0
KOS-A_251	206.6	394	13.7	107.8	22.7	33.5	77	40.5	196.7	29516	414.6	237.8	66.1	2417	81774	18357	0
KOS-A_252	257	365.9	15.3	128.3	24.5	53	81.7	38.2	169	33251	344.2	229.3	80.2	3301	41211	18126	0
KOS-A_253	259.3	409.8	19.6	141.8	24.3	49	84.6	21.2	202.5	35804	442.2	191.5	66.1	2701	53230	17706	0
KOS-A_254	239.9	433.7	19.1	105.3	22.3	35.7	80.3	6.9	170.6	33648	159.6	252.9	85.6	3130	79263	20966	0
KOS-A_255	210.8	401.3	11.1	119.2	26.6	38.6	78.7	28.7	172.3	32600	406.3	169.3	69.9	2512	79484	19581	0
KOS-A_256	222.3	317.3	8.4	122.4	26.2	43.2	85.7	49	190.8	31695	375.4	271.7	104	3515	54287	22302	0
KOS-A_257	223.1	354.2	17.8	134.9	25.9	45.1	88.3	38.9	213.8	34709	382.6	226.4	79.6	2912	65916	23279	0
KOS-A_258	214	336.9	14.3	128.3	23.1	42.6	73.5	24	168.5	28500	429.8	172.1	79.3	2595	78735	21802	0
KOS-A_259	252.9	401	14.3	132.2	24.6	56.2	86.9	36	199.1	33313	421.8	218.4	94.8	3371	56718	23298	0
KOS-A_26	254.3	434.6	16.5	120.3	20.9	49.6	78.4	32.2	204.4	34854	360.5	289.3	81.6	3427	70412	22761	0
KOS-A_260	230	399	16.4	115.1	24.6	29.9	76.1	26.6	210.6	31044	442.3	224.6	69.9	2383	78921	18433	0
KOS-A_261	275.2	435.8	26.7	176.8	24.9	59.3	89.3	21.6	194.2	40095	300.1	231.8	104.6	3860	50032	27983	0
KOS-A_262	258	440.3	18	141.8	24.4	42.8	74.8	25.9	176.7	30963	456.9	197.1	59.7	2567	85199	21682	0
KOS-A_263	237.2	361.3	12.8	120.1	24.6	42.3	75.2	27.2	216.6	29690	452.7	220.7	63.5	2575	67849	16676	0
KOS-A_264	254.3	385.7	18.7	152.1	24.7	35.2	88.7	26	185.8	36419	374	240.4	78.8	2958	62608	22805	0
KOS-A_265	235.2	417.5	15.6	136.5	26.5	34.4	74.8	31.9	186.9	34784	261.3	245.2	73.7	2975	55222	22583	0
KOS-A_266	233.5	375.9	17.1	107.1	22.8	32.6	74.3	30.7	187.6	33874	350	242.6	82.8	3033	73211	20137	0
KOS-A_267	215.9	334	11.4	91.8	23	31.2	69.3	35.7	241.8	30357	409.4	232.3	68.5	2662	70905	17478	0
KOS-A_268	211.6	329.5	16.6	112.2	23.6	32.7	79.3	39.6	190.8	29403	375.7	206.6	73.6	2439	61410	16369	0
KOS-A_269	213.9	380.4	14.3	135.4	22.4	57.9	71.6	26	167.3	32094	351.8	218.9	94.7	3402	73569	27071	0
KOS-A_27	244.9	386.8	15.1	141.6	22.5	44	80.5	27.7	201.1	36429	447.6	270.9	78.6	3080	65757	21622	0
KOS-A_270	246.4	367.6	23	156.5	23.9	47.5	81.6	27.5	215.8	35494	340	258.8	97.1	3455	60228	27694	0
KOS-A_271	241.4	398.9	19.6	145.5	24.6	40.3	90	34.4	214.1	37933	385.7	302.5	102.4	3867	73521	27842	0
KOS-A_272	247	348.5	20.7	140.7	27.8	48.9	91.9	39.1	181	36495	386.4	290.5	92.7	3670	53053	24584	0
KOS-A_273	225.7	367.1	16.5	140.2	27.4	42.2	82.4	32.4	191.7	34529	363.8	172.5	85	3115	56516	23767	0
KOS-A_274	224.3	408.9	18	110.7	21.2	36	77.6	38.6	201.7	34193	328	229.5	64.6	2289	87230	17818	0
KOS-A_275	248	459.6	19.1	125	25.7	40.2	75.7	29.3	192	34952	242.7	233.2	74.5	3018	90892	23624	0
KOS-A_276	222	356.3	16.8	130.6	24.7	45	75	20.6	195.4	32357	326.8	160.9	65.1	2755	73515	23136	0
KOS-A_277	214	349.1	18.5	131.9	25.5	41.4	82.2	23.1	179.7	32162	348.7	175.5	80.3	2952	60454	21495	0
KOS-A_278	224.5	326	22.1	143.1	25.6	52.3	71.4	43.6	159	28913	441.7	153.8	66.4	2688	61030	22119	0
KOS-A_279	228.3	412.1	15.4	122	22.7	39.2	72.8	33.1	179	30718	319.8	256.8	79.9	3152	80109	23191	0
KOS-A_28	251.2	392.4	16.3	110.6	25.8	38.3	73.6	29	196.8	32903	417.2	204.1	67.7	2435	72919	15614	0
KOS-A_280	246	377.3	20.7	118.4	26.8	38.5	85.2	9	189.1	33265	457.3	97	69.9	2526	65539	15333	0
KOS-A_281	243.9	363.6	16.2	139.8	25.6	53.1	74.1	24.2	190.5	33133	344.3	239.8	91.7	3693	63581	28597	0
KOS-A_282	234.5	395.9	18.6	116.5	22.7	30	68.6	28.3	239.5	34954	429.3	301.7	101.7	3178	87246	21220	0
KOS-A_283	241.1	373.2	15.7	127	22.2	35.4	74.6	23.2	175.8	32651	396.2	237.3	79	2957	68927	21950	0
KOS-A_284	271.3	384	22.2	156.6	27.3	50	84.2	31.7	166.3	35940	433.2	195.2	84.9	3176	72505	23152	0
KOS-A_285	238.6	402	13.9	105.2	20.7	50.3	72.3	16.5	174	29251	435.4	271.4	80.3	3235	73569	19352	0
KOS-A_286	246.1	408.1	20.6	172.9	26	50.6	88	36.5	221.7	37807	392.2	250.6	101.5	3560	69645	29365	0
KOS-A_287	239.5	353.2	12.6	134.3	24.9	52.9	76.2	35.5	207.6	33380	433	213.2	78.7	3066	51501	19844	0
KOS-A_288	246.5	424.9	20.3	126.1	24.7	41	70.6	23.6	158.5	29725	398.4	186.9	59.9	2780	95854	22575	0
KOS-A_289	232.7	349.5	9.7	93.1	23.3	41	70.2	20.6	186.9	26777	381.4	226.2	73.3	2801	77607	15525	0
KOS-A_29	209.6	313.6	16.7	122.4	22.6	39.4	75.3	22.6	193.5	31661	384.5	187.2	70.2	2772	39738	17443	0
KOS-A_290	237.4	374.7	17.1	125	23.2	45.4	63.9	27.7	163.6	27931	381.1	207.3	74.9	2742	90860	21566	0
KOS-A_291	234.3	376.4	15.8	129.3	22.8	42.1	75.6	29.7	200.7	29578	289.6	249.5	91.2	2979	67468	22973	0
KOS-A_292	234.5	370.9	17.9	149.3	27.9	37.4	90.3	42.7	216.5	38885	393	279.4	89.8	3375	63560	24369	0
KOS-A_293	225.2	378.8	15.6	101.1	23	32.7	60.4	18.3	178	29235	172.1	214.9	55.3	2470	51712	16356	0
KOS-A_294	230.4	421.3	16.8	121.6	21.9	37.1	63.7	20.8	157	29582	227.7	149	55.5	2144	60866	15480	0
KOS-A_295	255.2	333.7	12	150.2	26.6	50.9	90.9	26.2	201.6	35950	467.2	232.6	104.8	3545	33995	23024	0
KOS-A_296	234.6	409.8	20	122	23.1	44.2	75.4	32	210.2	34614	455.6	237.8	85	3332	91796	24085	0
KOS-A_297	251.2	404.3	22	156.2	25.9	38.9	79.4	23	185	34381	471.9	240.6	74	3085	77533	25951	0
KOS-A_298	234.3	365.1	17.3	135.6	28.9	43.4	82.4	32	158.9	34471	360.2	184.7	82.1	2980	65092	22162	0
KOS-A_299	222.5	356.6	8.1	102.3	24.1	47.3	81.4	31.8	177.7	28618	277.3	209.5	74	2653	74781	17895	0
KOS-A_3	227.8	323.5	21.4	125.8	24.8	49.1	74.8	22.2	184.6	35839	400.9	219	82.9	3423	63347	23602	0
KOS-A_30	247.9	346.4	13.7	142.5	28.6	37.5	83.3	34.8	198.1	34555	405.8	200.5	97.1	2962	62676	21538	0
KOS-A_300	228.1	329	15.8	130.9	26.2	42.3	87.3	33.9	195.1	33674	351.6	212.3	103	3425	59820	23562	0
KOS-A_301	241.5	447.4	18.7	121.2	26	42	87.2	25.4	225.9	37229	375	197.5	68	2889	81277	19774	0
KOS-A_302	235.7	330.9	8.6	137.8	26.8	49.6	83.2	31.6	186.3	31726	403.3	193.4	83	3135	36665	20491	0
KOS-A_303	256.9	402.8	20.4	125.8	22.8	54.1	81.1	24	154.9	31331	306.6	196.5	89	3157	76287	21532	0
KOS-A_304	234	388.4	19.7	153.6	23.9	40.2	90.1	33.8	182.7	33932	283.4	273.7	101.8	3548	56038	26145	0
KOS-A_305	228.3	370	13	125.8	22	46.3	73	32.8	156.9	31938	315.6	302.3	100	3904	82492	26729	0
KOS-A_306	251	382.3	20.8	159.7	24.6	48.8	81.9	32.2	165.3	34255	390.7	196.7	87.2	3455	56872	25607	0
KOS-A_307	221.9	388.8	10.1	124.5	22.5	37.6	68.4	33	233.5	35206	439.3	297.3	80	3098	76002	22741	0
KOS-A_308	273.9	435.1	17.2	115.7	26.1	37.9	87.3	41	197.1	36112	230.8	297.8	93	3445	42220	18344	0
KOS-A_309	263.8	382.5	20.4	128.6	26.8	41.2	87.5	26.6	172.8	36532	351.4	211.1	82.9	3226	52762	19641	0
KOS-A_31	244	354.5	14.2	129.8	22.3	38.8	82.6	36.7	210	32165	422	272.3	92.5	3414	64540	23225	0
KOS-A_310	235.7	368.9	21.3	146.3	26.1	47.4	85.6	32.5	192.5	38071	411.6	187.6	86.1	3362	40087	21992	0
KOS-A_311	233.1	317.3	16.2	160.6	26.7	43	89.4	24.2	223.5	33552	519.7	202.2	95	3169	74225	25108	0
KOS-A_312	246.4	409.9	19.5	140.7	24	44.7	81	25.8	199.4	33141	376.7	198.7	87.3	2841	64466	22276	0
KOS-A_313	231.1	367.9	15.7	101.7	23.6	40	82.9	32.2	206.4	32061	285.8	217.1	97.7	3113	65156	18565	0
KOS-A_314	256.8	378.1	19.1	137.4	26.2	48	90	30.8	208.5	36416	356.7	273.9	91.2	3436	64950	22867	0
KOS-A_315	213.1	366.7	9.1	95.9	24.4	30.4	77	32.5	233.9	31961	484.4	202.8	67.4	2301	70112	14277	0
KOS-A_316	248.8	374.4	17.2	138.4	27.8	61.1	95.6	35.7	202	36112	370.3	208.4	95.1	3508	38828	23848	0
KOS-A_317	250	430.7	18.3	146.1	26.6	40.8	87.6	32.9	196.2	37543	264.8	229.5	81.2	2778	69866	23210	0
KOS-A_318	238.8	373.9	18.4	125.3	24.1	38.9	85.5	30.7	197.8	34340	422.1	289.9	81.5	3476	76005	24290	0
KOS-A_319	229.2	368.1	14.4	121.2	20.4	31.9	71	21.4	174.8	32856	237.6	305.4	87.2	3214	69138	22951	0
KOS-A_32	229.8	331	12.7	134	23.1	46.6	78	34	168.9	29994	345.9	212.8	88.9	3124	41461	21552	0
KOS-A_320	254.3	437.1	15.7	126.7	21.5	40	79.6	27.2	195.4	36443	416.2	308.1	85.9	3509	78669	23019	0
KOS-A_321	205	326.7	11.3	110	22.3	45.5	76.7	30.1	194.7	32675	392	247.8	87.4	3368	58881	21595	0
KOS-A_322	204.2	315.6	16.5	129.7	25.5	33.1	89.5	24.9	228.3	34808	381.8	261.8	89.7	3241	67397	23778	0
KOS-A_323	236.4	385.9	16.2	121.1	24.5	53.2	82.6	24	169.1	32478	451.5	171.3	72.6	2741	86437	19456	0
KOS-A_324	232.6	395.6	16.1	120.4	24.7	38.4	75.4	34.5	171.5	32718	315.4	221.2	79.9	2971	61533	21410	0
KOS-A_325	239.3	394.4	14.6	133.5	23.8	46.4	75	14.1	169.2	31689	537.5	184.8	65.9	2795	84354	20051	0
KOS-A_326	216.1	379.9	15.3	115.1	24.6	45.9	71.4	25.7	184.2	33211	321.8	161	74.4	2856	53247	19289	0
KOS-A_327	235.2	367.7	6.1	105	24.7	48	69	25.8	199.7	28449	303.2	240.1	57.8	2507	95056	18270	0
KOS-A_328	208.7	330.8	10.9	132.8	25.7	39.2	86.5	34	190	33815	355.6	262.4	118.3	3734	54357	25154	0
KOS-A_329	231.8	368.5	21.7	124.1	29.5	42.3	86.6	26.7	222.4	35259	458.3	187	77.7	2878	71391	19744	0
KOS-A_33	221.6	358.1	15.5	130.7	23.9	43.2	81.1	32.4	194.7	33692	364.1	221.6	98.8	3292	65075	23971	0
KOS-A_330	211.6	384.7	10.3	104.6	19.9	34.9	63.6	30.9	209	28937	304	297.3	88.1	2871	90818	19775	0
KOS-A_331	266.5	388.1	29	170.8	26	55.1	88.4	15.6	171.1	35696	445.8	191.6	84.7	3430	67989	25926	0
KOS-A_332	209	326.4	20.3	141	25.3	40.8	81.4	22.7	213.9	36397	430.1	206.1	86.3	2822	58969	19825	0
KOS-A_333	225.4	290.8	18.8	125.5	26.2	39.5	95.3	38.1	156.7	31599	197.3	189.8	110.5	3605	41928	22758	0
KOS-A_334	216.1	384.8	14.5	133.9	22.4	34.7	73.9	50.6	217.1	35197	405.9	304.8	89.7	3283	79329	25783	0
KOS-A_335	214.4	350.5	16	126	23.3	43.4	73.3	45.6	189.6	33287	396.4	266.2	83.7	3355	56537	22894	0
KOS-A_336	235.6	340.1	16.8	120.7	26.1	53.4	84	37.8	192.4	29410	342.2	203.5	79.1	2713	66691	20114	0
KOS-A_337	215.2	335.1	11.4	114.7	23.2	43.7	67.9	33.2	186.8	28080	411.9	193.7	59.9	2806	46950	16787	0
KOS-A_338	240.2	372.5	20.7	143.6	24.6	33	94.2	33.7	205.2	39084	271.3	298.6	121.9	4016	46157	25970	0
KOS-A_339	218.5	435.8	11.7	102	20.7	43	63.4	18.4	165.8	26809	290.4	179.9	57.7	2472	84469	17878	0
KOS-A_34	254.1	393	18.5	113.8	22.3	27.4	77.7	20.8	188.6	32626	291.2	288.4	82.1	3068	62621	17085	0
KOS-A_340	252.1	385.3	23.4	136.4	26.3	53.2	89.3	36	194.6	38444	293.2	240.5	100.1	3752	58463	26075	0
KOS-A_341	204	395.7	14.8	115	22.3	36.7	84.1	33.5	192.3	31314	369.8	237.8	65.2	2728	85871	20852	0
KOS-A_342	247.4	360.1	19	136.2	27.7	43.4	80.8	25.2	191.9	33294	385.9	215.9	59.2	2677	54411	19832	0
KOS-A_343	238.3	350.5	20.2	167.5	30	45	91.3	31.2	202.7	36745	474.3	177	72.2	2957	61232	25730	0
KOS-A_344	226.3	359.5	11.7	114.6	19.9	44.9	76.8	30	191.9	30323	355.2	244.1	73.4	2999	77173	21599	0
KOS-A_345	236.3	382.3	17.4	124.6	26.2	53.3	80.2	41.3	173.9	33573	282.7	199.3	93.6	3391	62154	25311	0
KOS-A_346	273.7	352.3	16.3	157.1	27.3	58.1	92.5	27.1	211.9	39793	359.6	251.1	112.6	3904	45492	24728	0
KOS-A_347	207.4	362.3	18.3	132.2	23.1	42.8	75.3	25.9	151.4	31079	253.3	172.9	82.1	2941	52368	24045	0
KOS-A_348	236.6	393.5	14.2	140.4	24.9	50.1	74.5	29.1	164.9	31656	292.4	185.3	75.3	2908	49282	20785	0
KOS-A_349	233.9	363.7	15.2	132.9	26.6	43.2	71.2	12.6	155.6	28645	358.7	113.4	56.9	2126	68252	17884	0
KOS-A_35	237.5	418.9	15.7	142.8	26.9	41.9	86	28.3	192.1	35774	407.8	208.9	70.7	2724	64190	21528	0
KOS-A_350	226.1	344	15.5	134.7	24.1	47.9	81.3	28.1	183.7	34618	362.7	215.6	96.5	3477	61420	24950	0
KOS-A_351	277.4	361.6	20.2	137.6	27.4	54.3	100.3	33.3	217	36397	398.5	250.4	100.9	4019	51477	23502	0
KOS-A_352	236.2	387.8	16.6	123.9	24.9	40.9	81.7	29.8	207.6	35027	352.2	269.7	95.7	3171	93208	23573	0
KOS-A_353	257.8	391.1	20.3	147.2	22.3	49.7	75.3	18.7	179.2	31825	393.3	232.7	64.1	3202	75060	22692	0
KOS-A_354	206.9	369.1	15.3	114	25.9	31.5	77.2	39.1	181.4	32167	413.7	158.8	75.3	2761	80327	20685	0
KOS-A_355	221.6	351.5	18.3	128.8	25.8	29.8	80.1	29.7	161.7	34533	276.6	231.4	99.9	3442	66870	22680	0
KOS-A_356	216.2	374.9	16.3	124.9	24.1	37.4	85.8	41	182.2	33253	261.3	264.8	95.3	3259	69957	24755	0
KOS-A_357	235.7	379.9	18.4	146.7	27.9	49.2	88.2	32.5	178.3	34548	344.5	200.5	78.2	3238	63650	24001	0
KOS-A_358	220.6	355	20.1	118.8	26.5	34.3	85.1	29.7	193.2	33468	394.4	255.6	94	3057	86239	21602	0
KOS-A_359	247.4	406.6	15.2	120.4	21.1	43.6	74.8	29.7	200.6	32666	340.8	246	77.7	3208	69679	20605	0
KOS-A_36	203	323.6	12.2	108.5	23.1	27.7	77.2	33.3	198	27669	401.1	173	67.3	2167	76806	17263	0
KOS-A_360	234.2	427.7	15.6	125.7	24.7	31.5	65.2	26.6	197.4	32794	363.1	226.4	69.5	2502	95525	20953	0
KOS-A_361	271.7	408.9	19.3	133.6	21.7	46.4	80.1	19.6	176.9	33722	432.3	211.6	85.4	3281	77948	21158	0
KOS-A_362	221.1	350.7	12.7	112.3	21.6	29.1	79.9	30.8	213.1	32425	481.3	278.7	82.5	3137	73425	20500	0
KOS-A_363	254.8	380.5	19.6	139.3	25.5	46.6	89.9	35.4	234.9	37359	352.7	320.4	104.7	3923	59973	25668	0
KOS-A_364	246.4	360.6	19	164.2	30.3	46.5	96.4	26.3	175.9	35351	470.5	142.6	91.6	3398	40758	24254	0
KOS-A_365	236.5	368.4	19.6	153.3	24.7	43.2	85.3	29.6	177.1	35934	420.2	216.7	86.4	3144	48678	23980	0
KOS-A_366	231.2	380.3	13.7	125.9	24.8	41.6	85.4	33.1	193.2	33505	384.6	225.8	85.5	3232	78605	20564	0
KOS-A_367	242.1	353.3	21.7	124.3	24.5	39.8	85.3	14.8	188.1	35475	246	200	73	3011	68021	22120	0
KOS-A_368	232.8	312.4	17.5	141.8	25.5	54.4	85.4	35.1	175.9	31563	362.6	217.2	103.2	3277	56805	24470	0
KOS-A_369	211.4	405	11	88.3	22	39.3	68.1	25.8	188.7	31153	280.6	201.6	73	2560	82598	17877	0
KOS-A_37	224.5	355	17.1	125.1	22.7	36.2	78.9	22.6	188.9	30098	251.4	183.4	85.6	2989	43396	19015	0
KOS-A_370	256.4	392.6	16.6	148.3	24.7	50.5	82.8	32.3	198.7	36246	418.5	256.3	100.4	3888	61818	26272	0
KOS-A_371	261.5	385.6	25.1	143.9	26.7	46.3	84.2	32.9	184.7	36073	416.8	227.3	86	3669	53171	23141	0
KOS-A_372	233.5	379.9	12.5	96.4	22.1	58.9	69.4	9.7	157.3	28472	325	168.6	66.6	2831	57664	16389	0
KOS-A_373	208.3	373.5	13.6	121.9	20.7	41.5	66.8	22.1	187	31046	272.1	215.8	101	3509	74231	24785	0
KOS-A_374	245.5	430.2	15.1	123.8	25.6	47.6	73.6	31.9	184.7	33285	319.8	259.8	92.5	3559	59446	23859	0
KOS-A_375	234.4	393.7	17.1	132.1	24.6	40.5	82.2	31.9	196.2	34540	409.8	215.4	91.5	2966	95717	24096	0
KOS-A_376	244.6	364.8	15	129.9	23.1	51.1	88.4	29.3	193.6	31931	355.5	194.4	83	3101	53701	21416	0
KOS-A_377	243.7	420.6	20.1	121.2	23.1	37.1	85.6	32.9	168.8	32286	286.3	212.2	70.4	2990	81112	22786	0
KOS-A_378	265.3	359.8	20.7	127.9	27.8	40.2	82.3	15.4	179.1	34556	363.1	176.3	58.2	2835	71426	19246	0
KOS-A_379	232.4	348.9	11.5	124.2	25.2	51.5	77.4	31.5	212.7	32940	482.1	217.6	80.2	3048	62898	20772	0
KOS-A_38	246.1	363.8	17.3	145.8	25.4	42.3	84.7	44	185.1	36475	355.9	267.7	107.7	3873	58030	25972	0
KOS-A_380	217	354.6	17.8	121.3	25.1	32.9	78	22.8	190.2	31330	404.5	158.7	64.3	2513	72338	18253	0
KOS-A_381	239.5	323.5	14.4	118.7	24.3	54.3	85.4	41	211.1	32383	468.7	240.3	92.3	3162	58931	19597	0
KOS-A_382	250.8	390.5	17.3	150.2	24.6	41.3	78	28	182.7	38008	345.7	290.4	81.7	3421	68642	26191	0
KOS-A_383	218.2	339.5	17.2	123.4	22.7	42.6	78.7	14.6	156.7	31516	399.2	216.1	81.2	2951	81457	19969	0
KOS-A_384	236.2	344.3	15.8	149.3	27.4	49.7	83.2	40.7	216.9	37950	517.1	279.5	75.5	3457	52828	25514	0
KOS-A_385	224.2	364.9	24.2	123.1	26.3	34.8	78	44.4	160.1	30757	287.1	206.4	79.7	2890	82600	21425	0
KOS-A_386	274.8	393.8	21.5	136.8	26.9	45.6	89.2	23.6	196.1	39804	255.3	296.1	105.7	4199	54985	26613	0
KOS-A_387	231.8	377.8	17.7	121.7	27.1	30	80.1	18.1	186.4	30416	218.1	135.5	69.2	2137	76491	18248	0
KOS-A_388	246.7	360.2	14	105.9	21.7	45.6	73.8	26.8	163.2	28324	351.8	265.4	68.6	3034	82426	17412	0
KOS-A_389	261.8	335.4	18.6	152	24.8	54.9	72.9	18	187.6	33097	452.6	177.9	82.1	3247	57003	23080	0
KOS-A_39	223.7	350.7	12.6	131.3	23.3	39.9	76.5	23.1	169.9	29113	353.9	160.8	58.3	2216	71562	18850	0
KOS-A_390	250.3	411.9	16.2	108.8	21.3	54.6	76.8	23.8	168.5	30974	177.3	238.2	92.7	3626	76628	22473	0
KOS-A_391	231.5	355.6	22.3	155.6	25.7	43.7	87.4	36.5	183.1	34609	514.6	199	75.7	3085	65589	25500	0
KOS-A_392	234.9	337.6	16.5	140.2	24.6	46.7	89.6	25.7	174.5	35416	370.3	236.3	89.4	3548	28641	21712	0
KOS-A_393	211.8	353.2	17.1	133.1	20.1	47.5	73.1	31.6	153.9	29743	392.5	189.3	71.2	2775	74747	21785	0
KOS-A_394	216.3	408.2	11.5	109.4	24.1	34.5	72	37.3	166.7	31691	280.2	229.2	86.4	3009	67902	20729	0
KOS-A_395	227.5	380.3	17.2	109.4	23.2	40.8	74	34.7	190.5	31935	475.6	214.6	68.8	2525	74814	15720	0
KOS-A_396	229.8	342.5	16.7	130.9	21.9	46.5	78.5	19	167	32773	390.6	163.4	86.8	3001	58283	20953	0
KOS-A_397	250.8	390.6	17.4	123.4	21.9	48	75.3	25.7	161.9	31490	324.7	244.3	85.9	3126	66327	21121	0
KOS-A_398	264.1	348.1	21.2	156.8	25.2	56.4	88.5	10.3	168.9	33911	483.4	150.9	78.2	3348	56549	23907	0
KOS-A_399	217.8	366.7	22.6	114.3	22.5	29.2	85.5	41.5	218.1	35687	306	313.1	101.4	3505	86152	24777	0
KOS-A_4	239.3	405.7	13	104.7	22.2	48.1	83.6	17.8	197	30663	411.8	227.5	63.8	2861	89044	18804	0
KOS-A_40	220.6	390.2	20.6	139.1	23.6	45.3	74.2	34.2	191.3	35050	307.7	231.7	94.9	3290	63373	25257	0
KOS-A_400	260	417.4	19.8	134.2	24.8	53.2	78.8	31.5	195.6	35835	303.6	222.1	85.6	3081	67717	23321	0
KOS-A_401	226.9	400.6	19.6	148.2	25.1	28.9	89.2	20.5	216.7	35999	415.2	202.7	75.4	2709	68397	21787	0
KOS-A_402	229.4	377.5	15.6	114.2	24.1	53.2	91.2	33.3	175.1	31466	283.6	224.2	89.8	3448	77567	23058	0
KOS-A_403	228.6	397.3	13.6	100	24.3	42.8	79.7	28	230.2	33223	369.7	214.9	73.5	2705	72501	16882	0
KOS-A_404	228.9	373.8	18.5	135.7	26.5	45.2	95.1	32.2	231.5	36746	461.5	249.7	91.3	3296	79826	26586	0
KOS-A_405	240.3	369.6	20.3	122	23.1	45.5	80.4	27.8	187.6	29241	375.3	195.3	66.1	2794	73277	20188	0
KOS-A_406	241.2	394.1	18.8	154.8	24.4	55.1	85.9	44.1	159.9	36067	346.4	227.8	94.3	3453	71463	28255	0
KOS-A_407	228.7	361.2	16.7	130.5	23.2	41.5	86.4	27.3	209.5	35617	417	223.2	75.3	3070	57388	20949	0
KOS-A_408	196.3	331.7	10	115.2	23.9	40.9	72.8	31.2	212.2	30872	456.3	177.7	70.8	2678	75671	20024	0
KOS-A_409	231.5	356.3	16.7	151.7	25.9	41.4	71.1	25.2	155.5	31293	468.1	187.1	74.6	2920	66453	22779	0
KOS-A_41	245.8	438.9	16.7	137.9	23.3	35.4	74.5	20.6	197.2	34929	363.3	227.1	64.9	2701	88175	22943	0
KOS-A_410	219	341.5	15.8	127.7	24.8	33.2	76.3	29.5	156.1	29841	243.5	240.4	71.1	2731	37842	18887	0
KOS-A_411	250.2	386.5	15.8	139.6	27	57.6	85.3	39.2	187.5	33520	446.6	229.8	83.9	3130	57758	21252	0
KOS-A_412	230.5	384.6	16.3	141.1	25.5	35.3	89	31.1	171.6	32586	304.2	212.8	89.1	3342	61271	26311	0
KOS-A_413	216.8	340.9	18	119	23.9	34.7	93.1	33.9	203.1	33668	376.8	272.1	91.8	3311	35806	20913	0
KOS-A_414	191.2	342.6	12.4	123.9	22.4	47.8	72.9	30.4	175.7	29857	387.3	202.4	73.3	2870	47161	22518	0
KOS-A_415	227.6	413.4	16.9	121.9	20.1	33.8	80	24.8	193.1	32600	361.3	275.9	72.1	2817	65053	18660	0
KOS-A_416	235.2	349.6	17.5	138.5	27.6	41	83.2	27.7	192.8	34355	414.2	243.4	70.8	3106	50498	22081	0
KOS-A_417	242.7	403.5	18	145	24.3	38.3	77.3	33.2	153.4	32015	297.4	230.4	90.1	3082	76307	25585	0
KOS-A_418	233.1	384	17.3	138.9	30	44.2	85.9	33.4	200.4	35300	498.7	190.8	86.5	3042	80618	23635	0
KOS-A_419	230.8	341.1	22.7	142.9	27.8	39	83.6	31.8	179.8	33800	250	176.3	103.2	3386	51194	25304	0
KOS-A_42	227.2	394.6	16.8	127.4	24.5	35.8	79.4	41.1	233.6	35899	571.8	270.1	93.6	3287	86980	22379	0
KOS-A_420	238.6	389.9	16.2	115.5	22.8	40.1	77.6	32.8	207.7	34343	464	211.5	62.7	2969	75820	19899	0
KOS-A_421	255.6	351.5	23.1	154.1	27.1	40.1	97.9	30.6	206.3	37052	429.6	236.9	93.7	3495	54400	24340	0
KOS-A_422	243.5	377.2	13.2	136.4	25.2	46.1	85.9	30.6	227.5	38965	461	297.1	90.1	3848	58402	23736	0
KOS-A_423	249.5	395.7	12.2	134.5	27.9	48.4	81.6	19.5	202.7	34332	386.2	220	76.8	2964	76757	21036	0
KOS-A_424	244.1	350.4	19.2	149.1	26.8	45.5	82.3	30	164.2	35551	324.2	185.6	73.7	3165	54795	22891	0
KOS-A_425	234.6	367.2	17.4	143.9	25.8	45.5	83.4	26.3	200.4	35894	354.5	273	102.8	3490	75293	24798	0
KOS-A_426	206.5	317.5	16.5	139.7	27.7	43.2	76.1	38	168.3	32476	359.2	156.2	85.3	3339	53741	23994	0
KOS-A_427	246.1	409.5	24.2	124.9	26.7	38.5	92.8	22.5	198.6	38598	337.6	201.7	97.5	3396	76677	21783	0
KOS-A_428	219.1	332.4	19.6	125.8	24.1	40.9	72.4	21	144.7	30727	290.3	139.9	83.1	2870	34856	20160	0
KOS-A_429	225.6	383.7	16.6	126.7	25	42.4	90.5	39.8	195.7	35242	416.7	246.4	80.7	3351	59481	22550	0
KOS-A_43	247.3	335.9	16.5	143.5	26.7	53.7	91.8	30.3	207.8	35702	383.6	240.3	100.9	3715	44980	24241	0
KOS-A_430	230.1	348.7	17.8	139	24.6	47.8	84.1	38.8	180.5	33504	269.4	270.4	100.6	3759	52763	28286	0
KOS-A_431	201.3	344.4	11.1	102.7	21.4	31.7	75	37.2	217.6	31869	326	278.8	83.3	2944	75521	21660	0
KOS-A_432	238.3	335.2	17.9	128.7	25.6	40.9	88.2	35.7	243.4	36290	493.1	257.6	99.9	3481	53177	22738	0
KOS-A_433	227.6	398.9	16.1	121.5	22.2	43.1	69.8	26.7	185.3	33167	360.9	250.1	88.5	3101	85506	22740	0
KOS-A_434	215	367.7	10	136.5	22.7	45.6	82.6	44.4	222.8	33256	392.3	270.8	87.4	3385	72974	27219	0
KOS-A_435	229	335.8	21.2	140.1	26.7	38.8	80.9	28.5	137.8	31905	330.9	225.7	79.2	3180	51321	22434	0
KOS-A_436	217.6	397.9	10.8	101.2	24.1	42.4	74.4	39.4	204.6	29751	349.3	217	58.4	2479	83367	17617	0
KOS-A_437	216.6	352.6	15.3	144.9	28.4	45.5	86.7	38.4	212.5	34295	423	208.6	90.2	3311	68405	26875	0
KOS-A_438	212.8	379.7	16.6	145.7	24.9	30.3	75.4	21.4	206.3	33066	359	164.5	66.9	2285	44314	19903	0
KOS-A_439	222.1	395.4	12.4	97.9	24	43.7	67.5	16.3	164.4	29624	285.5	184	55.8	2591	82310	18225	0
KOS-A_44	250.4	350.6	18.8	133.3	25.8	58.5	80.3	23.9	162.5	32204	405.8	200.3	78.2	3354	59355	20891	0
KOS-A_440	236.1	382.3	11.1	130.4	20.9	49.2	76.9	34.3	173.3	29886	337.1	240.5	98	3654	82088	26478	0
KOS-A_441	219.9	397	19.5	142.5	26.1	33.5	70.4	25.7	174.6	31686	360	137.7	50.7	2372	60215	22013	0
KOS-A_442	208.7	355.7	15.6	126.4	22.5	36	72.3	23	198.8	31672	401.5	226.6	76.8	2590	58185	20168	0
KOS-A_443	206	319.3	16.6	129.4	25.6	41.3	72.3	36.2	147.1	31785	171	184.4	85.3	2756	50587	22083	0
KOS-A_444	246.9	380	18.9	163.6	27.1	51.7	90.7	41.2	150.8	33082	382.2	206.8	98.9	3393	72989	27922	0
KOS-A_445	244.2	347.9	22.2	138.1	27.2	42.7	87.8	33.1	155.8	34809	357.1	247.6	88.2	3225	71501	23765	0
KOS-A_446	221.8	369.6	16.2	110.6	22.3	37.8	78.5	33	179.7	30385	282.9	231.2	88.1	3136	72658	21539	0
KOS-A_447	245.5	312.6	20.9	163.5	24.7	46.1	84	29.8	174.8	35520	382.6	252.3	107.9	3937	52583	29778	0
KOS-A_448	235.4	337.2	13.6	145	26	48.5	92.5	45.8	214.9	36112	372.8	217.5	98.6	3498	52437	26520	0
KOS-A_449	237.3	404.6	13.9	128.1	25.6	48.4	75.4	38.6	161.2	31006	450.4	194.2	59.7	2622	53941	15852	0
KOS-A_45	239.8	397.8	17.1	146.1	22.7	41.9	85.6	41	183.9	36919	328.3	304	95.5	3770	48416	25669	0
KOS-A_450	251.6	406.9	22.9	123.6	22	45.6	81.2	25.4	204.4	35501	403.5	259.1	84.5	3664	64904	22846	0
KOS-A_451	225.7	395.1	13.3	113.5	20.4	37.2	79.8	26.5	203.2	32286	312.5	262.6	76.6	3059	70519	20311	0
KOS-A_452	245.2	348.6	17.5	133.3	22.4	40	95.7	22.8	198.9	34729	367.7	248.7	88.3	3403	58495	22837	0
KOS-A_453	220.5	389.2	16	120.9	27.9	29.7	81.4	27.5	198	34027	276	159.4	77.9	2190	51861	15680	0
KOS-A_454	236.3	337.1	15.4	123.3	23.3	49.5	74.7	31.2	148.8	31206	368.5	217	59.7	2631	52967	17754	0
KOS-A_455	253.8	363.9	18.6	154.1	27.1	48.2	84.3	24.1	179.3	34600	505.2	212.3	79.8	3328	70682	23655	0
KOS-A_456	218.3	340.2	17.6	111.1	23.7	39	76.2	11.6	175.2	33426	212.6	198.7	69.6	3026	31135	19245	0
KOS-A_457	243.4	381.8	13.3	100.9	20.6	44.7	78.5	24.2	225.2	32138	477.2	260.1	66.3	2901	59792	16736	0
KOS-A_458	268.5	369.7	20.1	178.7	28.9	65.2	91.7	24.4	156	37350	358.9	192.8	101.6	3755	35496	27343	0
KOS-A_459	232.1	384.9	17.6	145.8	24.7	52.8	80.2	31	185.4	36538	367.2	218.6	92.8	3184	73435	24873	0
KOS-A_46	234.3	385.7	21.8	125.6	25.7	33	82.9	31.8	188	33905	456.7	201.8	74.4	2649	74125	19382	0
KOS-A_460	259.7	386.1	22.6	173.4	29.1	52.8	96.3	39.4	175.2	38017	297.9	255.2	106.6	3944	41145	27791	0
KOS-A_461	221.3	372.7	16.6	108.4	20.8	33.4	77.9	34.8	220.3	33023	293.2	234.2	89	3248	65366	21389	0
KOS-A_462	226	368.7	17.1	113.8	21.9	32.1	73.9	28.3	178	29636	451	189.7	62.3	2616	62793	17959	0
KOS-A_463	234.6	396.2	16.6	127.2	24.6	37.6	78.4	32.8	207.1	34392	416.8	231	75.3	2827	68374	20747	0
KOS-A_464	228.8	336.4	11.5	123.2	21.4	48.3	68.6	15.4	181.4	30392	331.6	197.4	87	3006	69940	21066	0
KOS-A_465	232.8	316.1	16.8	140.3	27.4	39.9	81.2	35.5	173.7	33098	366.1	194.4	72.1	2827	17742	17415	0
KOS-A_466	234.6	339.9	13.9	130.8	22.6	46.8	75.4	28	167.1	31050	376.1	205	73.2	3088	57868	21379	0
KOS-A_467	221.5	372.6	18.8	132.9	23.7	40.5	82.7	20.4	211.7	34137	311.1	263	86	3339	84421	26111	0
KOS-A_468	250.4	380.7	16.4	124.8	25.6	30.3	77.1	25.5	233.9	35203	474.4	251.6	67.4	2639	81782	18174	0
KOS-A_469	236.1	368	15.8	117.6	24.9	32.5	86.7	44.6	188.4	33749	420.2	258.2	92.1	3430	73167	22451	0
KOS-A_47	242.1	414.3	20.5	129.6	22.8	40.3	77.5	27.6	178	36631	265.8	246.1	70.5	2864	53939	19532	0
KOS-A_470	253.1	381.1	15.1	131.2	26.2	49.3	88.5	40.5	203.6	34982	370.9	240.8	82.7	2994	73799	21839	0
KOS-A_471	227.8	366.1	16	129.5	23.5	42.2	81.2	39.1	176.9	32754	276.3	246.2	100.2	3463	57776	25135	0
KOS-A_472	211.5	302.6	17.3	126.1	26.9	41.2	82.9	28.1	174.2	33154	409.7	165.2	69.8	2788	36035	18995	0
KOS-A_473	243.4	302.9	21.3	172.5	27.2	52.8	92.4	32.9	149.5	34518	261.9	248.6	125.1	4103	44066	32313	0
KOS-A_474	183.5	306.7	9.2	83.4	23.3	46.4	74.9	31	195.8	28053	284.1	150.6	94.5	2666	55247	18228	0
KOS-A_475	224.6	332.2	17.5	153.8	29	32.5	97.7	35.3	215.5	36805	385.5	227.3	84.1	3346	65737	26846	0
KOS-A_476	201	347.6	17.5	118.2	21.3	31.8	70.9	18.8	185.5	28843	421	143.8	57.8	2378	59592	18298	0
KOS-A_477	240.1	336.2	15.6	144.6	26.3	46	84.2	37.3	174.9	33695	365.5	251.9	103.7	3618	45615	24720	0
KOS-A_478	252.4	392.7	14.6	113.8	26.9	40.8	81	40.6	198.9	34361	318.2	281.2	75.7	3220	57796	19880	0
KOS-A_479	227.7	340.6	19.2	142.9	25.6	43	89.8	42.2	203.2	35480	359.7	271.5	107.1	3474	71621	27415	0
KOS-A_48	235.7	379.5	15.5	123	24.2	40	80.7	29.6	194.3	32522	343.4	227.5	82.7	2860	61844	18812	0
KOS-A_480	224.9	395.4	14.4	131.9	23	32.4	87.7	35.4	212	36460	339.2	258.5	84.7	3199	61889	24637	0
KOS-A_481	222.1	314	17.9	145.7	26	38.3	68	22.5	202	32016	401.8	161.8	73.3	2759	62514	23658	0
KOS-A_482	244.6	373.6	15.8	111.2	24.7	45.2	80.4	32.4	221.2	34954	312.7	243.6	79.5	2983	51109	17955	0
KOS-A_483	239.7	393.5	19.7	145.3	24.3	41.5	80.1	27.4	170.3	33317	313	209.7	94.8	3007	73134	23818	0
KOS-A_484	203.8	343.7	6.3	123.9	19.9	41.3	63.7	30.1	213	29258	284.1	301.1	82.1	3044	70003	24347	0
KOS-A_485	211.5	287.5	17.1	130.5	22.1	35.2	82.8	33.5	159.3	32959	281.1	203.8	92.5	3183	42183	21896	0
KOS-A_486	246.1	406.4	20	128.1	26.9	35.7	79.8	30.2	206.6	32452	389.6	243.4	73.7	2854	73701	21989	0
KOS-A_487	227	373.1	15.7	121.9	26.2	46.2	87.2	27	181.8	32467	400.3	216.7	73.9	3164	65973	20266	0
KOS-A_488	239.1	386.1	12.8	131	25.5	56.4	72.2	19.6	176.2	32265	371.5	199.8	79.4	3126	61994	21984	0
KOS-A_489	230.6	387.9	16.9	109.1	21.8	35.9	78.6	26.4	221.4	32448	310.6	251.2	97.1	2988	83423	21334	0
KOS-A_49	264.4	417.6	23.7	165.5	25.4	32.8	91.4	29.9	250.9	40770	592.5	306.9	84.6	3405	89880	25888	0
KOS-A_490	253.5	374.8	17.1	107.8	22.8	34.9	80.7	29.5	231.9	35111	395.5	303.2	88.6	3308	91349	17781	0
KOS-A_491	213.4	344.2	15.1	104.7	23.6	35.2	79.6	34.3	224.9	31666	445.5	268.9	84.8	3043	96004	21361	0
KOS-A_492	244.5	374.8	15.7	131.6	25.6	41.8	78.2	31.7	212	33643	313.5	247.3	76.5	3273	37060	21045	0
KOS-A_493	235.3	382.7	18.3	148.7	25.2	43.8	74.2	36.3	218.2	36261	451.2	244.1	87.3	3236	67402	24767	0
KOS-A_494	214.7	370.1	12.3	140.4	24.1	34.9	89.5	45.2	238.9	35566	429.8	273.6	109	3311	63267	26012	0
KOS-A_495	267.7	391.8	26.6	160.5	27	55.3	90.3	27.5	157.8	38209	284.3	214.9	104.1	3900	40480	26143	0
KOS-A_496	241.2	319.6	15.3	136.2	27.4	48.2	88.4	39.8	233.3	36519	352.8	234.2	94.7	3523	65469	25208	0
KOS-A_497	227.4	375.3	22.6	131.1	22.7	34.4	79.4	26	206.4	35978	494.2	223.4	83.1	2757	60617	19532	0
KOS-A_498	244	355.8	18.4	139	26.9	65.7	97.5	37.7	181.8	38080	426.5	235.3	99.4	3797	58391	26115	0
KOS-A_499	249.2	371	21.5	132.9	28	37.7	90.6	40	197.7	36716	380.9	265.9	81.9	3309	40439	21194	0
KOS-A_5	221.7	347.7	18.3	143	23.9	36.9	81.4	24.8	180.3	33943	459	164.3	67.9	2289	43910	17303	0
KOS-A_50	244.9	407	13.3	113.7	23.4	51.2	73.4	18.1	182.1	30945	349.1	219.1	69.3	3035	77040	20590	0
KOS-A_500	252.9	397.4	18.7	120.1	24.8	38.9	81.9	34	180.3	34377	195.3	283.5	83.8	3569	57441	21646	0
KOS-A_501	254.2	380.6	18	136.9	24.9	54.2	83.8	25.5	171.4	34204	384.3	173.9	79.5	3181	44959	20631	0
KOS-A_502	238.8	383.1	16.1	111.9	23.1	37	82.6	27	205	35583	260.9	279.1	95.3	3223	81291	20805	0
KOS-A_503	227	366.9	15.6	117.3	26.4	30.5	82.6	28.1	227.1	32505	503.6	244.9	75.7	2755	102069	21591	0
KOS-A_504	220	312.3	12.8	139.6	26.4	46.9	85.7	26.2	141.7	32185	293.9	188.5	90.7	3142	44015	22832	0
KOS-A_505	226	372.2	17.7	110.1	24.6	42.3	71	32.7	146.2	31336	241.3	210.7	65.9	3077	43414	18716	0
KOS-A_506	232.2	402.3	14.5	116.7	22.8	46.5	76.3	35.3	209.4	32880	325	232.5	96.7	3263	69473	21484	0
KOS-A_507	228.8	345.6	17.7	117.9	26.7	39.1	80.7	20.7	201.5	33821	369.2	227.3	74.9	3047	62565	21273	0
KOS-A_508	233.2	385.1	16.9	116.4	24.3	36.4	80	27.1	196.6	33288	295.8	274.3	82.6	3261	67261	21086	0
KOS-A_509	223.7	362.1	13	105.2	22.5	44.1	63.2	35	204.1	31026	451.8	241.5	59.2	2448	79528	17194	0
KOS-A_51	196.9	390.3	15.6	114.5	23.4	35.7	66	27.3	165.1	29365	279.6	172.7	74.3	2501	71587	19346	0
KOS-A_510	235.5	378.7	19.9	140.6	25.9	50	89.7	25.8	196.3	34553	440.8	237.2	94.5	3434	68443	23850	0
KOS-A_511	242.3	381.5	14.8	124.1	19.8	51.6	63.4	19.5	146.7	31487	285.1	224.1	70.2	3079	58906	19993	0
KOS-A_512	261	333.2	21.8	142.1	25.1	52.6	84.8	33.1	170.8	34935	366.6	220.6	83	3532	51679	25753	0
KOS-A_513	223.6	345.7	12.6	118.8	24.7	41.8	82.8	37.1	191.7	32170	458.9	175.5	68.7	2958	60497	20490	0
KOS-A_514	244.4	359.6	14	145.3	26.3	38.7	76.4	20.6	207.5	33015	428.6	221.5	63.1	2948	75961	23131	0
KOS-A_515	224.8	397	15.2	130.1	25.9	34.2	80	31.4	206.7	37367	396.6	273.4	98	3432	88451	26087	0
KOS-A_516	253.9	361.5	17	147.2	27.7	51.4	95.5	34.4	174.7	32916	377.9	220.6	84	3516	37040	22805	0
KOS-A_517	213.1	382	12.8	111	25.8	30	73.5	29	202.7	30786	329.4	172.1	63.3	2301	60737	16711	0
KOS-A_518	214.9	348.6	11.4	111.5	25.3	35.6	70.9	27.1	194.9	30512	361.7	239.2	74.8	2863	64727	17258	0
KOS-A_519	221.3	290.8	16.2	134.7	24.9	31.3	92.5	34.3	185.3	37338	375.7	271.7	92.1	3448	18478	23180	0
KOS-A_52	245.2	451.8	17	121.1	26.3	34.7	83.6	18.1	218.1	35527	324	238.9	74.1	2729	88235	19917	0
KOS-A_520	234.9	398.6	14.2	113.6	25.5	43.5	78	27.3	190.1	34755	345.5	253.7	79.4	2830	70543	17899	0
KOS-A_521	215.4	327.9	16	123.9	25.8	53.4	83.5	35.8	176.4	31609	262.7	194.1	89.2	3215	48595	22910	0
KOS-A_522	248.5	425.7	21.6	145.2	23.4	40.2	80.7	36.1	181.3	35413	281.9	247.9	95.8	3679	67780	26938	0
KOS-A_523	223.5	362.7	25.7	137	26.5	39.5	86.4	35.3	184.8	35857	436.5	184.3	67.1	2490	54893	19058	0
KOS-A_524	219.3	354.5	16.4	140.4	24.2	44.2	73.3	27	199	33336	321.6	170.5	92.1	2993	52806	22447	0
KOS-A_525	233.5	328.6	18.1	138.8	27.2	36.8	80.2	32	148.4	27690	381.8	156.2	84.8	2763	69259	21648	0
KOS-A_526	224.8	381.6	18	125.4	25.6	32.2	79.5	29.4	179.9	34103	318.3	233.8	86.1	2906	72649	21206	0
KOS-A_527	205.9	330.3	12.1	109	22.7	43.7	82.6	34.1	193.4	27331	408.7	202.6	82.9	2490	78468	17477	0
KOS-A_528	244.2	405.9	19.8	147	23.7	45.6	79	27.6	184	33826	424.3	207.4	73.4	3048	73062	24174	0
KOS-A_529	258.7	400.3	16.1	120.8	26.3	51.8	79.5	19.2	191.4	35604	350.1	252.9	79.7	3189	72619	19991	0
KOS-A_53	213.7	322.3	18.2	143.1	26	45	92.2	31.7	176.6	32144	471.6	182.7	88.2	2997	67019	23365	0
KOS-A_530	243.7	374.9	19	145.9	25.3	51.9	82.7	25.9	184.1	31452	308.4	199.2	92.8	3042	75688	25228	0
KOS-A_531	257.8	376.6	19.7	161	27.3	42.7	91.8	42.9	191.3	37798	469.9	267.1	97.5	3467	55487	24184	0
KOS-A_532	244.7	335.6	19.2	154.2	27.7	45.9	88.8	35.3	221.3	36896	499.3	242.3	87.5	3207	52378	23474	0
KOS-A_533	242	391.3	14.7	138.7	24.6	60.9	75.5	32.1	152.3	30649	312	185	74.6	3136	69790	25122	0
KOS-A_534	246.1	383.8	17.5	159.7	27	51.5	89.8	33.5	224	39087	397	236.9	82.7	3399	69332	26688	0
KOS-A_535	205.4	350.9	16.2	124.8	26.2	30.8	79.3	25.7	196.1	30537	419.5	222.4	74.5	2800	77741	22314	0
KOS-A_536	232.5	365.5	16.6	129.2	25.3	40	78.8	32.7	161.6	31650	307.6	243.5	96.3	3180	52399	21695	0
KOS-A_537	268.7	396.7	22.7	157	22.7	60.2	82.2	30.9	175.3	37309	305.9	253	104.4	4108	63679	30122	0
KOS-A_538	229.3	363.8	17	109.9	25.1	37.8	83.7	47.2	164.8	32580	184.4	215.3	101.4	3387	73148	21964	0
KOS-A_539	242.6	374.7	18.9	122.8	24.6	43.3	86.7	26.1	189.7	34365	408.3	253	91.6	3456	69988	22190	0
KOS-A_54	245.2	376.7	23.7	122.5	22.4	32.1	79.9	18.7	159.6	31444	208.9	228.8	90.3	2969	93787	22733	0
KOS-A_540	230	325.2	18.2	155.1	26.5	47.1	94.2	48.6	206.1	37237	446.4	280.4	98.1	3651	41445	26373	0
KOS-A_541	245.7	348	17.8	164.6	26.6	56.7	88.9	25.2	185.4	35997	518.1	197.1	101.4	3336	47996	24548	0
KOS-A_542	195	322.5	10.9	102.4	23.5	32.2	87.7	32.2	235.1	33167	348.9	255.1	75.5	2907	57792	20419	0
KOS-A_543	207.8	332.9	15.4	118.8	24.2	37.5	82.3	32.7	211.8	33993	377.2	177.5	72.4	2489	65176	18400	0
KOS-A_544	243.3	372.2	16.2	119.3	25.7	33.7	84	26.9	185.4	33804	411	245.6	83.3	2850	78096	20381	0
KOS-A_545	224.5	366.4	13.1	125.9	22.7	42	88.6	37.8	224.7	36336	448.7	331	96.4	4126	56275	26984	0
KOS-A_546	240	363.5	19.1	166.3	23	49.4	70.7	29.9	239.6	36012	468.6	257.7	92.7	3675	60572	28061	0
KOS-A_547	227	349.7	14.8	123.2	24.3	39.7	87.3	40.4	240.2	33987	539.9	287	85.9	3261	93592	23291	0
KOS-A_548	224.1	387	16.9	118.4	21.1	45.8	71	33.7	199.6	30836	354.5	235.1	81.6	3037	96785	23495	0
KOS-A_549	245.2	415.3	13.8	100.5	22.9	41.5	80.2	29.5	188.7	33418	260.8	231.4	71.8	2986	51998	16744	0
KOS-A_55	267.1	424.3	20.1	143.9	29.9	40.5	88	26	190.1	39810	378.7	214.7	87	3152	47151	21207	0
KOS-A_550	208.1	377.2	12.9	114.3	24.6	33.3	76.3	31.9	212.7	33276	368.5	223	68.7	2303	61584	15064	0
KOS-A_551	217.3	314.6	19.2	135.5	25.5	50.2	77.9	35.8	135.6	30037	326.6	156.4	81.4	2937	60319	22637	0
KOS-A_552	232.6	373.3	19	150.1	27.4	40.5	86.5	28	178.1	35473	452.9	223.8	97.5	3442	64850	25265	0
KOS-A_553	235.8	329.7	12.3	125.9	23.4	44.4	72.5	34.7	173.2	29481	358.9	212.2	91.9	3308	44879	20632	0
KOS-A_554	236.7	394.3	13.7	101.7	24.3	39.2	73.4	27	179.2	28581	268.3	216	67.5	2714	67318	16545	0
KOS-A_555	240.3	373.5	17.4	131.3	26.1	39.3	83.8	30.3	182	34363	424.2	246.6	97.1	3220	64234	20416	0
KOS-A_556	235.6	335.3	20.6	147.5	27.2	45.5	85.1	28.9	178.1	36655	389.6	190.3	103.7	3545	47943	25587	0
KOS-A_557	269.3	423	20.7	146.4	26.2	57.5	78.1	27.7	157.4	34497	356.8	169.7	89.7	3532	70279	25463	0
KOS-A_558	236.9	334	16.9	156.1	28.2	37.5	81.7	36.1	182.5	35297	380	258.9	75.8	3334	50891	26980	0
KOS-A_559	264.3	391	16.2	119	24.3	52	86.8	23.1	193.4	33629	429.6	257.7	82.3	3160	73996	19409	0
KOS-A_56	219.4	351.6	12.9	146.2	25.1	41.3	84.4	39.2	199.7	36319	432.6	273.1	94.9	3521	63559	26177	0
KOS-A_560	203.3	369.6	12.9	122.8	21.8	44.7	67	38.9	183.9	31810	414.1	199.1	84.6	2777	72268	20738	0
KOS-A_561	226	346.2	10.5	102.8	25.1	46	80.5	34.4	169.7	28340	392.1	210.6	82.2	2906	60093	18199	0
KOS-A_562	204.6	318.2	16.1	123.7	23.3	28.5	69.1	37.9	217	33999	465.8	280.9	69.5	2831	60444	19753	0
KOS-A_563	217.5	396.4	13.7	126.8	20.7	40.5	73.3	44.3	232.3	35816	574.1	289.6	90.2	3336	72325	22230	0
KOS-A_564	231.5	351.7	15.9	138.8	25.8	41.7	84.3	38	191.1	31105	372.1	201.1	73	2619	68855	21976	0
KOS-A_565	224.3	353.5	21.9	145.8	25.4	42.5	77	23.9	189.2	35103	382.7	220.5	95.5	3330	74650	27316	0
KOS-A_566	226.6	400.6	14.2	136	28.2	41.5	83.2	26.4	204.9	36950	275	201.8	100.7	3285	46845	21339	0
KOS-A_567	227.3	325.4	11.6	135.5	27.4	40.4	87.1	33.1	195.9	37740	462.9	257.7	97.5	3582	46799	22436	0
KOS-A_568	220.2	354.2	18.1	132	23.1	32.8	77.4	22.7	211.1	34962	442.6	193.7	69.5	2817	51117	19136	0
KOS-A_569	212	373.2	15	106.5	22.1	24.8	79.3	32.8	207.1	33403	378.7	237.3	90.8	2411	59282	16032	0
KOS-A_57	237.9	305.9	14.1	121	24.9	52	84.8	25.6	141.5	28904	366.5	208.9	67.3	2568	55045	18533	0
KOS-A_570	231.5	343.4	14.5	134.6	25.3	36.1	80	32.4	224.3	34961	532.1	291.6	65.5	3014	60808	19626	0
KOS-A_571	241.3	323.3	20.8	124	23.2	41.6	77	22.9	228.9	36161	391.8	280.9	97	3694	48087	23988	0
KOS-A_572	261.9	393.2	19.6	172.2	28.7	54.2	96.8	32.6	203	42141	355.5	291.2	113.3	4321	51208	32720	0
KOS-A_573	218.8	362.6	18	133.1	25	41.5	76.7	36.6	186.4	32153	281.9	187.2	76.6	2470	69278	21065	0
KOS-A_574	234.9	391	18	100.6	22.3	38.6	82	16.6	169.2	29652	321.1	217.3	74.1	2773	85908	18624	0
KOS-A_575	245.7	358.6	16.8	129.1	25.4	52.1	80.8	32.6	184.5	32779	401.4	264.9	66	3311	58808	22269	0
KOS-A_576	233.1	373.7	15.2	135.6	27.6	41.5	83.8	32.5	195.1	37386	505.8	231.7	82.4	3150	64677	21932	0
KOS-A_577	263.7	426.7	19.6	135.1	25.3	46.2	80.9	21.9	130.3	32874	170.5	137.6	72.4	2964	46643	19918	0
KOS-A_578	246	378.9	19.4	140.2	24.5	50.2	86.2	30.9	175.5	33371	394.1	213.8	83.8	3239	67104	23263	0
KOS-A_579	217	349.8	11.8	96.3	22.5	33.5	73.5	23.7	174.3	28871	309.6	270.5	84.4	2822	88495	17318	0
KOS-A_58	216.4	313	21.1	114.2	25.3	33.9	87.3	43.1	220.6	32019	479.3	238.2	83.3	3080	88914	21084	0
KOS-A_580	230.6	379.3	13.4	114.2	24	45.2	75.3	21.7	135.6	30520	236.2	172.7	59.2	2442	58836	16254	0
KOS-A_581	226.1	348.5	14.6	125.6	25.3	36.3	67.9	25	190.1	30782	365.3	180.4	58.2	2510	50520	18047	0
KOS-A_582	199.1	324.3	10.7	117.2	21.6	36.3	66.3	30.2	190.3	30466	445.5	235.6	77.8	2709	57369	18696	0
KOS-A_583	232.4	325.8	18.9	147.3	24.9	54.7	85.9	21.2	173.9	34033	440.2	179	80	3452	45324	23987	0
KOS-A_584	246.8	400.5	21.9	127.5	25.1	42.4	76.4	27.6	197.5	33093	432.1	204	67.6	2888	78565	19553	0
KOS-A_585	229	347.1	9.6	117.8	22.2	44	86.8	35.1	209.9	31624	440.4	239	71	2785	56823	18391	0
KOS-A_586	221.4	371.4	15	128	22.9	43.9	72.1	26.7	193	32701	394.1	207.9	67.1	2597	71609	20587	0
KOS-A_587	224	360.2	19.4	125.7	26.1	44.7	76.9	33.6	185.8	31654	369.8	160.6	67.9	2864	74329	23493	0
KOS-A_588	237.4	338.7	15.9	130	23.1	52.5	77.5	26.7	210.9	30818	464.4	237.9	78.6	3263	82419	24284	0
KOS-A_589	243.3	374	17.2	134.5	23.7	46.4	77.5	33.9	172	30940	260.2	225.7	94.5	3179	86471	24213	0
KOS-A_59	236.2	426.7	20.1	123.7	22.5	42.5	71.7	33	172.9	30488	256.7	194.6	71.4	2756	85483	21736	0
KOS-A_590	220.3	343.2	14.2	119.5	22.6	33.8	70.9	29.8	195.6	30433	305.1	233.4	86.5	3189	72386	21665	0
KOS-A_591	263.5	371.2	17.2	156.8	25	55.3	78.4	12.5	188.8	36085	367.4	203.9	101.2	3758	51719	25983	0
KOS-A_592	261.2	399	15.5	129.9	25.4	44.7	81.2	20.7	193	32057	471.3	246.6	59.7	2689	70448	18361	0
KOS-A_593	281.1	444.1	20.9	143.3	24.9	45.7	89.5	26.2	177.1	36837	242.2	249.4	94.5	3545	57041	22782	0
KOS-A_594	224.8	303.5	21.1	153.8	25.6	47.2	93.5	37.6	178.5	32285	532.9	204.1	88.6	3158	56871	24206	0
KOS-A_595	217	372.5	18.8	135.2	24.9	36.8	84	31.7	198.2	34204	493.7	214.1	73.3	2818	74689	21429	0
KOS-A_596	235.5	387.5	19.8	135.6	21.7	42.6	78.8	23.6	194.6	35135	371.5	232.9	74	3402	53691	23447	0
KOS-A_597	220.4	329.5	16.1	99.6	24.1	36.3	68.8	29.5	198.2	30697	330	268.7	78.1	3218	77922	22055	0
KOS-A_598	217.1	282.3	18.5	136.9	26.7	42.5	83.1	28.5	151.3	30383	418.5	174	62.6	2662	48407	20241	0
KOS-A_599	217.5	342.3	20.8	135.5	25.7	50.3	85.1	33	168	37829	308.2	207.6	90.9	3462	44805	22947	0
KOS-A_6	240.6	367.8	18	105.8	21.8	43.9	80.3	30.1	201	32511	342.8	265.7	80.9	3398	79058	22515	0
KOS-A_60	215.6	367.5	12.2	104.6	18.7	44.5	71.3	33.9	188.8	29221	351	308.6	70.8	3129	73825	19497	0
KOS-A_600	213.4	334.6	18.3	126.4	25.5	36.1	75.9	28.8	159	30285	331.6	188.6	69.9	2807	64892	21784	0
KOS-A_601	252.8	415.2	22	148.6	25.6	51	85.3	34.8	169.9	35976	391.8	223.9	85.5	3714	68941	25875	0
KOS-A_602	244.7	386.2	16.4	135.2	25.6	55.3	91.7	27	208.4	33049	365.2	171.4	84.1	2829	72824	22985	0
KOS-A_603	232.4	351.9	15.2	133.9	28.5	42.1	86.6	36.4	174.6	31502	414.7	200.9	79.4	2827	61400	20963	0
KOS-A_604	238.1	348.9	13.5	123.8	23.4	47.6	78.3	35.5	203.2	31807	567.2	212.6	83	3274	65054	20547	0
KOS-A_605	249.2	323.4	21.4	144.9	26.3	53.1	82.8	26.5	135.2	31233	376.2	159.4	73.2	3078	48480	21126	0
KOS-A_606	236.5	349.2	16.9	132.3	26	44.3	88.3	21.3	206.2	35694	304.4	233.8	82.3	2856	61759	21053	0
KOS-A_607	215.6	346.9	10.4	111.2	20.8	45	75.7	31	210.1	32015	440	269.5	70.1	3081	62803	19750	0
KOS-A_608	220.8	332.7	17.2	122.8	23.9	34.5	84.9	38.8	164.9	35184	315.8	303.8	97.2	3829	57522	27256	0
KOS-A_609	217.5	334.3	12.7	141.6	25.9	49.4	91.3	29.2	176.1	33617	350.7	219.4	85.8	3517	61522	26818	0
KOS-A_61	238.5	385.6	18.9	143.7	25	38.1	93.5	29.1	205.5	36722	268.6	232.3	93.1	3069	50127	22314	0
KOS-A_610	220.3	335.8	12.6	107.3	20	35.8	66.4	22.8	174.6	28505	397.9	225.3	68.5	2856	74752	18268	0
KOS-A_611	246	369.5	23	141.9	26.4	38.2	77.5	33.1	177.3	35135	301.5	226.3	79.2	3196	56673	22365	0
KOS-A_612	259.1	421.9	24.7	162.1	29.8	48.2	86.3	16.1	173.9	36641	369.2	197.2	94.6	3209	76383	26233	0
KOS-A_613	230.2	347.4	15.3	97.8	26.5	24.4	87.4	40.2	214.3	29957	499.4	239.8	47.7	2101	72201	11119	0
KOS-A_614	212.7	356.7	11.5	128.1	26.6	45.5	88.1	29.2	218.5	32021	428.6	200.4	58.3	2631	63988	21085	0
KOS-A_615	261.5	439.6	17.8	133.6	24.9	44.7	76.1	24.1	197.7	33981	360.6	215.3	71	3017	64097	20648	0
KOS-A_616	258	401.7	22.6	117.9	24.2	25.4	84.5	25.3	192.1	35754	351.9	252.7	73.5	2999	63285	16645	0
KOS-A_617	243.8	403.2	16.4	126.7	28.8	49.4	81.8	25.1	199.2	37508	338.9	175	93.8	3233	70391	23152	0
KOS-A_618	222.5	383.9	18.2	140.9	23.6	41.3	80.4	32.8	249.9	37398	546.6	237.7	83.5	2942	65303	23823	0
KOS-A_619	234.3	391.3	8.8	86.2	18.5	45.6	72.7	19.1	186	29984	368	293.9	74.7	3174	80827	16687	0
KOS-A_62	233.3	382.7	15.4	110.9	22.5	39	76.7	33.1	214.6	33659	301.6	272.7	89.8	3206	83504	20373	0
KOS-A_620	217.6	329.6	11.8	115.2	24.7	41.6	81.8	24.1	193.4	32277	267.4	218.3	83	2929	64560	19772	0
KOS-A_621	252.4	397.5	16.8	125.2	23.6	54.4	84.5	36.6	181.4	33131	394.2	254.2	89.3	3594	67999	21510	0
KOS-A_622	239.3	373.8	17.8	124.6	25.7	47.9	88.9	32.4	169	32474	342.9	194.1	82.4	3526	69375	22895	0
KOS-A_623	251.8	391.4	18.1	123.2	24.6	48.3	87.9	18.4	215	37804	402.2	295.2	87.9	3667	77983	23175	0
KOS-A_624	219.6	370.7	16.1	138.2	25.2	35.9	77.8	29	207.5	35165	404.4	216.2	80.6	2833	62614	21849	0
KOS-A_625	254.8	359.1	21.1	132.3	28.7	51.2	92.6	37.5	190.4	34940	330.6	250.8	90.6	3672	54507	25221	0
KOS-A_626	265.9	385.4	16	149.2	24.7	50.1	82.5	22	159.1	33633	354.7	229.5	95.9	3582	52955	25566	0
KOS-A_627	208.6	380.7	20	113.7	22	40.6	77.9	29.7	196.3	32518	379.5	245.8	83.5	3093	79828	22156	0
KOS-A_628	246.7	341.8	11.7	131.2	24.5	54.7	77.7	28.2	191.2	34916	299.1	196.7	77.4	3400	34331	19923	0
KOS-A_629	259.3	367.9	16.6	134.8	27.1	46.6	92.3	29.9	207.3	35934	319.6	225.2	90.8	3359	52230	22548	0
KOS-A_63	258.6	380.9	19.6	147.3	25.4	57.1	79.3	34.5	151.3	35806	248.4	240.1	90.1	3513	43700	24993	0
KOS-A_630	248.2	381.7	14	117.6	26.8	40.5	85.2	39.4	226.6	32536	388.2	260	92.8	3286	81950	21571	0
KOS-A_631	238.1	382.2	14.3	129	23.4	42.9	80.4	31.8	212.6	35560	359.2	242.7	69.9	3216	66507	21972	0
KOS-A_632	217.4	294.3	20	147.4	23.2	44.4	84	34	189.4	30182	526.7	208.9	65.9	3099	62066	25000	0
KOS-A_633	225.7	427.5	14.3	123.1	23.7	28.7	67.6	28.7	173.2	30564	311.2	219.1	67.8	2337	77922	19481	0
KOS-A_634	256.8	403.1	17.3	142.4	24.2	51.3	78.9	23.7	199.1	34292	496.6	203.7	72.7	2810	69041	19350	0
KOS-A_635	229.2	346.7	17.8	139.2	24.3	39.1	76.1	27.8	208.1	32034	487.4	173.3	63.6	2511	58541	18619	0
KOS-A_636	236.1	385.4	17.9	155.1	26.8	37.2	95.6	37	203.1	37007	391	260.4	92.9	3405	44148	24050	0
KOS-A_637	230.1	347.3	22.3	121.7	28.2	32.9	99.1	24.3	213	39660	355.3	235.3	86	3425	58799	22831	0
KOS-A_638	241.7	372.3	21.6	138	24.1	38.4	83.3	29.6	202.2	38114	433.6	257.7	84.8	3453	86669	24252	0
KOS-A_639	225.4	344.6	11.3	118.4	24.3	41.6	67.6	40.5	203.7	30785	418.3	244.7	103.8	3221	54398	19902	0
KOS-A_64	240	350.8	19.8	143.9	24.8	60.6	79.3	22.8	147.3	31010	318.5	142.4	71.4	2992	51641	22574	0
KOS-A_640	211.5	350	11.1	99.4	24.9	23.2	79.3	44.8	251	31000	649.7	229.6	78.4	2746	83355	17123	0
KOS-A_641	244.3	413.2	18.3	151.2	25.9	33.6	87	30.3	181.7	37500	294.6	282.6	88.6	3544	55948	24502	0
KOS-A_642	256.5	383.5	22.3	154.6	27.8	38.1	93.3	25.4	217.6	42663	404.8	293	115.9	3642	69384	28116	0
KOS-A_643	235.5	353.6	15.7	152	24.9	47.2	81.3	37.1	192.9	38109	289	247.2	87.2	3463	52380	24696	0
KOS-A_644	252.4	400.6	18.7	145.7	25.6	34.5	85.7	34.1	226.2	35017	401.9	286.4	80.7	2883	61717	21491	0
KOS-A_645	238.9	366.9	14.7	119.5	23.3	42.6	85.5	30.2	209	34245	392.2	282.3	96.4	3502	75462	23174	0
KOS-A_646	252.7	386.1	18.7	128.4	23	51.7	75.9	35.9	156.8	32722	261.5	241.4	99.3	3735	72991	25417	0
KOS-A_647	216.5	351.6	8	121.7	25	44.3	89.4	42	206.2	32566	447.6	245.3	81.1	3056	53315	20063	0
KOS-A_648	275.2	393.6	16	144.2	29	55.6	96.7	25.4	176.7	38364	265.9	225.9	95.4	3961	50015	26018	0
KOS-A_649	221.9	369.4	16.3	111.8	24.1	32.3	82.1	28.3	186.7	31005	351.5	232.1	91.7	3173	77532	21435	0
KOS-A_65	244.3	406.4	19.1	156.2	25.1	54.3	90	38.3	195.4	37128	403.7	256	90.9	3578	58913	28090	0
KOS-A_650	226.9	385.2	20.8	145.6	23.8	33.8	90.1	30.4	173.5	36225	372	260.3	71.5	3245	63170	24009	0
KOS-A_651	222.2	368.3	13.4	109.3	18.9	43.2	77	27.7	188.7	30186	339.8	289.6	76.8	3059	79849	20627	0
KOS-A_652	285	437.1	25.5	160.4	27	57.6	77.4	28.6	149	35408	249.3	219.4	94.6	3524	51142	26227	0
KOS-A_653	245.5	358.1	21.6	150.8	24.9	48.8	83.3	30.3	149.5	32165	379.6	224.9	91.5	3540	55626	26822	0
KOS-A_654	228.2	336.7	8.3	116.3	22.2	51.3	73.4	36	193.2	30499	449.2	274.4	87.7	3443	67046	21436	0
KOS-A_655	245.7	392.1	21.9	138.5	25.9	38.1	82.2	19.4	202.8	38110	331.3	251	103.5	3596	81689	26438	0
KOS-A_656	236.5	402.2	18.8	127.6	26.1	41.9	80	23.1	184.8	33475	387.4	175.8	70.5	2593	78963	19315	0
KOS-A_657	247	394.8	23.3	138.3	25	33.6	76.3	26.2	190.2	34313	373.2	254.1	74.3	2968	64558	21793	0
KOS-A_658	264.3	401	14.1	125.2	24.2	42.8	86.1	25.6	218.7	36320	360.5	268.9	88.1	3289	62253	19889	0
KOS-A_659	222.7	291.5	16.9	145.1	24.7	41.6	87.4	22.6	214.6	35699	519.5	242.9	76.5	3213	46612	23145	0
KOS-A_66	248.5	369.3	15.2	123.4	27.2	40.6	76.6	28.1	211.3	34476	399.1	256.8	70.6	2951	69620	19765	0
KOS-A_660	225.2	354.9	15.3	134.5	22.8	52.8	76.7	33.5	203.1	32442	415	186	69.9	2942	63380	21587	0
KOS-A_661	235.3	384.9	13.7	111.7	21.9	38.9	73.3	27	206.6	29022	494.8	280.5	80	3135	116182	21877	0
KOS-A_662	251.8	344.4	15.3	136.7	27.3	53.9	84.1	29.4	179.8	36251	273.7	264.1	95.3	3559	64485	22848	0
KOS-A_663	212.3	350.7	11.7	100.4	21.1	46.9	63.6	16.3	151.5	28293	363.3	191.5	77	3030	79738	18226	0
KOS-A_664	210.9	366	17.6	129.1	23.3	44.9	87.6	34.4	204.8	33330	364.5	188.3	82.4	2832	52822	19951	0
KOS-A_665	226.1	357.9	18.1	121.2	26.4	44.4	79	25.6	142.1	31055	249.7	133	76.6	2883	57539	20654	0
KOS-A_666	241.1	350.7	15.7	129.2	25.2	48	86.6	28.7	179	34416	347.7	223.4	87.1	3246	40452	21011	0
KOS-A_667	217.3	323.3	9.2	131.2	24.6	39.7	77.3	38	204.3	33096	421.8	215	84.6	2979	64899	21306	0
KOS-A_668	226.2	328.2	13.5	123.4	25	34.4	93.9	39.2	216.8	33807	440.4	277.1	79.9	2945	49290	18528	0
KOS-A_669	217.6	389.7	17	118.8	21.8	30.5	69.9	34	190.4	36007	278.2	302.7	100.1	3272	88276	24520	0
KOS-A_67	237.6	434.6	16.6	114.6	26.5	36.5	76.9	39.2	225.6	37106	354.1	243.8	89.1	3179	72293	20612	0
KOS-A_670	234.1	363.3	12.6	134.1	23.9	54.2	84.2	33.4	205.6	33570	441.1	221.7	93.4	3541	69485	24462	0
KOS-A_671	250.4	378.9	19.6	134.8	24.8	49.4	81.2	20.5	160.1	33518	241.4	183.6	96.8	3289	55074	21795	0
KOS-A_672	239.2	396.1	15.5	118.3	22.4	41.1	81.4	27.6	182.4	33823	328.4	274.4	93.1	3261	75110	22500	0
KOS-A_673	215.4	394.8	11.4	106.9	23.9	38.2	84	35.5	185.4	33126	196.4	245.1	83.1	3156	47481	20096	0
KOS-A_674	232.4	373.2	20.8	141.3	25.7	43.7	79.9	17	174.6	34943	345.7	167.3	82.7	2849	64175	22212	0
KOS-A_675	264.4	399.3	19.1	151.5	26.9	43.2	89.3	30.9	209.3	38585	375.8	259.5	88.2	3368	44746	22124	0
KOS-A_676	225.3	338.1	15.5	141.2	25.3	51.8	84.7	34.3	138.2	28530	285.8	145.9	80.3	2693	41515	19988	0
KOS-A_677	247	390.1	18.3	133.4	26.7	36.7	85.4	34.1	169	33299	375.3	239.7	84	3030	88246	22163	0
KOS-A_678	239.5	370	19	118.6	26.5	48.7	81.5	27.5	180	35045	334.8	208.1	95	3203	76133	19989	0
KOS-A_679	262.6	394.2	19.4	154.6	28.8	52.7	90.1	23	194.4	39896	263.5	225.6	107.6	3581	53027	25769	0
KOS-A_68	222.2	350.3	19.8	141	23.4	50.8	83.6	22.8	178.6	34265	446.5	183.5	88.3	3141	72089	23709	0
KOS-A_680	211.2	321.3	14.9	108.4	24.6	33	91.8	34.2	191.9	31891	423.2	222.6	90.5	3042	79551	22130	0
KOS-A_681	215.8	388.7	16.6	149.5	24.5	43.7	79.1	28.2	183.6	34220	351.7	210.4	90.7	3279	61356	26742	0
KOS-A_682	229.4	323.2	13.8	130.6	23.8	46.9	84.9	47.1	193.1	28492	484.1	191.6	77.1	2683	63039	18978	0
KOS-A_683	240.8	390.9	19.5	132.8	23.3	38.5	76.2	19.9	179.1	31804	312.5	226.6	81.2	3044	59513	22338	0
KOS-A_684	195	338.2	13.8	126.2	22.8	39.5	73.9	28.9	197.3	30009	337.7	153.4	76.6	2533	62668	20791	0
KOS-A_685	247.8	354.7	17.1	149	23.2	53.8	79.3	26.9	172.2	35436	336.1	216.5	101.8	3766	52476	24977	0
KOS-A_686	255	394	18.8	147.5	26.3	41.9	85.6	25.4	192.4	34613	438.4	213.9	66.7	2842	75344	24385	0
KOS-A_687	249.7	359.6	17.8	136.6	27.6	56.6	87.8	18.9	154.7	34813	418.6	126.7	87.4	3238	65011	23748	0
KOS-A_688	264.1	374	16.8	154.3	23.2	57.4	82.3	32.7	183.7	36963	435.6	309.9	105.3	4097	63422	28231	0
KOS-A_689	221.7	339.7	11.5	124.6	24.2	39.9	80.6	37.2	222.4	32459	501.4	271.3	71.7	3171	76496	22799	0
KOS-A_69	230.6	391.4	15.9	106.6	23.7	36.6	80.8	37.8	182.3	32725	277.1	256.2	88.7	3256	80457	23262	0
KOS-A_690	249.3	410.3	20.1	150.9	22.8	42.7	83.8	15.5	194.7	37583	398.7	229.6	86	3200	82582	25341	0
KOS-A_691	239.3	327.5	20.5	157.4	27.8	58.8	85.9	34.6	139.7	32030	313.7	163.2	88.8	3333	28489	24120	0
KOS-A_692	232.4	344.9	18.8	148.7	22.3	42.5	80.3	20.5	134.4	33691	200.4	247.1	101	3948	51121	27405	0
KOS-A_693	261.4	360.5	25	132.9	26.3	35.8	88	37	193.6	34924	285.3	255.4	105.6	3482	67214	23978	0
KOS-A_694	230.9	339.1	15.6	125.7	25.1	33.3	82.7	38.4	181.9	34323	395.1	264.1	100.2	3553	65510	22869	0
KOS-A_695	237.4	345.4	15.4	130.4	25.7	33.7	80.1	23.2	192.2	32902	412.6	250.9	71.5	2788	62938	20130	0
KOS-A_696	247.9	410.4	19.4	133.8	25.4	44.2	87.1	32.8	157.1	34974	368.8	195.5	67.9	3209	68688	21790	0
KOS-A_697	232.5	383.8	18.2	124.8	23.8	41.5	86.2	23.5	175.7	33651	287.8	200.5	79.1	2832	61487	19649	0
KOS-A_698	226.7	344.2	18.7	131	24.4	50.9	88.4	25	199.7	34101	375.2	184.7	94.3	2908	74876	22218	0
KOS-A_699	225.9	340.6	13.2	105.5	27.1	47.7	93.2	42.9	245.7	35942	530.5	266.2	72.5	2900	74049	17563	0
KOS-A_7	240.2	383.9	13.4	127	23	44.4	73	22.5	205.4	30428	357.4	238.8	73.5	3062	65749	21067	0
KOS-A_70	228.3	331.3	13.7	123.5	23.5	40.3	83.4	28.8	192.6	33494	382.6	239.5	92.1	3263	49814	20095	0
KOS-A_700	247.2	358.9	17.3	133.5	28.8	45.6	85.5	33	185.1	32820	409.1	211	83.7	3160	52310	22414	0
KOS-A_701	234.5	405.9	19.5	116.9	21.2	37.3	70	24.4	184.3	29585	332.3	207.4	67.7	2599	89703	18485	0
KOS-A_702	238.4	370.8	16.1	135.4	25.5	63.4	80.4	28.1	156.4	30504	344.8	126.2	82.9	2728	62814	21439	0
KOS-A_703	265.5	395.5	26.6	155.6	28.5	47.2	88.6	17.7	119.8	38062	264.3	130	80.2	3237	25895	21864	0
KOS-A_704	231.8	349.6	20.2	116.9	22.6	41.1	78.8	23.8	185.6	34409	340.7	218	79.9	3273	56587	19776	0
KOS-A_705	209.6	384.9	14.3	123.3	24.8	45.6	81.6	33.9	190.3	32645	304	154.6	63.1	2449	53189	19394	0
KOS-A_706	240	357.7	16.7	138.2	25.1	38.5	74.8	23.8	216.4	35979	409.1	243.8	70.9	2835	69833	20367	0
KOS-A_707	229	369.7	24.5	149.6	26.1	45.6	91.5	26.4	149.4	35010	279.8	170.2	86.8	3415	55373	26889	0
KOS-A_708	220.3	323.1	14.4	151.6	26.5	39.6	79.8	43.8	186.2	31393	369.3	252.9	90.7	3273	72359	27511	0
KOS-A_709	232.2	370.1	14.3	113.6	24.9	50.9	85.3	31.6	163.8	31232	431.3	207.3	74.5	3472	78707	22733	0
KOS-A_71	253.8	389.9	15.5	138.9	25.7	51.8	83.6	40.4	136	32964	451.2	205.4	74.6	3360	62426	22389	0
KOS-A_710	223	338.1	18.5	137.7	25.2	50.7	86.7	29.1	200.8	35229	526	191.4	71.8	3220	59078	22928	0
KOS-A_711	250.4	338.6	23.9	149.6	26.8	44.2	87.8	24.5	167.9	33853	357.3	185.1	65.9	2983	37283	21189	0
KOS-A_712	230.7	392.2	14.8	159.2	24.2	50	94.4	50.4	209	39411	429.6	317.5	109.4	4006	54715	27916	0
KOS-A_713	263.1	395.2	17.3	140.1	24.4	45.8	76.4	21.3	199.8	35145	316.6	228.3	90.6	3419	47024	22051	0
KOS-A_714	261.8	373.7	11	127.2	24.7	48.5	82.7	35.1	182.7	34999	296.4	219.3	73.5	3240	45715	18703	0
KOS-A_715	226.1	357.7	17.8	122.3	26.5	49.2	80.2	41.6	180	29395	395.1	196.2	81.6	2948	72252	21870	0
KOS-A_716	255.3	363.9	15.5	147.5	25.8	54.6	88.5	41.7	188.8	34810	378.3	257.7	107.4	3620	60138	25916	0
KOS-A_717	225	371.1	6.8	77.5	21	34.3	69.2	31	212.7	27922	516.6	292.6	70	2950	111834	16579	0
KOS-A_718	231.7	377.2	16	114.9	20.5	42.1	76.9	28.1	182.1	31923	392	308.8	90.4	3509	79287	23913	0
KOS-A_719	216.2	425.4	16.3	102.3	22.1	27.4	71.2	31.8	192.6	33374	377.4	224.4	72.9	2604	73493	16832	0
KOS-A_72	247.8	390.3	17.5	125.5	26.4	44.9	86.1	25.2	180.6	34346	378.9	183.2	74.7	2987	61806	19033	0
KOS-A_720	247.7	327	17	142	28.5	32.1	89.9	30.8	193.7	36652	405.6	249.4	99.9	3433	52549	24091	0
KOS-A_721	222.8	370	16.3	106.3	24.7	34.5	81.8	32.6	187.2	31844	330.6	242.6	89.2	3389	53272	19905	0
KOS-A_722	234.5	346.4	13.7	142.3	25.9	49.7	82.2	34	173.9	34653	343.5	205.1	98.7	3502	36323	23950	0
KOS-A_723	255	385.3	17.5	137.3	26.6	40.4	81.8	37.3	198.2	33689	329.2	253.1	78.9	2827	56376	20927	0
KOS-A_724	211.4	301.9	15.8	137.3	25.9	43.2	79.9	28.5	152	30729	359.7	124.6	77.4	2547	46092	20502	0
KOS-A_725	243.2	363.2	16.9	141.3	25.1	38.5	84.9	24.5	203.8	36405	328.7	249.9	86.4	3384	45062	23643	0
KOS-A_726	264.7	405.8	17.5	158.9	28.5	50.7	95.6	37.3	203.3	38864	374.2	233.4	94.3	3416	52013	24365	0
KOS-A_727	205.4	336.5	18.3	127.5	26.4	54.6	82.7	26.3	164.3	33559	265.6	163.8	79.9	2993	53531	22383	0
KOS-A_728	249.3	381.3	19.7	140.9	28.5	30.2	81.9	26.2	185.6	36038	355.2	233.7	75.4	3337	50804	22799	0
KOS-A_729	225.2	380.9	20.4	100.5	21.2	31.5	70.4	15.5	161.5	31032	302.6	165.7	62.7	2366	78545	16329	0
KOS-A_73	236.4	356.3	18	155.7	23.5	52.7	87.2	33.7	175.3	36142	425.5	264.5	105.6	4024	54738	26966	0
KOS-A_730	229.3	377.4	15.4	120.5	22.7	33.7	69.3	26.8	163.2	30982	311.9	256	87.3	3166	55675	20148	0
KOS-A_731	224	371.4	11.4	113.2	22.4	39.6	75.5	21	217.6	32381	327.4	208.1	69	2765	50383	16514	0
KOS-A_732	216.1	393.8	10.1	113.1	21.5	39.4	72.3	32.1	178.8	33000	377.4	249.4	95.9	3129	76756	21228	0
KOS-A_733	208.4	344.7	17.4	129.7	21.4	50.4	77.4	38.3	205.7	33874	324.6	287.2	104.4	3915	68992	29136	0
KOS-A_734	218.8	331.9	16.5	126.3	26.5	47	76.6	21.1	148	27941	261.3	190.8	94.9	3263	37817	22478	0
KOS-A_735	253.6	434.1	19.6	125.4	25.6	27.3	75.2	23.1	224.8	36062	333.5	214	65.4	2494	73919	18400	0
KOS-A_736	232	401.9	13.2	117.4	23	44.2	83.4	26.7	181.9	31426	374	230.8	69.7	2840	79424	19948	0
KOS-A_737	239.3	357.5	13.6	126.8	27.4	44.4	88.3	31.5	204.3	34491	412.2	227.3	99.5	2937	75696	20567	0
KOS-A_738	199.9	364.3	11.8	130.9	23.3	30.3	80.4	46.5	237.8	33746	442.2	283	75.1	2817	74311	23697	0
KOS-A_739	244	357.8	14.2	126.4	27.5	27.4	77.3	28.5	176.2	34993	301.1	234.1	68	2454	67605	17386	0
KOS-A_74	230.2	342.4	20	124.3	27.1	33.7	79.1	31.5	217.2	29987	451.5	177.2	86.8	2467	89104	19883	0
KOS-A_740	240	381.9	18.4	132.3	23.4	47.6	75.6	21	195.3	36103	326.5	220.2	82.4	3240	51926	21296	0
KOS-A_741	247.9	327	19.2	168.3	26.9	55.2	85.5	34.1	172.6	32728	388.9	208.7	96.7	3337	47217	25180	0
KOS-A_742	235.4	351	11.9	112.2	24.7	53.5	76.5	20.2	185.8	32827	346.2	218.1	87.6	3172	66084	20159	0
KOS-A_743	226.7	419.9	10.9	109.5	21.2	44.7	77.1	40.2	190.9	31329	411.3	277.5	71.5	3115	93429	21036	0
KOS-A_744	231.5	345.6	18.1	148.7	29.6	46.8	94.2	28.8	180.8	36215	395.2	183.6	86.9	3408	55300	24976	0
KOS-A_745	228.6	367	15.1	118.6	26.2	46.9	84.4	46.8	216.8	34907	432	260.6	91	3015	69967	20686	0
KOS-A_746	215.3	301.6	9.5	105.2	21.8	38.5	74	23.3	213.4	31478	420	218.7	85.2	3115	71329	21017	0
KOS-A_747	238	377	22	131.7	24.2	30.5	93.1	39.5	234.1	37613	400.8	285	97.8	3429	72734	24183	0
KOS-A_748	228.9	319	16.2	122.6	25.9	39	85.7	39.2	186.9	32170	332.4	190.1	77.3	2704	38566	17828	0
KOS-A_749	250.7	366.4	22.4	132.1	23.3	39.6	88.5	40.9	207.5	33466	483.8	265.7	85.2	3121	79734	22560	0
KOS-A_75	249.1	385.6	16.5	128.5	23.1	40.4	75	26.3	194.6	34479	269.9	259.2	90.4	3537	66223	24368	0
KOS-A_750	211.3	391.8	9.1	72.4	21.6	28.3	74.2	35.5	242.6	28084	437.7	284.6	101	3106	94069	18132	0
KOS-A_751	230.2	377	14.4	107.4	22.3	47.9	80.3	16.6	243.9	34919	415	243.5	79.1	3110	64589	19335	0
KOS-A_752	242.8	335.7	17.6	145	26.9	45.3	93.1	32.1	159.4	36064	264.6	235.8	85.8	3232	39899	22409	0
KOS-A_753	224.1	322	16.4	135.8	27	41.2	85.8	49.5	210.6	34540	444.8	255.6	92.9	3288	58633	22397	0
KOS-A_754	218.5	372.5	14.2	134.4	23.6	45.3	74.2	33.3	194.6	31947	406.2	203.9	79.8	2981	85586	24174	0
KOS-A_755	227.3	314.9	18.4	137.4	25.2	38.7	78.7	16.1	198	33059	568.2	180.5	65	2645	72312	20304	0
KOS-A_756	224.1	427	20.3	117.8	22.9	31.5	76.2	35.1	249.2	33346	544.2	234.6	65.4	2361	95230	19321	0
KOS-A_757	246.9	354.2	19.7	125.6	21.1	50.7	84.5	35.9	198.2	32487	445.1	225.9	81.1	3044	82074	21425	0
KOS-A_758	222.3	420	15.8	137.9	23.9	38.5	76.8	37	238.4	34407	539.5	248.3	84.2	2903	96603	22362	0
KOS-A_759	225.7	362.6	11.1	124.8	24.2	39.3	77	48.5	216.3	33495	446.8	333.6	93.4	3494	81685	25765	0
KOS-A_76	208	314.3	17.3	107.6	26.8	36.1	98.8	39.5	208.8	34563	405.6	274.3	102.3	3270	71145	21913	0
KOS-A_760	241.5	336.5	18.9	161.3	26.7	59.4	88.3	35.7	191.4	37683	539.8	193.4	100.2	3395	71948	24840	0
KOS-A_761	255.1	394.4	19	132.9	23.7	32.7	72.1	27.1	147.4	33224	264.7	242.8	88.1	3211	67085	22884	0
KOS-A_762	257.7	441.3	21.6	126.2	22.5	48.2	82.7	28.6	150.8	34341	270.5	245.3	76.1	3216	82467	23847	0
KOS-A_763	255.9	390.9	14.4	104.5	24.6	46.6	81.2	33.7	199.4	32343	411.1	233.4	79.7	2765	74330	15469	0
KOS-A_764	259.4	395.8	19	143.1	27.7	41.7	89.8	29.9	219.7	37199	536.4	223.5	64.7	2965	64023	19426	0
KOS-A_765	268.8	422.8	20.7	145.8	29.7	46.7	91.5	37.6	209.8	38765	332.7	261.3	79	3449	65552	23924	0
KOS-A_766	208.9	426.3	16.6	114.6	22.2	39.3	74.1	24.3	247.1	34586	424.9	228.3	68.1	2909	95067	23267	0
KOS-A_767	221.1	362.8	13.8	96.5	22	24.7	69.8	20.8	234.3	32039	447.2	211.3	44.9	2015	67860	11364	0
KOS-A_768	219.3	302.9	16.9	123.6	27.4	52.8	85.2	28.4	162.5	29811	283	158.3	75.4	2530	61054	19461	0
KOS-A_769	195.7	327.7	14.4	138.8	26.3	31.4	85.2	32.6	196.3	33468	452.9	198.7	86.9	2884	53435	23064	0
KOS-A_77	222.7	370.7	15.3	112.4	24.3	37.2	81.6	39.1	170.4	30804	246.2	261	86.2	2837	62192	18532	0
KOS-A_770	245.4	409.3	11.7	112.3	21	38.3	77.5	27.8	195.6	34169	382.4	293.6	93.3	3291	69588	19753	0
KOS-A_771	246	333.3	22.5	152.6	27.7	45.2	89.8	37.3	184.2	32316	438.2	187.6	86.8	3123	77036	24809	0
KOS-A_772	239.6	383.7	16.3	149.3	24.5	45.8	85.6	41	196.5	34961	483.9	296.4	94.6	3490	72251	26262	0
KOS-A_773	226.2	347.8	16.9	125.1	24.1	42.2	79.5	24	174.5	33407	368.6	241.9	89	3426	61241	22370	0
KOS-A_774	230.2	389.5	14.9	134.4	24	60.4	78.8	32.5	182.5	32149	361.7	224.5	97.2	3443	79136	26918	0
KOS-A_775	218.4	368.8	15.1	111.3	21.4	43.1	65.2	11.8	215.6	29906	290.8	182.3	70.9	2325	65512	17815	0
KOS-A_776	218	371.7	16.6	129.5	25.5	37.8	79	27.7	207.9	34709	397.2	232	60.6	2660	57442	20249	0
KOS-A_777	277.5	411.3	21.4	156.6	28.6	47.9	85.7	18.5	173.7	33921	329.1	207.8	89	3048	81923	25444	0
KOS-A_778	239	321.6	20.6	152	27.3	38.5	86.9	26.8	148.2	35568	313.4	197.9	91.3	3207	51849	25347	0
KOS-A_779	254.6	321.4	20.6	163.4	27.3	37.2	88.7	34.5	173.2	36393	390.7	220.6	101.4	3293	53560	25521	0
KOS-A_78	225.4	416.7	14.1	129.2	24.8	38.7	80.2	31.7	174.3	34435	348.8	246.2	75.3	2864	87386	22963	0
KOS-A_780	231.3	315.2	19.2	145	24.6	37.4	72.9	26.7	199.7	33153	415.2	214.7	88.3	3279	42929	24668	0
KOS-A_781	253.8	387.1	19.6	154	23.4	53.4	84.8	36.8	191	38748	376.2	270.5	96.8	4016	50290	26355	0
KOS-A_782	241.3	357.3	17.5	138.6	26.1	42.5	91.4	38.7	219	35512	429.3	241.1	94.3	3101	59778	23567	0
KOS-A_783	243.6	382.3	20.3	141.3	26.5	46.8	88.3	29.9	223.8	35648	429.1	213.9	77.4	2917	74703	21918	0
KOS-A_784	243.4	389.9	20.6	127.6	24.6	44.5	82.7	34.9	175.9	33197	211.5	238	104.5	3305	78259	23775	0
KOS-A_785	214.2	322.1	14.8	132.2	24.4	42.2	73.9	26.8	173.8	32821	336.4	208.2	73.3	2806	76125	22248	0
KOS-A_786	213.1	374.1	12.8	88.7	20.4	46.3	67.6	27.5	147.7	29393	295.7	217.4	68	2772	66627	16546	0
KOS-A_787	237.3	328.3	20.2	143.9	27.2	40	93.6	39.9	205.3	37438	336.6	242.8	90.9	3711	54932	27383	0
KOS-A_788	253.5	360.4	24.8	150.7	25.7	37.7	94.2	20.6	183.9	38070	295.1	213.7	105.8	3519	44724	23604	0
KOS-A_789	246.7	401.5	17.2	146.6	24.4	51.2	82.1	28.8	178.9	32547	321	223.3	76.9	2958	63854	24073	0
KOS-A_79	232.8	352.9	18.1	109.8	25	38.9	82.7	32	182.8	33809	369.6	253.6	75.3	3068	89788	19051	0
KOS-A_790	226.9	363.7	12.8	114.3	22.8	38	81.8	44.5	201.7	32786	347	274	70.8	2886	66509	18722	0
KOS-A_791	232.2	381.6	12.2	128.1	24.5	44.3	81.4	37.1	222.1	34080	301.7	271.8	98.6	3295	70971	22141	0
KOS-A_792	254.2	355.6	22.6	162.4	26.1	57.9	87.1	26	139.6	36199	224.5	202.8	83.6	3700	40638	26331	0
KOS-A_793	234.5	375.8	18.1	118.9	27.4	23.7	87.5	30.3	234	38422	359	283.3	66.7	2944	54643	18707	0
KOS-A_794	266.5	342.4	24.7	175.9	28.2	58.2	96.9	28.6	160.3	38799	310.9	228.8	114.3	4315	42937	30562	0
KOS-A_795	245.7	388.8	18.7	131.9	26.5	46.1	86	32.9	141.4	31704	289.5	174.2	68.9	2875	51650	19019	0
KOS-A_796	255.3	388.9	20.5	155.3	24.8	35.1	82.8	36.6	214.7	34626	395.8	268.2	85.8	2953	75048	24848	0
KOS-A_797	229.6	369.6	13.9	161.4	23.1	42.3	83.4	23.3	184.1	35620	358.8	244.7	94.8	3385	60855	28291	0
KOS-A_798	225.3	385.6	17.8	109.3	25.4	32.3	79.1	28.1	200	32024	279.9	147.6	61.6	2257	50762	15077	0
KOS-A_799	255	410.3	20.2	125.7	22.5	32.5	74.2	14.4	127.4	33482	271.5	212.6	78.1	2921	63663	18208	0
KOS-A_8	218	355.5	11.7	101.4	20.6	30.5	73	37	203.7	29060	436.5	244.9	70.9	2817	91693	18536	0
KOS-A_80	212.4	339.5	18.4	126.1	21.3	28.9	72	30	219.6	29472	413.6	252.1	69.3	2980	68897	22653	0
KOS-A_800	251.5	353.4	17.4	125.1	26.7	56.2	76	31.6	184.9	32785	430.7	194.6	71.9	2762	58186	19122	0
KOS-A_801	237.8	403.7	15.2	127.5	23.5	40.3	77.7	41.3	176.7	33585	261.6	261.3	86.4	3352	56186	21800	0
KOS-A_802	224.1	358.4	10.6	91.9	19.8	33.9	68.8	22.9	234.3	30629	404.9	255.4	69.2	2637	71457	15151	0
KOS-A_803	242.7	307.4	13	137.8	25.7	49.9	76.9	37.4	165.8	31875	328.4	217.2	90.4	3874	34351	23778	0
KOS-A_804	255.7	381.1	21.3	147.2	26.2	50.5	84.3	25.9	181.8	36209	310.9	206	73	3033	54490	22336	0
KOS-A_805	205.8	387.6	8.5	98.6	20.9	30.1	61.8	35.4	201.3	28798	415.1	226.8	75.3	2523	74602	16143	0
KOS-A_806	213.6	350.4	9.6	114.5	24.8	32.4	82.2	39.3	213.3	31860	314.9	282.2	84.6	3131	63361	20165	0
KOS-A_807	254.7	382.5	18.3	112.5	22.6	48.4	81.2	22.3	191.7	31269	438.2	252.4	62.7	2873	73435	18586	0
KOS-A_808	206.3	314.6	13.5	114	24.3	36.7	66.9	36.3	177.5	29555	483	229	70.2	2805	70498	20125	0
KOS-A_809	250.7	388.5	21.6	122.1	24.3	45.8	79.1	20.4	192.6	34175	351.8	218.8	79.1	3105	69548	20326	0
KOS-A_81	219.1	345.5	17.2	133.8	26.8	40.2	98	36.8	198.8	38676	480.9	232.1	97.5	3478	65853	24647	0
KOS-A_810	230.1	364.3	17.9	128.9	24.3	49.6	83.7	28	173.9	33299	244.1	225.6	87.3	3509	55261	25099	0
KOS-A_811	255.6	419.2	19.9	161.8	23.2	50.5	81.4	31.9	148.8	35768	120	222.4	92.1	3521	60901	27802	0
KOS-A_812	254.6	410.9	19.1	127.1	22.4	41.9	74.3	17.5	161.8	32705	232.7	202.1	84.9	3304	64909	21367	0
KOS-A_813	261	374.2	16.7	125.8	24.7	56.2	84.4	19.5	185	33686	270	236.7	83.6	3387	61975	20615	0
KOS-A_814	240.6	338.2	17.8	132	24	35.1	76.3	26.6	168.7	31425	269.5	195.8	76.8	2991	50114	20547	0
KOS-A_815	224.2	321.2	10.2	130.9	26.3	36.2	90.6	42.8	212.2	33661	484	246.2	71.5	3038	58944	22458	0
KOS-A_816	252.5	405.7	18.1	123.4	24.8	40	87.7	27.4	196.6	34645	301.9	227.1	81.5	2936	72195	19105	0
KOS-A_817	260.3	377.1	21.5	137.1	23.6	47.5	83.6	27.1	185.6	33403	337.3	215.2	87.9	3046	65388	20663	0
KOS-A_818	232.9	379.5	18.2	127.8	23.3	47.3	85.5	33.1	140.8	32014	279.7	249.4	93.4	3464	81978	25828	0
KOS-A_819	238.3	419	15.4	123.2	23.6	41.5	76.7	30.1	158.3	30371	321.5	229.7	105.6	3257	77573	22456	0
KOS-A_82	200.5	343.5	18.7	152.2	21.9	43.1	75.2	37.1	190.1	32787	607.6	197.6	78.5	2760	59766	23753	0
KOS-A_820	269.5	438.1	18.6	120.8	24.9	39	77.1	25.4	154.8	31805	333.2	204.7	64	2967	85255	18037	0
KOS-A_821	226.7	334.1	16.7	151.4	27.7	39.8	77.3	34	192.1	34267	341.5	217.5	90.8	3275	64675	27056	0
KOS-A_822	236.9	434.2	13.4	152	22.8	43.7	78.1	43.8	205.2	34864	513.3	278.6	73.3	3199	65727	24763	0
KOS-A_823	233.5	392.9	15.7	101	21.6	28.1	75.8	30.1	234.1	31907	386.6	271.7	73.6	2854	77647	18036	0
KOS-A_824	249.5	322.9	22.8	158.5	24.4	43.7	77.9	18.2	173.4	35244	405.7	203.8	73.4	3055	59305	24490	0
KOS-A_825	247.9	444.9	17.5	120.6	22.7	32.9	67.8	24.6	204.9	35079	256.4	253.7	66	2668	64992	17032	0
KOS-A_826	224	392.8	19.1	118.6	22.8	33	83.4	37.2	192.4	33366	352.8	288.1	92.6	3074	84455	22594	0
KOS-A_827	243.7	389.6	16.6	146.2	28.8	41	84.8	29.5	200.3	36026	267.4	193.4	98.5	3165	48201	22758	0
KOS-A_828	219.5	333.3	16.1	150.7	27.2	47.9	83.3	26.1	155.5	30805	391.4	186.4	74.7	2917	68042	23318	0
KOS-A_829	225.3	325.3	14.4	143	24.7	31.3	81.5	37.9	203.1	32923	375.3	273.2	77	3018	55332	22068	0
KOS-A_83	230.4	353.7	13.9	124.9	26.7	40.9	89.2	38.7	176.9	32900	341.4	235.4	68.5	2977	55584	19370	0
KOS-A_830	251.2	370.9	15.5	123.4	23.2	53.2	85	38.5	180.2	33848	319.5	244.9	87.5	3266	35212	19865	0
KOS-A_831	221.1	348.9	13.6	132.8	25.6	36	84.4	37.3	209.7	35733	458.3	269.2	82.6	3200	56464	22465	0
KOS-A_832	241.2	384.5	18.7	142.2	26.9	21.1	89.7	33.3	193.3	36482	399.7	283.4	85.9	3006	81025	22772	0
KOS-A_833	227.9	333.8	16.9	112.9	26.6	38.5	78.1	27.6	197.5	30430	400.2	171.4	73.5	2749	83468	17912	0
KOS-A_834	229.2	308.5	16.7	135.7	26.9	38.4	84.2	27.9	183.6	34390	411.2	213	92.4	3332	35950	21967	0
KOS-A_835	226.9	360.1	17.3	150.6	26.2	55.6	92.6	26.7	201.8	36247	506.5	194.6	65.1	3173	58617	25495	0
KOS-A_836	242.8	340.7	14	117.6	25.2	42.9	78.6	31	187.5	30018	256	230.2	100.5	3416	60435	23519	0
KOS-A_837	230.4	327.7	20.5	130.9	28	42.3	96.7	25.3	142.8	33416	252.3	166.9	82.5	3132	64081	23387	0
KOS-A_838	258.5	398.3	26	149.9	24.1	41.4	83.6	19.3	180.4	38309	324.1	265.4	87.4	3419	78292	26891	0
KOS-A_839	258.7	382.2	16.6	128.9	27	49.4	83.3	32.8	203.6	37643	407.7	262	86.4	3502	71390	22162	0
KOS-A_84	256.3	393	22.9	134	24.2	33.4	84.6	30.2	173.3	34397	304.8	237.7	97.8	3387	57066	22255	0
KOS-A_840	236.2	362.9	13.6	116	25.1	39	84.3	36.5	223.7	36001	379.9	281	90.6	3280	80734	22999	0
KOS-A_841	279.2	455.1	20.1	139.8	26.3	43.7	85.9	14.8	182.1	38040	310	231.4	89.1	3363	78382	22555	0
KOS-A_842	229.9	376.9	21.9	145.6	22.2	37	74.5	19.4	160.1	33868	314.4	173.5	66.5	2774	68987	23423	0
KOS-A_843	223.6	321.6	15.3	136.6	27.1	44.7	86.2	35.7	185.6	33462	438.8	209.2	86.3	3053	52744	22277	0
KOS-A_844	235.7	353.3	17.9	148.8	25.6	51.8	77.2	30.7	175.2	32442	462.8	168.5	85.5	3030	61956	22878	0
KOS-A_845	237	411.5	14.8	121.7	21.4	34.5	86.1	29.4	194.1	32127	337.4	256.9	66.5	2743	80949	21897	0
KOS-A_846	260.1	464.1	22.7	143.1	21.4	37.6	78.8	27.1	185.4	34716	288.3	286.7	86.6	3161	88378	24692	0
KOS-A_847	261.3	396.8	15.8	125.7	24.6	41.8	67.8	18.8	160.8	32078	284.6	233.5	78.3	3056	53277	19948	0
KOS-A_848	230.6	346.9	11.9	153.3	26.6	50.9	86	38.5	153.1	32824	372.2	169.3	92.7	2826	52172	23939	0
KOS-A_849	229.4	413.6	14.5	103.9	20.4	42.9	70.8	23.8	202.8	31131	320.5	223	44.5	2639	54016	18057	0
KOS-A_85	260.4	346.2	18	152	26.3	47.9	86.5	31.3	187.9	34380	379.1	227.3	84.4	3101	55167	22757	0
KOS-A_850	227.5	346.5	17.6	130.2	25.5	44	86.5	24.5	166.2	31346	451.1	173.8	73.7	2816	55469	19289	0
KOS-A_851	234.8	402.5	18.8	147.1	27.1	49.1	90.4	24.8	184.4	37346	217.8	181.8	86.3	3200	51420	23937	0
KOS-A_852	214.6	317.8	11.9	135.9	26.1	49.1	81.2	29.8	200.3	31220	447.1	145	69	2377	58157	19712	0
KOS-A_853	222.2	387.6	14.4	121.6	23.1	26.4	77.8	34.7	205.6	34779	322.5	293.2	78.6	2813	71225	20707	0
KOS-A_854	214.9	377.7	17.9	117.6	26.7	31.3	79.9	30.9	222.5	33338	393.5	196.3	74.9	2656	71339	19936	0
KOS-A_855	240.8	365.6	15	108.1	23.3	39.2	76.5	18	211	33764	298.6	235.7	83	2962	51274	17751	0
KOS-A_856	218.4	409.8	14.5	113.1	20.4	29.3	78	25.2	198.8	32856	379.9	262.9	81.6	3197	67381	21723	0
KOS-A_857	232	343.3	16.9	131.2	27.3	50.5	87.4	46.3	190.8	31815	311	236.2	84.4	3031	57667	22777	0
KOS-A_858	245.7	396.8	19.6	156.9	28.8	39.9	91.3	34	208.9	38835	400.8	214.8	86.6	2987	57048	21232	0
KOS-A_859	217	318.5	14.1	123.3	23.7	39.9	77.2	24.3	168.6	31087	324.9	185.5	84	2840	64194	20441	0
KOS-A_86	250	432.9	19.1	133	26.2	35.9	87.7	34.1	219.7	39415	398.1	298.3	89.3	3407	67464	22776	0
KOS-A_860	224.7	373.9	9.6	92.6	22	31.8	79.9	21.3	207.1	31680	270.7	265.5	91.3	3473	67120	19423	0
KOS-A_861	237.3	390.8	17.8	124.6	25.5	43.5	77.3	19.6	198.1	34436	410.6	213	73.1	2790	57911	18467	0
KOS-A_862	266.7	379.5	20.4	124.6	27.3	51.4	96	31.7	204.6	35994	354.7	237.8	97.2	3532	62685	20850	0
KOS-A_863	242.3	345	15.2	148.5	27	43.2	83.4	24.4	191.3	34217	472.8	225.7	78.9	3089	59275	23470	0
KOS-A_864	193.4	296.4	12.9	109	25.6	36.2	84.4	44.6	213.6	32581	343.2	213.8	85.7	2566	62267	17264	0
KOS-A_865	225.5	349.7	16.1	114.7	22.2	38	69.3	15.1	188.2	30426	330.4	218.4	60.5	2592	58958	17603	0
KOS-A_866	206.9	363.6	15.7	108.4	25.5	28.4	86.8	43	228.7	31383	425.5	224.8	65.4	2378	89669	17574	0
KOS-A_867	234	423.5	17.4	121.6	24.4	36.7	82	34	219.5	34260	405.2	276.7	90.3	3263	92368	24536	0
KOS-A_868	238	406.9	15	122.6	22.1	43.7	79	28.4	210.5	36589	470.4	268.6	78.5	3130	68240	20497	0
KOS-A_869	242.3	396.3	16.8	128.8	25.3	34.5	81.8	22.1	217.1	35078	418.5	261.6	76.6	2888	72517	21452	0
KOS-A_87	235.7	325.4	19.5	134.9	26.9	61	94.8	21.7	169.8	30234	373.6	149.6	91.5	3152	79536	24258	0
KOS-A_870	237	375.5	15.2	104.9	21.5	38.4	72.4	27.1	183.8	33085	381.9	268	69.9	3364	59835	19119	0
KOS-A_871	228.8	354.6	12.1	121.8	22.2	28.7	74.1	20.2	174.6	29523	323.8	227.3	69.9	2827	69797	18538	0
KOS-A_872	239.1	410.6	18.3	143.9	28.3	41.1	78.4	30.7	181.8	33827	406.2	162.9	74.1	2688	73297	23060	0
KOS-A_873	245.6	377.2	21.8	136.1	25.7	34.6	95.6	27.9	162.4	37502	307	213.6	84.4	3207	53063	23170	0
KOS-A_874	225.8	355.6	20.5	153.6	26.2	34.3	86.2	38	191.9	33992	487.7	241.6	90.2	2927	65365	22376	0
KOS-A_875	215.1	384.8	17	123.8	24.2	24.8	81.4	34.7	172.5	33272	307.2	227.5	100.9	3216	87471	24252	0
KOS-A_876	251.9	313	23	136.3	22	46.8	87.4	20.6	180	34659	408.1	269.8	103.7	3916	33410	22110	0
KOS-A_877	228.1	332.5	12.6	145.6	27	41.4	89.7	40.2	197.3	35657	403.8	258.1	99.2	3445	38068	23927	0
KOS-A_878	233.2	394.7	13.8	128.6	23	40.6	81.8	42.9	217	37729	342.4	318.5	108.9	3706	77146	26624	0
KOS-A_879	246.4	370.5	14.8	154	25.3	44.7	88	46.4	206.7	35603	561.3	262.3	79.9	3141	59762	23228	0
KOS-A_88	247.4	384.2	18.5	95.6	21.1	43.4	74.4	31.9	213.5	34304	283.3	267.1	84.3	3318	59393	17497	0
KOS-A_880	248.7	352	18.4	143	28.1	42.4	91.4	40.8	193	36288	327.3	239.3	89	3465	57447	25229	0
KOS-A_881	199.4	322.2	14.4	112	21.6	46.1	78.4	23.1	205.1	30723	253.7	197.6	67.4	2648	60718	19307	0
KOS-A_882	224	352.3	15.8	138.1	28	34.7	86.7	30.4	194.3	37511	305	219	95.5	3317	46809	23004	0
KOS-A_883	261.8	424.1	18.5	134.2	23.6	40.8	78.3	33.6	199.6	34469	343.3	271.9	70.5	3345	83320	23824	0
KOS-A_884	233.7	350.7	22.4	149.5	24.6	37.6	84.8	32.2	204.6	36007	495.1	245.9	77.3	3200	51393	23904	0
KOS-A_885	218.9	392.1	7.3	104.8	20.4	35.4	71.4	31.6	223	32256	442.8	297.2	70	2799	82331	18058	0
KOS-A_886	219.2	377	14	123.6	24.8	30.7	67.9	34	174.8	30061	395	183.9	61.5	2136	85435	19050	0
KOS-A_887	222.5	372.5	18.5	127.6	22.9	38.7	82.4	30.9	217.3	35436	430.6	235.8	79.6	2930	66664	20985	0
KOS-A_888	267.8	413.4	16.2	144.9	28.3	43.5	92.4	37.1	199.7	37468	377.3	272.1	97.3	3526	40912	22740	0
KOS-A_889	240.1	340.8	20	139.7	26.6	50.9	85.6	26.3	192.2	31895	485.7	205.7	76.2	3152	58686	21935	0
KOS-A_89	232.6	329.8	14	136.3	22.6	53.6	80.9	43	189.9	35843	295.8	281.1	123.6	4138	45450	27990	0
KOS-A_890	250.4	350.8	24.2	129.8	26	40.5	88.7	24	172.8	34837	414.2	188.4	88.9	3056	63187	19467	0
KOS-A_891	237.6	381.4	14	96.6	24.4	29.2	84.5	33.8	208	33408	413.6	265.2	68.2	2975	70530	15927	0
KOS-A_892	237.7	335.9	13.6	99	24.1	48.2	85.7	37.2	190	32001	381.2	279.2	80.9	3295	67798	18356	0
KOS-A_893	236.8	373.2	14.4	114.2	22.5	34.3	81.4	34.6	225.5	31547	416.8	316	78.2	2772	92009	18998	0
KOS-A_894	255.3	376.4	14.5	134.3	29	44.5	86.9	35.2	176.4	34570	420.5	233.9	80.3	2933	64210	18794	0
KOS-A_895	231.8	373.5	18.7	113.4	24.7	50.2	80.2	25.3	165.7	32743	311.9	178.8	80	3392	56427	20647	0
KOS-A_896	248.3	390.1	22.7	151.6	28.8	41.1	92.7	29.4	199.2	37750	440.6	179.8	89.1	2921	52571	20282	0
KOS-A_897	203.3	298.4	13.6	106.6	23.9	29.9	71.9	25.5	166.4	29004	275.3	188.3	76.8	2536	58867	17629	0
KOS-A_898	257.9	367.8	18.6	139.8	27.4	52.2	91	21.8	175.7	35891	343.3	224.8	93.2	3315	49097	22737	0
KOS-A_899	243.5	361.2	21.6	129.1	25.8	49.1	87.7	32.4	165	32345	288	141.2	69.2	2557	52791	19223	0
KOS-A_9	249	390.3	21.3	135.6	27.5	38.8	91.2	27.4	163.3	34710	339	238.7	90.4	3107	75172	22171	0
KOS-A_90	252.1	386.9	17.8	147.4	25.2	43.1	90.5	37.3	215.8	37672	397.3	287.5	102.8	3448	76796	25418	0
KOS-A_900	231.8	372.2	20	121.9	22.6	43.3	80.2	24.7	159.4	33368	215.8	199.8	77.4	3110	56536	22207	0
KOS-A_901	253.4	390.1	16.9	129.6	22.6	37.3	76.5	24	223.9	33527	377.7	238.8	72.3	2926	72677	20414	0
KOS-A_902	212.9	363.9	15.5	133.7	25.8	44.6	86.8	33.1	207.3	35751	486.8	174.1	92.5	3333	62308	24257	0
KOS-A_903	243.1	354.1	15	158.3	27.3	39.8	92.5	31.9	264	37863	577.3	272.2	70.4	3172	58257	23929	0
KOS-A_904	241.1	423.2	22.6	140	22.9	36	76.7	30.9	176.3	35164	413.2	257.3	90.2	3324	82869	24357	0
KOS-A_905	222.3	341.4	16.2	88.1	22.4	50.6	84.1	30.6	181.9	29400	390.2	284.6	76.1	2841	79610	17168	0
KOS-A_906	256.6	380.7	18.4	150	26.8	46	87.1	38.2	208.5	39109	446.8	245.5	83.6	3387	33869	22775	0
KOS-A_907	225.7	355.3	15.4	153.6	25.7	39.3	81.7	37.3	219.7	33294	446.4	200.9	101.1	2811	53724	23159	0
KOS-A_908	252.8	376.4	23.7	156.2	25	44.7	81	28	190.2	34259	444.3	181.1	83.3	3240	60753	25432	0
KOS-A_909	234.9	391.6	14	121.8	21	38.9	72.8	29.9	179.3	30809	319.8	251.7	88	3023	73886	21611	0
KOS-A_91	254.4	406.8	18.8	164.2	27.8	51.2	90.2	39	179.9	34660	380.4	236.1	103.3	3923	64426	29002	0
KOS-A_910	230.1	355.1	11.2	130.1	26.5	50.8	82.5	22.2	176.6	30857	313.7	194.2	75.4	2930	70533	22909	0
KOS-A_911	231.6	411.5	8.4	127.8	23.1	47.4	75	33.5	188.1	33668	395.3	285	80.9	3325	69266	21968	0
KOS-A_912	208.2	334.9	10.3	133.4	24.1	45.1	72.9	27.1	155.1	32565	376.2	186.6	84.1	3378	56307	23220	0
KOS-A_913	243.8	373.2	12.9	99.6	23.6	50.3	77.5	30.3	170.9	29897	211.9	193.8	82.4	2835	57706	16952	0
KOS-A_914	252.8	358.9	21.7	170.5	29.1	42.6	92.5	44.9	181.7	35687	410	223.6	87.9	3470	54329	26605	0
KOS-A_915	238.3	392.6	20.2	184.4	23.9	47.6	78.6	27.5	154.5	35649	323	216.9	104.1	3623	52371	30776	0
KOS-A_916	234.1	400.8	14.9	119.8	23.6	36.7	82	34.1	208.9	35877	369.2	252.8	76.8	2960	64754	18676	0
KOS-A_917	225.2	357.7	13.4	144.1	25.4	42.2	83.6	38.8	178.8	35774	304.8	280.3	113.3	3617	81657	28422	0
KOS-A_918	213.4	374.8	15.8	117.6	21.1	27.9	76.1	30.3	172.1	31327	409.5	223.5	75	2871	74725	20861	0
KOS-A_919	250.9	409.7	16.1	126	27.3	44.3	81.7	33.5	214.5	33953	407.4	170.2	47.8	2447	69526	16057	0
KOS-A_92	207.7	377.8	12.3	101.4	18.7	29.4	72.4	42.1	198.9	30890	334.2	308.9	83.8	3166	76100	21314	0
KOS-A_920	248	355.8	23.8	152.1	27.1	43.7	92.1	25.3	186.1	34736	433.6	212.7	81.1	3041	60008	21604	0
KOS-A_921	244.5	359	19.4	147.6	27	53.9	86.3	33.4	177.2	32494	305.5	176.1	95.5	3675	55133	26736	0
KOS-A_922	224.9	399.1	20	118.4	25.1	27.9	82.5	31.3	185.9	35542	270.4	159.4	81.1	2808	48352	17637	0
KOS-A_923	235.6	323.5	13.8	130.4	28.5	56.1	91.8	38.2	192.8	34259	430.5	221	76.6	3081	69997	22264	0
KOS-A_924	228.4	343.6	24.6	147.6	25	41.2	84.1	34	155.3	37325	287.1	203.9	98.1	3843	54854	27505	0
KOS-A_925	223.5	385.8	12.8	121.5	20.7	44.1	69.7	24.9	165.6	33629	300.8	221.3	83.6	3388	68938	23384	0
KOS-A_926	209.2	378	14.8	112.1	21.7	40.1	68.7	33.5	196.4	28901	361.4	223.9	69.1	2816	70939	19265	0
KOS-A_927	255.3	430.2	24.1	139.8	26.5	42	84.7	19.4	166.2	34418	307.7	197.4	70.7	3054	48850	20459	0
KOS-A_928	217.6	352.5	15.8	111.6	24.4	31.4	75.7	37.6	223.2	31251	443	234.7	67.2	2796	67986	18244	0
KOS-A_929	245.3	408.7	15.8	120.5	22.3	40	79.2	16.1	150.5	31026	295	163	60.7	2419	77146	18240	0
KOS-A_93	212.7	394.6	13.6	112.3	21.9	43.9	71.6	28.2	188.9	32561	322.7	234.7	75	2992	80800	22162	0
KOS-A_930	219.9	358.6	14.6	124.9	26.2	35.3	76.6	27.9	176.8	32987	367.4	222.2	84.2	3209	69052	21350	0
KOS-A_931	224.1	364.7	19.7	129.4	22	27.8	87.1	36.7	200.2	32269	442.2	243.8	72.2	2772	69974	20477	0
KOS-A_932	228.9	370.5	16.8	116.4	24.4	43.3	81.9	27.8	213.8	35099	316	237.9	76.3	3122	61221	20111	0
KOS-A_933	234.6	317.7	16.2	152.2	25.7	40.2	92.5	32.9	188.7	33129	449.1	254.8	84.6	3562	62134	26143	0
KOS-A_934	228.5	377.1	15.9	135.3	26.2	42.1	71.7	25.2	198.2	37918	399.8	226.3	77	3271	61328	23267	0
KOS-A_935	238.4	359.5	21.8	132.2	24.2	51.3	86	32.7	176.3	36423	288	180.7	97	3099	44555	20944	0
KOS-A_936	257.4	337.4	9.3	127	27.3	56	78	25.9	185.1	34087	372.3	247.9	78.5	3331	48205	18529	0
KOS-A_937	229.7	366.1	18.2	131	25.2	42.5	85	30.7	222.7	34417	421.8	206.2	95.8	3075	76466	22551	0
KOS-A_938	265.4	392.6	19.4	121.8	22.1	54.5	74.1	24.5	163	31860	286.5	251	95.1	3221	87747	21474	0
KOS-A_939	244.2	351.4	14.1	151.6	26.9	51.6	82.4	38.9	207.8	36130	479.7	230.4	93.6	3298	54733	23796	0
KOS-A_94	247.3	394	14.9	132.8	26.3	41.7	77.7	38.8	211.8	36052	246.8	228.1	78.8	3127	47290	21778	0
KOS-A_940	242.5	349.5	17.5	125.7	25.6	55.8	79.3	30.1	178	33337	340.1	187.5	75.8	3104	54185	20516	0
KOS-A_941	215.8	330.1	17.3	116.7	22.8	31.4	72.2	25.9	145.5	30414	210.8	173.8	63.8	2753	39933	17668	0
KOS-A_942	234	378.2	15.3	103.9	23.1	43.6	79.2	35.2	201.7	31979	293.2	234.8	88.4	3288	51440	19636	0
KOS-A_943	257.6	427.4	18.8	162.4	24.6	41.6	88.3	33.3	184.1	34651	282.1	283.8	93.4	3357	47020	24607	0
KOS-A_944	256.2	409.5	17.1	120.1	21.6	35.9	71.7	31.9	184.7	30013	361.9	270.5	75.7	3167	74603	19427	0
KOS-A_945	225.9	329.2	16.9	139.2	25.8	36.5	78.1	29.6	205.4	30878	437.5	184.2	70.3	2655	88917	23405	0
KOS-A_946	233.2	321.7	16.9	137	28.6	44.1	84.5	28.1	199.3	34429	408.6	200.3	76.9	3169	55207	21062	0
KOS-A_947	237.5	333.8	16.7	136.4	28.8	51.9	87.7	36.1	171.4	32991	494.6	194.8	79.5	3221	58594	22663	0
KOS-A_948	197.6	373.3	11	104.1	21.6	28.1	66.1	35.2	213.9	30912	429.5	271.2	71.4	2838	93727	20895	0
KOS-A_949	236.9	395.8	16.3	126.8	25.7	41.6	72.9	25.9	148.9	34733	325	161.2	58.9	2878	37408	17296	0
KOS-A_95	243.1	431.3	15.4	101.1	22.1	30.9	68.5	22.3	192.3	30569	235.5	254.5	88.1	2999	76784	19247	0
KOS-A_950	232.6	448.2	8.1	105.4	20.8	45.2	66.6	40.4	225.5	31607	268.2	286.6	75.9	2836	79343	18194	0
KOS-A_951	238.3	364.9	16.2	139.2	25.3	42	77.9	22.5	194.3	33345	395.2	215.5	63.5	2549	56167	18583	0
KOS-A_952	266.9	352.9	19.2	161.1	27.5	55.8	87.1	30.8	183.2	36877	304	238.4	115.2	3856	50591	27274	0
KOS-A_953	244.6	375.9	17.3	127.4	24.1	41.3	75.7	31.3	175.2	33397	255.2	263	98.8	3473	64430	21506	0
KOS-A_954	218.5	327	17.6	127.8	23.9	46.1	89.6	38.8	196.1	33897	394.2	271.8	104.3	3459	84054	25836	0
KOS-A_955	230.7	316.8	20.8	162.9	29	48	96	35.8	164	37390	344.2	176.5	92.6	3101	37909	24070	0
KOS-A_956	232.9	388.5	13.8	128.3	24.5	39.2	75.5	36.3	248.1	35426	533.9	298.3	78	3237	79515	22736	0
KOS-A_957	221.5	331.1	14.1	131.7	24.5	35.8	82.9	31	210.5	31745	535.1	247.6	84.6	3075	59365	21632	0
KOS-A_958	247.2	384.3	16.5	133.8	29.3	41.7	82.4	27.2	225.7	34418	507.6	220.1	83.9	3161	57241	21465	0
KOS-A_959	223.2	403.2	16.5	100.8	23	32.9	69.6	22	185.4	33176	154	227.3	72.9	2769	79106	19764	0
KOS-A_96	230.7	349.1	17	103.2	25.8	38.5	78.4	24.6	192	32707	335.6	219.9	78.1	2891	80430	19152	0
KOS-A_960	222.5	407.2	12.5	103.9	20.7	41.1	66.8	22.8	217.1	32002	366.1	185.3	76.2	2624	64452	15937	0
KOS-A_961	245	395.3	16.2	128.3	23.4	40.3	81.8	21.9	203.9	33509	289.2	224	72.9	2633	55456	19556	0
KOS-A_962	228.4	379.1	17.6	137.7	23.5	30.2	87.5	37	185.4	34216	365.3	307.4	99.2	3275	63206	25571	0
KOS-A_963	230.3	387.9	13.7	108.5	22.6	34.6	65.8	12.9	179.8	32278	262.1	215.4	60.7	2782	69436	18169	0
KOS-A_964	235.6	371	14.6	127.3	20.9	41.4	74.5	27.2	182.5	30670	366.2	242.4	90.9	3234	61821	24618	0
KOS-A_965	239.8	426.5	18.8	114.4	22	26.8	77.2	20.1	176.6	30053	317	219.4	67.3	2702	74743	19913	0
KOS-A_966	247.1	342	15	136	28.9	49.9	87.8	34	175.2	31775	455.8	217	77.9	2935	78716	22414	0
KOS-A_967	216	385.2	12.2	89.4	19.6	27.8	70.8	27.4	188.1	28923	402.7	272.6	62.6	2491	92862	15992	0
KOS-A_968	243.4	436.9	10.4	135.4	22.3	45.9	71.9	31.1	199.8	34885	333.9	319.9	94.6	3875	70318	26944	0
KOS-A_969	255.8	370.1	20.1	126.4	24.3	51.7	84.4	32.4	148	31782	357.8	225.9	78.3	3260	55181	20553	0
KOS-A_97	232.8	376.3	20.7	129.9	24.7	38.6	73.6	6.3	203.8	34613	318.6	137.7	76.4	2632	60028	20773	0
KOS-A_970	229.5	317.4	14.7	150	27.1	41.5	91.8	26.3	207	36624	332.2	237.8	85	3403	50514	26014	0
KOS-A_971	227.7	391.3	16.2	131.9	24.3	46.5	68	21.9	213.5	32854	392.9	156.8	56.8	2367	73195	20672	0
KOS-A_972	230.7	389.7	17.1	129.3	21.9	37.8	92.4	34.5	191.6	34394	308.7	308.3	94.3	3499	58580	24847	0
KOS-A_973	246	429.8	20.6	162.8	22.1	39.1	79.9	17.3	192	35750	372.2	185.6	86.1	2977	93240	26646	0
KOS-A_974	241.3	394.2	20.5	132.5	25.9	36.6	82.8	14.1	153.9	34178	227.3	176.1	75.1	2945	57468	21811	0
KOS-A_975	197.7	324.3	16.1	114.3	24	26.5	72.6	27.9	194.4	32740	283.2	208.1	75.8	2276	41683	16697	0
KOS-A_976	238.7	382.3	15.9	135.9	24.3	42.9	83	27.1	151.3	31002	221.4	164.8	96	3007	62310	22523	0
KOS-A_977	219.8	361.5	14.3	124.3	22.3	51.2	76.3	26.7	222.6	33194	353.8	198.1	97.8	3240	70702	24503	0
KOS-A_978	238.9	379.2	21.1	155.8	26.9	51.5	94.4	32.7	200.1	38853	460.9	235.1	97.9	3324	83538	25292	0
KOS-A_979	218.6	301.9	13.4	134.8	26.9	47.1	85.5	34.9	225.8	34048	474.6	221.2	73.7	3031	68284	22818	0
KOS-A_98	266.7	368.1	22.6	147.7	29.9	37	96.2	28.8	205.3	36695	525.1	203.5	71.2	2747	51395	18190	0
KOS-A_980	227.4	361.3	20	149.5	24.3	40.8	88.6	30.5	194.8	35933	321.2	235.8	99.3	3602	65909	27672	0
KOS-A_981	253.4	395.5	18.8	160.5	26.8	37.8	84.2	31.8	171.8	34053	416.5	226.8	73.6	3114	52277	24032	0
KOS-A_982	222	376.3	11	107.3	21.9	42.4	74.8	22.1	190.2	30940	277.1	212.1	83.4	2713	63076	19548	0
KOS-A_983	227.3	379.5	14.8	120.1	23	48.2	86.8	27.2	202.7	33590	363.4	246.4	89.9	3163	65190	22572	0
KOS-A_984	246.4	351.3	18.7	143.6	26.4	46.3	82.5	32.5	170.3	35929	400.6	216.3	87.4	3307	39460	21406	0
KOS-A_985	265.7	382.9	20.3	141.6	25.8	43.5	83.6	28.7	212.1	35156	281.3	258.3	87.7	3483	51838	24155	0
KOS-A_986	215.8	363.6	16.1	103.5	21.2	43.2	84.4	28.8	188.6	30359	341.6	213.9	76.8	2842	69175	19075	0
KOS-A_987	227.5	376.5	15.3	137.6	26.3	41.3	87.6	35.7	214.6	35095	419	222	70.6	2927	67098	22260	0
KOS-A_988	201.1	355.7	11.1	122.6	21.8	40.4	73.1	21.1	140.3	29739	295.8	202.8	64.2	2798	54812	22076	0
KOS-A_989	220.6	415.4	15.9	96.6	23.4	28.8	68.8	22.4	202.6	29991	364	212.7	46.3	2527	82056	18127	0
KOS-A_99	212.2	404.3	19.4	119.6	24	22.1	78	44	207.7	36668	259.2	295.1	91.6	3007	62896	21975	0
KOS-A_990	231.3	359.2	15.2	126.9	21.7	42.2	81	32.9	208.3	32291	369.3	264.4	76.2	3357	53457	22140	0
KOS-A_991	260.8	376.8	15.3	129.4	27.3	52.9	91.3	32.1	211.9	35753	446.1	231.5	82.8	3220	65001	20925	0
KOS-A_992	206	340.7	22.3	119.8	24.2	27.8	70.2	19.7	206	33430	357.8	168.7	69.4	2571	65101	19981	0
KOS-A_993	247.6	452.2	22.2	139.7	25.4	34.4	88.1	35.9	192	38678	271.3	268.8	79	3313	48223	21453	0
KOS-A_994	240.3	359.6	15	128.1	26	41.1	91.2	26.3	199.3	35117	299.6	219.1	90.2	3348	57815	21229	0
KOS-A_995	235	336.3	20.2	119.7	25.1	37.2	82.7	24.4	158.4	30832	266.6	192.1	68.2	2757	54068	17926	0
KOS-A_996	228.8	390.2	20.9	148.7	24.4	45	81.9	31.7	167.8	36645	391.5	216.3	90.7	3400	71864	26913	0
KOS-A_997	224.3	371.7	21.9	120.3	22.4	42.6	86.2	36.6	148.9	34397	220.9	235.6	89.7	3574	62267	25473	0
KOS-A_998	233.5	369.7	16.7	141.5	26.1	44.6	83.7	41.6	160.6	33022	294.6	178.9	90	3332	65004	25418	0
KOS-A_999	248.2	431.1	13.1	111.8	23.9	40.9	75.7	22	191.7	31614	459.5	186.8	64.2	2574	89146	16582	0
KOS-B_1	182.4	258.6	9.5	108.7	21.5	43.4	88.2	33.9	433.4	37897	786.3	361.7	63.9	2463	114876	21256	1
KOS-B_10	193.1	256.8	10.3	109.1	20.9	39.4	82	32	395.3	36967	706.6	349.1	57.1	2107	105310	18804	1
KOS-B_100	189.1	267.7	7.2	104	20	40.9	87.4	25	408.5	36522	738.8	309.7	46.6	2032	108262	18433	1
KOS-B_1000	181.5	248.5	7.4	89.4	18.1	39.7	76.5	31.2	380	34447	611.9	418.7	65.6	2384	88368	18203	1
KOS-B_101	171.3	248	6	103.3	17.6	41.9	80.1	44.9	393.5	35816	687.2	383.1	57.1	2403	103116	19926	1
KOS-B_102	184.8	264.7	9.2	117.3	22.6	34.4	81.8	19.7	395.4	36414	741.6	282.3	51.1	1767	117741	17819	1
KOS-B_103	176	261.5	11.1	87.8	16.2	25.4	73.3	19.6	391.4	33376	619.6	330.8	61.7	2139	99847	15735	1
KOS-B_104	176.2	253.4	8.4	92.6	16	36.2	78.8	34	399.2	34549	674.3	325.4	55.6	2066	89631	16382	1
KOS-B_105	183.3	252.4	8.4	99.7	19.3	36.3	81.1	27.2	393.8	35813	666.2	369.5	53.9	2236	99589	18288	1
KOS-B_106	186.6	260	10.7	99.7	20.3	36.1	71.6	29.4	392.5	35810	728.9	357.8	66	2235	96883	17455	1
KOS-B_107	197.7	272.9	12.1	89.5	15.3	41.8	90.2	33.4	403.6	37630	595.6	390	74.9	2743	98696	20102	1
KOS-B_108	193.8	268.3	12.9	91.5	19.6	34.9	75.7	24.2	374.4	35620	632.7	411.3	78.7	2557	92083	18879	1
KOS-B_109	184.4	263.1	6.9	96.4	17.9	41.5	83.7	24.3	379	36035	675.2	335.5	55.5	2174	92167	17333	1
KOS-B_11	186.3	271.4	9.1	100.2	19.2	39	85.2	30	411.1	36246	741.2	324.7	56.4	2208	104706	18517	1
KOS-B_110	178.7	265.3	12	86.3	17.2	23.4	77.5	14.7	398.9	33384	624.1	336.2	58.2	2196	101179	16339	1
KOS-B_111	179.5	259.2	8.6	99.5	19.5	36.1	79.2	32	412.6	35598	726.9	342.4	58.8	2287	106195	18488	1
KOS-B_112	184.7	249.1	8.7	94.2	16.8	32.1	72.7	40.7	362.4	34725	529.2	453.6	77.3	2551	98366	18909	1
KOS-B_113	178.9	256.9	11.6	91.1	18.5	25.1	75	15.8	399.9	32674	620	327.2	55.3	1957	106874	16078	1
KOS-B_114	180	263.2	7.4	91.5	19.7	30.5	70.6	12.5	356.1	34512	665.1	368.6	55.1	2315	93451	16279	1
KOS-B_115	178.1	254.2	11.6	89.5	12.5	14.5	72.3	24.8	393.4	33515	432.5	319	54.6	2184	111477	15583	1
KOS-B_116	189	270.4	11.4	96.1	17.7	37.3	87.7	35	423.1	37069	683.7	385.1	71.6	2709	115379	20926	1
KOS-B_117	165.3	257.8	10.1	82.4	14.6	21.5	71	31.1	408.5	32365	621.7	362.5	68.3	2475	109430	17097	1
KOS-B_118	209.8	296	12.2	92.4	19	31.8	89.3	17	378.9	37019	579.2	450.1	80.2	2832	124037	21494	1
KOS-B_119	181.9	270.4	9.4	102	20	41.2	84.7	34.2	424	37046	810.5	375.9	77.2	2554	120426	20708	1
KOS-B_12	193.5	256.4	11.8	96.2	19.2	34.8	76.7	25	371.5	36218	604.9	397.9	59.6	2417	89480	18046	1
KOS-B_120	188.9	255.9	8.7	103.6	18.9	37	78.6	37.5	410.5	35929	657.9	360.8	60.8	2177	113287	18641	1
KOS-B_121	172.1	241.2	7.3	104.9	19.9	42.6	72.9	42.1	398.2	35049	744.8	332.7	57.8	1976	88087	17291	1
KOS-B_122	190.1	249.5	8.5	104.8	18.8	36.4	78.1	23.6	364.7	36645	581	353.4	50.9	2062	92576	16877	1
KOS-B_123	183.5	253.5	10.1	90.2	17.2	29.7	72.2	26.9	373.4	34145	574.7	373.8	57.2	2223	85201	16416	1
KOS-B_124	163.3	268.5	7.6	78.6	13.3	27.9	72.1	17.6	381.4	31817	593.8	317.6	69.6	2218	102618	15507	1
KOS-B_125	184.1	249.5	9	106.6	22.2	44.1	79.2	30.4	401.3	35989	759.6	345	60.1	2044	99578	18396	1
KOS-B_126	185.3	258.6	5.8	101.2	18.7	38.4	78.1	27.3	389.8	35529	704.9	321.1	47.4	1879	98789	16408	1
KOS-B_127	180.8	247.6	6.5	100.1	19.8	44.4	75.9	38.9	376.4	36128	694.8	418.3	67.9	2423	88198	19275	1
KOS-B_128	175.7	242.6	9.8	110.6	20.4	37.1	82.1	37.7	445	36104	774.9	277.7	47	1885	107302	18002	1
KOS-B_129	183.6	261.2	12.8	93.2	16.7	25.2	74.4	19.8	378.3	34748	591.3	358.5	65.7	2251	102720	16544	1
KOS-B_13	186.2	261.3	9.8	102	18.2	34.8	81.1	33.3	399.4	35684	690.7	316.8	55.1	2012	99384	17295	1
KOS-B_130	197.9	255.6	9.1	95.8	18.7	39.6	84.1	27.3	381.2	36980	579.6	431.2	60.4	2501	96062	19367	1
KOS-B_131	197.1	265.2	10.5	91.3	18	42	84.6	23.7	366.6	37258	582.4	423.5	68.9	2678	84796	19488	1
KOS-B_132	186.2	276.8	11	89.5	18.3	25.4	79.3	7.4	387.9	35696	628.6	320.4	66.4	2395	98816	16548	1
KOS-B_133	192.6	275	10.5	112.4	22.2	43.6	93.7	26.3	452.1	38588	849.1	267.3	62.8	2086	122740	19740	1
KOS-B_134	187.8	261.8	11.3	88.6	14.4	27.2	78.4	29.4	391.7	35066	523.6	400.7	73.1	2504	109957	18233	1
KOS-B_135	183.3	241.3	10.2	103.3	18.3	37.9	76.9	33.3	375.3	35761	649.3	358.1	51.3	1989	85663	16748	1
KOS-B_136	192	263.6	9.9	102.6	22	31.1	71.9	19.8	380.4	35247	634.8	367.1	61.5	2175	107086	18038	1
KOS-B_137	180.1	275.4	8	98	21.1	32.5	78.8	16.4	406.5	35351	767	339.2	68.9	2323	119872	18535	1
KOS-B_138	182.5	259.5	8.4	103.8	18.5	43.1	84.4	32.9	406.5	36901	689.6	350.2	67.3	2330	110311	19694	1
KOS-B_139	187.1	265.2	10.7	85.1	15.1	28	78.6	18.7	359	33922	478	395.8	66.5	2484	103777	17886	1
KOS-B_14	181.5	263.7	9.9	86.1	15.2	35.6	79.6	33.6	397.6	34924	603.2	375.2	73.2	2576	98631	18624	1
KOS-B_140	175.2	249.2	8.1	97.9	18.3	33.5	70.2	35.4	399	33607	670.8	339.5	56.9	1966	100033	16652	1
KOS-B_141	182.3	273.1	9.8	102.2	16.9	34.3	87.1	24.9	424.3	37252	706.1	292.1	63.7	2206	115834	17978	1
KOS-B_142	198.2	262.6	7.4	101.7	19.6	48.8	85.8	34.5	377.1	38571	699	422.2	63.4	2541	91911	19897	1
KOS-B_143	178	238.4	7.2	99.7	20.2	32.7	68.6	28.8	363.7	34081	624.8	391.8	51.3	2106	90686	16990	1
KOS-B_144	186.7	274.4	9	92.4	17.6	29.8	84.6	9.4	395.3	35516	666.1	338.1	61.3	2220	116272	17212	1
KOS-B_145	179.2	274.6	9.3	88	16.8	31.4	83.3	21.7	419.6	35322	698.2	344.7	69.4	2508	113315	18387	1
KOS-B_146	182.5	255.9	10.8	91.8	16.5	32.9	82.4	22.1	405.1	35623	638.7	335.3	58	2232	96691	16911	1
KOS-B_147	193.6	268.3	10.7	101.9	19.9	41.1	84.7	30.6	384	37663	708.2	401	66.3	2529	98299	20035	1
KOS-B_148	172.9	259.6	8.8	91.4	14.6	32.9	77.1	23.5	384.4	34265	614	283.1	59.3	2037	94573	15525	1
KOS-B_149	180.2	267.6	7.4	102.4	18.7	34.3	86	26.8	412	36225	718.9	314.6	58.5	2198	114379	18423	1
KOS-B_15	181.2	256.7	6.3	101.2	20	37	78.2	23.9	372.6	35000	637.2	338.5	53	2065	94930	17518	1
KOS-B_150	171.7	256.3	8.9	95.8	16.5	34.1	75.4	40.4	411.1	34183	647.7	320.8	64.5	2250	103221	18022	1
KOS-B_151	183.3	265.6	8.7	97.9	18.3	35.8	78.5	32.4	398.3	35091	681.3	360.4	61.8	2252	108702	18591	1
KOS-B_152	176.4	248.6	6.6	97	20.4	35.8	76.2	15.6	395	33501	739.1	279.2	36.8	1508	84907	14053	1
KOS-B_153	180.9	239.2	10.2	97.9	17.4	34.1	78.3	30.4	383.4	34980	587.5	379.4	51.4	2121	91190	17344	1
KOS-B_154	199.3	266.9	10.2	109.8	19.9	39.4	89.9	38.2	439.4	38290	743.6	342.2	63.1	2203	122780	19847	1
KOS-B_155	202.8	270.5	13.3	99	18.7	35.9	84.1	27.4	387.5	37963	577	403.5	81.8	2678	106292	20183	1
KOS-B_156	198.6	261.9	11.3	102.2	20.5	28.8	73.6	20.2	375.2	35655	552	364.9	66.6	2131	104713	17479	1
KOS-B_157	173.2	270.9	8.2	94.3	18.9	46.7	86.2	29.2	405.5	35902	839.6	309.5	63.9	2329	89639	18504	1
KOS-B_158	182.8	266.4	8.4	96.3	21.3	43.8	81.1	22	404.1	35268	800.2	349.6	68.4	2149	100589	18243	1
KOS-B_159	178.2	256.9	9.4	94.7	17.5	29.9	78	17	374.7	34592	590	369.9	65.7	2307	110739	17875	1
KOS-B_16	199.7	253.7	10.8	99.1	18.4	40.1	83	41.1	394.8	38716	598.6	440.1	66.3	2815	90862	20603	1
KOS-B_160	176.3	260.9	9.3	93.2	17.5	31.7	76.4	23.3	379.1	34223	615.8	357.9	62.5	2327	103231	17911	1
KOS-B_161	170.1	244.3	7.9	96.6	19.6	37.3	74.5	29.1	383.9	34233	667.8	341.8	61.6	2194	86412	17317	1
KOS-B_162	198.5	279.1	12.6	93.4	19.2	37.3	85	22.1	411.8	36701	675.9	361.6	74	2485	107703	19457	1
KOS-B_163	188.4	280.3	13.7	93.2	16.3	23	81.4	13.9	421.7	35171	637	277	66.3	2101	121175	16375	1
KOS-B_164	198.8	271	9.5	99.4	21.3	38.3	82.7	21.8	397.8	37092	681.1	369.9	61.4	2425	105095	19302	1
KOS-B_165	191.3	252.7	11.1	90.4	16.3	26.8	70	32.4	348.3	34431	430.6	467.2	71	2653	98238	18872	1
KOS-B_166	176.6	263.4	5.7	103.5	20.9	49.6	79.6	38.6	409.1	36520	805.4	357.2	71.3	2395	103901	20096	1
KOS-B_167	185.4	261	7.1	95.2	17.7	40.3	83.1	32.4	417	36496	709.3	350.4	59.3	2327	101817	18269	1
KOS-B_168	190.2	266.4	9.6	97.2	19.6	37.3	83.4	29.7	405.3	36970	696	374.2	62.9	2545	100297	19376	1
KOS-B_169	169.2	249.5	7.3	95.8	19.2	40.2	74.2	26.8	380.3	33818	715	329.7	58.9	1977	83344	16452	1
KOS-B_17	177.1	241.6	8.8	104.8	19.1	41.4	79.3	33.4	408.8	35738	733.8	282.9	46.7	1813	87418	16228	1
KOS-B_170	183.7	276.8	9.6	89.4	17.5	29.4	80.2	12.8	372.9	35804	617.2	403.6	72.9	2709	111098	18920	1
KOS-B_171	173.1	256.2	7.7	86.8	16.2	31.3	74.4	23.2	386.5	32820	616.6	338.5	61.5	2122	101572	16219	1
KOS-B_172	182.7	254.5	7.2	100.6	18.9	42.1	75.8	39.7	373.4	36072	655.6	410.9	61.7	2455	94053	19286	1
KOS-B_173	175.7	258.6	8.2	92.3	15.8	32.9	78.4	33.7	399.7	34484	655.8	327.9	61	2253	102156	17213	1
KOS-B_174	178.3	266.6	5.6	103.7	21.6	43.1	84.1	27.2	416.8	35797	838	336.2	52.4	2138	115238	19139	1
KOS-B_175	179.6	258.4	8.3	89.5	17.5	34.4	72.9	24.8	372.3	34447	636.3	372.1	58.7	2353	91301	17064	1
KOS-B_176	195	269.5	8	99.5	20	40	81.8	22.5	389	36066	688.2	363.2	59.2	2148	107064	18399	1
KOS-B_177	178.9	262	11.2	91.9	16.9	26.2	74.2	24.1	394.1	34922	587.6	360	63.6	2486	103760	17838	1
KOS-B_178	168.8	248.7	8.8	99.1	19.3	37.1	75	35.5	413.3	33598	745.8	350.5	62.5	2048	106738	18006	1
KOS-B_179	191	261.5	12.5	101.2	15.9	41.6	91.4	38.3	426.2	38020	688.7	319.8	62.1	2285	101488	18735	1
KOS-B_18	185.4	254.2	8.3	100.4	19	38	82.7	33.7	411.3	36786	685.6	371.5	55	2440	105333	19384	1
KOS-B_180	181.1	251.6	10.2	90.3	18.1	35.3	74	33.3	386.1	34893	635.5	414.1	72.4	2556	92185	18476	1
KOS-B_181	186.6	283	7.6	91.5	15.9	37.9	90.9	16.9	415.4	36637	706	275.5	59.8	2201	107186	17175	1
KOS-B_182	185	240.5	10.7	91.9	18.5	35.4	73	26.2	344	34325	539.3	425.4	59.5	2312	74803	17216	1
KOS-B_183	189.5	254	9.1	101.3	22.1	43	72.2	40.7	367.2	36583	656.4	470.3	77.8	2761	88946	21237	1
KOS-B_184	195.1	274.3	11.2	94	17.9	33.7	82.4	25.3	387.5	36483	576.3	399.7	79.8	2654	109809	19870	1
KOS-B_185	175.6	247.9	8.1	103.3	21.5	42	76	36.6	378.7	35022	694	408.4	68.9	2372	95261	20146	1
KOS-B_186	178.2	259.4	11.1	88.3	15	26.4	73.9	22.8	371.3	34137	538.8	377.7	67.7	2406	101738	16967	1
KOS-B_187	190.3	269.8	10.9	100.9	18.2	32.8	86	28.8	418.1	37014	655.1	319.9	59.1	2323	107999	18708	1
KOS-B_188	186	269.8	8.7	94.6	16.8	34.4	81.8	32.9	413.1	36000	639.1	335.7	73.4	2468	112774	18906	1
KOS-B_189	186.7	278.2	9	85.7	19.7	35.4	78.4	19.3	409.9	34584	668.1	397	80.4	2631	113531	19690	1
KOS-B_19	181.2	257	9.5	84.1	16	35.8	77.8	26.5	369.5	35303	548.8	445.9	75.5	2793	88636	18924	1
KOS-B_190	181.7	255.2	10.7	96.9	15.6	32	75.3	35	401.1	35333	586.8	330.4	65.2	2189	100736	17124	1
KOS-B_191	186.9	259.2	12.6	99.3	16.9	34.8	85.9	34.4	392.7	36768	559.9	407.7	77.9	2690	109929	20992	1
KOS-B_192	182.4	260.3	8.5	90.1	16.9	42.9	82.4	34.3	390.6	34839	703.3	388.2	69	2270	92890	18136	1
KOS-B_193	182.1	256.2	7.6	95	17.7	35.7	81.4	26.8	391.9	35157	659	316.4	48.1	2056	88616	16414	1
KOS-B_194	167.1	254.1	8.2	95.5	18.8	32	67.1	25.7	396.9	32510	699.4	268.6	54.8	1772	93553	14931	1
KOS-B_195	188.2	269	10.1	90.4	17.7	33	77.5	19.1	376.3	35269	616.9	413.5	70.4	2497	108288	18471	1
KOS-B_196	163.6	232.1	8.8	95.5	17	38.3	74.2	43.4	412.6	34373	742.5	301.6	50.6	2036	75385	15891	1
KOS-B_197	177.2	262.4	8.1	100.9	16.3	33.2	81.4	28.9	398	35392	656.2	314.2	55.8	2076	112004	17419	1
KOS-B_198	204.3	273.8	11.4	93	17.4	39.3	89	31	394.6	37956	568	445.2	81.3	2865	108696	21291	1
KOS-B_199	195	255.3	11.9	95.8	19.1	27.2	77.4	19	377.2	35425	547.9	408.8	61.1	2317	102574	17944	1
KOS-B_2	175.4	247	8.5	95	15.8	35.5	75.2	45.3	400	35226	621.3	380	63.3	2411	92806	18209	1
KOS-B_20	190.6	255.8	8.7	109.3	20.6	46.1	82.6	45.7	391.9	37538	730.1	422.8	65.2	2441	105213	21112	1
KOS-B_200	175.3	245.3	10.1	107.7	19	23.5	73	24	399	34373	623.7	290.6	46.2	1763	110968	15783	1
KOS-B_201	165	245.1	5.3	102.2	19.9	38.4	72.9	37.4	394.3	34060	753.1	342.8	56.5	2062	97696	17648	1
KOS-B_202	173.9	245.7	5	114	22.8	45.9	80.7	42.5	422	36831	862.7	329.3	48.5	2026	99657	19081	1
KOS-B_203	161.8	248.4	4.7	99.1	20.7	25	64.2	16.5	394.5	31649	721.2	250.8	43.8	1505	101771	13495	1
KOS-B_204	177.4	267.7	5.9	91.2	19.1	41.4	73.3	33.6	382.9	34395	746.8	412.2	75.3	2456	100338	18921	1
KOS-B_205	178.9	258.6	9.1	106.1	20.1	39.2	82.8	29.7	417.1	36504	738.6	311.4	59.5	2172	107501	18915	1
KOS-B_206	163.1	254.1	7.8	87.9	16.3	25.3	65.9	22.7	367.4	31532	578.4	338.8	62.1	2093	97437	15561	1
KOS-B_207	189.7	257	7.1	104.3	19	38.1	82.1	33.8	381.3	35885	624.5	367.8	55.5	2144	105696	18713	1
KOS-B_208	180.7	273.6	10.6	89	18.6	42.7	84.8	25.6	406.5	36141	754.1	371.6	81.2	2692	99842	19655	1
KOS-B_209	187.2	252.4	10.3	97.6	18.6	28.2	74.1	26	375.3	35567	590.9	382.8	58	2300	94038	17236	1
KOS-B_21	190.1	269.3	11.3	93.4	15.9	34.2	85.1	24.8	412	36080	607.5	313	68.5	2261	108770	17579	1
KOS-B_210	189.6	256.7	8.2	96.1	19.1	45	76.7	42.8	380.4	36664	621.3	426.8	84.3	2706	88373	20321	1
KOS-B_211	176.6	255.5	7.5	95.5	18.8	33.4	68.1	34.4	364.5	33147	614	412.4	71.3	2286	103621	18237	1
KOS-B_212	159.7	257.1	4.4	90.4	15.3	38.7	80.7	29.8	419.2	34028	742.1	271.8	50.2	2074	98069	16450	1
KOS-B_213	192.7	256.6	12.1	92.7	16.5	34.8	79.1	31.8	389.1	35729	561.4	382.7	66.9	2374	95043	18034	1
KOS-B_214	187.1	268.3	9.8	96.8	19.2	42.7	80.3	36	392.6	36212	678.9	412.4	81.1	2617	103858	20450	1
KOS-B_215	192.6	267.8	11.1	91.3	15.9	37.4	86.3	29.6	397.5	37040	585.1	382.4	69.5	2661	101182	19425	1
KOS-B_216	197.8	276.7	11.8	93.6	16.4	22.8	82.2	19.6	400.2	35968	523	374.5	70.6	2526	129293	18910	1
KOS-B_217	191.1	265.3	13.2	98.7	18.5	32	83.4	26.8	403.9	36579	625.2	354.5	69.8	2440	106081	19005	1
KOS-B_218	174.9	267	10.2	94.3	16.3	34.7	87.7	28.9	443	35621	758.5	261.8	52.1	2187	109276	17542	1
KOS-B_219	185.6	252.9	8.5	93.9	18.6	27.8	72	25	363.7	34296	547.6	434.2	65.5	2417	105520	18276	1
KOS-B_22	180.2	246.8	10	100.5	19	32.4	74.2	33	402.2	34375	699.8	335.9	50.1	1935	99890	16665	1
KOS-B_220	184.4	255.2	10.2	100.3	16.7	36.8	82.4	29.2	386	35899	613.1	323.6	55.3	2038	93291	17022	1
KOS-B_221	184.3	267.2	8.6	102.2	21.2	44.4	82.9	28.7	410.2	36350	824.8	331.6	62	2137	100981	18591	1
KOS-B_222	185.2	253.4	8.2	106	18.1	39.8	80.8	39.3	404.5	36488	686.1	338.3	55.3	2048	103797	17831	1
KOS-B_223	186.8	258.5	9.7	93.1	16.5	38	81.1	38.2	399.9	36510	616.3	407.4	66.8	2678	100703	19690	1
KOS-B_224	180	262.6	7.3	96.7	16.2	40	83.2	37.3	401.8	36089	652.9	380	68.4	2509	112674	19841	1
KOS-B_225	198.2	267.9	11.8	95.4	19.3	33.3	79.3	31.7	409.2	36565	653.1	419.1	77.6	2624	113218	20031	1
KOS-B_226	178.2	237.8	9.2	100.7	18.4	37.5	76	37.2	384.8	34448	622.3	401.8	61.6	2184	104185	18639	1
KOS-B_227	191.1	264.2	7.7	101	19.9	42	89.2	23.7	383.3	37322	718.9	360.2	50.1	2294	94662	18695	1
KOS-B_228	171.9	265.1	8.4	101.5	17	31.7	84.9	27.5	456.2	35382	802.1	205.3	45.6	1767	117447	15804	1
KOS-B_229	173.3	263.8	6.8	98	21.6	42.3	77.1	22.9	383.9	35020	780.3	357.5	72.6	2310	98586	18582	1
KOS-B_23	191.9	273.6	8.4	93.2	17.9	38.3	87.4	30.1	407.4	36347	649.9	393.6	70.6	2585	112802	20268	1
KOS-B_230	177	251.1	9.4	100.6	17.4	40.1	83.8	37.7	423.3	36341	750.4	305.1	59.3	2126	97045	17644	1
KOS-B_231	178.3	246.7	8	90.7	15.4	32.8	68.7	27.2	347.9	33214	541.4	336.1	52.9	1918	78960	14493	1
KOS-B_232	185.5	269.3	10.1	86.3	16.9	15.1	69.3	16.2	360.9	33263	494.9	419.8	63	2549	113013	17408	1
KOS-B_233	193.3	265.6	14.6	94	18.8	26.5	79.7	13.3	413.1	36044	631	354.7	73.1	2282	109976	17323	1
KOS-B_234	182.6	261.7	9.3	83.9	15.1	22.1	74.2	16.8	386.7	33996	476.3	376.6	73.2	2463	108703	16924	1
KOS-B_235	185.2	274.1	9.5	97.1	16.8	34.6	91.5	20.9	415.9	36968	676.2	330.4	63.2	2394	117872	19073	1
KOS-B_236	167.3	231.2	9	91.2	16.2	22.5	63.7	28.9	373	32400	533.1	362.3	48.6	2093	90368	15199	1
KOS-B_237	176.3	238.8	8.3	94.7	16.2	34.1	75.7	35.9	394.7	34295	570.5	349.1	55.2	2112	91595	16881	1
KOS-B_238	170.4	266.1	8.4	94.1	19.2	34	79.6	24.1	431.8	34446	749.8	324.3	70.9	2336	119379	18724	1
KOS-B_239	169	245.7	7.7	97.2	18.5	36.8	75.1	35.9	400.4	34412	700	343.4	58.6	2164	89989	17484	1
KOS-B_24	178	241.7	9.6	101.3	18.5	32.4	76.8	24	392.7	35170	637.7	297.3	51	1879	89900	15576	1
KOS-B_240	176.7	244.6	9	92.3	13.2	34.6	79.9	47.4	397.1	35526	548.9	397.6	64.3	2541	96641	18742	1
KOS-B_241	186.9	253.4	9.7	92	18.8	31.8	71.8	24.7	370	34201	558.5	412.9	64.3	2281	91865	17433	1
KOS-B_242	175.3	274.1	8.8	81	16.6	40.8	84	21.9	413.2	34590	739.9	346.2	78.2	2470	96348	17878	1
KOS-B_243	188.2	278.7	8.4	84.1	15.1	39.4	90.1	15.1	401.1	35284	630.7	305.9	62.8	2181	97749	16753	1
KOS-B_244	199.2	268.5	12.1	121	24	41.1	88.6	34.4	415.4	39057	761.5	357.7	58.5	2310	120009	21899	1
KOS-B_245	185.7	266.9	6.8	79	14.7	31.3	76.3	24.5	367.1	34237	527.4	427.3	67.9	2675	97490	17781	1
KOS-B_246	177.8	245.6	7.1	95.7	16.2	32.9	75	32.4	386.7	34676	605.3	315.1	55.7	1918	84595	15054	1
KOS-B_247	182.7	251.7	9.9	93.4	17.1	31.3	75.9	34	393.1	34869	616.2	371.1	58.3	2304	95092	17368	1
KOS-B_248	193.1	256.9	8.7	107.6	20.1	47.4	92.1	39.9	429.1	38350	760.8	348.1	54.1	2179	98019	19601	1
KOS-B_249	172.1	252.5	6.9	92.9	16.8	38.4	74.5	33.2	401.4	34665	706.7	322.1	52.7	2161	91853	16578	1
KOS-B_25	168.3	240.9	8.6	104.2	21.1	41.3	77.6	40	414.8	34991	783.6	376.6	64.1	2303	106331	19912	1
KOS-B_250	188.7	270.8	13.2	95.5	18.6	32.4	86.4	17.6	417.6	36255	714.2	331.8	63.3	2360	115818	18593	1
KOS-B_251	184.6	259.7	10.1	95.1	17.1	39	83.4	32.4	397.1	35569	650	352.6	64.1	2254	95526	18314	1
KOS-B_252	172.7	255.1	6.5	113.3	21.5	47.5	82.2	40.7	431.5	36562	836.5	304.7	66	2000	111819	19443	1
KOS-B_253	193.9	273.3	12.9	86.4	17.6	30.1	77.6	24.9	381.6	35071	569.4	421.6	81.9	2670	100053	19022	1
KOS-B_254	177.2	250.7	9.4	101.9	19.1	29.4	77.5	21.2	405.6	34478	666.7	314.2	52.8	1889	112032	16593	1
KOS-B_255	185.7	266.4	13.4	88.4	15.1	24.5	83.2	15.8	399	34988	568.8	329.4	62.2	2316	107047	16957	1
KOS-B_256	187.3	260.3	9.8	101.8	18.9	35.7	80.1	43.1	422.2	36695	683.9	393.1	71.2	2579	117347	20488	1
KOS-B_257	183.4	268.9	9.6	94	16	36.7	86	34.6	431.5	35691	688.8	279.5	57.2	2216	106344	17774	1
KOS-B_258	194.3	280.8	13.5	101.3	20.9	32.1	84.7	23.5	430.3	37013	716.7	360.7	77.7	2543	126068	20688	1
KOS-B_259	177.7	253.6	8	96.7	17.1	33.9	73.9	38.1	374.1	34753	618.9	365.2	60.1	2335	93374	17929	1
KOS-B_26	187.1	260.4	10.8	98.8	16.6	29.7	81.2	32.9	411.8	36228	623.1	340	62.4	2298	110215	17901	1
KOS-B_260	184	256.9	7.3	98.4	20	44.5	79.2	24.5	386.2	35373	745.8	323.6	55	1894	85540	16480	1
KOS-B_261	189.3	263.6	9.3	100.9	18.7	36.8	78.5	24.7	379.5	36564	606.6	345.7	66.8	2273	98116	18036	1
KOS-B_262	184.3	278.2	7.7	95.4	21.1	46.3	87	24.4	408.7	36780	848.6	371	71.6	2545	105347	20121	1
KOS-B_263	169.4	248.8	10.5	92.7	15.2	35.9	83.4	37.4	438.6	34870	703.5	293.5	57.5	2169	97904	17299	1
KOS-B_264	185	258.8	6.7	88.3	14.5	34	77.6	33.3	360.3	35558	495.3	454.6	70.7	2752	101124	19321	1
KOS-B_265	177.3	242.5	9.1	103.8	18.8	37.1	77.6	27	356.1	35390	601.9	377.1	56.8	2172	92104	18001	1
KOS-B_266	163.3	267.2	4.6	91.8	17.5	39.7	79.4	25.4	420.9	34039	819.6	271.3	57	2062	105832	16679	1
KOS-B_267	184.8	262.4	11.2	88	17.3	22.3	72.5	14	391.3	33583	555	363.6	66.1	2201	109538	16325	1
KOS-B_268	164.9	251.9	6.3	99.4	18.8	38.1	73.4	29.8	382.5	34049	737.9	334.4	58	2125	101372	17456	1
KOS-B_269	179.2	256.2	11.2	77.8	15.2	27.3	64.5	31.8	356.7	32554	511	447.2	78.4	2686	85571	17518	1
KOS-B_27	187	269.8	9.4	91.2	16.6	30.9	80	22.1	368.7	35478	553.2	384	66.3	2525	100425	18348	1
KOS-B_270	185.1	256.1	7.7	107.4	19.7	40.4	80.4	40.4	414.7	37111	727.4	350.3	62.7	2300	110963	19421	1
KOS-B_271	190.9	268	10.1	96.1	15.7	31.9	85.2	25.3	410.6	36238	644.9	298.2	56.2	2083	108687	16730	1
KOS-B_272	184.4	262.8	11.9	88.1	15	26.5	76.9	28.2	397.9	34982	532.3	391.9	70.3	2583	108930	18366	1
KOS-B_273	175.3	245.9	8.4	94.8	17.7	31	72.4	21.5	380.1	33326	632.8	300.7	46.3	1763	89082	14579	1
KOS-B_274	189.5	271.9	11.3	91.3	16.4	32.3	87	22.5	417.7	36758	632.4	315.2	63.3	2429	100860	17794	1
KOS-B_275	193.6	262.3	12	96.8	16.5	30.4	81.6	21.4	382.9	35544	529.2	346.9	60.3	2136	105215	17431	1
KOS-B_276	170.7	249.4	10.7	94.1	17.3	30.7	75.2	27.2	386.4	33678	601.9	373.4	66.4	2327	105277	18233	1
KOS-B_277	186.3	257.4	12.1	90.4	14.2	30	75.5	34.7	374.4	35131	479.4	383.8	77	2482	93571	17839	1
KOS-B_278	174.7	262.4	9	106.7	21.4	35.1	79.3	27	424.1	35641	814.3	306.4	58.8	2081	116187	18429	1
KOS-B_279	172.4	262.7	9.9	97.1	18.7	28.7	76.4	17.8	423	33842	758.2	242.1	53.8	1731	106496	14863	1
KOS-B_28	181.5	277.5	8.1	95.9	18.9	34.8	84.2	17	418.5	35687	737.4	301.9	60.4	2192	113536	17880	1
KOS-B_280	173.2	253.3	12.6	86.3	14.9	20.9	70.2	24.8	399.8	32513	569.9	310.4	61.6	2034	96250	14829	1
KOS-B_281	172.5	260.9	9.3	80.8	13.6	22.7	69.5	23.2	374.5	32579	491.2	381	65.8	2478	103023	16875	1
KOS-B_282	170.1	244.4	6.5	104.1	20.2	41.5	75.3	37.2	393.4	35092	728.1	372.2	60.3	2242	102324	18933	1
KOS-B_283	177.5	246.8	8.5	112.5	21.3	38.2	79.4	27.9	422	36130	783.1	265.2	44.6	1675	103511	16537	1
KOS-B_284	192.5	276.8	11.3	92.2	19.4	26.5	72.9	11	369.9	34366	600	374.8	67.1	2290	110718	17437	1
KOS-B_285	195.8	258.4	12	105.9	19.3	36	80.7	37.4	382.2	36738	610.4	412.4	69.7	2392	108839	20007	1
KOS-B_286	183.7	258.4	11.4	94.3	18.9	33	76.4	29.9	416.6	35627	710.2	358.3	65.6	2328	97349	17650	1
KOS-B_287	197.7	265.1	11.8	106	19.5	33.6	78.3	37.7	378.9	37393	603.5	421	72.6	2587	108620	20473	1
KOS-B_288	175.6	266.5	8.3	93.7	17.4	33.5	79	26.1	395.2	34969	653.9	370.2	69.4	2450	110366	18827	1
KOS-B_289	188.1	269.8	8.1	98.8	20.4	36.8	78.6	29.9	392.9	34846	710.8	364.2	60.2	2167	106421	18454	1
KOS-B_29	183.4	252.9	10.4	86.7	14.2	18.8	71.8	20.3	355.6	33224	386.8	401.9	58.5	2382	104222	16794	1
KOS-B_290	192.7	273	9.8	111	24.2	37.8	85	17.3	426.3	37040	825.5	303.7	50.2	2000	120294	19043	1
KOS-B_291	186.4	269.9	5.5	110.8	22.9	45.8	87.3	32.5	413.8	37187	801.4	349.1	65.8	2284	120783	21025	1
KOS-B_292	180.9	263.6	10.7	103.7	19.6	38.8	83	29.2	397.7	36149	731.6	333.2	62.8	2232	103657	18977	1
KOS-B_293	186.8	260	13	99.5	18.3	34.4	85.1	23.3	402.8	37954	652.5	366.3	68.5	2582	98929	19138	1
KOS-B_294	178.3	253.8	7.9	96.1	17.2	33.1	76.9	29.6	389.8	34554	623.1	340.8	59.4	2158	103355	17181	1
KOS-B_295	176	251.9	9.4	93	17.2	35.8	78.4	29.8	381.7	35649	648.1	368.5	64.3	2448	84259	17713	1
KOS-B_296	176.7	255.4	9.3	100.1	17.3	37.1	79.7	43.8	422.4	35069	693.7	347.2	62	2254	110479	19238	1
KOS-B_297	184.3	260.7	8.5	105.6	18.6	39.1	82.2	36.2	395.3	35813	672.9	328.6	60.6	2100	108788	18799	1
KOS-B_298	192.7	263.1	9.6	95.3	17.3	31.9	79.1	35.9	400.7	35269	609.4	402.1	62.8	2392	115854	18984	1
KOS-B_299	194.8	280.7	12.4	101.6	18.9	34.4	86	33.2	436	37926	730.2	340	76.1	2564	120244	20282	1
KOS-B_3	179.5	275.3	9.9	93.7	17.5	32.5	83.7	20.5	417.8	36393	715	320.5	66.9	2483	111805	18298	1
KOS-B_30	183.2	257.9	9	104.2	22.2	38.5	75.7	29.1	379.5	35609	724.3	390.6	67.3	2274	98800	19071	1
KOS-B_300	179	277.4	8.4	92.5	19.5	32.8	79.4	12	401.3	33346	753.8	272	52.5	1816	105052	15874	1
KOS-B_301	191.5	273.2	6	90.8	20.1	37.8	73.2	13.3	366.6	35313	701.5	365.1	57.6	2134	87866	16053	1
KOS-B_302	188.3	256.7	8.8	104.7	19	39.5	80.7	38.1	404.3	37191	677.5	368.5	64.1	2335	103633	19199	1
KOS-B_303	171.1	248.4	6.9	103.3	20.7	50.8	78.9	34.9	391.6	36018	841.9	319.3	56.2	2044	78350	17566	1
KOS-B_304	176.7	255.9	11.6	91.5	14.1	28.9	78.7	29.5	384.7	34844	535.2	342.1	66.3	2356	96293	17217	1
KOS-B_305	175.9	237.5	8.8	97.5	18.8	29.6	64.3	21.8	343.3	32449	578.8	327.4	41.2	1657	77056	13924	1
KOS-B_306	176	265.4	7.2	111.4	23.4	52	86.8	40	423.5	36808	898.4	354.9	73.1	2352	117873	21839	1
KOS-B_307	179.7	260.4	8.3	106.4	21.6	40.3	81.2	29.6	439.1	35733	846	280.1	53.7	1878	111282	17937	1
KOS-B_308	192.8	281.3	11.7	84.3	16.4	29.2	76.9	19.6	375.9	34603	534.6	408.8	81.3	2641	108219	18845	1
KOS-B_309	193.8	263.6	12.5	88.2	17.4	32.5	79.6	22	385.2	35376	559.9	409.7	72.8	2515	99399	18443	1
KOS-B_31	179.6	250.8	9.6	82.4	14.1	32.2	71.7	30.3	354.5	33597	517.1	408.9	59.7	2371	76356	16238	1
KOS-B_310	175.3	242.3	6.1	100.6	18.1	34.5	68.2	38.9	366.4	33614	598.7	379.5	55.4	2030	96231	16982	1
KOS-B_311	189.9	275.9	9.7	93.9	20.2	37.5	79.2	19	387.2	35652	684.9	370.1	69.7	2371	98715	18668	1
KOS-B_312	185.5	276.3	10.5	91.2	18.6	31	80.5	15.1	393.2	35324	684.1	329.5	64.6	2328	101669	17319	1
KOS-B_313	180.5	242.6	6.9	102.9	20.9	32.6	70.6	25.7	394.5	34602	677.6	344.1	48.2	1863	98386	16279	1
KOS-B_314	192.5	261.2	13.3	88.1	16	21.8	74.1	22.2	389.8	34631	502.6	388	67.5	2421	106998	17138	1
KOS-B_315	185.7	272.7	8.3	98.9	17	44.8	92	30.5	418.3	37419	745.4	312.8	64.1	2282	106576	18930	1
KOS-B_316	192.6	266.3	8.5	103.7	20.9	35.3	80.1	31	385.2	36345	636.9	420.5	72.4	2529	117409	20800	1
KOS-B_317	194.2	265.4	8.9	101	20.3	35.3	79.7	23.9	374.8	36740	630.6	409.1	63.9	2458	105538	19284	1
KOS-B_318	174.4	252.2	9.5	86.3	15.5	33.2	73.8	34.3	389.1	32988	632.2	351.9	64.5	2166	90538	16393	1
KOS-B_319	189.9	262.5	10.5	89.6	14.5	30.4	81	27.7	398.7	34996	527.9	356.2	60.9	2248	105109	17157	1
KOS-B_32	181.6	245.3	10.6	104.8	19	34.8	77.8	32.5	392.7	36073	670.6	359.8	54	2147	97847	17936	1
KOS-B_320	192.8	260.6	13.2	95.8	15.9	30.3	85.5	24.3	405.4	36293	565.6	320.5	60.1	2210	103926	17307	1
KOS-B_321	179.9	278.7	5.9	92.6	19.1	39.8	80	22.3	390.4	35237	741.6	363.3	71.7	2422	108987	18778	1
KOS-B_322	186.9	258.8	10.3	99.5	20.3	31	77.2	21.7	402.9	35543	667.3	356.6	62.3	2198	106906	17871	1
KOS-B_323	174.1	248.8	11.6	84.1	14.6	25.7	68.6	23.1	362.7	31732	489	367.3	70.2	2100	93245	15664	1
KOS-B_324	170.3	257.2	8.6	97.7	18.2	34.5	73.4	34.7	405.7	34681	687.6	325.4	64.2	2307	101255	18192	1
KOS-B_325	168.5	249.4	8.8	93.6	17.2	29.2	72.1	27.4	405	33160	666.4	314.8	54.5	2010	103634	16121	1
KOS-B_326	191.5	254.2	10.7	96.2	17.1	27.1	74.6	25.8	370.8	35558	506.5	379.4	57.3	2308	96250	17175	1
KOS-B_327	169.9	244.5	8.2	95.6	14.1	31.1	73.3	32.1	387.3	33931	577.6	275.3	50.9	1836	89742	14498	1
KOS-B_328	169.9	244.9	8.3	98.3	18.3	26	69.5	25.6	391.8	33779	626.4	325.1	52.6	2047	101332	16104	1
KOS-B_329	176.2	254.3	10.2	100.6	19	38.3	81.2	30.2	418.9	35734	740.7	320.3	62.2	2178	103317	18286	1
KOS-B_33	176	262	8.3	107.4	22.2	40.1	79.5	31.3	434.4	34995	837	286.5	62.7	1881	115426	18266	1
KOS-B_330	176.6	253.6	9.5	103.5	20.5	36.9	81.3	28.5	416.2	34947	742.2	318.2	56.7	1992	106559	18125	1
KOS-B_331	177.9	239.2	9.9	93.7	17.3	30.3	72.3	34.2	395.9	33464	584	317.2	51.4	1968	84721	15714	1
KOS-B_332	185.8	251.2	7.2	98.9	20.2	37.7	75.2	27.3	366.6	35336	617.1	426.6	59.2	2326	96009	18706	1
KOS-B_333	184.7	260.6	8.2	108.6	21.1	46.3	85.7	35.9	401.7	37285	764.9	340.8	61	2230	99003	19609	1
KOS-B_334	190.8	261.2	9.6	101.1	19.8	35.2	77.6	28.9	381	35521	620.7	395	70.1	2294	110344	18932	1
KOS-B_335	195.8	273.7	10.7	89.6	16.7	34.6	84.5	34	402	35477	559	400	75.6	2644	112383	20186	1
KOS-B_336	187.9	270.4	8.8	101.1	19.5	43.1	88.6	26	419.4	38051	789.6	354.8	65.4	2440	111738	19693	1
KOS-B_337	185.9	257.8	7.8	107.5	22.3	45.6	80.8	35.1	382.7	36759	781.9	391.9	65.5	2323	100498	19970	1
KOS-B_338	189.2	256.6	9.7	96.5	14.5	37	81.7	41.8	388.3	36974	537.8	386	70.7	2545	98911	18897	1
KOS-B_339	186	265.9	9.4	89.5	17.4	34	79.9	28.3	379.8	35573	599.5	426.2	72.4	2719	100266	19715	1
KOS-B_34	186.2	274.4	9.8	108.4	19.8	44.6	91.7	38.3	416.5	38360	762.3	378.6	72.7	2707	123562	22925	1
KOS-B_340	201	256.5	12.4	101.2	18.3	35.3	80	43.7	406.9	37932	607.2	425.3	70.6	2666	105041	20266	1
KOS-B_341	177.2	266.7	8.4	94.1	17.3	40.4	87.4	26.9	409.3	36030	718.4	326.9	68.3	2397	104235	18846	1
KOS-B_342	189.5	242.4	10.1	100.6	16.8	39.9	76.4	46.9	362.4	36731	507.8	457.3	75.8	2659	91432	20257	1
KOS-B_343	179.4	252	9.5	95.5	18.8	37.1	73.8	32.4	372.6	34441	646.7	419.3	68.6	2358	96826	18669	1
KOS-B_344	191.4	248.9	13.2	106.6	15.1	26.6	76.9	36.6	377.9	36486	454.2	369.6	67.2	2229	111219	18094	1
KOS-B_345	196.2	275.5	9.6	100.5	18.3	38.2	86.1	18	401.4	36468	639.5	294.6	63	1979	110795	17367	1
KOS-B_346	173.6	243.5	9.5	94.3	15.6	33.4	74.2	42.6	401.5	34513	601.4	361.8	67.6	2338	98807	17646	1
KOS-B_347	185.9	261.2	8.2	106.8	20	43.2	87.9	25.7	397.1	37458	731.7	307.1	46.7	2108	97188	18308	1
KOS-B_348	187	252.7	10.5	102.5	21.5	35.3	81.7	21.1	404.7	35539	718.9	362.5	55.4	2074	108609	18116	1
KOS-B_349	184.3	261.6	7.9	102.5	20.3	36.2	79.1	24.7	388.3	35861	688.6	355.4	57.8	2176	103490	18119	1
KOS-B_35	193.2	261.8	10.8	95.8	18.3	31.2	81.2	23.4	402.1	36533	620.1	388.6	64.8	2444	109821	18440	1
KOS-B_350	185.6	264.4	5.8	117.7	23.8	45.8	82.1	35.3	403.2	37219	838.9	345.4	61.8	2031	117057	19822	1
KOS-B_351	181.5	258.6	6.7	101.6	20.4	43.5	76.6	33.4	384.6	35644	722.1	382.5	67.9	2264	100146	19042	1
KOS-B_352	178.3	239.7	8.8	91.4	15.1	32.8	70.8	42.2	374.6	34482	536.8	420.3	65.4	2438	89738	17745	1
KOS-B_353	182.2	266.8	9.2	107.2	19.5	36.1	90.4	23.4	430.7	36795	787.8	267.1	45.9	1949	116412	17942	1
KOS-B_354	185.6	259.2	8.1	95.5	18.5	39.6	81.4	24.2	392.9	35659	671.3	333.8	59.2	2145	95480	17205	1
KOS-B_355	183.7	258.5	12.2	95.3	16.1	25.2	76.5	19.2	361.9	35114	534	363.7	64.8	2325	103102	17037	1
KOS-B_356	182.3	260.8	11.9	92.4	17	30.9	72.6	19.7	362.8	34642	580.9	346.4	70.8	2223	90474	16233	1
KOS-B_357	189.7	250	9	103.1	20.4	45.9	81.6	35.6	382	36780	704.5	401.7	62	2308	91972	19365	1
KOS-B_358	201.3	275.1	9.7	111	22.8	47.5	91.4	34.2	429.4	39631	791	369.8	71.3	2501	112982	21727	1
KOS-B_359	183.7	251.9	11.1	85	15.6	32.3	75.3	33.9	389.5	34260	550	397.6	67.5	2518	90795	18016	1
KOS-B_36	193.6	272.2	11.9	96.6	19.7	34.7	85.9	20.4	385.8	36819	614.9	424.3	77.8	2767	115713	21154	1
KOS-B_360	175	240.4	9	95.2	15.9	26.7	67.8	36.3	380.6	33904	520.4	344.5	58.8	2173	90965	16274	1
KOS-B_361	175.4	269.2	8.4	99.9	20	36	78.8	27.3	411.7	35050	809.9	290.5	56.9	2066	102495	17398	1
KOS-B_362	188.7	251.5	8.8	107.4	20.8	38.8	76.9	43.1	401.3	36798	707.6	386.4	63.4	2337	103009	19336	1
KOS-B_363	196.1	273.1	10.8	97.9	19.4	37.8	87.9	23.9	389.2	36826	639.7	387.1	69.3	2460	103464	19928	1
KOS-B_364	164.1	255.8	7	90.7	19.1	34.7	70.6	27.3	376.8	33283	719.3	357.3	56.7	2346	87689	17341	1
KOS-B_365	166.3	240.5	9.5	88	15.3	27.5	67.5	32.6	386.3	33038	586.1	370.2	58.2	2262	89752	15981	1
KOS-B_366	178.3	261.9	8.6	100	19.4	33.8	80.8	25.9	410.1	35023	715.1	326.5	59.6	2108	109355	17919	1
KOS-B_367	193.9	248.5	13.7	107	18.2	35	82.3	35.4	406.8	37347	632.6	336	60.2	2128	102313	17841	1
KOS-B_368	170.3	264	7.9	99	20.6	34.7	73.6	17.8	381	34158	750.4	310.2	63.2	2099	103355	17088	1
KOS-B_369	181.9	254.5	10.4	91.8	18.9	30.5	75.1	21.2	364.8	34039	611.7	418.2	63.1	2351	97176	17792	1
KOS-B_37	169.6	239.1	6.4	91.3	18	37.1	71.2	35.8	394.1	33395	671.6	374.4	60.4	2168	89352	16869	1
KOS-B_370	173.2	254.2	7.5	94.5	18.1	45.2	82.9	37.3	419.4	35436	764.6	346.1	61.2	2344	97302	18992	1
KOS-B_371	180.2	255.9	8	105.1	18.7	41.9	83.1	35.7	412.3	36201	740.5	299.5	53.6	1995	101231	17851	1
KOS-B_372	167.2	242.9	9.2	88.4	16.6	27.7	70.2	26.9	388.2	32254	644.7	338.6	50	2045	93833	15509	1
KOS-B_373	188.7	284.1	7.7	91.5	18.2	42.9	92.6	17.4	402.9	37762	738.1	388	77	2770	115008	20681	1
KOS-B_374	193.1	281.7	10.4	96.9	18.1	37.1	87.8	23.3	400.7	37198	671.4	351.7	76.2	2512	113119	19537	1
KOS-B_375	185.9	263.2	9.8	120.4	24.1	42.5	91.1	26.6	443.9	38246	865.2	248.1	56	1812	115010	18900	1
KOS-B_376	190.8	268	11.8	82.5	17.2	32	75.1	22.8	370.6	34532	567.2	421.6	73.5	2623	89490	18129	1
KOS-B_377	192.3	258.7	11.6	99.5	18.4	31.5	81.6	18.6	405.4	36191	610.4	317.9	56.9	2069	106415	16973	1
KOS-B_378	179	260.2	7	96	18.8	40.7	73.7	28.4	368.1	34415	648.7	348.8	68.2	2125	89337	17269	1
KOS-B_379	184.3	259.4	10	97.8	18.6	37.5	77.8	37.6	386.5	36264	681.6	425.8	74.6	2665	105635	20025	1
KOS-B_38	171.1	249.4	6.5	97	17.4	35.1	76.6	27.9	388.2	33884	678.3	334.4	50.2	1959	101547	16572	1
KOS-B_380	182.5	262.6	12.1	94.5	16.4	19	68.8	26.7	389.6	34220	519	370.4	71.1	2447	120017	17723	1
KOS-B_381	176.8	269.8	9.4	102	19.6	32.6	79.9	29	427.3	35306	761.3	310.4	67.9	2200	121306	18519	1
KOS-B_382	169.2	256.4	10.9	92.3	16.1	33.3	76	33.2	396.7	33490	660.5	325.6	63.7	2160	96282	17080	1
KOS-B_383	197.3	257.5	7	109.4	23.1	44.1	78.5	32.2	386.8	37530	696.4	394.3	64.1	2263	100805	19598	1
KOS-B_384	168.1	254.7	7.4	93.9	17.9	35.9	74.3	30.9	395.3	33429	679.6	329.3	65.2	2159	100209	17496	1
KOS-B_385	185.2	255.7	9.1	97.2	17.6	46.5	86.1	40.8	401.3	37649	705.3	393.4	65.5	2632	90203	20005	1
KOS-B_386	167.2	247.2	7	97.6	18.6	39.3	79.1	28.1	407.6	34200	738.8	299.8	48.7	1943	94238	16774	1
KOS-B_387	175.1	246.1	8.1	94.8	16.7	37	74.4	30.8	385.1	34568	631.8	340.4	58.9	2084	88645	16655	1
KOS-B_388	184.6	260.5	7.7	102.1	19.5	42.8	83.5	32.4	407.9	36023	728.3	338.7	60.4	2106	103008	18605	1
KOS-B_389	185.6	253.6	11.8	97	18	26.4	75	30.4	410.3	34876	575.4	369.6	67.5	2284	111322	18004	1
KOS-B_39	171.7	244.1	8.7	90.6	13.5	23.3	73.6	28.8	401.7	32779	553.4	267.2	40.2	1760	96595	13899	1
KOS-B_390	184.4	264.4	7.9	88.1	15.2	36.9	80.9	26.6	379.4	35056	597.4	372.3	64.2	2344	97482	17552	1
KOS-B_391	188.1	259.3	8.4	83.7	15.3	33.8	81.4	25.2	373.1	34874	543.4	408.9	56.9	2463	88988	17418	1
KOS-B_392	199.6	276.7	11.3	90.8	15.5	34.5	84.3	29	397.1	37112	556	415.5	80	2775	117899	20187	1
KOS-B_393	186.9	247.9	11.2	95.1	21.4	31.6	60.5	31.5	345.8	33369	576.3	470.4	75.7	2419	89820	18378	1
KOS-B_394	191.3	258.1	11.7	86.2	15.1	28	76.9	27	375.4	34756	474.2	396.7	65.3	2495	94098	17574	1
KOS-B_395	188.1	263.6	10.7	104.5	19	41.9	86.4	40.5	424.5	37776	715.1	349.8	71.1	2487	107394	20399	1
KOS-B_396	180.3	245.2	8.5	89.4	20.1	25.9	61.4	28.5	344.3	33121	544	459.8	64.2	2557	83340	17757	1
KOS-B_397	182.8	253.4	7.7	96.5	20.2	35.4	74.7	24.8	389.3	34325	696.4	364.1	51.1	2037	97393	16930	1
KOS-B_398	194.6	268.2	12.3	102.6	19.5	34.8	85.8	29.7	419.9	37021	677.5	352.9	68.6	2380	116473	19841	1
KOS-B_399	178.4	240.4	8.5	108	21	41.1	68	42.2	367.8	33653	709.5	352.4	53.5	1735	88388	16879	1
KOS-B_4	179	261.9	8.7	95.8	18.6	32.9	80.3	22	408.7	35150	719.6	311.1	52.7	2125	103157	16891	1
KOS-B_40	189.4	265.8	10.6	94.4	18.2	28.8	79.3	17.5	395.4	34663	629.4	307.6	52.5	1971	101872	15869	1
KOS-B_400	198	277.6	11.8	86.2	16.4	33.4	85.4	23.5	400.2	35989	598.5	392.1	75.2	2610	109298	18993	1
KOS-B_401	180.5	269.7	6.8	110.9	20.5	38.8	87	25.7	436.3	36534	816	253.3	47.8	1816	123327	17949	1
KOS-B_402	181.3	255.1	7.8	101.9	16.6	35.6	81.3	42.9	413.7	36295	661.1	345.5	60	2325	111959	18765	1
KOS-B_403	190.7	268.9	11.2	92.7	15	28.4	80.7	31.8	376.5	36189	490.9	409.6	78.8	2758	110383	19739	1
KOS-B_404	179.5	257.9	10.9	100.8	16.6	37.9	82.3	41.3	426	36082	674.2	318	67.1	2288	108654	18871	1
KOS-B_405	189.6	262	6.8	94.4	17.8	41.5	81.6	29.2	358.2	36180	602.9	418.3	59.9	2525	93382	19148	1
KOS-B_406	184	268.8	8.3	105.7	22.3	50.4	87.7	28.6	416.7	36537	857.2	335.8	70.2	2125	110213	19955	1
KOS-B_407	198.7	264.3	12.3	93.8	18.2	30.2	82.2	20	384.4	35750	544.1	394.6	65.3	2405	107586	18564	1
KOS-B_408	167.6	241.6	10.5	92.1	15.9	29.5	73.3	32.5	410.9	33407	620.6	305.9	61.2	2048	93820	15873	1
KOS-B_409	184	262	8.2	91.5	16.9	36.4	77.4	27	385.5	35268	598.4	389.8	69	2450	104339	18464	1
KOS-B_41	191.1	268.9	11.8	95.1	18.5	26.7	79.6	14.6	387.2	35343	605.4	344.8	63	2226	108246	17182	1
KOS-B_410	171.2	251	6.3	106.8	19.4	47.9	80.4	44.7	406.2	36335	793.6	334.4	62.6	2156	94507	18776	1
KOS-B_411	179.5	271.4	9.5	91.9	17.8	31.1	80.7	23.3	419.1	35145	709.4	341.9	70.6	2415	117172	18506	1
KOS-B_412	178	280.3	9	101.3	19.2	34.1	86.4	17.9	412	35939	718.8	288.4	67.1	2316	124683	19260	1
KOS-B_413	198.8	274.2	9.4	87.7	17.2	35.7	82.5	15.1	373.1	36461	582.1	388.6	59.9	2468	92722	17663	1
KOS-B_414	162.8	259.9	7.2	88.8	16.7	38.7	75.8	38	435.6	33274	783.5	324.3	73.7	2261	110541	17964	1
KOS-B_415	188.1	276.6	10.9	94.2	18.5	33.1	90	18.5	434.1	35930	704.4	291.6	57.1	2240	113194	18436	1
KOS-B_416	184	255.6	11.1	88.2	15.4	21	73.2	20.2	386.6	33720	529.2	355.5	53.9	2217	107205	16078	1
KOS-B_417	170.9	243.4	7.7	94.9	16.4	39.9	77.6	40.3	418.8	34992	689.9	311.1	55.9	2099	87548	16585	1
KOS-B_418	191.5	257.8	13.1	89.4	16.7	26.9	72.8	26.4	367.4	35083	470.7	412.8	74.3	2614	93558	18155	1
KOS-B_419	173.8	258.3	7.7	82.1	13.7	27.1	78.6	25.6	392.1	34239	578.9	336.3	52.6	2371	86479	15818	1
KOS-B_42	183	242.7	11.4	94.2	14.8	27.7	78.3	31.5	386.9	35421	517	348.5	50.7	2278	91661	16719	1
KOS-B_420	173.5	254.9	7.6	99.9	20.3	39.9	72.1	30.1	377	34459	728.9	335.2	66.3	2051	86887	17012	1
KOS-B_421	191.1	261.9	9.2	98.2	17.4	36.4	87.3	24.8	377.4	36630	604.2	383.9	58.8	2387	105353	19009	1
KOS-B_422	188.9	254.1	9.5	102.2	16.4	32.8	76.5	45.7	384.3	35936	539.8	425.7	74.4	2493	114492	20019	1
KOS-B_423	176.1	251.8	13.8	86.7	10.8	23.7	73.1	34.4	378	33622	452.7	336	65.8	2232	92534	15560	1
KOS-B_424	176	262.3	8.9	98.7	17.2	39.5	87	25.2	430.1	36442	770.2	285.3	60.2	2045	104436	17042	1
KOS-B_425	195.8	278.4	8.4	103.1	18.2	34.9	84.7	27.9	397.1	37102	627.1	351.4	69.1	2348	122358	19313	1
KOS-B_426	193	259.2	11.3	86.4	15.4	33.9	81.6	21.8	375.1	35296	520.6	385.7	65.3	2369	91800	17225	1
KOS-B_427	171.7	238.2	9.8	89.8	16.5	26.5	70.2	23.7	373.3	33663	596	339.9	43.1	2101	77548	14851	1
KOS-B_428	188.2	272.6	9.9	106.3	21.3	39.6	81.7	30.5	405	37151	775.2	339.8	69.1	2346	110052	19502	1
KOS-B_429	178.3	267.7	9.5	87.7	17.2	29.5	77.3	11.1	387.2	34060	617.9	323.2	64.8	2178	99532	16240	1
KOS-B_43	198.1	262.7	13.8	98.7	15.7	28	82.1	34.7	401.6	36799	520.8	379.2	76.3	2427	112295	18586	1
KOS-B_430	197.4	264.2	11	100.9	20.4	36.7	82.9	23.3	378.1	36919	615.5	405.5	66.9	2410	99942	19441	1
KOS-B_431	190.3	270.4	12.4	93.4	18.3	26.2	79.2	12.2	395	34373	620.5	305.7	52.6	1985	105977	16128	1
KOS-B_432	188.5	259.5	10.2	89.5	16	36.5	76.6	31.7	349.9	35478	528.7	435	78.5	2601	85294	18555	1
KOS-B_433	180.7	270.6	9.7	90.4	18.2	34.7	78.1	19.9	397.1	34722	728.4	339	66.9	2227	102055	17018	1
KOS-B_434	185.2	272.1	10.7	98.1	19	38.1	84.2	27.6	403.5	36633	690.3	370.7	79.7	2535	108203	19967	1
KOS-B_435	193.1	275	8.6	93.4	18.4	37.5	85.8	24.4	419.2	37416	716.5	356.2	65.8	2538	107817	18992	1
KOS-B_436	183.1	244	12.2	83.4	13.7	22.6	67.2	20.9	322.6	33863	344.4	425.7	68	2581	77357	16292	1
KOS-B_437	197.2	273.3	9.7	105.6	18.9	46.3	95.1	34.1	424.7	38674	739.8	331.9	62.7	2338	111424	20456	1
KOS-B_438	181.4	244.2	9.5	102.1	15.7	36.1	80.8	45	429.1	35573	632.5	300.2	49.6	1900	99807	16872	1
KOS-B_439	197	260.9	12.6	86.1	16.2	23	72.8	17.5	351.4	34587	442.7	441.9	68.4	2494	96143	17176	1
KOS-B_44	186	272.1	9	105.2	18.8	43.5	89.7	38.7	432.5	37389	754.6	332.3	67.4	2439	123590	21067	1
KOS-B_440	189.3	270.5	7.2	90	17.4	43.3	84.3	27.3	391	36053	649.1	346	59.8	2381	88666	18240	1
KOS-B_441	191.3	279.3	9.5	109.6	21.9	44.3	86.8	35.7	413.8	37865	796.3	365.5	81.3	2534	124887	21925	1
KOS-B_442	182.5	268.9	10.9	89.2	16	29	83.3	15.6	418.6	34854	610.2	299.1	64.3	2234	113986	17137	1
KOS-B_443	190.3	277.9	7.9	86.5	18.3	41.3	84.9	28.1	389.2	36320	687	431.5	72.5	2843	98971	20450	1
KOS-B_444	193.7	265.9	9.3	100.9	20.4	32.2	76.3	29	378.7	36501	630.3	409.4	67.8	2507	104177	19305	1
KOS-B_445	177.4	254.7	8.1	100.3	18.2	28.9	71.9	32.3	397.6	34370	656.2	326.4	58.7	2064	109779	16553	1
KOS-B_446	174.6	260.3	7.9	101.6	18.2	49.4	85.8	36.7	407.1	36071	795.4	313.5	63.4	2112	95839	18747	1
KOS-B_447	196.3	258.9	10.1	100.6	19	34.5	84.1	26.4	398.2	36999	621.2	376.2	58.1	2320	106058	18681	1
KOS-B_448	184.1	261.8	8.9	102.8	20.3	41.8	85.8	33.8	444.5	36869	794	322.7	61.4	2243	111716	19485	1
KOS-B_449	180.4	262.5	11.4	84.6	15.5	22.8	76.7	15.9	382.7	34286	567.8	362.4	56.3	2415	96788	16429	1
KOS-B_45	191.6	272.4	7.9	107.7	18.6	44.2	89.2	36.8	397.9	38009	700.4	366.6	67.6	2456	119636	20965	1
KOS-B_450	194.1	270.2	12.6	98.7	17.8	35.6	87.4	23	406.1	37103	632.3	340.5	69	2344	109489	18693	1
KOS-B_451	182	254.4	10.8	93	17.9	36.2	78.3	34.1	396.8	35342	648.4	395.6	74.1	2490	96798	18717	1
KOS-B_452	171.2	245.2	9.7	85.3	14.2	29	74.2	27.4	393.2	33350	559.6	371.1	57.1	2264	97046	16322	1
KOS-B_453	175.5	237.9	8.3	102.4	18.1	42.6	74.4	46.9	366.4	35552	617.5	413.1	59.8	2395	82822	19318	1
KOS-B_454	183.3	248.7	10.2	93.5	16.8	29.1	73.6	30.6	368.6	34775	518.2	419.9	65.4	2461	96326	18287	1
KOS-B_455	194.3	266	7.8	106.1	19.8	46.6	86.2	34	384.4	38613	667.6	386	66.4	2584	102096	20812	1
KOS-B_456	174.5	246.3	11	94	15.8	30.6	72.9	35	385.3	33791	567.3	366.1	64.7	2238	99018	17362	1
KOS-B_457	182	263.4	8.9	100.9	18	30.7	81.3	19.9	390.3	34903	652.8	294	49.3	1885	106877	16446	1
KOS-B_458	193.1	269.9	10.1	102.4	20.3	31.5	79.3	26.2	394.7	35599	641	364.2	65.9	2222	115266	18744	1
KOS-B_459	183.1	263.7	8.5	103.2	20.3	32	78.6	24.6	387.4	35485	687.2	356.7	58.6	2222	111884	18457	1
KOS-B_46	179.1	258.7	10.8	88.7	17.3	26.5	77	16.4	389.1	33527	622.5	353.7	59.2	2124	99719	16375	1
KOS-B_460	193.1	258.1	10.2	99	17.7	30.8	75.9	27.7	379	35418	573.3	368.6	56.1	2106	101663	17038	1
KOS-B_461	172.3	262.8	9.2	93	16.7	29.8	78.7	26.1	428.5	34678	719.3	312.2	64.6	2202	113937	17169	1
KOS-B_462	188.8	273.4	7.8	109.2	22.4	45.9	87.1	26.7	410.8	37786	878.3	302.4	55.1	2047	102503	18447	1
KOS-B_463	182.8	270.5	10.2	89.9	15.3	32.1	81.4	19.8	402.4	34575	614.3	306.8	61.3	2096	107235	16451	1
KOS-B_464	189.7	249.9	9.2	102.2	20.8	34.4	81.6	29.9	396.8	36680	667.4	406.4	51.7	2409	100197	19343	1
KOS-B_465	198.5	271.3	9.8	102.8	20.9	38.6	84.4	30.3	408.6	37711	670.4	395	74.1	2500	109438	20354	1
KOS-B_466	177.7	245.4	9.9	92	16	29.8	69.7	30.5	359.3	33381	525.7	400.9	66.9	2267	97834	17077	1
KOS-B_467	193.7	262	12.6	92.6	18.3	40	80.3	34.1	378.2	37387	608.8	464.7	79	2940	89426	20968	1
KOS-B_468	180.3	252.9	9.6	100	21	29	69.2	30.6	398.7	34190	654.8	369.9	68.9	2263	108494	18369	1
KOS-B_469	179.7	254.6	9	108.4	20.1	40	76.9	40.8	394.2	36000	712.5	364.4	62.5	2259	106336	19632	1
KOS-B_47	184	259.1	7.9	88.2	15.4	28.5	78.2	21.3	398	34349	580.1	325.1	50.3	2082	99668	15731	1
KOS-B_470	191.6	277.3	8.1	101	20.4	50.5	92.2	27	427.3	37699	845.1	290	61.1	2118	100256	18679	1
KOS-B_471	172.7	264.7	7.4	97.2	18.9	43.9	82.1	29.1	379.7	35345	722.5	358.2	69.3	2408	96154	19502	1
KOS-B_472	201.2	267.2	12.9	108	23	29	83.2	18.3	405.9	36754	672.1	379	62.4	2231	123104	19656	1
KOS-B_473	183.8	274.9	11.5	93.4	19.8	31.1	81.4	15.2	416.3	35623	712	328.5	76.1	2407	111939	18311	1
KOS-B_474	188.6	262.8	9.6	84.4	15.5	29.7	73.4	29.3	352.8	34766	491.2	424.7	66.4	2698	85723	18010	1
KOS-B_475	189.4	274	11.1	98.4	20.2	38.9	87.7	22.8	424.8	36735	778.9	313.2	64.7	2278	108267	18682	1
KOS-B_476	187.3	259.1	9.1	102.4	21.3	34.9	75.6	22.5	368.4	35506	669.8	380.6	58.4	2197	98349	18126	1
KOS-B_477	175.8	253.9	10.1	93.5	15.8	33.9	80.1	40	414.5	34858	636	352.4	64.2	2376	101560	18499	1
KOS-B_478	181.4	263.7	11.8	101.8	19.7	38.2	78.8	41.8	400.7	36329	738.2	390.9	78.2	2596	103376	20444	1
KOS-B_479	185.3	251.7	10.2	95.7	17.5	31.4	78.6	28.3	393.8	34531	595	357.6	53.2	2120	102520	17341	1
KOS-B_48	192	283.9	10.7	101.4	17.6	31.3	87.1	25.5	431.7	37571	693.7	307.8	68.9	2391	126830	19213	1
KOS-B_480	175.1	255.4	9	100.8	17.9	31.4	78	24.3	382.3	34082	619.6	317.8	59.9	1973	107633	17065	1
KOS-B_481	180.5	253.4	9.8	89.9	16.9	26.3	69.8	26.8	389.1	33423	605.2	374	59	2165	102352	16250	1
KOS-B_482	181.4	265.6	10.4	95	17.9	33.2	79.5	21	399.2	35293	704.6	315.6	59.1	2148	102795	16695	1
KOS-B_483	189.3	253.1	14.2	102.6	18.7	35.7	81	35.4	390.6	36755	611.4	395.2	74.2	2536	103897	19963	1
KOS-B_484	171.5	257.6	9.4	95.7	19.4	22.5	66.5	19.8	383.1	31900	641.7	339	58.2	1943	112073	16276	1
KOS-B_485	180.9	259.6	8.5	98.4	22.7	38.3	80.3	15.2	417.2	34879	838.4	317.9	46.4	1934	102594	17041	1
KOS-B_486	184.4	262.1	8.9	98.7	18.1	33.8	81.6	24.3	403.2	36164	658.3	301.7	52.2	2155	98533	17122	1
KOS-B_487	185.8	268.8	9.5	89.2	18.5	30.8	74.2	17.6	381.9	34276	611.3	374.9	73.7	2359	105524	17659	1
KOS-B_488	178.4	256.2	11	100.9	19.3	27.3	79.5	21.7	405.6	35325	667.7	329.3	57.2	2190	109167	17682	1
KOS-B_489	184.5	254.2	9	97.7	19.4	38.5	78.4	31.3	385.6	35482	678	377.1	54.9	2276	91393	18245	1
KOS-B_49	182.7	267.1	8.6	90.7	19.8	36.6	73.6	25.5	386.4	34703	715.1	377.8	69.7	2409	95148	18025	1
KOS-B_490	185.3	280.8	8.1	89.3	17.6	41.6	82.7	33.1	399.1	35674	736.9	358.6	75.5	2543	99397	19092	1
KOS-B_491	194.5	265.4	12.2	89	17.6	29	77	21.3	365.1	35073	555.6	416.2	66.9	2478	95064	17829	1
KOS-B_492	182.3	237.8	8.9	105.5	15.6	37.3	82.9	48.2	397.3	36738	580.7	362	50.5	2238	97609	18430	1
KOS-B_493	195.9	271.9	10.4	104.5	20.3	38.6	86.1	27	410.1	37036	722.8	338.1	64.3	2193	115216	18950	1
KOS-B_494	180.8	258.4	7.3	90.5	18	29.1	70.3	24.1	371	33927	576.9	411.9	64.1	2425	104085	17969	1
KOS-B_495	190.3	247.6	10	95.9	14.9	31.6	79.3	37.4	393.2	35594	509.5	369.3	53.2	2185	95450	17355	1
KOS-B_496	183.8	263.9	9.9	100.6	19.6	37	79.8	33.1	408.1	35813	725.3	343.1	61.2	2300	106070	18919	1
KOS-B_497	186.5	272.4	9.9	93	17.3	38.8	88.1	25.7	412.8	36511	673.9	340.3	63.2	2469	104104	19079	1
KOS-B_498	196.6	272	11.8	98.9	17.7	27.8	80.8	26.7	403.5	36204	584	343.3	58.5	2330	115074	18473	1
KOS-B_499	176.8	249.3	6.3	110.9	21.3	46.3	79.5	41.5	391.3	35985	775.7	374.8	61.1	2151	107460	19678	1
KOS-B_5	173	252.7	8.2	97.4	16.8	25.8	75.6	20.4	405.6	33934	616.6	297.6	46	1928	114006	15934	1
KOS-B_50	180.2	257.5	6.6	90	16.5	36.4	71.6	34.6	351.1	35165	585.5	449.1	67.4	2654	87432	18465	1
KOS-B_500	178.1	254.8	7.2	108.7	20.1	44.2	86.1	34.1	424.3	36747	792.6	261.4	48.6	1900	98047	17721	1
KOS-B_501	180.7	235.2	7.3	92.6	15.8	38.9	78.5	39.4	388.7	35279	591.9	379.7	50.3	2238	82996	16972	1
KOS-B_502	176.1	268.2	8	103	21.4	48.2	78.8	38.4	434.7	34783	898.1	282.8	70.4	1912	108314	18290	1
KOS-B_503	179.6	255.3	9.9	87.4	14.1	28.5	76.2	27.3	353	34840	458.6	441	73.1	2738	99260	18888	1
KOS-B_504	179.6	278.1	8.8	103.4	22.8	54.5	87.2	29.8	396.8	37013	903.3	348.1	79.4	2438	97414	20842	1
KOS-B_505	178.5	268.2	11.6	86.4	12.6	23.8	81	29.7	431.9	34895	594.5	291.2	64.8	2362	113026	16695	1
KOS-B_506	174.5	263	7.1	97.7	16.8	32.2	77.8	24	379.8	34399	648.6	324	47.9	2095	108256	17093	1
KOS-B_507	179	259.1	8.7	104.7	20.2	38.7	77.4	36.7	387.3	35854	705.8	367.7	71.2	2372	103611	19629	1
KOS-B_508	181.1	244.8	6.9	98.5	19.2	41.3	73.1	38.9	377.7	35263	637.4	395.9	64	2324	88667	18346	1
KOS-B_509	170	247.8	6.5	109.4	20.4	42	75.9	39.4	399.1	34866	755.1	317.7	57.2	1920	102175	18234	1
KOS-B_51	190.3	260.9	13	98.6	16.6	30.3	80.5	33.3	407.8	36324	595.1	328.5	55.4	2235	96449	17543	1
KOS-B_510	184.5	267.4	10.1	88.6	14.4	33.4	85.2	33.8	389.1	35533	566.8	408.4	75	2703	108989	19898	1
KOS-B_511	196.5	265.8	10.9	92.5	17.6	36.9	86.6	25.1	400.7	37255	577.4	433	79.4	2745	111949	20375	1
KOS-B_512	173.1	244.9	8	102.2	18.8	34.9	70.8	35.4	389.3	33586	672.3	329.8	57.6	1854	100184	16515	1
KOS-B_513	170.9	243.6	8.6	96.9	15.3	29.7	75.1	31.5	404.8	33915	655.6	267	37.2	1737	93810	14461	1
KOS-B_514	177.4	249.3	9.4	100.3	16.9	26.7	73	35.3	408.2	33987	623.7	308.3	53.2	1893	106992	16099	1
KOS-B_515	187.2	255.5	9.9	88.9	13.5	33.7	78.3	41.9	387	35265	503.2	410	71.1	2530	97394	18437	1
KOS-B_516	182.6	249	11.9	99.9	20.2	33.4	76.4	28.4	391.9	35522	650.9	373.9	66.8	2329	95264	18419	1
KOS-B_517	194.9	253.3	14.1	100.6	16.9	29	78.4	35.3	392.6	36849	540.7	374.4	58.7	2429	99123	18419	1
KOS-B_518	189.2	272.1	8.8	101.9	18.3	39.3	86.2	39	417.8	37044	710.5	363.2	67.6	2509	119738	20629	1
KOS-B_519	165.5	249.1	8.1	100.4	21.3	33.3	75.5	27.9	419.6	34399	780.8	340	66.2	2195	106246	18155	1
KOS-B_52	176.4	251.1	9.6	95.3	16	34.1	74.2	36.3	374.7	34751	562.6	384.2	72.1	2395	95837	18333	1
KOS-B_520	184.8	271.2	8.3	90.1	20.3	31.5	70.3	20.6	362.2	34444	631.5	442.4	76.8	2718	106788	19616	1
KOS-B_521	194.1	259.8	8.5	109.7	23	48.9	85.4	31.8	405	38207	816.8	369.9	57.8	2227	99361	19732	1
KOS-B_522	187.4	273.9	9.7	103.2	17.6	41.9	92.9	28.8	421.3	37624	737.1	281.5	60.9	2221	112398	19007	1
KOS-B_523	178.3	250.2	13.6	86.8	16.6	21.9	68.5	24.3	378.5	32751	538.8	370.9	65.9	2250	90923	16209	1
KOS-B_524	201.5	271.1	10.7	103.2	20.7	39.8	89.1	30.1	416.8	38920	712.9	372.6	68.5	2586	106703	20359	1
KOS-B_525	208.1	278.7	11.3	110.6	23.5	43.6	92.7	31.6	443.7	39510	806.8	354.9	74.2	2442	122337	21590	1
KOS-B_526	178.4	257.6	5.7	102.7	23.7	35.8	72.6	19.6	394	33680	794.4	326.6	46.6	1824	106446	16789	1
KOS-B_527	189.2	254.8	9.3	95	19.7	38.5	77.4	18.1	354.2	35466	610.4	406.3	55.4	2275	86260	17722	1
KOS-B_528	186.5	255	10.8	88.9	17.3	27	72	28.4	393.6	34285	560.3	419.3	68.4	2499	107598	18190	1
KOS-B_529	189	277	12.4	87.5	16.2	33.5	85.7	21	406.7	35670	642.2	329.5	76.4	2427	103892	17851	1
KOS-B_53	172.8	255.7	10.2	89.4	15.5	25.9	75.2	15.3	396.7	34199	655	265.5	41.7	1926	88596	13750	1
KOS-B_530	158.2	236.1	5	100.5	19.5	35.8	67.2	41.3	399.2	32755	773.3	325.1	47.5	1883	91896	16287	1
KOS-B_531	193.1	261.6	5.9	109.3	19.6	42.8	81.4	39.3	386.8	37164	692.9	341.7	49.6	2068	100628	18379	1
KOS-B_532	189.4	262.5	9.5	100.5	21.7	39.5	82.1	30.6	421.2	36399	755.1	380.6	62.1	2426	110241	20124	1
KOS-B_533	173.5	261.9	7.1	88.7	17.9	34.6	72.9	14.7	347.3	33083	622.9	348.8	58.3	2146	88436	16202	1
KOS-B_534	191.5	274.6	10.1	109.3	21.4	39.6	85.6	25.3	382.3	36771	688.2	357.1	68.6	2275	115647	20459	1
KOS-B_535	178.9	242	11.2	106.7	17	27.8	75.4	37.6	382.8	35758	566.8	363.7	55	2272	107571	18301	1
KOS-B_536	185.9	258.2	8.9	91.9	16.2	29	74.4	24.9	373.4	34636	547.1	354.5	54.6	2206	95609	16312	1
KOS-B_537	183.7	260.4	8.8	103.4	17.9	42.8	88.2	29.4	405.3	37332	732.7	304.1	59.6	2094	97404	17785	1
KOS-B_538	178	262.3	8	97.6	15.4	44	86.2	45.9	410.4	37427	716.2	378.5	65.9	2658	102715	20260	1
KOS-B_539	188.3	257.9	8.6	100.2	17.7	39.3	85.3	26.5	378.4	35494	605.6	363.5	54.2	2078	103859	18330	1
KOS-B_54	190	261.9	10.1	94.6	16.6	38.4	84.5	39.5	415.1	36363	616.3	381	67.1	2479	101741	19578	1
KOS-B_540	181.6	263.9	9.4	97	17.6	27.5	77.4	23.5	391.4	34347	622.2	323.3	54.7	2045	106504	16678	1
KOS-B_541	164.7	234	6	95.2	18.6	36.3	62.4	43.4	362.4	33038	613	423.4	68.1	2393	86814	18075	1
KOS-B_542	177.2	268	11	99.2	17.6	29.5	85	16.7	404	34805	663.5	286.7	57.6	2003	113181	17336	1
KOS-B_543	170.7	254.2	5.8	97.7	16.9	38.3	75.5	32	388.6	34315	684.3	299.2	48.1	1923	92315	16040	1
KOS-B_544	183.6	253.1	14.9	88.7	15	28.4	77.5	24.2	398.2	34940	541.8	366.7	72.5	2364	98358	17143	1
KOS-B_545	178.8	253.5	10.5	90.5	14.6	33.3	77.1	34.4	400.9	35107	600.7	358.9	64.5	2347	96120	17388	1
KOS-B_546	192	248.1	13.2	108.8	21.2	40	80.4	42.1	394	37628	632.5	417	76.5	2589	97917	21227	1
KOS-B_547	190.9	249.6	8.6	100.8	20.7	37.8	75.2	35.9	379.4	35574	621.9	403.3	52.6	2334	91702	19068	1
KOS-B_548	174.5	256	8.6	93.3	15.8	29.4	77.1	26.4	381.9	33942	567.2	360.2	57.5	2261	107423	17662	1
KOS-B_549	185.1	251.4	11.5	97.3	17.3	33.4	77.7	37	404.5	36178	598.1	383.8	66.3	2490	99551	18908	1
KOS-B_55	189.7	259.8	8.5	89.5	17.9	34.2	71.4	24.9	361.6	34742	593.7	405.8	58	2358	89387	17073	1
KOS-B_550	189.7	247.7	9.6	95.8	15.9	30.2	71.4	36.8	356	35109	490.2	414.7	65.4	2336	93000	17295	1
KOS-B_551	184.2	261	9.8	89.8	16.2	28.8	79.3	21.3	384.8	34830	575.6	347.6	55.8	2299	98015	16825	1
KOS-B_552	195.4	269.6	10.7	115	23	46.8	91.3	26.5	444	38709	876.2	266.8	58.2	1903	115489	18807	1
KOS-B_553	180.7	233.8	13	113.5	19.2	28.7	76.8	43.5	417.7	35960	652.4	317.2	53.4	1884	102017	17234	1
KOS-B_554	199.9	276.5	12.1	106.1	23	32.8	78.2	18.1	384.9	36054	719.5	370.3	64.2	2169	118672	18913	1
KOS-B_555	195.6	270.4	9.3	99	21.6	37.5	78.4	21.8	364.1	35695	628.7	426.6	70.3	2444	105034	19859	1
KOS-B_556	178	255	8.3	87.8	17.9	20.5	66.6	14	370.6	32357	542.8	353.3	47.4	2089	98597	15311	1
KOS-B_557	197.8	278.3	12.1	94.7	18	27.4	87.4	13.5	400.2	36923	564.2	392.2	76.5	2582	120963	19756	1
KOS-B_558	183	242.6	6.7	99.7	19.8	35.8	65.9	40	370	34132	608.9	390.4	53.7	2109	86184	17226	1
KOS-B_559	176.2	251.6	10.2	97.5	17.6	29.5	73.1	24.6	380.4	34544	619.9	317.1	57.1	2082	93843	16130	1
KOS-B_56	179.7	243.6	10.4	100.7	17.4	36.5	74.2	41.6	371	35092	594.9	395.4	59.7	2328	92693	18682	1
KOS-B_560	178.1	256.3	7.9	86.7	14.7	34.4	76.8	30.2	366.1	34253	558.5	391.2	64.5	2394	90449	17180	1
KOS-B_561	181.7	272.8	11.5	95.3	17.2	35.7	81.2	26.7	393.1	35452	665.3	362.2	80.6	2429	112304	19057	1
KOS-B_562	179.5	245.7	7.1	102.9	19.4	38.7	74	33.8	364.4	35895	653.2	402.9	55.7	2323	91391	18467	1
KOS-B_563	194.9	267.5	7.3	101.4	20.6	42.1	79.7	33.7	378.1	36586	655.8	404.6	67.8	2456	101809	20097	1
KOS-B_564	167.4	242.5	9.4	101.1	17.5	34.8	77.1	28.6	409.9	34516	726.9	248	50.7	1715	90521	14961	1
KOS-B_565	179.8	269.9	7.5	97.6	22.5	40.4	79.3	20.2	415.1	34572	822.7	327.1	63.4	2129	111917	18339	1
KOS-B_566	178.8	258.4	10.4	94.4	17	32.4	73.7	35.7	395.7	34068	634.1	377.9	74.7	2294	109627	18113	1
KOS-B_567	195.9	272.6	12.7	91.9	17.1	27.3	78.1	20.8	401.7	36472	572.9	382.5	75.9	2548	111029	18292	1
KOS-B_568	183	274	8.4	98.2	21.8	40.2	80.5	18.9	403.6	35643	787.6	343.9	66.2	2241	104303	18650	1
KOS-B_569	182.6	262.7	7.6	99.8	21.6	41.7	76.4	32.7	397.2	35492	746.2	379.7	65.1	2349	98490	19417	1
KOS-B_57	175.4	241.9	8.7	89.3	14.9	26.8	69.8	43.1	396.5	32851	563.5	354.1	50.7	2151	93205	16155	1
KOS-B_570	168.9	233.9	9.6	103.2	16.7	28.3	70.9	39.2	393.9	33438	605.1	305	40.6	1748	92672	15512	1
KOS-B_571	191.3	266.2	11.9	96.7	18.8	28.7	74.5	32.1	384	35706	586.7	430.1	76.5	2692	113206	20087	1
KOS-B_572	182.7	264.7	7.7	93.5	19.2	35.4	79.7	16.7	367.2	35067	681.5	358.8	49	2208	88936	17012	1
KOS-B_573	179.8	268.2	11.4	95.2	18.8	29.1	81.1	19	424.9	35048	701.5	327.6	66.6	2274	117862	18222	1
KOS-B_574	200.5	271.6	12.6	101.1	18.4	34.6	86.6	29.2	400.5	37506	626.3	378.8	69.1	2453	111086	19802	1
KOS-B_575	189.9	262.4	12.4	111.2	20.5	34.7	79.9	31.5	405.8	37042	716.8	340	68.5	2155	117078	18997	1
KOS-B_576	184.3	280.7	9.2	99.6	19.5	35.8	88.7	12.3	431.2	36807	762	283	65.5	2184	121261	18367	1
KOS-B_577	187.4	264.8	11.1	97.6	19.9	31.7	82.7	16.7	411.7	35677	702.2	325.2	57.3	2171	110377	17683	1
KOS-B_578	198.2	285.2	9.8	91.8	19.7	40.8	84.4	24	377.8	36458	669.6	427.4	74.5	2731	105373	20760	1
KOS-B_579	173.4	247.3	10.6	107	17.2	36.2	81.5	41.1	414.8	36115	696.5	307	53.8	2105	102976	18218	1
KOS-B_58	178.9	254.1	6.2	103.2	18.2	41.2	84.7	34.4	413.7	36659	740.7	294.3	46.6	2030	94354	17243	1
KOS-B_580	189.6	263.3	9.9	98.4	18.8	44	88.2	26	409.1	36611	701.3	343.5	61	2218	102181	18937	1
KOS-B_581	180.5	263.6	11.6	97.9	18.5	34.3	80	25.8	416.3	36107	706.1	316.4	71.5	2285	103414	17725	1
KOS-B_582	188.7	272	9.5	95.9	19.1	44.9	84.8	27.8	375.9	36537	701.1	387.4	76.1	2539	97745	19861	1
KOS-B_583	200.5	262.4	13	94.6	16.9	24.1	76.1	22.4	377.3	36086	485.8	392.2	62.1	2387	100933	17561	1
KOS-B_584	178.4	244.5	8.6	103	18.9	33.2	71.7	32.3	370.9	33856	624.4	349.3	46.2	1895	97103	16616	1
KOS-B_585	172.9	247.3	8.6	87.8	18.6	33.5	64.5	25.3	364	32658	627.2	376.8	66.9	2149	80870	15688	1
KOS-B_586	189.5	258.2	11.9	81.4	13.4	22.4	74.7	22.6	360.9	33769	450.9	422.3	61	2499	100361	16878	1
KOS-B_587	192.9	286.2	10.8	91.1	17.5	27.7	85.2	11.9	416.3	36096	675.8	335	68.3	2326	121366	17585	1
KOS-B_588	190	257.3	12.6	94.5	19.3	24.2	73.1	20.1	373.7	35244	561.2	407.5	72.8	2505	103164	18011	1
KOS-B_589	177.3	264.7	7.6	95.1	19.6	41.8	80.4	30.3	402.3	35647	743.1	375.8	72.5	2476	99923	19421	1
KOS-B_59	185.5	252	10.8	98.6	17.9	37.8	80.4	33.5	395.6	35517	637.9	368.2	62.9	2251	103247	18521	1
KOS-B_590	189	265.2	9.3	101.5	21.6	35.2	80.7	25.4	409.4	36959	697.4	381.3	70	2486	106773	19681	1
KOS-B_591	171.2	252.4	8.2	98.5	18.3	41.4	77.3	32	407.7	34343	717.8	307	62.3	1949	95997	17230	1
KOS-B_592	192.2	253.5	11.8	106.6	20.2	30	77.4	25.4	394	35777	625.7	325.7	44.3	1940	102596	17069	1
KOS-B_593	192.6	257.6	11.5	93.7	19.9	34.7	69.6	41.8	368.7	35381	560	490	90.3	2870	93649	21011	1
KOS-B_594	184.1	265.5	9.5	91.3	18.4	29.3	77.1	25.8	420.9	35185	701.9	378.5	64.5	2392	111689	17967	1
KOS-B_595	193.9	284.9	13.5	94	17	34.4	89.2	30.9	425.6	36911	658.1	374	80	2720	122148	21055	1
KOS-B_596	175.4	240.4	10.1	81.9	12.8	29.9	69.1	31.8	354.6	32478	471.7	405.6	60	2267	85304	15849	1
KOS-B_597	179.6	256.3	10	82.4	13.2	27.3	72.3	24.3	360.2	34211	459.6	410.5	69.6	2621	94872	17397	1
KOS-B_598	187.6	262.7	10.6	86.4	14.3	34.4	78.8	28.2	358	35415	516.3	400.3	71.4	2547	86955	17579	1
KOS-B_599	184.4	244.1	12	101.7	17.6	35	78.4	35.6	380.5	36914	571.1	401.7	74.1	2484	92082	18840	1
KOS-B_6	183.2	274	13.4	82.9	14.3	30.4	90.8	15.8	410.3	35603	586.7	337.2	69.2	2625	106198	18578	1
KOS-B_60	180	269.6	11.8	89.3	16.9	35.6	82.6	28.2	407.2	35521	661.7	352.5	81.5	2552	97859	18801	1
KOS-B_600	185.9	253.5	12.2	103	17.9	29.6	75.5	33.6	381.5	34820	562.9	392.7	66.8	2176	110189	18546	1
KOS-B_601	168.3	246.4	9.3	100.9	18.3	38.2	80.1	24.6	391.7	34760	702.4	299.5	52.7	1997	96262	16989	1
KOS-B_602	162.9	240.1	7	98.4	17.7	46.1	78.5	44.2	409.9	34905	758.8	363.4	67.6	2262	94195	18685	1
KOS-B_603	193.8	261	13.5	87.9	14.5	24.5	78.9	15.2	358.5	36044	449.2	393.7	68.4	2542	94864	16994	1
KOS-B_604	175	248.9	6.1	104.6	21.8	42.4	73.3	32.8	386.1	34963	756.2	378.5	66.5	2107	100453	18259	1
KOS-B_605	190.1	260.3	11.3	102.4	19.8	30.5	75	28.3	381.5	35711	582.6	375.6	69.5	2339	106208	18679	1
KOS-B_606	177.1	248.8	8	110.1	23	42.8	75.9	37.2	411.8	35632	777.2	351.2	63.7	2133	107925	19452	1
KOS-B_607	177.2	249.6	12.6	84.9	14.2	29.1	71.8	23.8	357.8	32958	472.2	357.9	66.6	2222	84216	15845	1
KOS-B_608	175.8	260.2	8.9	104.9	20.9	33.7	79.9	27.8	417	34976	741.7	293.3	54.2	2079	112837	18330	1
KOS-B_609	173.5	254.6	6.3	94.7	17.6	42.6	74.1	37.7	389.8	34208	690.6	339.8	67.8	2125	91389	17353	1
KOS-B_61	199.3	287.7	12.4	104.2	19.4	35.6	90.9	21.1	409.9	37525	709.9	333.1	69	2312	126553	19809	1
KOS-B_610	182.8	259.4	10	93.6	16.2	36.5	82.9	32	398.2	36102	621.1	350.8	63	2400	92719	18177	1
KOS-B_611	177.4	254.3	12.1	96	16.9	31	78.3	38.1	412.1	35224	633.1	357.2	72.5	2391	99138	18354	1
KOS-B_612	177.9	260.1	6.5	100.2	21.1	34.5	76.1	22.8	401.9	35605	765	328	52.2	2155	99400	17152	1
KOS-B_613	176.7	255.2	7.2	98.7	19.8	43.1	77.3	29.2	379	35813	744.3	352	58.5	2247	84793	17683	1
KOS-B_614	184.1	263.4	10.9	97.8	19.7	35.1	84.4	18.3	397	36109	725.8	340.9	58.5	2254	100732	17996	1
KOS-B_615	192	262.4	10.4	107.2	19.7	36.6	83.8	31.4	411.2	37172	708.9	327.7	53.2	2126	107970	18492	1
KOS-B_616	177.6	260.9	10.1	100.4	18.4	27.9	76.8	20.5	405.7	35317	657.2	307.4	58.7	2111	110061	16898	1
KOS-B_617	188.3	273.4	12.6	94.3	17.6	39.3	84	29.7	403.7	36490	690.5	389.1	82	2603	110712	20050	1
KOS-B_618	186.6	255.2	6.8	98.7	18.8	42.1	80.7	38.6	386.6	36552	669.4	408.8	63.7	2466	94469	19407	1
KOS-B_619	175.7	273.4	9.8	95.6	18.7	35.8	80.4	27.5	412.6	35280	741	320.9	71.1	2406	108037	18979	1
KOS-B_62	191.8	259.2	10	104	18.4	38.3	84.3	34.4	413.5	37658	701.9	338.9	54.2	2206	100583	18113	1
KOS-B_620	189.3	255.1	10.8	109.2	20	38	85.4	40.7	437.1	38217	756.2	377.1	56.6	2434	116627	20589	1
KOS-B_621	195.2	259.1	12	104.5	18.9	37	82.4	41.3	411.9	37984	657.4	397.3	70.8	2556	107282	20174	1
KOS-B_622	200.6	251.5	11.5	103.7	18.8	38.7	84	36.4	406.9	37138	614.3	360.4	55.6	2150	99164	18420	1
KOS-B_623	185.1	252.7	9.2	87.3	17.7	28	73	23.9	374.8	33614	532.2	391.1	56.9	2373	94550	17325	1
KOS-B_624	188.7	261.9	11.1	91.5	16.7	38.5	84.8	32.9	413.4	36033	675.7	349.7	67	2387	98985	18329	1
KOS-B_625	193.3	265.1	8.5	95.6	19	43.5	83.6	30.2	378.5	36209	654.5	389.5	59.8	2423	94694	19281	1
KOS-B_626	173.1	262.2	8.4	96.6	19.6	40.9	81	32.3	413.1	35593	802.1	352.4	66.5	2394	99914	18935	1
KOS-B_627	180	271.1	7	104.3	20.2	45.5	88	31.5	448.1	36049	868.1	256.4	56.2	1894	116455	18195	1
KOS-B_628	175.2	251.6	5.9	98.1	20.3	39.1	71.7	40.6	400.8	34600	770.6	386	57.4	2250	94990	18323	1
KOS-B_629	193.3	271.4	11.6	92.9	17.6	25.5	79.2	18.3	413.4	35507	611	347.3	65.6	2289	119276	17333	1
KOS-B_63	184.8	266.8	9.4	97.6	19.4	32.2	74.2	29.2	404.6	35057	690.5	349.6	65.5	2242	108799	17880	1
KOS-B_630	189.9	252.8	7.9	106.7	19.9	37.8	82.8	29.9	397.1	37153	639.1	345.1	56	2145	98802	18437	1
KOS-B_631	188.7	262.2	10.5	96	17.9	35.9	84.6	29.2	422.8	36125	649.2	359.4	62.9	2387	113589	19300	1
KOS-B_632	183.9	259.6	5.8	104.5	18.8	42.3	82.7	46.5	423.5	37554	711.6	376.3	68.1	2516	110139	20289	1
KOS-B_633	167.7	267	7.9	93	20.5	36.5	77.8	7.4	395.9	33224	774.6	258.6	55.2	1823	94581	15549	1
KOS-B_634	180.4	260.4	6.5	90.9	17.4	40.3	78.2	32.8	366	34392	622.3	408.4	65.6	2403	92257	18699	1
KOS-B_635	198.1	277.6	11.3	99.1	19	36.8	88.5	28.5	428.7	37599	679.5	370.8	72.7	2547	120709	20644	1
KOS-B_636	188.8	256.7	8.1	96	17.7	35.2	77.5	31.3	368.7	35805	611.2	416.8	59.9	2452	100221	18645	1
KOS-B_637	182.2	260.4	11.3	93.3	17.1	37.8	82.2	34	410.3	35677	682	357.4	69.5	2441	101532	18792	1
KOS-B_638	181.5	252.3	8.5	98.7	19.4	40.6	77.3	31.7	373.3	35736	693.3	396.1	64.5	2314	89891	18286	1
KOS-B_639	178.9	262.1	6.7	100.8	16.4	36.7	85.4	26.4	418.5	36240	714.3	273.4	50.8	1945	110151	16611	1
KOS-B_64	188.3	279.4	9.8	94.7	20.2	34.6	83.9	23.4	426.8	36059	770.1	348.6	69.4	2458	117919	19274	1
KOS-B_640	179.9	273.6	9.3	97.5	18.9	43.3	84.6	22.2	412.5	35746	842.2	259.2	53.4	1854	91411	16170	1
KOS-B_641	169.1	256	8.2	94.3	16.8	29	74.7	24.4	397.9	33657	644.4	312.3	54	2084	105694	16462	1
KOS-B_642	186.5	271.6	7.8	100.7	21.4	43.3	81.2	20.8	386.9	35349	757.5	358.3	65.2	2050	104913	18415	1
KOS-B_643	176.8	265.1	12.7	97.1	19.2	24	72.4	20	402.3	32444	610.1	289.6	64.4	1936	116177	16765	1
KOS-B_644	189.8	258.3	9.6	98.4	19.7	36.9	75.8	37.5	388.2	36354	680	408.3	63	2524	94174	19264	1
KOS-B_645	201.1	276.1	11.9	101	17.4	41.9	91.4	36.3	414.4	37993	651.6	357.4	74	2466	113204	20411	1
KOS-B_646	171.9	227.6	10.1	96.7	14.4	25.8	74.2	35.8	403.9	33388	530.2	326.1	36.5	1849	98464	15489	1
KOS-B_647	189.4	258.3	9.5	98.8	18	35.1	80.3	35.6	402.5	36121	652.4	369.3	64.6	2300	103043	18525	1
KOS-B_648	184.3	230.2	7.4	101	17	38	74.3	45.6	367.1	34926	532.9	400.8	47.4	2112	85039	17434	1
KOS-B_649	188.1	266.6	10.2	98.3	16.8	35.7	84.4	25.1	412.8	36087	660.8	277.7	56.6	2025	106463	16877	1
KOS-B_65	181.6	269.9	8.1	89.5	17.5	38.8	80.7	22	376.3	35672	682.7	391.6	67.5	2516	95563	18347	1
KOS-B_650	176.2	249.1	7.8	100.8	19.7	32.1	72.6	27.2	381.2	33854	656.6	322.8	47	1889	92632	16307	1
KOS-B_651	182.2	272	5.2	104.9	21.2	46.5	84	31.2	402.9	36123	813.2	343.4	61.2	2211	115317	19882	1
KOS-B_652	176.6	255.8	9.6	96.2	17.6	30.4	75.7	26.5	387.9	34627	645	342	59.3	2189	99544	17025	1
KOS-B_653	186.7	262.1	10.6	96	18.7	23.7	68.5	28.4	368	34106	559.2	447.5	70.2	2502	117046	18954	1
KOS-B_654	190	268.1	11.1	90	15	33	81	29.5	385.4	34952	559	363.4	63.6	2320	101552	17878	1
KOS-B_655	179.9	274	11.6	87.5	17.6	29.8	78.8	19.1	417.8	34519	733.3	337.7	66.7	2339	110475	17390	1
KOS-B_656	175.6	261	9.7	80.6	14.5	24.1	71.4	26.2	394.4	32753	549.6	358.3	69.3	2378	99596	16384	1
KOS-B_657	170.9	238.7	7.5	103.1	20.3	35.4	68.9	30.1	374.4	34401	672.8	355.1	54	2017	88525	16703	1
KOS-B_658	185.9	253	7	103.7	19.4	40.2	77.3	29.6	380.8	36511	658.7	364	56.8	2153	95727	17734	1
KOS-B_659	181.7	266.2	8.7	101.8	21	42.6	83.6	36.6	420.5	35168	775.7	355.7	72.6	2227	113063	20221	1
KOS-B_66	183.1	258.6	11	102.8	19.1	32.7	74.9	37.2	408.1	35663	675.7	360.9	68.2	2318	111062	18776	1
KOS-B_660	201.3	283.3	12.6	93.7	17.3	33.6	86.5	27	403.2	37404	636.2	385.7	78.1	2649	113060	19627	1
KOS-B_661	177.9	260.3	9.5	94.8	21.2	31.2	72.3	20.4	407.8	34283	747	338.5	63.3	2184	102724	16988	1
KOS-B_662	180.4	264.2	7.1	102.1	20.6	42.5	80.1	32.9	420.8	35729	811.1	296.5	59	2049	103461	17791	1
KOS-B_663	174.1	245.5	6.6	102.9	16.9	39.7	80.2	35.3	401.2	35394	655.3	296	51.5	1913	96946	16844	1
KOS-B_664	189.1	277.1	9.5	113.2	19.7	47.4	96.6	32.6	406.6	38671	781.5	331.7	67.1	2323	122803	21281	1
KOS-B_665	169.1	253.8	8.6	95.5	16	32.6	79.8	34.6	442	34864	748.8	279.8	58.5	2072	111035	16641	1
KOS-B_666	178.9	252	9.2	96.4	19.3	28.8	73.4	27.4	410	33939	663.1	336.5	54	2084	106685	16874	1
KOS-B_667	162.7	250.1	8.6	90.7	16.6	31.1	74.6	27.4	431.9	32953	752.3	259.8	51.6	1830	98968	14874	1
KOS-B_668	184.4	266.5	11.5	90	15.5	25.7	77	27	400	35318	576.4	385.6	76.3	2620	117187	18707	1
KOS-B_669	182.3	259.8	9.3	104.7	19.6	34	83.9	30.2	428.7	36045	725.6	310.7	58.7	2085	115295	18289	1
KOS-B_67	175.5	252.2	4.9	95.2	15.7	43.1	79	44.2	392.7	35519	681.1	350	57.3	2275	90812	17691	1
KOS-B_670	175.1	251.7	7.8	94	18.1	35.3	74.1	27.2	373.5	34466	672.6	351.3	50.6	2170	84963	16518	1
KOS-B_671	190.4	294.6	10.4	87.2	17	33.4	85.4	18.4	390.6	36180	641.1	409.9	84	2886	121052	20800	1
KOS-B_672	184	269	9	99.7	19.2	33.5	78.5	25.2	405	35315	674.7	359.6	73	2286	122764	19023	1
KOS-B_673	174.4	240.2	11.2	92.2	18.3	25.8	64	21.8	355.2	31805	582.7	354.2	55.4	1860	87397	14582	1
KOS-B_674	190.7	253	9.5	95.6	19.6	29.3	72.3	25.9	378.8	33959	563.1	413.2	62.5	2208	107285	17930	1
KOS-B_675	187.9	276.3	9.6	94.3	17.9	33.7	81.3	21.9	404.8	34940	685.8	278.6	63.7	1971	100755	16334	1
KOS-B_676	183.9	254.9	9.4	98.6	18.8	40.5	80.8	37.8	372.5	35796	639.3	420.2	70.6	2511	93628	19900	1
KOS-B_677	187.5	260.4	9.7	108.2	21.1	38	77.5	34.1	389.4	36075	705	384.9	65	2238	112850	19616	1
KOS-B_678	192.2	271.1	9	92.7	17.7	34.9	84.9	23.7	415.8	37157	687.1	361.1	62.7	2511	108247	18678	1
KOS-B_679	192	246.8	11.6	103.2	19.2	39.5	79.4	47	389.9	37358	594.3	468.8	69.1	2800	101157	21818	1
KOS-B_68	195.5	268.4	11.5	84.3	14.1	31.1	80.1	29.6	371	35748	485.8	428.4	74.1	2764	99316	18814	1
KOS-B_680	186.8	263.8	11	97.5	18.3	35.6	80.5	31.7	407.7	36433	637.5	372.5	73.1	2521	106685	19471	1
KOS-B_681	184.9	271.4	11.3	87.8	16.9	31.6	80.9	15.5	385.3	35597	598.3	386.7	79.5	2626	106845	18685	1
KOS-B_682	190.3	249.5	11.1	94.5	18.1	34.3	82.5	27.8	397.4	35348	601.8	389.1	53.2	2238	96026	18112	1
KOS-B_683	172.6	252.7	8.8	92.1	14.8	36.2	73.6	37.3	376.2	34696	591	359.6	71.8	2333	87051	17111	1
KOS-B_684	180.3	262.1	9	85.6	15.8	32.9	75.3	27	397.5	33889	623.2	360.1	71.3	2251	98885	16761	1
KOS-B_685	186	257.9	11.2	93.1	18.6	31.7	73.8	22.7	383.3	34727	618.5	361.7	59.4	2209	91750	16771	1
KOS-B_686	193.4	261.9	11	98.4	18.5	38.2	85.3	31	408.1	37533	650.6	388.3	62.4	2524	101484	19597	1
KOS-B_687	171	259.9	9.2	88.1	18	26	71	18.8	383.3	33132	645.9	365.8	65	2337	101875	17019	1
KOS-B_688	199.6	263.8	10.9	103.5	20.4	35.6	78.5	35.1	368.6	36964	558.2	443.1	73.9	2677	105152	21176	1
KOS-B_689	181.5	256.1	6.9	104.7	21.9	46.1	79.8	36.7	397.9	36631	767.4	387.9	65.8	2421	99774	20129	1
KOS-B_69	179.4	253.8	9.8	96.6	17.7	36.7	83.1	26.7	428.2	34412	710.7	284.5	52.6	1819	105918	16506	1
KOS-B_690	179.8	267.8	10.2	80.2	15.5	29	79.4	7.5	378	33450	577.8	349.4	58.6	2264	96289	16066	1
KOS-B_691	181.8	253.5	9.5	111.3	21	47	89.2	43.1	430.3	38272	819.5	345.6	66.9	2363	104947	20783	1
KOS-B_692	195.6	251.4	8.9	103.7	18.3	39.4	84.3	36.1	387.2	37008	610.7	374.1	46.4	2200	96246	18463	1
KOS-B_693	178.1	252.5	10.8	83.2	12.5	22.2	74.6	27.4	395.7	32955	499.9	306.9	47.2	2076	93515	14772	1
KOS-B_694	169.7	251.2	5.8	101.1	19.2	35.4	68.3	36.3	373.3	33837	658.8	366	64.4	2176	99612	17993	1
KOS-B_695	180.9	247.6	10.9	95.5	17.3	29.4	74.8	33.8	387.5	34100	558	377.5	64.1	2229	98018	17825	1
KOS-B_696	183.2	264.2	8.1	97.3	20.3	36.5	86.9	17.9	426.6	35455	775.1	280.4	43.4	1940	101844	16966	1
KOS-B_697	174	234.8	9.9	92	16.7	27.9	66.5	36.1	361.7	33019	538.7	422.3	52.5	2299	88866	17008	1
KOS-B_698	168.9	249.5	9.8	92.5	17.2	33.1	71.8	30	403.5	33517	678.4	315.4	71.2	2032	94201	15841	1
KOS-B_699	173.4	251.8	8.3	92.9	18.2	31.5	72.3	28.5	393.4	34256	652.4	379.6	67.7	2365	101597	17751	1
KOS-B_7	198.2	265.1	10.6	99.4	19.1	34.2	79.1	27.4	357.6	37073	540.3	453.2	75.3	2717	104564	20364	1
KOS-B_70	175.8	248.1	7	94.5	16.3	42.6	74.6	45.8	377.3	35528	659.7	387.2	66.1	2426	81002	18103	1
KOS-B_700	190.7	271.6	9.1	105.5	22	34.7	78.2	21.4	392.7	36734	728.9	353.7	68	2210	107739	18399	1
KOS-B_701	195.6	275.9	11.6	97.9	17.6	28.5	82.6	30.1	411	36826	608.6	378.4	70.5	2627	123169	20179	1
KOS-B_702	182.1	259	12.7	91.3	15.2	28	81.2	29.7	424.2	35031	627.5	301.9	60.6	2197	104130	16512	1
KOS-B_703	186.1	260.7	11.9	92.4	17.8	39.2	84.8	28.2	393.9	35926	653.6	376.6	76	2469	94957	18888	1
KOS-B_704	200.6	284.9	10.6	102.4	20.4	35.9	81.8	25.9	389.2	37140	674.4	384.8	80.1	2463	117442	19963	1
KOS-B_705	193.5	278.2	11.6	100.1	20	40.7	91	22.3	420.2	37168	755.4	297.6	65.5	2184	102707	18626	1
KOS-B_706	184.2	277.7	9.8	101.6	21.3	43.6	87.4	23.4	425.6	36362	846.5	273.9	67.1	2056	103888	18292	1
KOS-B_707	192.7	256.3	8	108.8	21.6	41.5	83.6	32.8	388.6	37370	702.5	389.3	52.3	2292	102517	19868	1
KOS-B_708	190.2	273.8	10.5	95.3	20.7	24.2	75.7	4	370.1	34373	574.1	351.8	64.3	2242	113588	17660	1
KOS-B_709	181.2	272.1	8.8	99.6	19.1	36	82.7	27.2	405.4	36268	726.9	352.8	65.7	2403	110633	19151	1
KOS-B_71	178.6	252.1	8.7	92.9	18.1	36.2	71.6	32.2	386.5	33520	647.9	356.6	65.1	2081	92872	16933	1
KOS-B_710	164.2	248.9	6.6	105.5	21.8	37.8	79.4	26	428.2	34477	860.8	256	49.3	1742	101740	16347	1
KOS-B_711	191.6	259.1	7	100.2	22.1	44.7	78.2	33.8	393.6	36417	730.5	390.6	62.5	2397	95373	19420	1
KOS-B_712	185.1	255.3	13.6	104	19.3	37.5	81.3	40.2	407.7	36653	676.6	359.4	72.7	2431	99427	19640	1
KOS-B_713	182	269.6	7.3	100.2	21.8	37.2	77.5	26.7	414.8	34855	787.2	358.3	62.6	2231	120175	19302	1
KOS-B_714	187.8	285.4	9.1	97.3	19.9	43.1	89.6	24.1	407.5	37017	759.3	374.5	80.3	2699	122837	21553	1
KOS-B_715	180.9	250.4	8.6	99.9	18.1	41.3	75.8	35.9	379.4	35043	652	342.2	59.9	2089	90903	17524	1
KOS-B_716	180.6	256.2	8.6	101.8	18.4	35.2	78.6	35.3	423.6	36383	669.9	335.9	65.3	2302	108536	18570	1
KOS-B_717	185.4	267.9	11.3	93.1	16.8	21	75.5	9.5	386.4	33781	564	302.6	57.7	1905	112204	15064	1
KOS-B_718	174.4	258	7.8	83.9	14.6	33.2	79.2	16.6	389	33462	580.9	280.7	49.8	1953	84105	14578	1
KOS-B_719	188.6	263.5	9.7	98.9	19	37	81.2	39.4	414.2	36782	695.7	417.1	68.5	2661	112394	20781	1
KOS-B_72	179.2	259.4	9.6	96.4	16.9	34.4	82.8	32.3	404.4	36381	681.5	350.2	57.5	2515	103110	18893	1
KOS-B_720	184.6	265.6	11.3	105.8	21.2	40.1	84.6	37.1	427.8	36922	768.7	359.3	76.1	2484	115796	21121	1
KOS-B_721	202.4	282.6	10.7	89.4	17.6	38.4	87.3	26.1	393.3	37942	612.2	426.5	82.4	2871	100138	20458	1
KOS-B_722	174.9	256	7.8	89.1	17.8	39.8	79.5	28	395.4	34722	703.3	375.1	64.2	2358	90743	17808	1
KOS-B_723	200.2	277	12.1	103	21.7	42.7	88.6	36.8	428	39024	738.6	436.4	81.9	2968	118698	23321	1
KOS-B_724	201.5	291.8	12.8	106.8	20.4	29.7	89.4	12.7	411.7	37119	701.9	286.5	63.5	2027	126868	18423	1
KOS-B_725	187.6	253.6	11.8	95.3	18.5	27	75.2	31.8	400.6	36031	567.3	433.5	76.5	2705	106581	19724	1
KOS-B_726	190.5	265.6	12.3	95.1	18.1	36	86.6	24.2	390.5	36212	608.8	372.9	68.7	2449	99033	19148	1
KOS-B_727	178.9	257.2	8.9	93.4	17.6	21.2	71.8	12	363.9	34002	544.8	359.9	56.8	2216	105884	16105	1
KOS-B_728	184.3	266.4	8.4	100.6	19.6	37.1	79.2	29.8	414.9	35732	726	308.4	61.2	2112	104772	17963	1
KOS-B_729	180.7	253.9	9.8	107.7	19.2	38.9	78.8	42.3	408.1	36644	686.7	365.7	69.6	2379	110958	20035	1
KOS-B_73	188.3	260.8	11.5	96.4	17.2	28.9	72.9	33.8	390.3	35167	589	360.6	66.4	2314	102155	17598	1
KOS-B_730	185.7	258.2	15.6	99.9	19	21.9	72.1	34.5	407.3	34502	590.9	368.6	73.1	2377	113035	18784	1
KOS-B_731	180.7	275.1	10.8	84.4	17.7	29.4	81.9	8.4	386.9	33823	656.7	341.6	68	2326	104928	17103	1
KOS-B_732	179.8	268.9	7	107.7	22.8	40.1	79.4	27.4	422.1	36047	870.3	336.6	63.4	2122	122371	19201	1
KOS-B_733	179.7	250.4	11.9	85.8	14.2	27.6	72.8	33.7	384.8	33504	491	366.2	67.2	2366	91011	16969	1
KOS-B_734	184.3	261.1	11.4	98.7	18.5	32.4	78.2	29	400	34814	625.7	331.1	66.8	2172	106573	18117	1
KOS-B_735	206.7	288.2	10.6	97	20.3	45.2	89.6	33.6	399.2	38029	697.1	434.4	80.5	2832	111392	22517	1
KOS-B_736	188.5	260.9	7.2	96	18	45.5	84.7	38.4	397	38032	670.3	442.8	77.1	2854	100834	21151	1
KOS-B_737	197.1	276	11.2	85.1	17.5	29.7	78.1	15.4	358.9	35254	561.2	407.8	71.8	2581	95052	17918	1
KOS-B_738	179.8	256.9	10.9	108.4	19.7	42.8	83.1	28.9	404.1	36926	800.9	277.4	60.7	1920	96610	17037	1
KOS-B_739	185.6	251.9	10.7	109.4	20.1	31.8	81.2	33.9	421.9	36334	717.7	300.4	46.2	1968	108698	17554	1
KOS-B_74	171.5	258.4	9	93.3	16.6	32.7	78.1	30	385	34937	660	358.8	65.5	2447	96782	18243	1
KOS-B_740	185.2	268.5	10.7	94.5	16.7	36.8	85.6	31	428.8	36138	681.9	316.4	69.5	2303	107797	18390	1
KOS-B_741	186.6	271.7	8	98.4	19.9	36.3	79.8	24.3	374.8	35392	709.7	360.1	55.7	2228	100017	18057	1
KOS-B_742	182.2	271.1	10.6	97.7	19.1	31.2	77.9	19.4	422.8	34623	746.1	271.9	53.7	1820	106981	15912	1
KOS-B_743	176.7	271.2	8.4	97.5	20.1	40	79.1	25.9	397.2	35886	784.8	353.8	69.6	2433	102838	19001	1
KOS-B_744	174.9	266.2	12.3	77.8	15	28	76.8	17.4	383.1	33587	598.4	381.2	69.2	2604	92205	17255	1
KOS-B_745	184.5	261	8	102.4	19.6	38.4	80.7	35.8	412.1	37373	748	373.2	66.7	2518	108947	19585	1
KOS-B_746	167.9	255.5	7.3	101.6	19.4	38.2	80.8	23.6	416.2	34633	790.2	252.1	51.4	1798	100618	16177	1
KOS-B_747	182.2	265.2	9.1	90.7	15.7	27.8	79.3	22.4	400.3	34749	591.5	313.1	60.4	2178	103235	16415	1
KOS-B_748	190.3	270.2	9.3	93.5	18.3	36.8	81.1	24.5	407.8	35229	668.9	367	71.2	2196	110262	18185	1
KOS-B_749	186.8	258.5	8.3	103.9	19.8	43.2	80.6	40.1	376.6	36531	660.7	432.8	74.1	2577	106950	21279	1
KOS-B_75	174.7	258.7	8.9	94.7	17.8	32.3	72	32.4	395.9	34283	691.7	323.9	61.8	2162	93724	16636	1
KOS-B_750	186.8	273.7	11	93.7	19.2	34.1	79.3	17.9	402.4	35676	721.4	347.5	69.3	2292	105494	17690	1
KOS-B_751	179.3	261.5	8.2	93.6	16.6	35.8	79.5	36.4	396	35233	659	389.7	67.2	2506	107898	19197	1
KOS-B_752	181.8	256.4	6.5	97.9	21.9	43.4	79.3	24.3	394.8	34831	750.6	371.2	58.2	2127	97741	18462	1
KOS-B_753	194.8	285.5	10.9	97.1	19.5	29.1	86.8	6.6	406.7	35811	695.4	286.5	53.8	2049	119169	17181	1
KOS-B_754	180.6	282.2	11.6	103	19.7	39.5	89.7	20.2	431	36633	812.1	240.7	63.8	2037	108014	18044	1
KOS-B_755	176.2	258	8.8	103.4	21.4	42.8	80.6	27.6	396.6	35866	794	331.6	67.2	2155	96430	18340	1
KOS-B_756	182.7	247	10.3	91	16	32.9	67.6	32.6	344.2	33881	489.3	411.8	65.6	2340	83543	17105	1
KOS-B_757	195.4	257.2	12.3	89	14.2	28	78.5	29.2	388.3	36529	490.7	396.3	65.1	2598	99370	17690	1
KOS-B_758	190.9	259.9	9.6	96.7	18.7	38.4	80.8	32.4	395.6	36255	653	416.6	61.2	2483	104413	19687	1
KOS-B_759	186.9	267	11.2	88.2	17.9	26.6	76.1	6	354.4	33835	545.7	361	65.7	2174	95901	16062	1
KOS-B_76	175.7	256.8	6.6	89	17.1	43.1	77.6	36.6	398.8	33774	700.6	358.1	68.2	2165	91741	17527	1
KOS-B_760	186.2	271.9	9.7	97.2	20	38.7	85.9	17.5	415.7	35700	777.9	276.1	52.3	1983	101159	16965	1
KOS-B_761	168.2	259.8	8.3	92.7	19.3	40	78.1	30.6	410.3	33936	792	333.6	66.1	2246	97494	18165	1
KOS-B_762	189	270.5	10	96.2	17.3	31.2	84	20.4	391.1	36276	606.3	345	64.8	2346	107130	18120	1
KOS-B_763	188.7	256	7.9	113.3	20.7	42	86	34.5	409.2	37588	753.6	314.3	41.8	1984	106052	18539	1
KOS-B_764	174.1	261.6	6.8	105.7	21.7	39.3	76.1	21.1	387.7	34856	793.9	284.7	51.1	1809	98087	16558	1
KOS-B_765	178.1	249.3	13.6	93.8	17.1	24.5	68	31.5	370.1	33366	558.3	379.9	70.7	2265	94087	16994	1
KOS-B_766	184.3	258.1	12.9	101.8	19.2	27.7	76.7	41.4	438.7	35775	651	365.6	76.4	2542	122096	20303	1
KOS-B_767	173.7	259.1	6.5	95.7	18.2	34.5	73.1	22.9	391.6	33606	690.3	303.7	53.2	1843	100181	15566	1
KOS-B_768	183.7	260.2	11.6	92.2	16.9	30.6	76.2	34.4	376.4	34208	553.5	401.2	70	2520	102475	19148	1
KOS-B_769	198	283.7	10.3	113.5	23.7	45.2	90	21.2	404.2	39458	822.6	313.2	70.8	2330	109646	20271	1
KOS-B_77	181.5	251.8	9.4	95.8	15.5	32	79.2	32.1	397.8	36253	617.4	347.9	59.1	2335	99480	17128	1
KOS-B_770	188.4	247.2	11.5	98.3	16.6	23.9	73.7	30	382.4	35661	511.8	356.2	51.6	2203	92176	16239	1
KOS-B_771	180.5	265.9	12	92.2	18.4	36.3	82.6	26.6	394.9	35422	673.7	395.5	71.7	2617	101218	20031	1
KOS-B_772	174.5	233.5	8.4	90.9	15.8	35	72.4	35.9	359.6	33749	505.1	393.7	56	2279	77211	16951	1
KOS-B_773	185.5	262.2	7.9	90.8	16.7	39.3	77.1	27.5	351.8	35558	558	418.1	76.7	2539	88814	18517	1
KOS-B_774	170.8	238.1	9.8	91	15	29.7	72	34.4	396	33294	585.3	344.1	59.2	2059	94026	15868	1
KOS-B_775	185.5	256.7	11.1	96.6	17.8	30.7	76.7	29.2	378.4	34524	540.4	392	67.5	2326	104833	18741	1
KOS-B_776	180.8	257.4	5.5	100.5	20.1	43.8	80.9	37.8	385.1	36298	716	424.7	70.5	2582	104027	20695	1
KOS-B_777	180.4	263.4	9.8	86	15.6	27.9	75.2	13.1	369	34038	586.2	346.9	59.2	2139	91062	15269	1
KOS-B_778	179.1	243.8	6.1	109.5	19.8	39	76.6	41.8	423.8	36923	747.5	306.3	45	2022	98616	17366	1
KOS-B_779	186.7	265.9	11.7	90.2	15.6	24.8	74.6	25.2	391.3	34210	533	375.7	69.8	2383	116423	17918	1
KOS-B_78	185.8	252.8	10.2	100.4	19.3	30.7	73.8	29.5	384.3	34778	641.6	358.3	54.3	2092	100962	17162	1
KOS-B_780	201.2	270.8	10.8	96.4	19	38	83.1	28.1	395.7	36792	609.6	401.7	72.7	2492	108117	19742	1
KOS-B_781	180	260.7	9.4	97.7	18.2	36.4	79	30.5	396.9	36018	671.8	363.1	65.2	2369	97064	18355	1
KOS-B_782	173.2	256.9	6.3	94.9	18.8	34	73.3	24.6	391.7	33309	643.3	345.1	62.5	2100	109098	17501	1
KOS-B_783	182.7	251.1	12	98.7	16.7	27.9	75.6	31.8	405.8	34643	576.7	324.2	62.9	2059	105933	16920	1
KOS-B_784	182.9	255.7	10.2	95.5	17	34.1	78.9	36.2	398.2	34594	645.8	356.7	57.9	2200	101309	17993	1
KOS-B_785	182.6	251.3	9	89.2	15	26.8	75.7	18.6	367.9	33038	516.8	327.9	46.3	1870	96893	14658	1
KOS-B_786	175.2	260.1	8.2	87.7	15.5	25	76.5	23.6	400	33059	594.3	341.1	56.4	2142	109073	16493	1
KOS-B_787	169.6	231.2	9	89.7	16.9	25.6	60.6	27.5	349.5	32213	533	393.3	54.2	2093	80377	14756	1
KOS-B_788	194.1	255.8	13.6	101.4	19.3	27.2	81.2	34.8	430.5	36648	638.9	367.4	63.8	2375	109834	18979	1
KOS-B_789	198.9	286.3	8.9	94.2	18.2	33.7	90.2	15.7	407.2	37030	665.1	346	60.9	2450	120393	19233	1
KOS-B_79	179.7	259	9.5	92.8	16.1	27.5	76.5	27	392.8	34118	579.4	368.7	61.6	2276	112820	17728	1
KOS-B_790	170.4	258.4	6.6	103.8	19.8	42.4	79.7	25.4	404.3	35613	811.8	255.2	53.2	1839	92774	16168	1
KOS-B_791	183.2	257.1	8.3	91	19.2	33.8	70.9	19.8	340.1	34230	583.4	444	66	2445	90166	17986	1
KOS-B_792	179.7	258.2	11.6	91.5	18.5	34.8	78.4	28.2	402.3	33922	676	368.8	66.7	2262	100369	18305	1
KOS-B_793	193	276.8	9.1	95.6	19.1	44.8	85.8	29.6	394.1	37598	724.7	392	78.7	2671	102204	20336	1
KOS-B_794	185.2	262.6	10.1	93.7	14.5	25.6	83.1	26.8	392.3	35446	508.2	363.4	62.2	2434	115625	18315	1
KOS-B_795	187.4	284.5	7.5	97.5	19.7	37.7	83.5	21.6	400.8	36130	721	343.6	72	2387	115529	19289	1
KOS-B_796	186.1	262.7	12.5	99.9	16.8	29.2	80.1	33.9	389.6	36381	589.1	382.6	74.8	2502	106815	19050	1
KOS-B_797	197.7	276	8.4	95	17.6	39.8	86.4	25.5	377.4	36853	606.5	398.4	72.3	2511	106583	19683	1
KOS-B_798	181.5	253.7	8.6	94.5	16.6	29.2	74.5	33.6	389.4	34348	553.2	384	61.6	2321	106568	18118	1
KOS-B_799	186.5	259.6	7.1	113.2	19.9	38.7	88.4	32.4	421.2	37555	714.2	272.2	44	1979	113169	18580	1
KOS-B_8	178.1	263.8	10.6	87.4	14.8	28	74.2	27	380	33873	561.2	341.3	66.8	2239	90679	16157	1
KOS-B_80	182.7	270.6	6.5	97.2	18.2	43	90.5	32.3	431.9	36312	765.5	319.3	61.7	2308	114457	19689	1
KOS-B_800	177.1	251.8	7.5	108	20.4	42.9	77.9	39.6	404	36380	768.4	312.4	60.3	2111	95813	18192	1
KOS-B_801	192	277.7	11.1	88.9	15.7	29.7	84.3	15.9	393.9	34574	552.1	324.2	65.1	2222	115535	17525	1
KOS-B_802	182.7	270.1	8.6	93.8	17.7	34.3	80.4	27.3	400.4	35791	690	346.3	62.9	2431	105074	18387	1
KOS-B_803	187.2	260.7	7.6	100.2	18.8	38.8	78.2	27.9	381	36369	669.5	379.3	59.4	2315	104122	18321	1
KOS-B_804	177.4	236.9	7.7	106.5	20.3	39.5	69.9	52.6	399.3	35754	691.8	380.9	57.7	2313	89797	18859	1
KOS-B_805	188.4	278.3	6.3	97.7	17.8	47.2	92	39.4	401.7	38704	728.3	429.9	76.7	2985	110586	22476	1
KOS-B_806	182.1	246.5	9.6	103.4	18.4	35.9	77	42.9	405.9	35990	671.4	358.3	62.1	2224	99030	18210	1
KOS-B_807	183.2	262.3	8.7	101.7	19.7	33.6	81.3	25.7	397.9	34920	699.9	318.7	53.9	1943	103473	17344	1
KOS-B_808	181	277.9	11.5	90.6	17.7	32	82	23.8	412.1	35505	691.8	377.8	77.1	2706	119339	20019	1
KOS-B_809	193.8	255.2	11.6	94.2	15.8	37.2	81.3	41.5	400.1	36926	524.3	415.8	77.1	2692	99398	20053	1
KOS-B_81	177.1	252	8.8	106.1	21	38.7	76	34.7	393.4	35260	739.3	338.6	62.5	2058	95903	18155	1
KOS-B_810	190.4	260.9	8.3	104.2	19.9	40.1	82	35.9	406.2	36911	713.4	376.3	62.3	2296	107625	19292	1
KOS-B_811	166.4	239	11.5	97.5	18.8	21.2	63.3	23.3	380	32445	575.5	343.6	59.5	2063	100852	16203	1
KOS-B_812	175.4	265.8	9.6	97.8	17.1	30.9	79.8	16.2	390.7	34504	649.5	293.9	58.3	1997	112560	16513	1
KOS-B_813	176	254.4	10.7	87.2	16.6	32.5	78.3	30.4	392.3	34173	594.3	396.3	70.3	2553	95185	18801	1
KOS-B_814	190.4	275.8	10.9	104.9	19.1	34.1	91.2	22.9	440.7	37488	770.6	275.2	55.3	2126	123517	18504	1
KOS-B_815	167.7	258.3	6.7	92.7	17.1	29.8	72.4	22.2	405.6	32852	702.3	276.8	53.9	1765	101016	14740	1
KOS-B_816	189.8	270.6	6.9	95.1	19.6	38.7	82.3	23.4	391.4	34790	681.8	365	59.6	2168	109869	18328	1
KOS-B_817	171.1	247.7	10.4	106.3	21.5	35.6	73.3	32.5	412.1	33528	754.6	273.1	55.1	1755	101295	17053	1
KOS-B_818	174.2	257.5	8.1	97.7	18.5	27.7	71.1	17.8	363.3	32591	645.1	288.3	44.7	1632	93261	14243	1
KOS-B_819	177.7	266.6	9.7	79.7	14	30.7	72.9	31.3	381.2	33531	584.3	378.9	70.9	2546	91748	17076	1
KOS-B_82	174.7	255.4	11.1	93	18	31.3	73.6	32.2	403.4	33960	661.8	352.3	64.8	2344	101619	17980	1
KOS-B_820	173.8	246.5	8.6	87.7	15.7	29.9	67.8	31.1	351.2	33402	502.7	438.8	67.5	2514	89149	17740	1
KOS-B_821	188.7	268.7	8.5	100.2	19.4	37.3	85.8	23.8	417.2	36128	710	309.3	59.7	2078	110566	17964	1
KOS-B_822	184	243.9	11.2	113.1	21.5	37.3	73.8	44.9	405.8	35801	714.7	324.3	59.4	1952	97886	18251	1
KOS-B_823	182.7	280.3	11.7	94.6	18.1	33.6	90.8	16	442.1	35513	752	274.9	67.2	2148	121956	18300	1
KOS-B_824	192.5	252.7	11.4	100.8	18.3	40.3	77.4	45.8	393.1	37301	615.2	442.2	73.7	2705	98908	20889	1
KOS-B_825	175.1	234	6.9	98.5	17.1	34	67.6	40.3	355.6	33900	580.6	389.5	53.7	2052	82413	16269	1
KOS-B_826	175.3	247.6	9.5	89.3	17.8	34.1	70.6	26.5	354	33411	609.5	424.5	67.5	2330	85569	17376	1
KOS-B_827	184.9	276.4	10.5	86.7	15.9	34.7	79.3	19.9	377.8	34742	588.7	351.3	78.6	2419	100615	17863	1
KOS-B_828	177.2	263.3	9.6	99.3	18.5	37.2	85.9	20.1	409	35752	744.9	252.8	51.6	1924	92817	16307	1
KOS-B_829	186.8	258.3	9	111.4	21.7	45.2	86.8	39.9	418.3	37974	803.1	336.1	62.9	2279	104057	20150	1
KOS-B_83	188.6	273.5	10.6	85	18.2	35.2	82.7	23.7	416.3	35349	666.9	409.6	81.2	2701	110843	19904	1
KOS-B_830	173.7	260.8	7.6	102.7	19.5	40.6	76.8	32.2	418.8	35331	791.2	278.1	62.9	1940	101228	16984	1
KOS-B_831	175.3	270.4	7	97.4	20.3	40.6	77.2	20.7	393.3	35097	785	328.2	69.7	2183	104299	17713	1
KOS-B_832	196.8	272.9	10.1	101.1	19.4	32.1	86	17.2	404.1	36842	611.6	325.6	58.9	2201	111875	18233	1
KOS-B_833	176.5	265.1	9.5	82.1	14.6	25.7	72.1	24.2	372.5	33511	511.3	384.4	68.4	2612	98582	17565	1
KOS-B_834	195.6	271.6	8.7	87.4	17.2	31.8	77.9	23.9	366.4	34820	537.9	414.9	63	2532	102083	18532	1
KOS-B_835	200.3	259.2	10.8	106.2	23	41.2	79.7	31.1	402.9	37588	707.3	412.4	69.8	2415	105852	20233	1
KOS-B_836	178.6	262.7	6.9	93.3	15.6	36.2	81.1	24.6	383.7	35798	621	338.6	59.2	2318	99484	17367	1
KOS-B_837	178.6	247.2	8	90.7	17.1	26.5	66.7	34.8	371	32912	529	400.8	59	2316	95613	17401	1
KOS-B_838	197.5	266.8	12.7	73.5	12.2	24.8	76.2	15.8	327.1	35089	346.2	490.1	74.7	2993	87367	17878	1
KOS-B_839	176.7	253.7	10.1	95.1	19	24.6	66.7	27.7	382.6	33157	629.5	361.9	62.2	2116	99065	16365	1
KOS-B_84	165	245.3	5.9	85.9	15.1	29.9	63.6	25.6	332.3	31839	522	379.5	57.7	2128	78506	15165	1
KOS-B_840	180.9	259.9	7.9	93.2	19.5	40.4	76.4	26.9	364.9	35038	657.5	402.4	70.9	2457	88148	18633	1
KOS-B_841	191.4	257.5	8.1	98.9	20.3	44.8	76.6	35.9	352.5	35464	643	433.5	64.6	2403	89061	19737	1
KOS-B_842	184.7	270.3	5.4	103	20.5	39	81.7	32.5	424.4	35846	754.9	357.8	62.7	2239	125655	19759	1
KOS-B_843	180.8	259.6	7.1	98.5	18.3	48.6	89.2	42	435.4	36257	766.3	318.8	62.1	2164	95801	19018	1
KOS-B_844	187.2	258.5	8.7	106.6	17.7	30.7	77.5	39.8	398	36079	597.6	347.1	68.6	2239	118858	18665	1
KOS-B_845	181.7	260.5	11.8	97	16.3	32.9	77	37.3	401.1	34864	601	376.9	79.8	2357	113415	18953	1
KOS-B_846	171.3	258.3	8.1	85.5	18.5	36.7	71.4	18.1	363	33484	656.1	374.2	75.6	2386	84069	17134	1
KOS-B_847	196.8	279.4	10.4	101.8	19.9	33.3	84.8	20.2	402.4	36099	647.9	340	60.7	2183	119486	19023	1
KOS-B_848	186.8	253.2	12	89.2	14.8	29.3	72.7	24.4	342.3	34498	413.1	397.7	66.7	2419	85063	17129	1
KOS-B_849	191.4	258.9	8.2	93.5	17.5	43	81.4	25	342.5	36161	553.8	410	67	2422	80817	18313	1
KOS-B_85	183.2	257.7	9.8	99.9	18.6	30.4	78.3	25.1	387.2	35871	648.1	359.8	57.7	2270	101592	17711	1
KOS-B_850	179	255.8	6.2	100.2	19.8	43.4	75.4	32.2	359.1	35591	651.2	401	73	2436	94629	19197	1
KOS-B_851	180.4	244.3	9.1	102.2	20.7	28.1	70.4	30.2	385.6	34529	667.2	360.9	41.6	2079	94564	16967	1
KOS-B_852	187.6	259.7	13.4	91.3	18.7	23.3	70.5	24.4	391.8	34627	571.6	393.1	75.2	2510	103458	17807	1
KOS-B_853	189.7	265.9	11.2	86.5	15.2	29.4	81.3	21.6	397.9	35362	561	381.7	65	2515	110154	18016	1
KOS-B_854	170.8	250.6	8	87.5	15.8	27.3	68.3	26.9	387.4	33222	617.3	321.4	55.9	2084	86694	14802	1
KOS-B_855	191.4	269.2	7.5	106.4	24.1	40.1	82.8	20.3	422.2	36923	831.5	339.5	56.2	2068	110280	18545	1
KOS-B_856	192	269.1	10.7	95.2	19.1	33.5	83.9	33.5	427.8	35796	662	382.2	69.6	2545	119099	20292	1
KOS-B_857	181.3	253	10.3	90.1	14.5	35.7	80	32.5	385.7	35901	581.8	362.5	61.6	2444	86981	17421	1
KOS-B_858	180.4	272.2	6.9	104.3	19.4	41.6	85	31.9	432.5	36900	821.4	278.5	57.7	2137	112844	18465	1
KOS-B_859	196.1	270.7	14.4	91.9	16.1	23.4	86.3	22.3	418.4	36657	582.8	359.7	65.9	2572	117069	18729	1
KOS-B_86	188.1	242.5	10.1	99.4	17.3	28.3	68.7	41.4	371.8	34624	502.7	407.3	58.5	2198	91366	17310	1
KOS-B_860	173.5	253.1	6.4	98.5	19.5	37.1	75.6	27.5	406.2	33823	726.5	326.4	52.3	1881	103935	16766	1
KOS-B_861	181.3	250.6	7.8	95.2	16	43	82.5	35.9	381.8	35789	660	348.6	57.5	2174	85035	17273	1
KOS-B_862	180.8	245.8	12.7	93.7	18.1	23.3	64.9	22.1	348.3	33747	508.8	430.8	68.6	2377	95214	17066	1
KOS-B_863	188.7	276.5	8.1	101.3	19.9	40.4	89.6	23.1	407.5	37741	753.9	344.4	64.2	2454	110354	19796	1
KOS-B_864	182.5	250.7	7.2	108	20.6	37.9	78.2	42.6	411.8	36511	692.9	371.5	61.8	2364	110885	19957	1
KOS-B_865	178.1	251	11.6	92.8	14.7	22.9	75.3	32.5	427.7	34462	602.6	285.3	52.5	2089	105875	15622	1
KOS-B_866	178.8	245.5	8.4	94.6	19.1	34.6	66.1	32.6	369.9	33362	644.4	396.6	62.9	2085	90288	16591	1
KOS-B_867	193.6	267.8	12.5	96.2	19.9	30.6	75.8	16.5	366.4	35393	589.6	406.8	74.9	2424	107484	18592	1
KOS-B_868	181.8	272.6	13.1	94.9	19	36	84.9	18.8	394.2	36727	668.7	398.6	86	2789	108471	20838	1
KOS-B_869	180	262.2	3.7	102.9	23.1	48.7	76	30.6	389.6	35962	838.8	364	61.6	2156	91084	18452	1
KOS-B_87	171.2	264.1	7	99.9	20.2	35.2	76.4	33.2	441.2	35309	784.3	317.7	68.5	2348	119802	18864	1
KOS-B_870	177.2	260.6	9.3	94.8	19	32.3	68.9	30.1	377.3	33248	622.3	389.5	73.8	2306	107489	18423	1
KOS-B_871	183.8	254.7	11.1	87	15.2	29.9	74.2	33.1	383.5	33854	513.9	387.2	67.2	2370	93003	17396	1
KOS-B_872	205.2	270.8	13.5	100.5	18.4	31.9	86.3	29.5	412.8	37814	604.4	344.4	60.3	2372	103029	18860	1
KOS-B_873	178.3	267.5	8.6	96.3	18.4	35.6	78.8	22.7	387.9	35063	695.9	342.7	59.9	2234	104308	17820	1
KOS-B_874	174.2	255.2	9.2	96.4	19	39.3	75.5	26.6	391	34454	765.5	308	57	1938	86477	15965	1
KOS-B_875	185.5	258.6	11.4	104	20.1	43.4	87.1	39.6	409.2	37440	705.2	405.1	80.9	2625	104343	21644	1
KOS-B_876	174.3	250.5	8.7	98.1	19	31.4	71.1	29.4	394.8	34424	687.1	342.5	63	2140	100650	16663	1
KOS-B_877	162.5	247.8	8.1	85.5	14	24.9	74.7	25.6	423.4	32444	679.6	251.2	39.9	1829	96373	13670	1
KOS-B_878	196.9	264.5	13	90.5	17.3	24.8	79.9	13.8	392.6	35672	544.2	386.5	70.1	2361	109722	17341	1
KOS-B_879	179.4	256.6	7.9	103.5	20	46.1	79	45.1	409.9	36563	756.7	371.9	71.4	2444	99070	20206	1
KOS-B_88	172.1	268	9.5	97.4	18.6	32.1	79	26.9	433.2	34070	765.5	272.5	63.4	2002	117162	17095	1
KOS-B_880	174	251.1	8.3	95.9	19	35.8	76.1	31.5	392.2	34258	706.4	322.8	52.9	2079	84998	16719	1
KOS-B_881	200.2	267	10.5	103.4	21.2	48.3	88.7	39	403.6	38773	672.9	456.2	79.4	2928	109359	23595	1
KOS-B_882	180.6	255.7	11.7	95.4	18.1	34.8	79.6	36.6	425.8	34670	673.8	336.1	67.9	2208	102456	18189	1
KOS-B_883	177.5	267.7	7.5	93	16.2	39	80.5	31.4	383.7	35789	662.2	360	73.6	2490	99710	18488	1
KOS-B_884	188.2	255.6	11	93.7	16.7	36.2	80.4	37.8	410.1	35286	598.7	363.3	64.3	2368	102697	18790	1
KOS-B_885	171.5	237	5	99.5	19.8	36.8	70.7	34.1	411.6	34595	739.1	318.8	44.6	1874	86116	15543	1
KOS-B_886	177.7	272	5.8	105.2	20.4	42	83.9	21	396.3	35801	778.5	293.2	57.5	1995	112400	18066	1
KOS-B_887	177.8	268.4	7	107.8	21.5	49.5	90.5	34.3	436.2	37015	875.8	315.5	68.6	2188	115351	20449	1
KOS-B_888	185.8	248.3	9	105	18	40.7	77.7	40.4	368.4	36031	627.1	351.8	56.2	2074	86560	17409	1
KOS-B_889	198.8	286.1	10.4	92.6	20	38.3	89.7	17	420.8	37054	725.6	351.3	69.5	2509	112938	19644	1
KOS-B_89	194.2	267.3	8.5	92.3	17.7	37.3	76	39.7	362.4	36484	559.4	471.2	77.8	2910	94930	20662	1
KOS-B_890	181.9	261	7.5	98.5	18.6	37.9	78.1	38.5	406.2	35784	700.5	353.3	61.2	2366	101521	18737	1
KOS-B_891	187	268.4	8.3	92.8	19.8	42.6	81.3	18.7	369.9	35170	685.3	367.6	66.1	2275	92876	18216	1
KOS-B_892	179.8	245.8	7.3	101	17.4	36.3	73.9	39.7	379.1	35977	619.2	352.5	53.4	2270	87922	17343	1
KOS-B_893	179.1	252.1	9.8	90	14.9	25.9	74.8	21.2	381.1	33345	515.5	332.1	58.9	2023	103108	15515	1
KOS-B_894	173.7	267.1	9.9	93.2	17	26.2	77.8	17.4	410.4	34185	660.4	287.1	59.1	2124	112468	16473	1
KOS-B_895	188.6	275.4	10.7	92.8	17.5	27.5	80	17.3	385	35144	622.4	357.3	62.7	2360	112507	17967	1
KOS-B_896	191.2	270	10.9	88.3	14.4	22.5	76.8	19.7	371.4	35305	466.4	400.3	70.9	2581	113187	17906	1
KOS-B_897	198.2	273	9.2	104.8	20	34.9	85.3	22.8	405	37367	676.9	346.8	57.6	2218	117326	18795	1
KOS-B_898	185.6	257.2	10.6	105.2	18.9	33.5	78.2	29.9	397.2	35545	644.7	313.7	55.9	1995	106429	17476	1
KOS-B_899	195.6	268.7	10.5	103.8	19.8	34.5	87.4	23.4	413.3	37115	742.6	310.3	42.4	2059	107997	17703	1
KOS-B_9	176.4	256.9	9	84.6	16.8	33.2	69	31	384.6	33807	601.3	395.4	74.5	2529	89964	17576	1
KOS-B_90	187.4	258.4	9.6	102.6	19.2	27.3	75.5	39.3	417.7	35955	648.2	385.4	56.8	2432	116937	19343	1
KOS-B_900	177.2	251.6	4.7	86.8	14	41.7	78.7	35.8	378.2	34538	570.2	365.1	59.3	2307	88696	17089	1
KOS-B_901	180.5	251.1	10.7	93.3	17.7	25.7	69.5	20.1	353.7	33406	532.6	371.7	58.3	2155	93459	16247	1
KOS-B_902	190	254.4	7.1	110	20.3	42.1	83.3	31.6	375.5	37231	683.7	364.2	48.9	2111	99803	18679	1
KOS-B_903	174.1	270.7	8	96	18.2	32.8	78.7	22.9	398.5	34311	725.6	313	61.7	2132	110260	17553	1
KOS-B_904	169.5	240.7	6.6	95	16	35	68.2	40.5	389.7	32948	608.5	341.3	54.3	1968	95770	16331	1
KOS-B_905	182.3	261	7.3	91	15.8	41.8	80.6	39	378.7	36219	599.8	419.4	70.5	2718	91895	19818	1
KOS-B_906	182.8	266	8.7	99.2	21.4	38.4	77.5	23.7	382.6	35748	719	393.5	73.2	2444	103053	19384	1
KOS-B_907	178.1	263.5	10.8	96.2	19.5	32.5	75.5	31.2	417	34899	741.5	339.3	67.8	2319	104689	18188	1
KOS-B_908	182.9	244.4	9.7	91.8	18	38.5	76.6	35.2	380.1	35062	640.4	401.9	57.2	2422	83430	17989	1
KOS-B_909	183.3	273.6	9	94.2	20.3	33.8	79.7	20.3	429.9	34432	746	316.4	64.3	2140	118529	18096	1
KOS-B_91	178.2	249.7	8.5	96	17.6	34.2	74	26.1	383.4	34176	622.2	334.9	58.2	1991	96248	16079	1
KOS-B_910	197	262.7	11.1	96.1	19.3	36.8	78.3	26.8	362	36556	569.8	433	71.9	2590	91519	19475	1
KOS-B_911	176.1	261.4	11.3	94.4	20.1	28.9	73.3	25.1	405.5	33466	695.5	348.8	72.7	2249	110195	17871	1
KOS-B_912	187.3	260.9	10.6	103.1	19	31.5	80.8	25	412.8	36093	660.5	307.1	60.8	2040	109143	17369	1
KOS-B_913	179.1	264.2	5.6	106	21.9	48.9	81.8	34.3	405.5	36250	863.7	317.9	56.4	2047	96891	18547	1
KOS-B_914	183.5	257.9	7.8	102.2	18.7	48.2	88.8	29.8	405.7	37591	761.7	309.2	49.3	2130	88192	17998	1
KOS-B_915	180.4	256.8	11.6	91.5	17.8	27.6	69.6	36	404.1	33667	623.2	394.8	75.7	2440	111007	18295	1
KOS-B_916	199.6	290.2	10	104	21.9	43	93.5	25.8	423.1	38312	773.2	380.3	80.6	2660	129558	22443	1
KOS-B_917	180	272.8	9.1	108.1	19.5	41.7	89.9	27.9	420.4	36298	800.8	259.8	61.1	1916	115773	18469	1
KOS-B_918	177.4	243.9	7.8	97.9	17.6	29.7	71.2	26.4	366.4	34087	600.2	316.2	37.9	1827	79266	14588	1
KOS-B_919	196.8	252.4	12.4	91.2	15.5	32.1	78.7	38.8	388.9	36956	485.8	446.6	72.3	2786	92800	19476	1
KOS-B_92	199.3	274.3	11.3	84.6	15.7	28.8	81.3	26.8	374.4	35752	472.3	472.3	76.6	2973	111703	20733	1
KOS-B_920	185	269.7	11.2	93.1	19.6	34.6	80.6	16.4	391.7	35286	695.2	335.6	66.5	2267	96511	17442	1
KOS-B_921	186.6	264.5	8.6	93.5	19.6	39.7	80.9	28	388.6	35740	675.7	402.8	75.7	2525	99112	19460	1
KOS-B_922	184.2	240.3	7.8	103.2	18.5	29.6	72.2	36.9	393	35439	568.5	355.1	48.8	2076	93572	16869	1
KOS-B_923	179.4	253.7	9.4	85.1	13.3	29.3	79.3	31	398.2	34799	552.8	363.1	62.2	2407	95940	16837	1
KOS-B_924	182.5	270.3	7.9	91.8	19.1	27.1	76	16	382.3	33727	623	372.2	60.7	2290	113745	17931	1
KOS-B_925	184	262.5	8.2	86.4	17.3	28.3	74.9	10.3	362.4	33929	604.1	351.5	54.5	2155	93746	15519	1
KOS-B_926	186.8	249.1	9.7	88.4	15.5	25	68	24.4	345.9	33715	442.9	415.4	58.4	2312	92001	16227	1
KOS-B_927	181.7	271.3	3.8	104.8	20.4	55.8	87.4	45.7	395.8	37805	791.6	412.3	78.4	2700	105723	22762	1
KOS-B_928	189.5	275.3	10	95	17.9	33.3	79.9	24	389.7	36069	660.7	351	67.4	2381	104270	18213	1
KOS-B_929	183.2	252.5	7	93	16.4	37.9	79.6	40.3	391.1	35029	610.2	387.7	52.8	2326	92462	18261	1
KOS-B_93	180.7	256.9	8.4	93.1	17.8	29	72	23.3	373.5	34202	572.9	372	65.4	2303	102626	17197	1
KOS-B_930	183.4	266.2	10.3	97	19.5	30.9	78.8	17.8	404.6	34662	691.7	325.2	55.9	2084	111930	17339	1
KOS-B_931	191.3	275.5	9.1	103.8	19.8	47	93	26.2	405.6	38679	786.5	337.9	71.1	2440	106952	20105	1
KOS-B_932	186.9	253.1	9.5	115.4	23	41.2	79.9	32.4	407.9	37106	799.4	330.5	54.3	1935	107190	18392	1
KOS-B_933	178.1	264.8	8	104.6	20.7	40.7	80.2	33.7	398.8	35413	774.1	338.3	66	2179	108783	18952	1
KOS-B_934	178.4	263.1	8.4	96.9	17.6	45.7	86.8	25	400.2	37003	756.9	297.6	60.2	2209	87419	17386	1
KOS-B_935	192	257.8	7.8	102.1	19.5	38	79	32.8	387	37326	670.5	377.8	55.3	2407	95856	18805	1
KOS-B_936	194.8	264.7	11.2	104.9	18.7	37.4	82.7	36.2	381.5	37798	614.6	414.5	68	2620	106029	20769	1
KOS-B_937	203	265.5	12.5	98.4	17	39	86.4	29.3	377	37856	563.1	399.6	71.3	2458	96419	19007	1
KOS-B_938	199.1	276.4	15	95.4	21.1	29.9	81.2	10	401	36252	681	346.3	69.6	2303	104518	17856	1
KOS-B_939	193.4	279.6	10.5	95.4	16.6	39.9	91.5	28	430.7	37705	709.7	331.6	70	2419	113181	19120	1
KOS-B_94	186	257.5	9.6	100.1	19.4	36.5	77.7	31.7	383.4	35946	663.7	372.4	64.9	2363	98769	18684	1
KOS-B_940	188.1	269.4	9.8	102.8	19.5	33.2	84.2	29.5	441.8	35719	720.5	307.8	65.1	2066	127262	18646	1
KOS-B_941	170.1	253.7	8	87.9	17.5	32.1	67.1	30.4	386.1	32872	649.5	372.9	67.5	2285	95231	16781	1
KOS-B_942	188.2	260.2	9.7	94.2	19.4	33.9	69.3	39.2	386.4	34694	621.7	430.8	77.8	2585	104185	19569	1
KOS-B_943	190.4	257.8	8.2	98.2	17	35.2	85.8	25.5	385.6	36326	567.1	346.9	55.6	2216	100846	17880	1
KOS-B_944	187.5	261.6	6.4	109.7	22.5	49.9	86.3	29.6	418.4	37221	861.5	314.2	46.9	1909	103816	18439	1
KOS-B_945	170.3	255.3	7.1	95.4	19.9	41	78.8	23.5	403.6	33865	807.7	304.6	56.5	1881	95023	16365	1
KOS-B_946	168.7	265.6	7.1	95.3	19.3	30.7	73.8	12.6	392.5	33721	719.9	277.8	54.4	1991	105013	15983	1
KOS-B_947	180.2	257.9	9.5	98.6	17.3	37	81.3	28.8	393.8	35625	651.7	345.8	63.2	2228	103699	18204	1
KOS-B_948	169.2	257.4	9.8	99.8	19	31.5	74	20.9	411	33655	753.9	226.1	52.5	1683	99237	14931	1
KOS-B_949	180.5	261.8	6.9	93.2	19.4	42.1	79.9	28.9	398.8	35288	733.3	381.3	64.4	2382	98973	18938	1
KOS-B_95	178.4	256.1	8.4	107.6	23.8	45.3	79.9	30.5	420	36331	816.9	341.8	71.2	2207	103771	19637	1
KOS-B_950	169.3	237.3	10.8	90.5	14.4	22.2	68.1	37.5	402.5	32344	566.9	344.4	52.5	1993	98918	15216	1
KOS-B_951	191.7	251.7	10.1	106.5	19.9	41.5	80.7	47.2	405.3	36895	670.5	401.2	71	2366	103225	20068	1
KOS-B_952	195.5	275	10.6	99.1	18.5	36.7	89	20.7	393.8	37485	613.7	381.1	72.5	2517	111621	20066	1
KOS-B_953	175.4	250	10.9	84.6	14.8	29.2	72.7	32.7	390.1	33869	569.2	389	66.8	2497	93099	17276	1
KOS-B_954	182	249.7	12.1	100.7	17.2	28.8	76.2	36.1	414.7	36001	593.6	349.3	64.9	2364	105907	18498	1
KOS-B_955	168.7	241.5	6.2	108.2	20.1	37.1	74.8	33.6	400.1	35654	739.8	284.7	46	1907	89612	16492	1
KOS-B_956	195.4	263.3	12.6	96.6	17.3	30.4	75.7	37.7	388.9	36190	546	421.3	78.6	2626	107070	19610	1
KOS-B_957	180.2	260	9.3	101.1	17.5	36.4	84.3	25.4	392.7	35862	656.2	308.8	53.3	2086	100529	17548	1
KOS-B_958	185.6	264.1	13.6	100.6	19.5	27.8	79.5	20.8	405.8	35652	663.9	344.2	66	2303	116653	18484	1
KOS-B_959	183.8	260	10	89.5	15.5	30	77.4	25.9	387.5	34038	551.4	370.2	62.6	2256	107118	17368	1
KOS-B_96	186.7	259.4	9	86.5	16.7	36.2	75.6	33.2	380.4	34504	578.2	408.7	67.8	2457	88106	18031	1
KOS-B_960	187.5	259.2	5.9	87.5	19.1	40.5	69.4	34.4	342.4	35065	612.3	496.5	76.4	2765	81021	19277	1
KOS-B_961	179.6	251.8	10	94	14.7	40	88.3	40.8	417.2	36122	644.3	363	65.3	2382	99426	18891	1
KOS-B_962	188.8	281.1	11.5	83	16.4	28.5	79.6	14.7	386.7	35069	589.2	375.4	77	2632	105295	18045	1
KOS-B_963	191.8	244.8	9.8	96.3	15.1	26.7	69.3	40.3	378	33911	478.2	364.8	46.7	1969	99283	15801	1
KOS-B_964	178.3	253.9	10.8	93.5	15.6	35.1	77.2	34.3	384.9	34987	606.9	350.5	64.3	2276	90207	17234	1
KOS-B_965	181.2	269.3	11.2	100	19	28.6	80.1	30.4	437.8	35516	733.2	293.4	62.3	2220	116975	18038	1
KOS-B_966	181.4	254.1	10.3	97.6	18.6	36.5	76.2	31.4	380.4	35347	638.1	377.4	69.8	2345	94532	18369	1
KOS-B_967	192	258.8	10.1	108.1	20.5	31.9	77.2	22.8	391.3	36088	681.2	301.3	46.2	1803	103918	16077	1
KOS-B_968	177.9	255.9	5.3	97.1	18	38.5	75.6	29.2	368.4	34279	619.5	359.3	61.4	2135	99613	17756	1
KOS-B_969	173.8	264.8	7.2	92.8	17	45.2	86.7	28.9	417	35127	772.1	300	60.6	2125	100375	17826	1
KOS-B_97	182.4	231.8	8.5	94.1	17.1	26.1	69.6	28.9	377	33541	510.2	366.1	38.1	1881	82151	14795	1
KOS-B_970	185.8	254.7	10.1	94.7	16.3	38.3	80	42.5	397.6	35747	620.4	414.4	70.4	2547	105318	19724	1
KOS-B_971	177.5	262.5	7	102.9	21.8	42.9	77.6	33.4	396	35429	780.9	348.8	64.8	2232	97506	19109	1
KOS-B_972	180.6	247.2	7.1	99.2	19.9	38.8	68.7	42.9	383.7	34282	665.9	392.2	60.9	2177	90464	17812	1
KOS-B_973	170.7	252.6	9.6	99.3	19	43.4	77	25.8	396.4	34291	792.8	249.4	57.8	1680	84255	15133	1
KOS-B_974	167.5	245.3	9.4	100	17.7	27.6	68.9	34.6	385.5	32821	650.7	339.5	53.1	1985	106312	16645	1
KOS-B_975	197.4	295.2	7.8	99.8	18.3	41.1	97	11.4	422.6	38374	767.2	277.3	55.5	2220	124252	18781	1
KOS-B_976	203.1	257.9	14.5	99.9	17.7	28.2	80	36.5	422.1	37070	540.8	430.3	75.1	2639	127368	20545	1
KOS-B_977	184.5	257.6	12	100.1	19.7	33.3	79.5	31.7	425.4	35789	715	359.7	64.3	2299	110022	18994	1
KOS-B_978	179.9	253.3	11.5	96.8	18.8	27	72.6	26.1	384.8	34173	628.6	363.9	56.6	2242	102980	17503	1
KOS-B_979	174.8	259.1	9.8	98.2	19	34.5	83.4	22.6	423.2	35227	740.5	299	54.3	2115	106585	17709	1
KOS-B_98	205.6	278.1	11.1	96.6	18.9	37.4	90	28.8	396	38544	568.4	443.1	81.6	2981	113743	22337	1
KOS-B_980	175.3	245.4	7.5	94.9	14.9	33.2	74.5	36.8	357.4	34431	527.4	393.7	60.2	2337	94518	17650	1
KOS-B_981	190.6	257.7	11.1	93.8	17.3	33.3	82.2	28.4	400.8	35777	577.9	348	65	2312	96503	17796	1
KOS-B_982	160.2	241.2	3.9	96	17.5	41.7	69.9	38.7	378.5	34211	745	343.5	50.7	2116	78602	16319	1
KOS-B_983	193.2	268.6	9.2	99.2	19.6	43.1	83.5	37.7	403.2	37255	713.4	398.8	71.8	2582	103935	20444	1
KOS-B_984	187.2	259.4	8.9	101.2	19	44.1	85.2	34.7	408.3	37465	703.4	331.4	63.8	2384	94267	19103	1
KOS-B_985	173.9	264.3	7.7	91.2	19	34.6	72.8	24.6	397.4	34239	754.9	372.7	67.4	2306	103444	17510	1
KOS-B_986	196.7	261.2	13.5	97.5	19	37.3	80.3	32.5	395.7	36473	622.3	396.4	72.5	2444	97323	19339	1
KOS-B_987	185.1	262.7	11.9	104.7	17.9	27.8	78.5	29.3	390.4	35425	569.9	359.6	69.2	2263	120562	19125	1
KOS-B_988	182.1	255.3	8	113.1	22.2	34.9	77.6	36	415.6	36418	759.5	332.7	54	2050	111035	18708	1
KOS-B_989	175.8	250.8	9.7	95.3	15	36.7	75.8	40.9	375.3	34542	584.4	340.9	68.9	2224	89625	17302	1
KOS-B_99	176.5	249.2	10.3	102.4	16.3	39.4	87.7	31.5	430.8	36316	746.5	240.2	41.2	1764	93685	15888	1
KOS-B_990	174	249.1	8.8	90.2	14.3	29	73.4	28.6	373.9	33301	533.9	361.8	57.3	2112	97869	16262	1
KOS-B_991	183.4	249	10.1	98.2	17.6	32.4	75.3	39	399.3	35711	585.2	394.5	67.1	2497	104098	19111	1
KOS-B_992	182.2	280.8	10.4	94.5	17.7	35.1	87.2	18.2	428.9	36475	763.3	283.4	65.4	2294	113109	17930	1
KOS-B_993	187	268.8	11.1	98.9	19.9	29.6	73.9	25.6	390.4	35221	645.6	392.3	76.7	2424	116480	19072	1
KOS-B_994	175.7	255.2	6.6	101.7	19.3	47.8	80.5	40.7	413.9	36473	791	329.8	63.6	2243	93121	18682	1
KOS-B_995	197.7	273.3	10.9	95.9	19	38.5	85	36.2	387.3	37710	623.3	446.1	75.5	2988	103891	22045	1
KOS-B_996	190.3	266.3	11	91.3	13.4	23.1	73.7	31.8	375.3	35592	429.3	407.2	77.8	2640	113134	18353	1
KOS-B_997	179.3	261.7	6.9	95.6	20	32.9	78.5	13.2	405.2	34830	714.5	292.2	49.1	1927	97269	15809	1
KOS-B_998	179.4	259.1	11.7	94.5	16.3	28.1	74.2	27.7	384.1	33923	573.7	358.1	68.8	2229	109310	17530	1
[truncated: 31,001 more rows]

## Sheet: Synth, Training Data Kos (mix)
SAMPLE	Zr	Sr	U	Rb	Th	Pb	Zn	Cu	Ni	Fe	Mn	Cr	V	Ti	Ca	K	CLUST
KOS-A_1	245.5	353.3	14.5	124	26	40	85	26	198.4	33437	406.7	250	79.3	3009	64001	20031	0
KOS-A_2	227.3	364.2	15.1	125.1	23	43.4	78.8	35.4	198.3	33159	347.3	261.5	86.5	3245	65468	22401	0
KOS-A_3	236.9	388.6	15.8	128.1	23.9	37	81.3	27.8	201.4	33755	377.3	237.9	78.8	2980	64976	21316	0
KOS-A_4	252.9	386.2	17	144.5	25.8	47.4	83	30.4	190.1	34986	365.1	205.6	70.2	3007	61137	21757	0
KOS-A_5	218.7	359.8	13.7	126.6	25.6	43.4	75.8	27.9	197.8	32970	367.5	206.3	78.1	2979	62908	21836	0
KOS-A_6	246.6	375.6	17.1	127.6	24.1	43.1	83.4	33.4	190.1	34087	391.8	231.8	88.4	3294	69507	22160	0
KOS-A_7	229.4	357.7	14.1	114.5	22.8	44.2	81	35.7	204.3	33554	368.6	264.7	92.9	3352	66642	20985	0
KOS-A_8	219.3	355	18.7	126.9	24.7	37.5	78.2	34.5	174.2	30074	317.8	209.3	78.5	2626	80470	20856	0
KOS-A_9	225.5	373.8	14.6	101.7	24.5	34.5	81.4	32.5	195.4	32064	371.6	252.6	73.5	2735	80570	18482	0
KOS-A_10	237.7	406.5	15.9	111.2	24.1	43.6	79.9	27.8	201	32205	342.3	215.6	82.5	2959	81570	20444	0
KOS-A_11	232.1	354.8	21	141.7	25.2	46.7	85.9	29.7	176.3	34689	375.2	198.1	82.3	3101	51866	22644	0
KOS-A_12	234.2	375.6	17.5	139.2	24.2	38.9	80	30.1	201.1	35654	402.9	234.2	80.2	2952	61473	21821	0
KOS-A_13	236.4	370.7	18	138.9	25.1	43	81.4	22.5	200.4	35032	371.5	213	83.5	2985	60357	22430	0
KOS-A_14	228.9	359.3	16.2	128.3	23.5	39.6	81.7	35.1	187.9	32559	361.2	257.6	78.4	3027	73153	22945	0
KOS-A_15	241.2	372.2	17.3	131.2	24.2	46.1	80.5	31.3	184.5	33285	443.4	215.2	82.5	2967	72916	20828	0
KOS-A_16	219.9	344.8	17.9	124.1	23.6	36.9	78.2	34.6	177.1	30529	360.5	212.1	74.3	2660	81721	20967	0
KOS-A_17	230.5	378.6	16.8	128.9	22	43.3	81.6	30.9	183.2	33905	360.2	251.8	101.3	3592	68981	24585	0
KOS-A_18	235.4	372.2	14.8	114.8	24.9	39.6	77	29.1	182.4	31332	352	206.6	74.1	2828	61338	18326	0
KOS-A_19	242.9	376.4	16.8	143	26.5	46.6	86.1	31	188.2	36053	364.3	261.5	84.2	3526	64547	25205	0
KOS-A_20	216.8	312.1	13.4	117.9	24.2	39.9	76.2	25.7	184.5	31492	342.3	209.1	78.3	2815	45714	18505	0
KOS-A_21	241.8	372.5	16	140.2	25.3	42.1	81	27.3	195.5	35150	386.2	245.4	92	3474	68352	25552	0
KOS-A_22	252.5	395.1	13.8	107.1	23.6	36.2	80.5	27.6	205.3	33109	349.1	296.4	79.3	2975	80088	18569	0
KOS-A_23	221.5	391.6	15.7	100.3	22	40.5	77.5	27	185.9	32782	337.5	251	82.4	3231	85598	21178	0
KOS-A_24	262.5	411.7	13.4	110.5	24.1	34	81.5	24.7	210.5	34055	370.1	324.4	77.6	2992	84353	18856	0
KOS-A_25	230.1	340.2	20	132.3	24.5	39	81.3	27.4	171.9	32549	318.6	232.1	81.5	3045	66195	22265	0
KOS-A_26	229.2	369.6	16.9	127.6	24.2	33	79	27.4	193.8	32788	337.6	241.3	87.2	3066	72915	23969	0
KOS-A_27	228.5	331.5	14.3	142.7	26.4	50.5	103.2	40.9	209.6	34069	508.6	265.4	86.1	3552	50867	23818	0
KOS-A_28	238.1	370.8	17.9	141.4	24.8	42.3	84.3	20.7	187.3	34781	326	211.9	87.5	3221	55948	24162	0
KOS-A_29	242.7	394.1	18.1	125.6	23	43.9	78.2	27.3	179.8	34250	368.1	225.1	87.7	3240	63016	20176	0
KOS-A_30	236.7	344.2	15	144.1	26.3	46.4	86.4	29.4	191.4	34277	426.4	206.6	77.2	2918	57050	22154	0
KOS-A_31	243.8	395.5	20.5	137.2	23.9	37	78.9	36.1	211.8	37214	376.4	327.1	90.4	3510	56754	23577	0
KOS-A_32	232.8	409.7	16.4	132.1	23.1	42.4	78.3	26	182.1	33845	321	234.1	78.6	2990	83834	22889	0
KOS-A_33	235.4	361.1	15.1	132.1	23.9	42.9	76.5	28.6	202.4	33039	493.1	241.3	83.5	3152	70731	22291	0
KOS-A_34	228.3	345.2	18.2	133.2	24.2	42.9	78.9	32.8	172.1	31578	373.7	207.4	77.8	2873	62927	22065	0
KOS-A_35	244.8	380.2	15.9	142.6	26.2	48.7	83.8	35.5	196	36066	369.3	277.2	86.9	3553	63166	24718	0
KOS-A_36	226.3	368.9	13.7	127.3	23.4	42.3	77.3	28.5	186	33164	295.8	236.2	85.5	2969	67673	21168	0
KOS-A_37	249.9	381.7	20.1	143.3	26.5	40.2	89.9	24.8	185.1	35967	348.6	237.7	83.1	3399	59809	24351	0
KOS-A_38	235.4	378.8	16.6	145.4	27.4	47.8	80.2	27.8	201.7	36303	374.1	184.7	77.9	2720	51380	20199	0
KOS-A_39	235.3	389.4	17.6	141.9	26.7	41.7	83.1	34.4	190	37750	380	280.4	81.3	3427	62291	24387	0
KOS-A_40	230.4	371.9	17	128.2	23.9	34.1	77.4	32.5	182.3	32026	381.7	237.6	82	3022	68545	20974	0
KOS-A_41	240	367.6	19.1	137.5	25.6	37.8	88.9	26.5	182.9	34646	352.4	249.8	80.1	3182	66971	23619	0
KOS-A_42	234.8	394.4	14.3	90.5	26	39.4	80.1	35	203.1	33150	341.5	230.7	80	2930	73500	17125	0
KOS-A_43	231.3	369.3	20.7	139.3	26.3	45	85	29.9	177.7	34643	343.8	188	95.3	3189	58559	23594	0
KOS-A_44	238.1	365.9	15.9	142.3	26.4	44.4	80.2	29.3	180.2	33875	371.1	196.1	85.9	2979	49992	21289	0
KOS-A_45	219	361.7	16.1	124.9	24	32.8	82.8	30.3	191.5	32096	435.7	263.9	74.8	2758	84143	20723	0
KOS-A_46	224.2	366.7	15	130.6	24.8	43.3	78.2	30.2	200	34245	357	218	79.3	2959	53730	20248	0
KOS-A_47	222.8	349.2	17.3	128.5	24.6	36.4	78.9	33.3	184.5	31180	355.7	232.4	82.6	2870	81037	22513	0
KOS-A_48	229.6	354.4	20.9	140.5	25.9	46	88.9	43.2	206.2	34865	380.7	227.2	85.1	3489	70152	27837	0
KOS-A_49	236.9	383.4	19.9	136.2	23.6	32.9	80.2	39.6	207	36412	395.8	308.8	88	3497	51936	23282	0
KOS-A_50	237.1	370.6	16	119.2	23.7	40.1	77.8	31.8	192.4	32096	366.5	207	71.8	2828	59552	18887	0
KOS-A_51	248.4	325.5	19.1	146.8	26.8	47.8	87.7	35.1	184.9	33460	503	206	85.1	3059	59259	22519	0
KOS-A_52	241.4	395.4	16.4	138.3	25.6	50.5	77.5	28.4	176.4	32985	364.6	207.7	82.2	3287	67312	24127	0
KOS-A_53	228.5	376.2	13.7	111.1	25.3	39.2	77.9	31.8	194	32522	341.2	221.9	67.7	2808	59095	17273	0
KOS-A_54	245.7	399	17	121.5	23.8	38.6	78.6	21.3	179.8	33507	332.2	258	77.2	3053	72826	20855	0
KOS-A_55	230.5	378.6	15.7	141.4	26.6	42.2	89.8	31.3	198.3	35032	377.3	226.9	81.5	3100	52068	21968	0
KOS-A_56	222.6	328.3	12.6	125.1	25.2	41.4	78.6	32.2	179.6	32335	330.3	206.2	73.4	2970	46872	19484	0
KOS-A_57	241.4	352.7	15.5	134.5	24.8	51.5	77.8	27.5	172.7	33869	280	252.2	94	3377	59674	23262	0
KOS-A_58	223.6	373.8	15.6	138.3	26.8	45.1	78.6	31.2	187.8	34307	330.4	186.6	88.6	2835	54543	20811	0
KOS-A_59	222.9	356.5	16.5	127.9	24.6	39.4	79.5	33.4	188.2	31318	435.6	217.2	80.9	2817	83883	21762	0
KOS-A_60	247	373.6	17.8	126.3	24.7	41.9	85.5	32.3	194	34197	351.3	254.8	96.5	3464	72038	22983	0
KOS-A_61	247.5	382.9	20	141.9	27.5	50.5	84.7	25	186.5	35129	357.9	195.7	92.3	3292	61188	24222	0
KOS-A_62	223.8	350.7	12.3	109.9	22.4	39.8	70.7	27.9	180.6	31330	321.1	232	80.2	2914	57711	17398	0
KOS-A_63	228.9	398.2	15.5	112.8	22.2	42.1	73.2	33.7	191.8	32189	361	241.1	80.5	2969	78466	19826	0
KOS-A_64	252.2	419.2	15.9	133.2	22.2	57.3	80.1	26.4	172.6	30571	317.5	208.8	78.2	2950	62314	21615	0
KOS-A_65	229.6	377.7	15.8	140.9	26.9	42.3	83.1	35.3	184.1	36729	373.8	256	78.6	3299	62406	24173	0
KOS-A_66	231.7	371	17.3	129.2	21.8	40.9	76.7	23.9	167.1	31988	294	231.1	93.7	3460	75634	25116	0
KOS-A_67	255.9	394.8	18.9	128.6	26.4	34.1	88.5	22.6	184.5	35500	348.8	253.2	77.1	3051	69132	21126	0
KOS-A_68	236.5	394.6	15.1	133.9	23.2	38.6	80.6	32.2	209.7	34831	398.6	246.1	79.7	3049	66344	22249	0
KOS-A_69	240.2	389	22.8	134.4	23.8	36.4	79.6	32.9	210.2	36810	404.7	283.5	83.9	3335	56001	21850	0
KOS-A_70	235	399.9	18.3	127.8	23.1	49.9	77	30.1	159.8	31752	343.7	201.1	86.7	3107	64857	23101	0
KOS-A_71	226.8	354.9	20.8	132.6	25.9	33.2	85.5	26.7	166.2	32960	335.9	193.1	73.5	2707	70386	21500	0
KOS-A_72	237.2	372.1	15.7	139.1	25.9	47.6	80.2	31.8	207.1	34385	432.2	231.6	81.2	3080	64900	21808	0
KOS-A_73	233.5	371.4	17.7	126.2	25	42.3	81.9	29.9	216.8	33983	447	224.2	84.9	2988	77278	20664	0
KOS-A_74	231	349.9	17.9	139.8	26.5	45.7	85.9	44	194.6	34313	392.3	219.1	89.3	3293	64968	25713	0
KOS-A_75	208.5	342.2	17.6	121.1	23.5	32.6	78.5	31.7	173.9	29497	330.1	207.2	74.9	2476	87390	20776	0
KOS-A_76	252.4	359	18.7	139.1	23.9	45.7	79.1	25.8	163.7	31595	317	220.3	88.1	3417	64388	23856	0
KOS-A_77	239.2	388.7	13.6	127.6	24.4	42.6	80.9	27.5	230.1	35656	407	261.8	87.2	3184	73501	22622	0
KOS-A_78	234.7	388.3	15.4	142.6	27	46.4	83.9	31.8	179.1	37021	357.7	256.4	82.1	3332	65137	24403	0
KOS-A_79	242.7	364.2	17.2	136	24.2	41.9	81.8	32.2	185.6	33902	366.5	235.8	80	3146	61786	23144	0
KOS-A_80	227.1	385.2	14.6	125.8	24.3	34.3	80	33.1	190.1	33456	363.6	235.1	81.4	3084	60808	21697	0
KOS-A_81	244.2	376.9	17	141.1	25.3	45.2	84.8	26.5	191.4	35706	380.6	241.7	89.5	3551	68051	25683	0
KOS-A_82	226.9	343.5	18.5	130.9	23.1	41.1	73.1	22.7	148.9	31322	306.8	172.8	68.9	2654	50296	19208	0
KOS-A_83	244.2	377.4	16.3	138.1	24.6	48.3	81	33.9	200	34410	359.6	271.5	88.6	3536	63490	24455	0
KOS-A_84	243.2	358.5	19.9	141.1	26.9	45.1	82.2	25.7	180.1	34361	304.2	203.5	94.2	3296	63466	23887	0
KOS-A_85	240.6	372.1	15	125.1	25.5	40.8	83.3	39.5	198.5	34260	420.6	264.5	86.1	3090	74720	21959	0
KOS-A_86	229.1	379.1	17.7	127	24.3	39.8	78	24.5	179.4	33585	354.5	220.1	71.2	3080	67363	21309	0
KOS-A_87	240.1	341.5	19.2	150.1	29.1	49.2	99.4	31.9	204.2	36309	402.7	217.5	96.4	3513	47330	24727	0
KOS-A_88	248.3	362.1	18.8	148	28.2	46.4	86	27.2	204.1	36123	385.6	224.2	98.1	3514	60636	25399	0
KOS-A_89	231.1	375.7	14.7	131.2	24.4	39	74.4	33.6	229.3	33698	520.4	260.7	75.6	3009	78472	21837	0
KOS-A_90	232.9	371.9	20.1	123.4	25.1	45.5	86.7	37.6	200.3	35130	355.9	239.1	83	3402	74247	24205	0
KOS-A_91	220.6	377.7	15.7	123.1	22.9	40.5	78.7	31.2	207.6	31206	379	228.1	83.3	2913	83762	22534	0
KOS-A_92	227.7	346.5	13.4	111.6	23.1	40.4	82.1	29.3	205.5	32835	365.4	252.7	88.9	3340	46464	19692	0
KOS-A_93	229.7	377.8	16.6	134.4	25.2	35	76.4	28.7	214.7	34915	397.4	234.1	79.8	2824	66300	21721	0
KOS-A_94	242.3	331.4	19.7	136.6	25.4	45.5	81.9	32.6	176.9	32567	402.2	207.5	87.1	3124	63070	22354	0
KOS-A_95	229.3	339.3	17.2	127	23.9	37.4	80.7	31	197	32507	403.9	240.6	83.2	3051	64365	22026	0
KOS-A_96	228.4	349	13.8	111.6	23.5	39.7	83.5	29.1	211.2	33255	385.9	251.4	92.5	3308	59606	20950	0
KOS-A_97	225.4	332.7	14.6	111.3	23.3	40.6	79.3	26.5	199.6	32400	330.6	250.5	89.5	3347	53726	21131	0
KOS-A_98	219.7	341.9	19.7	127.8	24.2	35.9	77.5	26.8	165.3	30422	320.7	180.5	72.6	2523	71076	20257	0
KOS-A_99	208.3	352.6	12.5	116.4	22.8	39.2	73.6	30.2	179.9	31135	311.4	224.9	90.8	3026	64829	21285	0
KOS-A_100	232.7	386.8	15.1	137.8	22.7	35.4	82.3	28.8	221.2	36155	385.9	257.2	83.9	3124	66909	23455	0
KOS-A_101	231.4	380.9	18.3	127.3	23.4	43.6	76.7	24.3	184.5	33156	333.4	199.7	79.4	2974	66368	21565	0
KOS-A_102	231.9	395.3	16.5	122.8	23.3	40.7	82.5	32.3	186.1	33523	349.8	226.9	93	3078	79224	22017	0
KOS-A_103	230.6	388.4	15.3	122	23	38.5	75.3	24.8	181.2	31141	343.4	201.3	72.2	2662	72726	19745	0
KOS-A_104	235.6	381.4	18.9	128.3	24	44.6	78.6	27.9	190.4	34279	353.9	212.5	79.9	2936	66939	20882	0
KOS-A_105	220.1	374	13.7	125.8	23.2	34.5	77.2	33	224.3	33415	457.3	256.8	79.6	3001	79540	22230	0
KOS-A_106	241.9	382.8	15.3	120.6	24.4	52.2	81.8	26.6	189.8	35287	322.8	269.8	89	3414	70055	22367	0
KOS-A_107	243.4	360.9	19.4	139.8	25.5	44	81.4	24.6	184.9	33576	344.1	208.7	82.4	3180	56122	22915	0
KOS-A_108	239.4	372.7	19.1	142.3	25.7	45.8	80.9	28.5	166.4	34954	360.8	212.9	87	3098	54521	22686	0
KOS-A_109	247.9	364.6	19	149.5	27.3	45.5	86.2	32	200.8	36416	351.6	240	100.9	3527	59278	25225	0
KOS-A_110	233.3	357.8	16.9	127.5	26.2	44	80.4	25.7	194.1	34482	350.6	203.2	88.2	3084	57039	20360	0
KOS-A_111	241.2	366.1	19.2	142	26.4	44.7	83.5	24.1	192.7	34835	343.5	205.5	84	3110	55333	22705	0
KOS-A_112	229.3	368.1	15.1	125.6	23.9	48.1	74	32	191.1	31653	347.1	228.6	78.2	3086	56748	20567	0
KOS-A_113	233.1	363.2	14.2	139.3	25.9	43.9	80.4	30	176.6	33885	389.4	193.7	83.8	3154	61356	23589	0
KOS-A_114	236.2	377	17.7	119.9	25.3	38.4	79.7	28.2	186.3	33702	351.9	227.8	81.1	2945	65972	20569	0
KOS-A_115	236.3	356.5	19.2	126.3	24.8	43.4	80.6	25.9	191.2	33004	371.4	196.4	72.3	2959	52790	19098	0
KOS-A_116	233.2	381.1	17	137.7	25	41.9	82.8	25	201.7	35322	399.1	222.1	77.1	2963	69874	22025	0
KOS-A_117	240.9	385.8	16.8	116.3	24.8	37.8	89.5	38	208.9	35212	390.6	247.6	104.1	3258	79457	20931	0
KOS-A_118	241.4	370.6	17.2	125.5	24.9	43.2	85.6	22.9	197.3	33907	365.5	190.9	67.3	2713	61287	19078	0
KOS-A_119	214.5	363.8	15.1	125.4	24.3	34.2	80.6	32.1	178.2	31572	323	240.3	81.7	2754	72859	21211	0
KOS-A_120	222.1	341.5	15	122.2	24.8	38.1	77.3	29.3	190.8	31533	367	233	79.3	3057	72213	21985	0
KOS-A_121	217.6	369.8	12.5	119	23.6	31.3	76.4	26.3	196.2	32667	320.8	237.8	74.7	2847	55947	19121	0
KOS-A_122	208.5	324.8	14	108.8	23.9	35.4	77.3	28.4	193.9	30338	359.1	224.8	75.2	2854	69303	19905	0
KOS-A_123	229.2	359.1	18.9	126.5	24.6	37.6	87.7	30.1	194.8	34109	385.5	242.3	84.9	2996	73306	21521	0
KOS-A_124	233.5	400.6	17.4	127.8	23	34.3	74	25.5	176	31889	318.3	201.7	78.2	3015	63313	21336	0
KOS-A_125	234.4	376.9	17.3	143.4	25.9	46.1	85.1	26.1	209.9	37464	406.1	240.8	82.5	3221	64782	23799	0
KOS-A_126	234.8	387.2	14.3	107.6	24.3	41.8	72.7	30.7	191.1	29294	321.6	207.5	66.6	2692	59017	16264	0
KOS-A_127	227.7	365	17.8	136	26	37	85.5	27	183.2	34449	354.7	221.8	75.7	2759	64977	21424	0
KOS-A_128	228	367.9	16.4	129	23.7	43.9	77.8	33.2	183.9	32606	364.9	218.8	83.4	3213	67191	23728	0
KOS-A_129	233.8	354.6	21.7	142.4	26.5	44.7	90.7	39.2	198.4	35537	376.9	219	84	3440	66435	27244	0
KOS-A_130	233.1	339.7	15	122.2	26.3	41.4	81.3	29.2	190.2	31499	388.3	182.5	69.9	2697	54037	17522	0
KOS-A_131	230.4	414.1	16.7	99.1	22.8	36.7	79.9	29.1	190.6	33853	350.3	252.7	70.2	3036	78861	18600	0
KOS-A_132	252	375.2	16.4	141	24.9	49.6	82.7	36.8	202.9	34993	372.7	277.6	89.2	3591	61351	24395	0
KOS-A_133	254	407.5	14.4	115.5	24.2	31.3	77.2	29.1	218.1	34433	406.6	317.7	76	2970	81533	19558	0
KOS-A_134	239.5	357.8	14.6	136	25.6	44.5	77.7	29.8	175.3	32058	356.9	211.1	85.1	3015	55467	21655	0
KOS-A_135	228.6	356.1	17.3	138.3	26.1	44.8	84.1	43.6	183.8	34854	385.4	217.9	89	3145	64595	24094	0
KOS-A_136	259.1	392.3	18.4	144.1	25.2	47.4	82.1	29	206.8	35980	394.5	210	66.5	2855	55274	20383	0
KOS-A_137	250.1	367.9	19.7	146.2	24.6	44.1	87	26.7	162.7	35293	375.2	230.1	90.9	3634	48759	24192	0
KOS-A_138	233.5	400.5	14.6	138	25	45.4	80.5	28.1	179.3	35288	337.5	244.9	80.5	3139	78927	24009	0
KOS-A_139	223.1	356.1	16.9	117.9	24.1	32.9	75.8	31.4	207.2	33704	386.8	275.2	76.3	3236	59035	21047	0
KOS-A_140	232.6	349.8	19.4	138.6	25.5	42.9	81	31	171.9	33465	345.6	186.2	81.6	2934	56335	22371	0
KOS-A_141	225.3	335.1	13.9	130.2	25.8	43.2	81.5	38	184.1	33443	355.4	213.1	80.7	3086	52386	21365	0
KOS-A_142	225.3	375.9	14.6	136.5	25.5	45.3	79.7	29.9	178.7	34672	370.9	197.7	92.2	3247	65396	23790	0
KOS-A_143	219.3	362	12.8	126	25.4	35.8	79.5	31.5	188.9	32471	349.3	215.3	72.4	2995	60335	21599	0
KOS-A_144	226.8	377.2	16.4	125.8	23	41.8	81	29.3	210.2	32381	345.2	226.3	87.1	3083	75922	22167	0
KOS-A_145	241.6	370.1	17.5	117.4	24.3	38.9	83.2	33.9	187	33287	335.6	237.4	98.9	3286	74969	21345	0
KOS-A_146	236.9	340.4	16.7	147.8	27.4	47.8	103.5	38.7	193.1	35404	424.1	243.9	84.9	3539	43691	24150	0
KOS-A_147	246.8	404.8	15.4	134.7	22.6	49	80.3	30.6	199.8	33012	358.3	243.9	80.3	3090	65162	22195	0
KOS-A_148	225.3	415.4	16.3	122.7	22.9	31.2	75.3	31.1	193.9	32491	359.7	211.1	73.1	2747	65519	19819	0
KOS-A_149	228	391.1	14.7	132.9	23.2	30.2	74.2	35	248	36365	467.3	273.8	76.6	2883	73273	21791	0
KOS-A_150	242.3	378.6	17.1	147	25	45.5	88.3	33.4	177.7	37669	387.6	272.7	97.7	3822	52116	25211	0
KOS-A_151	244.9	381.4	19.4	139.3	24.7	37.2	79.4	32.9	209.8	35925	389.5	292.8	90.7	3522	58801	24346	0
KOS-A_152	228.9	390.6	15.3	131.3	24.8	40.4	72.1	33.6	201.5	32643	377.8	233.1	82.4	2954	66839	21705	0
KOS-A_153	236.9	344.7	18.4	140.5	25.7	46.9	86.7	32.1	171.4	33737	356.5	230.5	87.7	3325	50681	23015	0
KOS-A_154	239.1	375.7	16.4	138.7	25.8	42.6	85.2	34.9	192.4	34898	444.3	245.9	99	3325	71201	23791	0
KOS-A_155	237.2	409.7	14.7	119.5	22.2	43	74.9	26.3	211.8	34584	401.4	238.6	80.5	2936	77291	19257	0
KOS-A_156	234.8	391.9	15.5	134.8	24.2	36.9	74.6	34.5	223.3	35391	439.9	261.1	83.7	3060	70219	23040	0
KOS-A_157	229	388.7	14.9	132.1	24	31.8	70.5	35.4	244.2	35724	486.8	278.2	77.1	2950	73810	22255	0
KOS-A_158	216.4	369.3	14.6	124.4	24.3	41.1	79.3	40.1	196.1	32354	340.6	267.3	83.4	3151	75106	24473	0
KOS-A_159	241.2	364	15.4	138.1	25.2	54.2	89.7	33.2	199.3	35289	362.2	262.8	92.8	3445	60145	23802	0
KOS-A_160	245.1	369.5	17.5	143.1	25.6	45.4	80	28.7	187.2	34920	381.1	246.6	90.8	3402	59895	24384	0
KOS-A_161	226.4	359.4	15.1	128.3	24.9	38.9	79.9	31	211.8	31855	600.9	246.5	77.8	2931	86069	19994	0
KOS-A_162	234.6	362.9	17.4	138.2	25.1	37.8	85.6	37	189.2	33202	471.6	220	80	2907	61318	21589	0
KOS-A_163	216.1	360.3	14.5	117	23.9	33.9	79.5	32.1	183.8	30893	327.9	237.9	75.9	2656	71061	19323	0
KOS-A_164	226.8	351.6	14.4	128.7	23.4	43.5	78.4	31.4	184.3	31944	496.9	215.9	70.5	2736	64527	19882	0
KOS-A_165	232.1	379.2	14.6	117.6	23.3	39	82.2	31.2	217.6	33999	478.6	240.3	89	2976	80591	20183	0
KOS-A_166	219.2	329.1	12.6	112.5	25.1	40.2	77.5	25.4	194.8	32396	379.3	233.5	76.5	3368	54087	20884	0
KOS-A_167	226.7	339.1	20.2	129.7	24.1	44.9	82.3	27.2	199.5	34150	389	210.4	78.7	3115	50756	20667	0
KOS-A_168	241.5	368.7	20	143.6	26.7	47.8	82.1	25.9	172.4	35107	365.6	200.7	87.2	3118	54411	22828	0
KOS-A_169	234.7	378.7	17.1	138.3	26.3	43.4	81.6	36.4	189.6	34107	333.6	220.9	90.8	3059	58010	22352	0
KOS-A_170	248	390.1	16.7	134.5	23.8	40.5	82.1	27.4	225.3	35987	406.6	229.1	67.4	2752	63056	19805	0
KOS-A_171	232.5	400.6	14.3	103.2	25.6	34.5	80.3	29.6	200.4	33219	339.2	234.4	74.9	2969	70250	18615	0
KOS-A_172	236.3	334.8	18.5	131.8	25.6	41.6	82.7	32	181	31726	443.4	191	79.9	2803	60708	20406	0
KOS-A_173	220.2	373.1	15.2	123.1	24.5	38.2	77.4	32	178.7	31620	325.2	196.6	87.9	2839	57012	19635	0
KOS-A_174	212.8	364.6	13.4	121	24	41.3	75.6	35.1	195.6	31329	352	247	81.9	3168	77209	24614	0
KOS-A_175	229.8	358	16.2	127	22.9	39.6	74.8	29.7	167.8	31184	296.2	239.6	96.7	3369	73445	24113	0
KOS-A_176	236.8	373.8	16.3	132.7	24.5	44.4	81.5	27.5	211	32439	473.5	236.3	79.4	3148	82340	22606	0
KOS-A_177	232.5	392.2	16.3	136.4	24.3	44.4	83.1	23.8	198.6	34402	374.1	196.4	88.6	3190	80966	24283	0
KOS-A_178	241.4	362.7	17.1	143.6	24	47	87.9	35	163.1	34884	372.4	245.7	94.6	3567	45433	23895	0
KOS-A_179	247.2	370	20.6	140.8	26.1	34.8	85.4	27.8	176.7	35396	334.1	240.6	85.6	3293	55111	23120	0
KOS-A_180	227.1	371	17.2	131.5	25.2	42.1	83.4	36.6	191.6	34989	374.2	233.1	85.3	3172	66875	23144	0
KOS-A_181	230.1	361.2	15	126.2	23	43.9	75.8	30.4	203	32167	526.3	234.3	76.2	2918	71907	20145	0
KOS-A_182	252.9	403.2	13.8	99.1	25.2	36.4	81.5	30.6	200.4	33361	354.5	283.9	75.7	2947	78766	17652	0
KOS-A_183	228.4	407.1	18.5	129.3	24.1	36.5	75.9	26.2	178.6	33401	349.1	202.5	73.5	2864	64768	20728	0
KOS-A_184	222	363	13.7	103.9	23.7	37.6	77.2	26.3	208.5	33466	379.5	246.4	70.3	3139	69685	19530	0
KOS-A_185	241.8	396	15.4	133.4	22.1	43.7	76.9	23.3	173.8	32629	282.9	236.8	85.8	3176	82819	23758	0
KOS-A_186	239.4	358.4	14.8	137.5	26.4	40.7	77.4	29.6	169.9	31365	369.9	190.1	81.5	2861	54081	21114	0
KOS-A_187	218	362.3	15.1	123.4	23	38	72	25	194.8	33375	361	230.7	76.4	2950	59772	20870	0
KOS-A_188	241.9	396.3	16.8	134.7	24.3	46.7	80.2	29.2	201.8	32434	341.6	233.3	85.9	3191	74683	23083	0
KOS-A_189	229.2	354.1	17.9	142.3	26.7	45.7	83.7	29.5	179.4	34138	390.7	173.5	82.5	2858	54574	21485	0
KOS-A_190	223.1	325.6	15.7	126.7	24.8	42.3	78	25.5	184.5	32633	352.1	204.1	79.1	2923	45108	19444	0
KOS-A_191	234.7	369.6	16.9	127.8	21.8	40.1	77.1	25.2	168.6	31752	292.4	237.1	94.8	3487	77480	24990	0
KOS-A_192	237.8	384	15.9	131.2	24.8	46.8	81.9	22.6	187.9	34580	383.4	199	79.3	3089	67798	22473	0
KOS-A_193	237.6	366.4	19.3	121.9	24.1	44	86.1	16.9	204.5	34296	375.8	192	69.9	2659	61324	18690	0
KOS-A_194	232.7	366.7	14.9	132.8	23.5	42	84.1	23.7	200.2	34887	347.5	248.7	90.9	3393	54860	24066	0
KOS-A_195	228	355.7	16.9	131.1	24.9	45.6	78.7	27.4	211.9	31891	579.2	212.3	70.3	2894	81738	20730	0
KOS-A_196	241.3	363.8	15.9	122.6	27.5	43.3	85.3	33.8	189.6	33855	384.2	199.6	75.1	3011	62521	19879	0
KOS-A_197	229.6	347.7	18.1	137.6	25.2	43.7	79.2	31.2	165	32148	370.8	183.3	83.1	2845	56669	21086	0
KOS-A_198	228	353.3	15.3	129.2	23.1	42.6	80.2	26	178.6	32864	324.4	213.3	84.2	3065	55930	21804	0
KOS-A_199	220.7	351.6	14.4	136.8	26.1	46.1	90.8	39.4	189	33170	370	232.4	94.5	3284	50820	22643	0
KOS-A_200	237.4	377.2	15.8	135.4	25.2	46.9	81	26.6	181.8	35289	419.2	196.5	83.4	3202	68517	22523	0
KOS-A_201	236.2	390	15.2	135.8	24.8	47.4	80.6	26	181.5	36353	410.2	204.1	87.4	3405	71833	24230	0
KOS-A_202	222.9	375.4	14.9	130.6	22.7	35.3	79.5	31.5	212.5	34247	407.3	245.3	85.8	3064	76861	23307	0
KOS-A_203	235.6	359.8	19.9	126.8	26.2	39.4	82	22.7	187.6	33204	323.4	185.8	80.3	2889	59131	20912	0
KOS-A_204	231.3	387.8	16.1	130.4	25.2	40.5	81.8	38.4	191.4	34536	376.6	229.1	86.2	3112	68740	22405	0
KOS-A_205	235.4	372.5	20	141.3	23.7	44.6	86.6	34.6	165.4	35058	349.8	229.5	103.5	3592	50195	24101	0
KOS-A_206	249.2	385.1	16.2	115.9	23.7	39.3	81.9	20.1	195.5	33017	365.1	239.8	69.9	2770	71293	18538	0
KOS-A_207	223.7	375.9	14.3	125.5	23.9	37.7	76.5	31.4	210.5	31036	556.6	226.7	68.1	2765	84102	19965	0
KOS-A_208	238.5	393.7	14.2	110	23.7	32.5	78.1	24.9	207	32094	374.1	243.3	71.3	2572	73338	17424	0
KOS-A_209	233.5	389.9	15	141.9	26.2	46.8	82.9	28.5	178.5	36787	373.7	232.6	83.2	3352	71995	25100	0
KOS-A_210	236.3	362.8	17.5	142.4	24.9	46.6	85.6	27.2	205.3	35812	405.7	227.6	80.6	3075	58159	22786	0
KOS-A_211	256.2	412.3	16.8	133.1	23.7	54.1	76.6	27.3	181	33045	373.3	218.3	75.4	3060	64090	22348	0
KOS-A_212	249.8	370.1	16.4	143.6	26	48	84.1	36.9	194.3	34699	363.1	252.9	85.4	3497	58834	23918	0
KOS-A_213	214	377.5	15	120.4	22.2	39.6	77.2	33	193.5	31223	337.5	246.7	92.2	3186	85533	24818	0
KOS-A_214	248.8	379.4	16.6	144.5	25.8	45.5	83.6	33.1	188.8	35666	357.5	250.5	102.5	3598	62523	26151	0
KOS-A_215	226	365.9	16.9	131.7	24.6	44	79	33.5	182.1	33117	355.4	235.2	84.7	3101	65753	23526	0
KOS-A_216	242.7	383.8	21.1	142.2	26.3	38	85.2	40.3	202.8	36317	374.7	283.1	94.4	3369	57414	24452	0
KOS-A_217	227.2	351.1	16.6	122.1	25.1	41.3	80.9	31.3	196.2	32648	362.1	196.9	71.4	2848	53314	18794	0
KOS-A_218	233	388.5	16.5	114.9	24.2	44.6	80.2	37.3	190.9	34538	382	236.2	83.5	3149	75927	20767	0
KOS-A_219	230.9	396.3	16.6	113.7	21.8	42.9	74.8	29.3	201.2	33023	356	223.4	83.2	2974	81064	20192	0
KOS-A_220	237.6	392.1	16.1	101.6	23.9	42.2	79.6	32.7	212.2	33696	350	229.7	80.7	2975	75430	18498	0
KOS-A_221	225.3	404.8	14.8	128.8	23.3	27.8	74	36	221.5	34371	439.2	261	74.1	2821	69483	21104	0
KOS-A_222	243.4	355.3	20.6	143.3	25.4	43.4	86.4	24.4	177.2	34801	352.3	209.3	93.8	3403	47135	23475	0
KOS-A_223	247.5	384.4	17.3	144.6	26	45.9	86.6	35.8	177.3	36236	337.7	234	107.7	3522	61099	26133	0
KOS-A_224	219.1	338.2	15.1	131.5	24.7	38.1	95	36.1	190.6	32556	397.6	278.7	79	3040	66510	22587	0
KOS-A_225	224.5	367	14.9	130.7	25.1	40.6	80.6	39.4	205.3	32782	502.9	228.5	78.8	2952	77046	22015	0
KOS-A_226	238.3	350.8	17.6	136.9	24.5	40.8	75.1	26.5	154.2	31166	323.7	185.2	77.6	2829	53727	20593	0
KOS-A_227	249.5	384.9	20	142.9	26.3	42.1	88.5	23.5	175.4	35357	347	210.8	80.8	3188	57312	23514	0
KOS-A_228	215.6	357	15.1	125.4	24.2	34.1	80.9	31.9	177	31296	333.4	242.6	80	2716	73723	21159	0
KOS-A_229	221.5	397.1	17.4	124.1	23.1	35.7	74	28.6	181.3	31836	392.5	188.6	76	2772	64430	20151	0
KOS-A_230	246.4	404.5	16	133.9	23.4	49.6	79.2	30.2	187.7	32376	343.2	233.6	81.3	3161	62163	22260	0
KOS-A_231	227.4	334.7	13	117	23.1	39.5	73.3	29.3	184.5	31139	296.5	236	85.3	3029	56553	19341	0
KOS-A_232	242	369.4	20.6	137.9	26.3	32.1	87.1	22.9	178.5	35033	332.7	219.2	81.5	3067	61318	23209	0
KOS-A_233	232.3	373.7	15.5	115.4	22.9	38.4	76.7	29.7	196.3	31842	500.4	220.8	66.5	2657	77368	17628	0
KOS-A_234	227.6	398.6	15.7	134.4	25.1	36.3	80.1	32.6	197	34589	372.9	212.5	77.8	2743	58559	20104	0
KOS-A_235	226.4	386.1	20.1	132.9	24.1	41.4	80.3	29.4	167.1	33846	341.8	203.1	82.6	3006	63870	22059	0
KOS-A_236	235.1	375.2	19.8	139.6	27.3	43.3	84.5	25.6	193.2	35476	354.3	203	87.3	3211	65516	23656	0
KOS-A_237	221.2	358.7	15.7	126.1	24.7	40.9	76.2	26.3	191.9	31650	347.8	209.6	81.5	3104	68752	23780	0
KOS-A_238	244.6	377.8	16.5	142.5	25.3	53.3	80.7	26.8	175.3	35348	328.2	246.1	91.7	3281	62893	23853	0
KOS-A_239	229.8	378.7	19.6	132.6	24.2	43	79.6	25.2	177.1	34171	302.4	205.9	82.9	3108	59100	21943	0
KOS-A_240	221.8	369.3	14.6	109.3	23.6	35.1	76.2	26.9	191.6	30398	348.2	190.2	71.6	2437	61618	16909	0
KOS-A_241	228.1	365.8	18.5	124.5	23.7	42.2	82.9	35.2	207.6	33507	360.6	232.1	79.8	3019	77367	22911	0
KOS-A_242	236.4	384.7	16.1	139	25.7	40.4	79.6	32.4	210.3	36366	418.1	269.8	80.6	3284	69053	24031	0
KOS-A_243	254.9	363	19.4	143	25	45.4	84.7	24.4	181.4	34277	309	240.3	94	3664	63158	25351	0
KOS-A_244	225.6	357.8	14.2	119.8	25.2	42	79.2	38.4	206.2	31920	459.4	218.7	75.9	2866	71382	19730	0
KOS-A_245	212.6	342.4	13.7	114.1	21.9	42.5	75.5	39.2	202.4	31182	348.8	268.4	82.7	3218	64660	22075	0
KOS-A_246	232.7	386	17.2	124	23.5	34.7	80.8	32.2	180.9	33014	362.3	216	81.5	2864	66582	19999	0
KOS-A_247	246.6	397.3	20.1	128.8	25.2	34.7	83.7	38.7	204.8	35501	369.7	281.5	83.2	3201	66013	21659	0
KOS-A_248	244.1	390.2	15.6	108.9	24.7	42.5	84.7	34.3	190.8	34729	361.4	256.5	92.2	3454	63009	20125	0
KOS-A_249	237.8	375.2	17.6	123.3	22.7	43.3	77.3	28.3	193.8	32831	303.4	216.2	86.5	3114	71736	21466	0
KOS-A_250	233	381.2	14.4	125.4	24.1	42.8	78.8	25.6	204.9	33540	362.4	228	81.1	2819	66573	20453	0
KOS-A_251	217.1	355.6	14.2	120.8	22.9	40.7	73.5	29.3	195.4	31188	514	206.6	77.2	2692	70951	18895	0
KOS-A_252	222.8	363.1	14.4	138.9	26.7	44.5	79.6	33.4	189.7	34223	350.9	187.5	81	2804	54449	21133	0
KOS-A_253	233.9	351.8	20.7	143.6	26.1	46	88.5	42.1	202.3	35796	341.5	234.2	94.2	3455	61725	25660	0
KOS-A_254	229.3	362.9	16.2	142	27.3	47.3	83.6	38.6	197.8	35924	387.8	202.9	88	2972	58006	22635	0
KOS-A_255	224.6	364.5	12.3	134.8	24.5	41.4	81.1	31.8	216	34449	394.9	228.5	79.6	2957	66801	22866	0
KOS-A_256	247.8	368.1	15.9	141.2	25.2	45.6	80.1	31	201.7	34476	415.5	258.4	90.4	3524	66995	24998	0
KOS-A_257	232	381.3	16	134.7	25.4	44.6	80.2	26.1	193.3	33736	340.4	216.2	88.1	3151	75837	24198	0
KOS-A_258	248.5	369.4	20.1	143.8	26.2	41.8	86.2	34.9	185.9	34789	320.9	251	98.2	3480	61531	25397	0
KOS-A_259	234	376.9	16.7	136.4	22.4	42.1	82.7	32.3	182.6	34930	390	269.5	104.6	3774	61627	25380	0
KOS-A_260	236.7	389.6	17.7	127.9	23.3	42.8	80	23.1	191.7	32179	350	204.6	79.7	3040	79204	21980	0
KOS-A_261	233.4	330.1	20.2	146.4	26.5	50.5	99	31.8	204.2	36049	434.8	233.9	87.5	3504	42368	23656	0
KOS-A_262	237.9	368.5	17.4	131.2	23.4	45.3	79.7	33	179	31952	355.6	217.8	77.4	2965	70391	22025	0
KOS-A_263	236.6	369.4	19.4	130.1	25.4	37	82.3	25.5	206.3	34279	344.2	219.7	87.2	3011	70065	22621	0
KOS-A_264	229.5	352.6	16.1	119.6	24.4	40	83.7	28.8	197.2	33090	342.9	215	91.3	3077	62093	20875	0
KOS-A_265	240.9	388.3	17.4	133	23.7	41.9	77.6	31.9	186.6	33677	372.2	214	77.7	3128	60814	22119	0
KOS-A_266	234.6	392.9	17.5	129.4	24.6	34.1	78.5	26.1	181	32905	291.7	225.2	80.1	3070	65438	21672	0
KOS-A_267	222.5	340.6	12.4	133.3	25.4	42.7	81.9	38	177.3	32441	364.8	210.9	72.5	2945	55196	22218	0
KOS-A_268	249.1	377.3	17.6	143.1	26.1	46.7	85.5	39.3	204	35351	365.9	279.6	94	3542	60972	24911	0
KOS-A_269	216.7	349.2	14.6	117.7	23.6	40.8	80.3	30.3	195.7	32546	345.6	227.4	92.4	3172	53195	21339	0
KOS-A_270	226	367.2	16.3	127.7	22.8	39.6	76.8	31.2	169.6	31565	318.9	231.1	96.4	3285	71753	23859	0
KOS-A_271	242.5	418.1	14.5	132	22	50.6	77.9	25.1	177.7	31776	310.6	225.3	79.9	2939	78320	22443	0
KOS-A_272	254.1	383	19.7	146.3	26.8	45.8	86.6	36.4	204.8	36116	379.4	238.1	82.3	3151	57499	23361	0
KOS-A_273	238.8	356	19.8	141.1	25	46.8	83.9	34.9	187.5	33669	382.1	219.8	81	3420	65536	25861	0
KOS-A_274	241.3	375.2	15.7	129.3	24.9	44.5	80.3	30.2	215	33071	522.3	221.3	71.2	2866	78591	19934	0
KOS-A_275	236.2	368	19.8	128	24.5	41.8	80.4	23.9	201.2	33694	331.5	192.1	80.8	2896	63748	21080	0
KOS-A_276	235.9	372.3	18.6	144.2	26.9	45.9	81.6	26.3	179.8	35730	364.4	192.6	81.1	2885	51787	21346	0
KOS-A_277	233.5	378.9	18	136.5	24.4	44.8	82.3	30.7	191.9	33819	336.6	221.6	83.6	3153	75870	24897	0
KOS-A_278	234.3	392.5	17.7	131	24.6	47.3	75	30.7	174	30493	372.2	204.7	78.8	2986	67789	21707	0
KOS-A_279	224.8	384.4	16	134.3	25.2	42.9	79.3	29.8	177.1	34355	340.9	204.6	88.1	3139	66287	22844	0
KOS-A_280	228.8	381.2	17.5	131.5	24.4	43.3	83.3	31.3	177	34746	378.8	201.5	93	3261	68227	23618	0
KOS-A_281	235.8	393.1	14.5	89.7	24.9	39.3	78.7	33.7	211	32723	344.6	228.1	74.9	2831	74253	16381	0
KOS-A_282	235.3	370	18.5	123.9	25	42	89.2	39.2	209.6	34770	392.3	235.1	92.6	3314	76550	23833	0
KOS-A_283	232.2	369.8	16.7	145.9	27.7	48.1	81.2	28.5	197.7	36013	385.5	180.4	81	2733	51462	20455	0
KOS-A_284	210.6	324.4	10.4	121.9	24.8	39.3	77.2	35.8	185.3	31505	348.4	208.3	72.5	2900	54032	20758	0
KOS-A_285	242.3	355.3	15.3	142.1	25.8	50.3	95.4	40.6	208	35007	413.3	285.1	92.4	3683	53026	24469	0
KOS-A_286	233.7	369.4	16.5	135.9	24.8	44.3	78.2	30.1	173.9	32465	334.8	212.7	87.1	3189	60206	22602	0
KOS-A_287	230.9	375.7	16.4	128.3	24.6	42.5	81.8	32.2	179.2	33367	352.7	217.9	82.1	3268	71859	23230	0
KOS-A_288	227.5	371.7	14.1	101.4	23.5	37	76.1	32.1	195.5	30397	330.8	207.3	69.7	2695	54553	15167	0
KOS-A_289	220.3	336.6	13.7	113.2	24.6	37.6	74.7	26	187.2	31511	345.1	224.3	74.1	3177	58347	20477	0
KOS-A_290	234.2	384.6	16.9	121.5	23.4	35.9	80.2	23.5	179.1	32871	334.5	263.2	75.1	2920	76881	21123	0
KOS-A_291	235.4	355	17.7	146.2	27.4	47.5	82.6	27	181.7	35062	395.1	182.4	80	2845	51714	21191	0
KOS-A_292	256.4	413.5	15.9	114.5	24.3	34.2	80.9	25.1	192.8	33962	349.1	298.9	74.1	2973	82299	19102	0
KOS-A_293	230	329.8	16.2	137.1	25.7	44.2	81.2	26.5	185.2	32322	513.4	177.3	72.1	2699	62186	19908	0
KOS-A_294	237.5	398.1	16.4	119.7	22.6	50	75.4	31.1	189.4	31746	345.3	228.3	82.1	3058	74524	22478	0
KOS-A_295	244.1	370.9	15.4	134.8	25	46.4	85.1	37	192.5	34321	374.9	259.5	87.1	3317	61816	22921	0
KOS-A_296	244.4	391.5	16.4	129.2	24.3	44.5	77.5	30.8	187.6	34083	379.1	227.2	81.9	3205	68480	21046	0
KOS-A_297	223.3	349.9	15	132.1	25.3	36.6	81.7	37.7	191.4	33122	362.5	224	82.5	2988	66024	23507	0
KOS-A_298	223.1	388.9	15	123.2	24.2	41.8	73.9	33.2	181.3	32517	328	208.5	89.6	2929	66011	19896	0
KOS-A_299	238.6	364.5	16.6	126.8	27.3	44.9	85.6	34.7	188.9	34966	428.9	229.6	80.8	3117	67249	21552	0
KOS-A_300	230.1	365.8	16.9	123.9	23.1	39.1	81.3	31.7	194.7	32884	358.9	245.6	76.4	2880	76235	21379	0
KOS-A_301	225.1	361.8	17.5	124	23.7	26.9	80.6	25.7	192.8	32086	337	256.6	79	2776	77433	22284	0
KOS-A_302	242.3	359.4	14.9	130.9	25.9	44.7	100.2	38.8	203.7	34349	423.7	283.4	82.3	3413	56311	21712	0
KOS-A_303	233.7	373.4	15.7	138.2	24.3	41.4	84.3	25.4	198.7	34529	428.8	243.7	88.2	3247	67743	23471	0
KOS-A_304	232.5	368.3	18.6	132.6	24.9	33.1	77.7	25.1	207.6	33969	375.7	227.2	80.4	2907	65635	22385	0
KOS-A_305	227.4	365.4	15.9	119.1	24.3	31.7	79	28.6	207.1	31841	438.2	244.4	78.2	2814	75462	19556	0
KOS-A_306	242.2	393.1	16.3	138.9	26.2	50.5	81.4	31.1	169.4	34719	362.4	225.4	78.7	3283	64155	24031	0
KOS-A_307	239.6	339.4	17.2	147.2	27.2	47.2	83.7	26.1	178.1	33667	421.5	174.4	75.9	2923	53933	21640	0
KOS-A_308	229.3	412.3	15.3	127.6	24.8	30.1	82.2	26.2	192.6	33548	321.5	233.9	78.5	3001	65742	21231	0
KOS-A_309	247.1	349.6	17.6	147.7	27.2	47.5	88.6	29.6	185.8	34867	400.8	216.5	88.6	3318	58220	24179	0
KOS-A_310	240	386.7	15.9	115.6	23.6	39	79.7	29.7	215.5	33229	430.8	259.1	79.4	2906	83630	19194	0
KOS-A_311	237.2	385.5	17.7	128.1	24.7	41.5	86.2	36.1	184	34772	356.6	225.9	102.4	3298	68929	23192	0
KOS-A_312	234.8	373.2	15.5	121	23.9	44	76.1	27.5	183.6	33004	397.3	204	76.8	2859	66075	18170	0
KOS-A_313	228.3	386	15.2	132.8	22.8	43.5	78.8	22.1	216.9	35391	384.9	240.8	82.8	3095	69690	22988	0
KOS-A_314	218.8	357.3	13.9	121.4	23.5	40.2	75.5	37.2	192.5	30529	326.8	256.8	86.9	3188	74817	24181	0
KOS-A_315	229.3	330.3	16.3	136.9	25.8	44.6	82.4	28.6	192	32609	523.2	184.5	73.7	2782	64400	20668	0
KOS-A_316	224.8	413.8	15.2	129.7	23.7	28.8	80.1	35.6	189.9	33749	373.5	242.2	73.5	2845	63686	20896	0
KOS-A_317	252.9	382.2	18.6	141.8	24.6	46.4	79.3	25.4	182.1	34111	380.7	206.5	68	3023	59080	21395	0
KOS-A_318	215.2	378.7	17.2	121.2	23.5	32	74.7	30.6	176.7	30303	344.1	194	71.1	2538	74581	19829	0
KOS-A_319	244.7	347.9	20.8	150.2	27.5	45.3	90.5	39.6	192.6	35692	407.1	228.9	97.4	3250	57863	23985	0
KOS-A_320	248.5	394.7	15.6	134.7	23.5	51.5	78.9	27.7	172.2	30984	340.6	201.9	78.8	2945	59253	21455	0
KOS-A_321	226.8	353	17.4	130.3	23.9	44.4	80.4	35.4	204.8	32979	492.6	224.9	78.3	3077	72762	22907	0
KOS-A_322	229.9	381.4	15	136.7	25.5	40.7	84.2	36.7	210.1	35515	393.8	240.7	88.3	3136	68773	23868	0
KOS-A_323	244	373.8	15.6	142.7	24.7	44.3	82.1	26.5	197.2	35023	374.9	254.1	93.2	3516	62738	25503	0
KOS-A_324	229.9	374.5	14.3	114	25.7	41.4	79.3	34	194	32530	358.6	218.9	76.9	3098	70954	21193	0
KOS-A_325	234.9	381.7	19.5	135.4	25.6	37.9	87.4	25.7	189.7	34314	337.6	209.8	82.1	3045	70142	23388	0
KOS-A_326	243.7	336.5	16.1	148.9	27.7	52.5	86.9	27.1	180.7	34609	407.9	201.9	85	3107	56880	23027	0
KOS-A_327	221.6	358.6	15.7	120.6	22.1	38.3	72.8	28.9	205.3	31818	583	228.4	71.1	2689	73785	18589	0
KOS-A_328	224.6	344	15.8	128.7	24.2	45.8	79.9	39	189.9	33819	381.9	238.2	86.9	3235	57149	22405	0
KOS-A_329	234.5	405.4	16.7	121.5	22.9	42.8	77.5	28.6	198.2	33016	364.5	212.2	83.9	2941	82127	20250	0
KOS-A_330	240.7	385.6	15.2	132.1	24.7	43.2	76.2	29.7	170.1	31246	365.9	204	80.5	2921	59475	21563	0
KOS-A_331	232	397	17.6	123	22.7	42.3	80.4	25.5	217.2	32658	337.4	203	84	2867	85981	21302	0
KOS-A_332	236.5	392.4	19.8	136.1	24.4	48.7	75.8	22.7	169.5	32306	323.5	201.5	77.4	3121	61429	22715	0
KOS-A_333	235.7	377.8	16.8	126.3	24.6	40.2	81.1	28.7	181.7	33162	362.5	211.2	88.6	3073	66813	21513	0
KOS-A_334	238.2	381.4	15.9	138.7	24.2	38.6	82.5	38.4	227.5	36572	424.3	248.6	79	2989	66576	22347	0
KOS-A_335	227.4	372.2	12.8	97	23.8	36.1	74.9	31.1	202.5	30104	327	207.9	63.9	2572	55935	14120	0
KOS-A_336	229.6	365	16.2	129	25.1	38	85	30	205.3	34689	329.8	245.7	91.6	3258	54177	22011	0
KOS-A_337	231.5	366.9	17.9	121.2	22.6	43.2	76.3	27.8	189.8	32542	330.9	196.9	76.3	2786	66609	19608	0
KOS-A_338	224.5	359.6	15.1	127.7	25.2	36.5	82	32.2	216.7	32443	612.1	259.7	82.6	2942	86795	19701	0
KOS-A_339	240.1	380.9	16.9	141.9	22.7	38.4	84.8	33.7	206.3	36964	412.4	274	94.6	3510	55940	23498	0
KOS-A_340	225.3	380.9	16.6	110.8	23.6	42.5	79	32.9	189.6	32826	340.3	253.9	78.9	3116	76303	21551	0
KOS-A_341	232	380.7	16.2	138.6	26.6	36.8	85	30.7	188.7	34145	373.4	213.3	79.7	3006	62177	22402	0
KOS-A_342	237.6	368.1	19.7	141.5	25.7	47.2	80.4	29.2	169.9	34330	366.2	210.2	82.6	3089	56310	22882	0
KOS-A_343	237.3	353.6	15.9	146.8	26.6	47.1	86.4	25.1	182.6	35492	417.8	191.8	85.1	3245	60171	24346	0
KOS-A_344	226.3	364	13.7	125.1	24.4	41	82.6	25.4	201.3	34696	382	233.5	87.9	3362	58820	23055	0
KOS-A_345	239.3	394.4	16.7	139.6	26.6	50.2	75.7	28.3	184.4	32774	341.5	195.7	77.6	2865	57614	20947	0
KOS-A_346	256.1	390.7	17.7	143	25.2	48	82.5	29.6	197.6	35698	375.3	218.4	77.5	3068	59584	22227	0
KOS-A_347	229.8	369.2	17.6	122.1	22.9	32.4	79.5	33.9	227.5	35629	399.1	309.7	87.6	3391	52288	21881	0
KOS-A_348	223.6	377.9	17.2	128.8	23.6	42.5	75.3	23.3	189.3	32055	458.2	204.2	72	2932	76025	21496	0
KOS-A_349	223.4	336	13.5	125.9	25.1	45.1	89.1	31	214.2	34233	398	247.6	88.7	3298	45170	21611	0
KOS-A_350	217.1	365.1	15.3	125.4	23.3	36	78.7	28.7	210.4	32388	383.1	230.8	77.9	2623	85023	21249	0
KOS-A_351	225.5	367.5	14.1	128	24	38.8	80	29.1	224.3	33314	571.8	253.2	80.9	2889	83076	20222	0
KOS-A_352	223.5	376	16.3	120.8	24.4	34.5	79.2	28.8	200.4	32006	475.7	224.1	73.8	2694	76844	18559	0
KOS-A_353	230.8	399.9	14.9	127.7	21.5	42.9	77.9	29.4	196.9	32497	359.8	239.1	84.9	3064	75514	23021	0
KOS-A_354	249.4	371.3	18.6	145.8	26.9	45.2	88.1	35.3	190.9	35222	361.7	242.8	86.9	3465	59466	24728	0
KOS-A_355	237.7	387.1	17.1	126.1	26.2	37.2	81.2	38.8	217.1	35281	400.8	264.1	87	3119	68711	22292	0
KOS-A_356	227.7	321.8	14.2	120.5	24.3	42.4	83.9	29.5	207.7	32821	419	245	90.6	3274	51550	21538	0
KOS-A_357	215.9	327.8	12.1	110.3	25.1	39.8	76.3	23.9	198.6	32010	374.3	224.7	71.8	3246	57378	20786	0
KOS-A_358	251	391.7	15.4	138.4	24.7	59.3	79.6	27.6	175.3	34484	322.3	255.7	94.1	3433	66042	24866	0
KOS-A_359	212.2	351.9	14.6	116.4	22.3	41.6	76.6	39.9	197.9	31084	340.7	259.9	84.7	3163	68472	22849	0
KOS-A_360	232.2	359.2	17.4	134.2	24.3	43.2	76.9	27.7	177.5	31891	442.6	196.4	74.4	2840	69367	20953	0
KOS-A_361	238.4	387.8	16.7	133.2	26.5	43.6	81	29.5	197.6	35309	360.7	201.1	75.1	2748	60750	19133	0
KOS-A_362	229.3	365.9	16.3	136	26.3	40	84.3	33.9	204.9	34551	509.2	255.7	86.1	3115	77244	21521	0
KOS-A_363	235.7	415	13.9	132.3	22.3	44.9	76.7	25.2	182.7	33048	304.2	239.2	83	2954	89233	23240	0
KOS-A_364	244.7	374.1	15.4	128.5	22	48.6	77.1	23.6	166.9	30748	280.2	218.7	82.6	3169	59427	21655	0
KOS-A_365	237.9	366	15.8	124.3	24.7	40.6	80.7	22.6	190.4	32234	369.7	191.7	73.3	2633	60240	19007	0
KOS-A_366	243.5	366.4	19.9	145	27.1	40.1	91.1	27.9	169.1	35974	348	208.1	78.2	3085	51979	23044	0
KOS-A_367	242.3	332.7	18.2	143	26.1	45.6	81.1	26.2	165.7	32389	381.9	185.8	78.5	3091	56548	22271	0
KOS-A_368	247.2	374.9	18.3	147.8	23.8	47.6	89.3	31.3	175.7	36514	378.2	256.1	108.2	3913	45348	24678	0
KOS-A_369	219.5	359.8	15.3	125.7	23.7	30.8	79.7	31.5	194.8	32175	388.7	265.7	73.4	2688	78477	21369	0
KOS-A_370	248.5	387.3	20.5	138.5	24.3	38	82.9	33.2	210.2	36157	380	308.5	88.4	3605	60211	24432	0
KOS-A_371	236.6	353.3	17.8	133.4	23.4	42.3	75.7	24.3	171.1	31147	400.8	200.5	74.4	2974	69841	21255	0
KOS-A_372	218.4	387	14.5	128.8	24.6	36.4	76.9	35.7	180	32144	320.5	209.9	88.2	2871	60132	20811	0
KOS-A_373	242	366.3	16.2	132.5	25.2	43.8	85.7	36.2	185.7	33793	370.4	252.1	77.3	3124	64669	22987	0
KOS-A_374	241.8	371.9	15.9	129.8	26.1	42.3	84.4	40	192.3	34861	388.7	259.6	88.7	3161	70263	22767	0
KOS-A_375	211.7	356.1	16	105.7	23.4	30	75	30.3	184.4	28563	341.9	185.1	65.3	2202	74631	16338	0
KOS-A_376	210.9	331.6	10.2	110.4	22	36.1	75.7	31.4	210.3	32331	345.6	247.2	81.3	2890	54875	18596	0
KOS-A_377	252.6	366.7	18.6	151.1	24.1	48	91.6	34.7	165.2	36753	383.8	262	107.7	4126	39586	25395	0
KOS-A_378	240.2	356.7	16.1	128.9	23.9	43.6	82.5	33.5	194.2	32678	336.9	242.7	89.8	3260	63573	21837	0
KOS-A_379	235.5	366.7	17.4	125	23.7	40.5	78.1	31.4	166.7	32066	307	228.9	90.8	3241	64732	21832	0
KOS-A_380	231.8	347.8	13.5	123	25.2	43.9	78.4	29.4	202.9	33191	376	254.7	80.4	3431	59463	22320	0
KOS-A_381	222.4	361.7	13.8	114.6	25.1	38.9	76.8	30.2	188.2	32013	336.7	216.8	78.2	3008	63395	19576	0
KOS-A_382	232.6	323	14.9	132.1	24.8	44	80	31.8	184.2	32083	377.5	223.8	84.1	3188	54544	21299	0
KOS-A_383	221.8	364.5	14.8	118.6	24.2	36.6	76.2	33.3	189.3	30196	351.5	212.3	76.8	2696	65757	20299	0
KOS-A_384	241.4	351.2	22.5	146.5	26.4	49.4	86.4	22	190.1	36037	360.1	201.6	86.4	3235	51826	23307	0
KOS-A_385	228.5	395.9	18.2	127.8	23.7	39.3	81.2	24.4	195.4	33768	340.2	220.5	79.2	3000	76113	21723	0
KOS-A_386	242.9	371.1	17.5	131.1	24.8	37.1	79.8	24.9	202.8	33898	363.7	229.1	72.7	2902	63524	21342	0
KOS-A_387	240.5	349.7	19.9	138	25.9	40.2	81.1	22.5	179.2	32953	307.5	193.3	86.1	3071	54300	22428	0
KOS-A_388	220.3	374.7	15.1	126	24.7	42.3	76.2	34.2	184.7	32252	301.2	202.6	92.8	2942	63586	20901	0
KOS-A_389	228.8	379	19.9	136.8	23.8	47.1	79.5	23.5	172.8	34409	319.8	211	82.6	3280	64276	24717	0
KOS-A_390	241.5	361.7	15.4	131.6	24.8	45.7	83.8	32.6	208.8	34597	369.3	274.6	90.1	3520	56606	23402	0
KOS-A_391	240	349.7	22.4	147.2	26.1	51.7	87	24.3	190.8	36396	374	214.6	87.2	3285	55228	23513	0
KOS-A_392	212.6	324	13.2	117	24.3	36.3	78.6	27.1	186.7	31769	325.7	236.3	78.3	2787	57579	19265	0
KOS-A_393	230.6	360.9	16.9	130	25.6	40.7	85.3	38.6	207	34095	358.8	268	94.9	3317	60377	24171	0
KOS-A_394	244.8	350.3	16.9	143.8	25	47.2	93.2	33.8	179.6	34252	346	250.8	97.3	3700	53742	25359	0
KOS-A_395	229.8	378.6	17.5	127.4	24.8	41.8	76.9	27.4	180.8	32893	324.1	194.6	86.1	2929	61821	20396	0
KOS-A_396	218.5	356.7	17.3	132.7	25.8	40.3	78.6	30.4	184.2	32687	351.3	189	76.4	2520	69131	20008	0
KOS-A_397	230.9	396.6	13.8	132.8	23.3	37.2	74.6	29.3	235.8	35556	439	266.4	80.4	2947	78709	22660	0
KOS-A_398	216.3	333.3	11.5	100.3	22.7	38.8	73	26.7	182.7	31234	299.6	242.7	76.8	2954	55470	17240	0
KOS-A_399	224.8	391.8	15.2	126.7	23.9	31.9	81.4	34.2	196.7	33321	365	230.5	80.9	2913	60823	20767	0
KOS-A_400	229.8	349.3	13.2	124.9	24.6	42.1	77.8	31.1	181.7	30926	349.8	208.2	85.1	2955	55861	20521	0
KOS-A_401	229	363.9	16.5	127.9	26	39.5	81.8	30.4	184.6	33142	410.4	202.6	73.5	2753	62745	20124	0
KOS-A_402	228.2	322.4	15.2	131.2	24.6	45.9	80.7	30.8	188.5	32414	412.3	212.1	77.2	3115	53412	20965	0
KOS-A_403	224.6	360.5	17.5	128.4	24.3	42.1	82.6	32.5	179.2	33117	352	204.2	86.7	3150	55567	22171	0
KOS-A_404	238.8	389.5	17.3	117.9	23.4	45.4	78.4	24.5	203.2	32335	344.2	206.5	73	2744	70791	19225	0
KOS-A_405	239.3	357.5	18.3	138	27.4	39.9	87.4	27.4	177.5	35028	359.6	196.7	73.6	3186	53829	22410	0
KOS-A_406	229.4	398.1	16.4	110.2	24.4	43.2	81.2	28.2	183.8	35106	349.2	255.2	77	3283	80592	21513	0
KOS-A_407	257.4	377.8	18.1	147.9	26.8	48.2	84.6	31.6	191.4	35533	381.7	196.8	67.4	3019	52767	21324	0
KOS-A_408	216.3	385.3	14.6	123.6	21.3	35.5	76.7	31	202.6	33154	373.9	254	92.1	3202	84485	24476	0
KOS-A_409	241.2	364	16.6	138.1	23.6	46.7	85.6	35.8	179.2	35524	357.5	261.3	105.4	3796	50050	24702	0
KOS-A_410	244.7	388.9	19.8	135.1	23.2	33.2	78.8	28.6	188.4	34440	316.8	274.7	86.5	3453	61102	23393	0
KOS-A_411	243	389	15.3	138.5	25	51.8	79.3	27.4	183.3	34961	318.6	249.7	91.9	3313	63905	23767	0
KOS-A_412	235.3	354.1	19.3	136.8	24.8	45.4	84.2	39.2	193.4	33919	378.2	225.6	81.8	3282	69532	25061	0
KOS-A_413	233.9	372.3	22.2	136.3	25.3	43.4	84	24.3	189.7	35474	369.6	205.6	75.6	3064	59286	21227	0
KOS-A_414	221.7	362.6	14.4	112.7	22.8	42.1	76.7	29.2	213.8	32303	359.5	231.6	82.7	3080	70675	21525	0
KOS-A_415	238.6	364.9	16.8	142.4	26.4	44.1	84.8	35.2	175.9	33951	359.6	197.4	78.3	3255	60947	23447	0
KOS-A_416	232.4	377.3	13.5	108.3	26	40.3	81.6	37.6	195	33390	349.3	225	80.8	3016	68447	19928	0
KOS-A_417	223.9	372.1	14.5	117.9	22.4	46.9	75.2	36.5	189.8	30825	344.3	255.5	83.4	3186	70166	23261	0
KOS-A_418	232.5	377.5	15.6	133.3	25	44.7	79.2	26.6	203.4	32770	465.4	218.1	79.2	2956	84464	22135	0
KOS-A_419	226.5	380.1	19.5	132.6	24.1	42.6	82.3	34.4	165.5	33550	333.7	198.1	94.9	3148	60956	23316	0
KOS-A_420	237.6	345.5	14.6	143	26.5	49	92.9	35.8	188.1	33616	401.6	242.5	89.2	3358	48473	23338	0
KOS-A_421	230	383.3	16.2	137.8	25.1	43.6	81.8	28	179.8	35640	380.4	207.9	80.9	3247	69533	24048	0
KOS-A_422	236	386.5	16.8	132.1	23.3	44	78.9	28.8	190.7	33628	366.5	222.5	82.3	3095	71063	22986	0
KOS-A_423	236.2	384.9	18.9	129.8	24.5	38.3	80.8	27.7	211.5	35771	380.5	244.4	77.2	2889	56874	20031	0
KOS-A_424	231.7	379.1	16.6	141.9	27.4	43	85.9	34	180.9	36669	365.7	259.1	81.7	3270	67174	24560	0
KOS-A_425	221.5	334.2	13.5	119.4	24.6	42.7	84.4	36.1	212.6	33964	391.4	249.3	93.1	3311	54749	22609	0
KOS-A_426	226.1	342.7	14.1	118.8	23	41.7	79.4	25.6	198	32303	375	240.7	86	3308	55668	21974	0
KOS-A_427	249.5	338.1	19.2	146.2	26.5	48.2	89.1	33.4	190	34087	474.2	230.6	88.2	3317	61932	24023	0
KOS-A_428	224.2	348.4	14.7	120.8	22.5	41.4	74.6	26.1	196.8	31346	522.8	215.4	73.3	2830	68147	19386	0
KOS-A_429	225.4	359.3	17.7	131.1	24.9	38.4	82.1	35.5	172.5	32338	328.5	217.8	90.8	2922	77066	23136	0
KOS-A_430	232.3	399.8	15.7	112	22.5	39.7	78.6	31.8	193.1	33306	378.6	238.4	92.9	3146	83564	20616	0
KOS-A_431	243.8	388.5	17.2	136.9	23.8	43.3	78.1	24.1	169.4	31984	352.4	208.5	73.8	3098	61438	22149	0
KOS-A_432	231.6	360.7	19	131.1	23.4	38.3	76.8	31.6	177	32910	310.7	221.7	87.8	3143	63714	22444	0
KOS-A_433	222.1	365.3	12.5	105.2	21.9	40.8	69.9	27.3	184.9	31818	341.8	226.2	76.2	2817	61045	16373	0
KOS-A_434	225.4	349	16	127	23.6	45.5	77.4	31.8	183.8	33584	366.7	240.1	81.2	3202	54124	21288	0
KOS-A_435	235.4	351.4	17.4	130.3	22.7	35.9	80.9	25.3	165.7	31476	291	250.1	82.4	3145	74214	23084	0
KOS-A_436	213.1	366.7	13.5	119.3	23.5	39.1	72.6	31.7	199.3	31140	368.8	242.4	81	3203	75864	24352	0
KOS-A_437	217.8	367.5	15.3	117.6	23.4	29.3	77.3	30	200	31522	389.5	239.9	69.2	2496	74805	19271	0
KOS-A_438	218.6	358.5	12.8	123.2	24.7	43	76.3	27.1	191.4	32850	385.6	216.7	80.9	3304	70762	24080	0
KOS-A_439	247.9	362.6	16.3	132.5	26.2	45.3	82.1	28.5	199.6	33560	398.5	191.3	65.5	2726	53064	18312	0
KOS-A_440	227.6	346.2	14.2	121.1	24	40.7	82	30.5	213.7	33168	465.4	257	86	3223	64083	21045	0
KOS-A_441	227.8	374	17.5	113.9	24.2	33.1	80.1	33.5	180.9	31320	342.3	224.3	67.4	2588	86465	18622	0
KOS-A_442	243.2	370.3	16.9	137.3	24.6	44.9	79.8	25.3	182.8	33960	331.6	248.4	87.8	3236	66635	23893	0
KOS-A_443	209.8	318.1	10.6	108.1	24.5	39.5	73.2	24.7	194.1	31558	345.4	219.4	72.3	2952	49143	18264	0
KOS-A_444	230.9	380.3	15.6	139.4	26	38.8	94.8	33.5	197.6	34439	378.1	252.9	83	3321	53283	22981	0
KOS-A_445	225.5	351	14.9	129.5	24.7	44.1	79.4	36.6	185.1	32783	343	216.5	82	3191	54718	21344	0
KOS-A_446	252.5	406.9	15.7	125.5	25.5	43.7	77	27.2	188	32350	342.1	253.1	76.3	2940	70172	19957	0
KOS-A_447	251.9	422	16.2	128.7	22.3	57.3	76.1	26.4	166.5	30829	338.2	217.4	80.1	3089	65671	22633	0
KOS-A_448	232.6	345.3	14.8	120.5	25.4	40.9	87.4	30.8	206.6	33870	415.7	227.9	91.9	3166	62815	20888	0
KOS-A_449	244.2	355.7	17.8	139	24	45.4	77.4	26.8	159.2	31902	355.8	206.7	75.5	3182	57831	22604	0
KOS-A_450	232.1	397.6	17.2	129.8	23.5	36.4	73	26.4	181.1	32097	373.4	197.3	72.3	2908	62252	20961	0
KOS-A_451	221	330.4	15.3	120.8	23.7	44.2	83.2	29.4	199.1	33060	350	219	89	3143	53893	20812	0
KOS-A_452	227.2	365.8	15.4	142.5	27.2	45.4	80.9	31	193.5	35261	363.9	184.1	78.3	2769	52643	20969	0
KOS-A_453	246.1	367.6	17.4	133.6	23.1	44.4	82.2	32	183.4	34168	340.5	251.8	99.2	3577	57806	22862	0
KOS-A_454	245.2	355.9	20.5	146.3	25.6	47.3	83.3	25.2	190.6	35172	396.5	221.6	85.7	3414	56397	24151	0
KOS-A_455	259.8	389	17.6	127.4	27.4	39.3	86.5	24.6	202.8	35399	360.1	264.8	87.5	3170	72019	21162	0
KOS-A_456	240.7	368.1	15.5	132.9	25.2	45.1	78.1	29.3	184.5	32626	351.8	210	84.6	2970	61598	21420	0
KOS-A_457	235.9	330.6	17.3	140.7	26	47.3	94.5	38.1	183.3	33468	363.8	254.4	92.3	3578	48502	24086	0
KOS-A_458	232.7	378.1	17.3	139.5	25.8	44.3	82.2	32	178.4	35258	363.9	235	88	3342	63777	24455	0
KOS-A_459	231.8	376.6	17.2	130.5	23.9	35.9	81.8	25.9	196.3	32535	339.6	224.9	82.1	2893	74641	22617	0
KOS-A_460	240.7	372.4	16.6	136.3	24.3	44.2	78.4	35.4	195.4	34489	386	233.6	83.6	3223	62279	22946	0
KOS-A_461	213.6	358.1	16.6	122.9	23.7	30.4	73.6	34.7	204.8	31545	405.3	236.7	73.2	2560	85380	20797	0
KOS-A_462	232.4	356.6	20.6	134.4	24.1	44.1	78	27.9	167.1	32993	293.4	210.7	85.2	3324	63552	24393	0
KOS-A_463	249.8	378	16.5	138.2	25.4	47.3	79.5	28.2	212.1	33745	497	211.1	63.7	2796	68843	19881	0
KOS-A_464	239.7	384.3	19.8	134.8	24.3	32.1	77.4	35.9	203.1	35008	392.9	287.6	84.2	3229	54150	22080	0
KOS-A_465	248.4	411.3	18.2	130.5	23.2	48.8	75.6	30.9	182.7	33680	364.8	267.3	85.9	3338	63579	23630	0
KOS-A_466	223	371.7	14.6	125.4	23	35.3	70.9	31.5	224.6	33402	543.2	243.6	73.1	2744	75485	20154	0
KOS-A_467	224.3	369.3	15.3	129.6	24.6	40.3	79.8	26.4	188.4	32992	351.9	222.3	82.2	3212	68567	24543	0
KOS-A_468	238.1	363.9	18.6	134.7	23.6	41.5	79	27.7	160.1	31979	303.8	203	90	3242	61018	23138	0
KOS-A_469	217.7	349.6	15	130.1	25	42.9	80.5	38.7	196	32383	370.5	218.7	80.1	3214	70230	25341	0
KOS-A_470	228.8	353.4	15.7	130	25.8	43.2	80.5	22.7	187.3	34371	376.6	198.3	81.1	3265	60398	23095	0
KOS-A_471	229.9	374.5	15.4	110.3	23.9	35.2	77.5	27.8	196.9	30717	351.5	203.9	69.3	2618	60916	17111	0
KOS-A_472	226.4	415.1	18.1	126.9	23.7	34.1	75.6	26.7	182.1	33210	346.7	205	71.7	2836	67291	20495	0
KOS-A_473	240.4	372.1	18.4	140.3	24.6	46	78.1	25.4	164.6	33564	363.4	208.8	79.6	3064	59894	22374	0
KOS-A_474	235.8	387.5	14.5	100.2	25.2	38.9	82.5	34.9	212.4	33093	435.5	238.9	83.7	2993	83530	18418	0
KOS-A_475	242.2	390.6	18.5	132.6	23.8	44	79.5	30.5	183.5	34754	366.3	228.7	77.2	3170	67973	21938	0
KOS-A_476	230.7	352.8	14.5	124.1	24.9	44.1	79	30.7	197.9	33155	368.8	248.1	81.6	3380	59397	22268	0
KOS-A_477	222.2	351.8	12.4	114.9	23	43.8	79.4	32.2	197.8	31441	407.7	240.5	88	3084	67308	20425	0
KOS-A_478	244.5	373.7	20.1	143.2	24.9	47.8	85.6	25	194.1	35406	363.9	236	85.6	3367	65244	24188	0
KOS-A_479	237.1	344	24.2	145.6	26.4	45.6	87.4	21.1	191.7	35744	376	187.7	81.9	3122	50588	22677	0
KOS-A_480	247.2	384.7	13.1	103.8	23.8	33.7	78.5	27.3	195.1	32502	337.1	285.6	71.7	2850	73439	16883	0
KOS-A_481	249.1	370.1	19	141.5	26	43.7	85.4	30.4	185.4	35218	339.9	246.8	86.6	3430	58569	23951	0
KOS-A_482	230.8	408	15.2	128.4	23.4	36.8	78.6	31.1	187.1	34411	391.5	223.1	79.4	3042	68988	21457	0
KOS-A_483	235.1	391.5	15.3	105.4	22.7	40.1	72.1	29.5	188.2	31497	341	214.7	73.1	2794	67519	16094	0
KOS-A_484	236.5	401.7	13.8	115.3	23.7	29.7	78.9	30.4	197.1	32797	369.9	270.6	72.6	2899	70094	19265	0
KOS-A_485	218.7	328.9	13.2	116.4	26.1	41.4	78.8	29.4	199	32878	385.1	220.7	77.8	3249	58324	21519	0
KOS-A_486	232	401.4	15.3	134.3	23.3	34.7	81.8	31.1	193.2	34100	358.3	244.9	81.5	3085	61347	22575	0
KOS-A_487	223.8	363.8	14.1	126.2	24.3	40.5	74.2	30.8	225.4	31424	607.3	233.4	68.2	2792	89248	20384	0
KOS-A_488	236	396.3	17.7	117.3	23.9	38.8	83.9	32	202.4	34651	368.9	235	88.3	3079	79932	20605	0
KOS-A_489	246	356.4	18.1	143.6	25.9	48.6	84.1	34	188.2	34486	420.7	240.2	87.5	3291	58749	23355	0
KOS-A_490	237.2	401.3	15.6	136.9	24	43.8	81.1	24.2	179.5	34737	337.9	222.5	83.2	3112	79646	24021	0
KOS-A_491	233.1	345.2	23.3	143.7	26	48	86.2	23.7	196.9	35808	400.5	196.9	82	3249	53987	23307	0
KOS-A_492	246.4	388.5	16	125	24.4	45.5	90.5	34.6	192.1	32994	376.4	244.5	74.6	3108	64158	20125	0
KOS-A_493	223	330.7	12.7	119.6	23.4	43.7	80.6	30.7	189.6	31650	359.1	218.5	85.8	3097	57049	20620	0
KOS-A_494	228	375.6	16.9	127.7	23.9	28.1	74.8	29.1	218.5	33776	403.2	259.3	79.3	2858	75520	22429	0
KOS-A_495	246.5	384.2	21.6	136.7	26.7	37.5	84.9	31.7	209.7	36763	377.6	253.7	88.1	3311	59595	22481	0
KOS-A_496	252.5	363	21.4	152	29.8	48.6	90.2	25.1	205.1	37357	372.4	184.2	93.1	3283	53825	23944	0
KOS-A_497	239.2	363.1	20.1	144.9	26.2	45.5	84.1	31.5	178.8	35762	337	220.4	92.3	3175	52864	22670	0
KOS-A_498	233.3	353	18.1	145.8	27.1	45.1	88.2	45.7	193.9	36188	350.5	228.3	98.9	3296	59727	24601	0
KOS-A_499	249.7	362.8	20.6	146.4	26.3	47.7	84	25.7	193.7	35315	396.2	193.7	75.2	3003	50254	21401	0
KOS-A_500	237.1	370.9	18.6	147.9	27.6	45.3	87.9	36.3	186.8	37538	325.1	242.6	93.5	3370	59308	24186	0
KOS-A_501	259.5	379.9	18.4	146.9	25.9	48.7	82.7	27.6	205.8	36046	397.6	226.7	75.7	3168	55968	22385	0
KOS-A_502	233	376	20.1	129.5	25.9	34.2	85.6	24.6	174.2	33890	348.2	182.4	74.8	2778	57081	20502	0
KOS-A_503	228.6	390.1	16.6	129.2	23.6	41.6	80.9	24.6	215.2	31676	413.3	202.6	82	2863	90638	21833	0
KOS-A_504	235.6	370.7	23.5	142.9	25.5	44.9	85.8	23.5	187.5	36367	377.8	207.1	78.9	3182	58446	22471	0
KOS-A_505	227.4	331.7	16.8	126.8	24.8	41.9	77.1	25.3	171	31773	381.4	190.7	71.2	2912	55067	20263	0
KOS-A_506	244.1	394	21.1	136.3	23.6	34.9	78.7	37.7	213.5	37073	391.2	322.8	87.6	3493	55828	23326	0
KOS-A_507	241.1	355.1	16.6	132.2	23.3	42.7	77.1	24.9	184	31165	423.1	225.7	80.7	3256	78008	22604	0
KOS-A_508	233.8	363.4	16.7	141.8	26.6	46.7	79.9	29.4	183	34710	341.2	194.9	80.9	2869	52265	21057	0
KOS-A_509	239.9	388.7	16	110.5	24.4	35.9	89	37.3	210.5	34715	398.9	251	103	3231	83430	20755	0
KOS-A_510	236.5	363.4	16.4	128.5	24	38.5	80.1	31.4	216.1	35000	391.1	291.1	92	3524	55677	23453	0
KOS-A_511	230.9	354.5	14.7	126.6	24.6	44.1	80.8	33.2	188.9	34043	349.1	240.2	92.5	3432	57500	23242	0
KOS-A_512	253.2	391.6	17.2	126.9	25.6	39.1	82.5	29.1	187.3	34447	361.1	276.3	83.1	3069	69238	20941	0
KOS-A_513	230.6	412.2	16.8	130.1	24	35.2	82.3	22.8	203.4	32799	325.1	211	80.9	2903	78951	21875	0
KOS-A_514	242.1	376.7	22.3	143	27.3	35.9	91.2	23.7	170.2	36532	349.8	195.4	79.5	3099	55086	23247	0
KOS-A_515	243.1	385.5	15.5	131.9	24.1	41.6	81	31.5	203.2	34220	376.4	223.6	71.5	2865	56529	19865	0
KOS-A_516	228.5	397.7	16.5	134	25.4	36.1	79.8	27.6	179.2	33538	321.1	216.7	82.1	2973	60621	21551	0
KOS-A_517	234.7	413.4	15.4	104.3	22.8	43	78.5	25.9	188.7	33631	323.2	249.8	75.4	3058	88658	20036	0
KOS-A_518	234.3	341.3	19.1	129.9	23.5	41.4	73	26.4	157.8	31068	333.6	198.7	79.6	2975	61618	20861	0
KOS-A_519	236.6	369	18.1	141.9	25.6	43.3	83.3	21.8	189.2	34934	333	199.3	85.3	3076	54215	23090	0
KOS-A_520	235.9	405.7	15.7	82.9	24.4	40.4	80.5	30.3	200	33763	348.9	250.3	72.8	3056	82957	16984	0
KOS-A_521	238.6	396.8	15.8	128.6	21.7	48.8	77.8	25.8	171.5	30905	312.4	222.3	87.1	3191	72367	23459	0
KOS-A_522	219.9	342	13.3	117.8	24.9	41.7	75.4	26.3	205.7	31149	505.7	220	68.5	2972	73968	19992	0
KOS-A_523	246	368.3	17.8	146.3	25.7	52.4	83.3	30.2	178.3	35811	300.3	242.7	95.9	3329	59075	23905	0
KOS-A_524	236.4	371.2	18.1	147.9	28.8	47.7	85	27.4	196.2	37054	366.6	192.3	86.8	3050	54527	22612	0
KOS-A_525	223.8	378.5	16.2	135.4	26	44	81.3	32.2	175.7	34994	359.5	229.9	82.1	3240	67054	24222	0
KOS-A_526	226.7	347	16.1	125.2	24.8	41.4	79.7	24.7	208.2	32059	463.7	213.7	77.6	2964	67383	20876	0
KOS-A_527	234.9	400.6	19.4	128.9	24	40.7	80.4	27.2	180.8	34953	346.2	230.1	73.3	3085	72654	21578	0
KOS-A_528	249.1	392	14.4	128.1	25.3	41.1	81.9	25.8	187.2	35015	388.6	250.8	83.5	3238	74327	22425	0
KOS-A_529	224.5	394.2	16.3	118.2	22.7	36.8	77.1	23.5	191.4	32209	353.8	203.6	76.8	2795	70978	20479	0
KOS-A_530	236	406.3	21.4	131	23.1	28.5	75.9	36.7	214.3	36130	393.8	309.4	83.3	3318	56434	22219	0
KOS-A_531	247.2	404.9	16.4	132.2	24.6	54.9	77.4	30.2	170.4	30613	351.3	224.5	80.1	3200	62907	22922	0
KOS-A_532	243.2	393.4	17.5	120.4	23.9	42.3	80.2	33.6	197.3	33945	376.9	251.9	80.2	3153	77641	21424	0
KOS-A_533	237.8	375.7	16.5	124.7	25.7	40.8	84.9	43.3	194.6	34440	384.5	233.2	81.9	3047	72645	21501	0
KOS-A_534	231.4	352.7	16.4	128.7	25.7	41.2	86.4	36.8	209.9	34665	372.7	263	96.3	3363	54986	23624	0
KOS-A_535	241.5	363.5	19	138	23.8	43.7	77.8	28.4	165.1	33141	344.3	197.3	74	2980	56331	21557	0
KOS-A_536	225.8	357.8	17.7	130.6	24.1	36.5	80.6	36.7	181	32595	365.7	248.5	75.4	2850	65360	21465	0
KOS-A_537	246.5	361.2	16.2	127.9	24.4	41.8	76.6	29	169.9	31665	334.2	227.1	83.4	3243	62780	21517	0
KOS-A_538	233.1	327.1	15.4	147.4	27.1	47.1	98.9	36.6	204.3	34829	468.3	233	83.5	3284	48392	23116	0
KOS-A_539	226	367.7	15.8	131.7	23.9	38.1	82	27.1	196.7	33825	381.4	253.2	78.8	2831	73308	21984	0
KOS-A_540	238	376.1	15.4	132.7	24.7	38.2	76.4	30.5	212.2	34034	411.9	252.4	84.5	3170	66961	22886	0
KOS-A_541	232.8	378.7	18.1	126.4	23.7	31.4	79	23.5	197	32345	333.2	237.3	83.6	2908	76486	22966	0
KOS-A_542	232.1	368.8	16.6	138.2	25.6	44.8	81.5	24	183.8	35053	378.3	194.2	86.2	3298	65461	24779	0
KOS-A_543	249.6	373.8	19	144.4	25.7	46.3	83.6	32.1	202.5	35784	400.8	216.8	79.7	2978	58029	20997	0
KOS-A_544	255.3	405.4	17.4	130.4	23.9	47.3	77.3	28	197.1	34908	390	214.3	68.9	2862	64044	18632	0
KOS-A_545	247.2	378.6	17.7	135.8	24.5	46.9	80.8	24.3	199.8	35052	370.2	214.9	71.6	3018	53763	21019	0
KOS-A_546	220.2	366.5	15.9	130.1	23.6	35.2	79.7	31.8	198.8	33784	394	223.4	79.1	2864	80569	22444	0
KOS-A_547	253.9	379.9	17.7	139.8	24.1	50	83.5	31.1	189.1	34246	364.9	244.9	84	3443	62076	24086	0
KOS-A_548	239.9	374.5	17.8	147.6	25.6	45.1	87	29.2	189.5	36719	333.7	227	96.7	3429	59125	25115	0
KOS-A_549	242.2	377.3	20	146.1	27.8	41	88.7	25.2	179.7	36929	350	193.6	82.7	3041	52972	22751	0
KOS-A_550	222	345	12.8	121.6	25.5	43.1	78.6	25.5	191.8	33912	396.5	213.9	78.6	3349	62153	22667	0
KOS-A_551	238	365.5	17.1	141.4	24.5	43.9	84.7	29.7	189.5	34544	336.3	236.4	91.1	3441	61784	25732	0
KOS-A_552	225.9	378.5	15.8	108.4	23.3	39	74.8	25.8	187.3	31279	316.9	200.8	68.6	2762	58779	17244	0
KOS-A_553	229.4	376.4	17.4	139.4	26.4	44.6	82.6	35.1	191.3	35698	372.7	210.3	83.5	2990	62886	22417	0
KOS-A_554	241.2	364.8	18.9	137.8	23.6	48	78.6	25.9	157.7	31398	356.7	179.9	73.4	2776	56472	20712	0
KOS-A_555	212.8	373.4	14.6	118.2	22.2	39.3	77	35.4	191.7	31262	341.5	256.2	93.3	3232	84315	24936	0
KOS-A_556	221.2	361.8	12.9	120.5	23.2	32.3	77.2	30.1	231.2	34633	415.2	255.9	73.3	3027	66608	20797	0
KOS-A_557	247	351	18.9	149.1	28.6	48.6	88.7	29.2	199.5	35807	392.5	209.9	92	3345	56146	24043	0
KOS-A_558	242.7	381.8	17.4	140.8	25.7	42.6	85.2	35.9	189.5	35716	400.4	251.4	101.7	3428	65750	24662	0
KOS-A_559	237.1	375.2	19.5	134.1	24.8	51.1	83.8	38.1	190.9	33582	373.6	225	84.3	3412	70690	26489	0
KOS-A_560	248.1	376.9	14.9	124.7	25.6	39.5	83.4	38.2	194.2	34162	372.1	279.4	88.4	3181	74195	22020	0
KOS-A_561	236.2	376.1	19.9	139.8	24.4	44.6	82.8	23.1	191.2	34886	355.3	218.3	82.7	3082	69352	23167	0
KOS-A_562	234.3	379.4	15.1	139.8	25.4	47.6	83.4	25.1	183.9	36656	411	200.5	87.8	3432	69746	25456	0
KOS-A_563	247.3	380.9	15	132.2	23.5	46.7	75.7	28.2	179	32036	333.6	243.1	90.5	3271	66427	23146	0
KOS-A_564	215.7	339.1	11.7	132.2	25.5	39.9	80.5	40.2	188	31988	401.4	205.4	73.4	2895	63292	22231	0
KOS-A_565	222.3	361.7	14.2	104.4	24.1	34.3	82.5	31.3	198.2	32127	355.5	261.2	76.8	2841	74902	19355	0
KOS-A_566	232.4	362.7	14.3	131.5	25.1	42	76.3	28.9	191.5	30880	476.5	205.6	75.2	2810	73695	20687	0
KOS-A_567	216.4	373.9	14.7	117.4	23.2	37.4	76.3	34.3	200.7	31384	345.7	242.3	81.9	3025	67281	22271	0
KOS-A_568	236.9	405.1	16.1	136.8	25.6	34	82.3	27.2	190.3	34127	336.4	233.4	78.8	3148	63616	22633	0
KOS-A_569	241.7	378.6	17.3	137.4	24.3	38.2	82.4	23.5	196.8	34580	345	234.9	82	3082	63289	23368	0
KOS-A_570	233.3	379.2	19.1	112	23.2	42.3	77.4	24.6	166.3	32891	325.2	209	68.4	2914	69376	19023	0
KOS-A_571	216.4	347.4	11.9	128.3	25.2	38.8	79.1	39.3	184.8	31779	356.3	197.1	71.7	2842	58592	21477	0
KOS-A_572	231.8	399.5	15.5	132.6	23.8	31.9	80.2	35.1	195	33442	394.2	246	79.6	2997	63720	21813	0
KOS-A_573	232.5	350.2	18.3	140.5	25.6	47.3	87.7	41.1	189.2	34205	378.2	226.5	80.3	3278	61875	25649	0
KOS-A_574	246.3	363.6	20.2	140.4	25.3	53.1	83.6	28.5	177.9	33518	436.2	203.1	84	3168	59954	23271	0
KOS-A_575	241.2	390.1	15.4	132.9	26	40.9	80.5	27.9	207	35639	373.2	235.7	78.6	2799	63638	19737	0
KOS-A_576	230.6	399.4	17.1	130.6	23.7	38.4	81.1	37.3	190.9	33109	374.7	232.7	78.4	3069	66868	23310	0
KOS-A_577	223.5	371.9	17.1	129.1	24.5	40.7	80.6	33	188.8	32909	355.6	234.6	78.3	3012	72489	22823	0
KOS-A_578	236.6	392.4	19.7	121.6	22.6	37.8	77.2	34	222.7	35060	379.6	266.9	81.6	3094	69617	20846	0
KOS-A_579	231.6	375.5	17	138.4	23.9	43.5	83.8	28	176.1	34197	338.5	217.6	88.1	3204	57786	23958	0
KOS-A_580	238.4	369.9	19.9	137	24.2	41.6	82.4	32	169.4	33304	308.9	222.7	94.3	3342	62150	24199	0
KOS-A_581	245.1	355.7	23.3	145.6	26	49.1	89	24.1	197.6	36502	390.2	223.4	85	3446	54790	23831	0
KOS-A_582	256.3	382.2	19.3	127.7	25.2	40.7	85.9	24.2	197.2	35388	381.4	273	81.5	3200	66831	20611	0
KOS-A_583	246.8	375.2	18.3	132	24.3	46.6	83.8	29.8	206.6	34431	371.4	246.5	85.8	3330	69873	23131	0
KOS-A_584	226.7	371	16.6	134.9	25.9	43.3	81.5	37.4	200.8	34005	350.7	237.7	87.4	3027	63836	23266	0
KOS-A_585	232.2	373.3	16.2	137	25.1	44.5	84.1	39.1	183.1	34896	357.8	235.8	103.1	3430	69666	26048	0
KOS-A_586	237.4	329.9	18.3	144.3	26.6	44.7	82.9	25	164.3	32733	399.9	164	72.2	2744	53043	20643	0
KOS-A_587	259.6	395.8	17.6	141.5	24.5	51.9	83.6	27.1	194.1	34130	359.8	233	76.7	3198	59918	22536	0
KOS-A_588	234.6	385.8	16.5	126.7	23	41.7	78.5	28.3	215.3	34641	368.6	233.2	82.7	3041	71214	22005	0
KOS-A_589	242.7	367.4	20.6	147	28.3	46.4	88.8	29.3	188.4	36390	349.2	194	101.8	3374	56976	24947	0
KOS-A_590	240.4	371.5	21.1	144.8	26.4	42.8	88.1	38.1	188.3	36286	301.6	225.2	98.8	3249	58366	22871	0
KOS-A_591	226.4	366.3	16.4	130.3	23	43.4	82.3	37.4	185.6	33095	346.5	270.2	95.7	3533	63096	25018	0
KOS-A_592	225.8	402.7	17.8	119.3	23.3	29.7	73.7	29.4	196	32305	367.5	216.6	72.1	2711	60060	18923	0
KOS-A_593	229.2	386.7	15.2	118.1	23.1	37.1	76.1	27.1	188.2	31312	348.2	200	71.8	2586	70529	18946	0
KOS-A_594	237.1	408.9	14.4	133.6	22.6	44.8	77	25.6	179.8	33136	313.9	236	83.6	3017	85734	23481	0
KOS-A_595	243	385.3	18.4	133.8	24.1	52.4	79.6	32.6	176.7	32502	369.8	218	82.1	3323	67993	25225	0
KOS-A_596	234.2	384.1	18.9	133.6	24.5	34	76.9	36.4	199	34623	370.4	272.9	87.7	3202	54712	21971	0
KOS-A_597	219.6	372	14.7	110.3	23.7	33	74.4	27	193.8	29959	364.6	189.4	69.7	2491	65735	18021	0
KOS-A_598	219.1	337.6	12.6	105.7	22.8	39.5	77.2	20.3	196.8	31624	328.7	210.6	69.3	2557	53492	16341	0
KOS-A_599	225.5	358.1	16.2	122.4	24.2	38.3	85.3	30.3	194.9	33117	372.3	232.4	75.7	2710	72770	20767	0
KOS-A_600	234.9	364.4	18.5	141.5	26	45.5	84.4	26.7	186.9	35539	376.8	194.4	86.6	3331	63614	25287	0
KOS-A_601	237.9	378.9	16.2	127.8	25.5	44.1	82.2	32.2	191.7	33667	332.3	241.8	90.5	3314	64677	22532	0
KOS-A_602	243.8	360.5	18.6	137.7	23.8	43.8	78.2	24.2	162.3	32932	304.9	220.1	87.7	3349	61564	23677	0
KOS-A_603	232	410.9	15.9	133.2	24.2	36.8	80.9	27.4	189.9	33653	321.3	234.3	79	3041	75485	23161	0
KOS-A_604	231.9	376.5	21.2	139.9	24.9	38.5	85	28.3	194.9	35240	392.3	211.2	78.1	3022	54209	21684	0
KOS-A_605	226.9	356.7	16.5	124.6	24.6	42.3	80.4	28.4	185.1	32901	357.8	224.7	82.8	3290	60318	22470	0
KOS-A_606	237.8	367.3	16.6	130.6	24.2	42.9	81.1	33.5	205.6	33673	481.1	243.1	81.7	3122	74677	21367	0
KOS-A_607	230.1	354.8	19.8	133.2	25.2	45.8	87.6	37.3	207.2	34350	380.2	219.1	80.9	3262	70032	25597	0
KOS-A_608	242.9	390.9	17.6	108.8	23.4	39.5	78.3	24.2	175	33031	331.9	243.5	69.8	2920	74399	18458	0
KOS-A_609	221.3	378.4	15.6	130.9	24.6	42.5	77.7	28.1	190.7	33640	356.8	204.9	86.6	2921	67814	22078	0
KOS-A_610	252.6	361.8	18.5	139.1	23.6	45.7	80.6	29	176.4	33824	329.9	226.9	85.7	3455	61093	24011	0
KOS-A_611	220	379.6	15.9	123.2	22.1	36.5	75.7	30.5	176.7	31665	327.4	237.4	91.5	3214	77719	23905	0
KOS-A_612	223.5	384.5	14.9	118.4	22.6	28.9	77.1	29.8	220	33008	395.6	220.1	70.4	2515	67229	18364	0
KOS-A_613	239.7	392.7	15.4	124.5	23.7	45.2	82.9	31	197.6	32129	445.3	236.9	85.8	3012	77092	20488	0
KOS-A_614	233.3	386	14.9	115.5	22.4	42.5	76.8	26.3	196.8	33596	369.8	237	84.2	3130	65533	19750	0
KOS-A_615	224.2	363.2	15.8	128.2	23.2	42.9	82.1	39.9	191.5	32649	347.3	274.9	95.3	3478	65951	25055	0
KOS-A_616	245.2	394.9	17.3	131.3	22.2	43.9	81.6	31.7	183.2	35592	392.5	258.7	96.2	3577	58718	21643	0
KOS-A_617	234.7	385.2	15.4	138.7	25.2	46.4	82.5	26	186.7	36500	401.1	203.1	87.6	3411	70638	25089	0
KOS-A_618	230	365	15.2	131.1	24.9	42.9	80	31.6	202.1	32266	516.9	230.1	79.9	2991	82310	22029	0
KOS-A_619	244.9	385.7	18	137.8	23.3	43.2	86	32.1	172.3	35547	376.3	255.5	102.6	3829	46130	23586	0
KOS-A_620	247.8	355	21.4	152.3	30.4	47.4	91.2	26.1	199.1	37031	361.7	180.7	97.8	3380	54188	24656	0
KOS-A_621	214.1	337.3	12	114.1	23.1	39.5	81.8	32.9	193.4	31948	338.8	248.6	85.6	3014	64795	20664	0
KOS-A_622	215.7	328.5	11.4	117.6	24.1	40	81.5	32.8	206.3	32488	370.3	236	83.3	3161	51667	21596	0
KOS-A_623	248.3	363.2	18.2	140.9	27.1	47.8	86.1	27.5	205.7	35794	370.1	201.5	84.3	3119	54073	21914	0
KOS-A_624	220.7	350.3	15	126.2	23.5	36.8	81.7	31.3	180.4	31610	415.2	245.8	70.9	2677	73064	20702	0
KOS-A_625	243.6	356.9	17.4	137.1	23.9	42.6	76.5	28.2	161.2	31541	334.7	216.9	85	3264	59746	22673	0
KOS-A_626	240.2	389.3	17.7	139.4	26.1	49.5	76.2	27.9	175.9	32800	345.3	201.6	78.7	2933	57324	21369	0
KOS-A_627	238.4	380.2	15.4	119.6	24.4	39.8	80.2	32	198.9	32034	469.5	230.3	65.5	2795	81263	18766	0
KOS-A_628	248.9	406.5	17.3	122.2	23.2	48.2	76	27.5	165.4	31647	343.4	213.8	73.8	2964	69736	20836	0
KOS-A_629	227.6	366.9	14.2	131.1	24	42.3	80.5	23.9	192.3	33656	346.6	231.8	85	3315	62596	24306	0
KOS-A_630	225.6	363.2	15.5	135.6	24.7	44	82.5	38	191.5	33354	353.8	220.4	80.3	3137	72205	24892	0
KOS-A_631	246.1	385.8	17.3	144	22.6	47.1	86.3	29.7	168.7	35744	356.2	265.8	104.4	3851	55360	25092	0
KOS-A_632	234.8	351.9	18.2	139.2	26.1	44.1	83.4	37.5	189	33047	375.6	209.5	84.4	3214	62498	24829	0
KOS-A_633	237.6	351.8	15.4	139	25.7	44	81.8	38.9	179.7	34062	359.1	233.3	96.7	3407	64224	24651	0
KOS-A_634	229	389.3	17.8	125.5	23.8	29.1	76.4	24.9	192.9	32394	340.5	223.9	78.7	2850	69098	21778	0
KOS-A_635	233.1	367.3	16.9	105	24	43.6	83.4	28.4	196.4	33778	402.8	245.2	78.1	3189	71914	19712	0
KOS-A_636	233.3	380.9	17.9	120.3	22.6	42.1	75.5	29.5	209.8	33497	359.6	212.8	76.6	2808	73266	19940	0
KOS-A_637	223.4	393.2	15.9	102.1	22.9	39.5	79	33.7	195.8	32634	338.2	263.5	75.8	3103	81410	20733	0
KOS-A_638	235.8	398.2	16.4	123.8	22.9	47.9	75.2	34.1	183.3	31644	351.6	255.4	84.1	3204	70564	23909	0
KOS-A_639	236.8	410.4	15.1	133.8	23.1	43	79	24.1	180.3	33663	310.9	233.1	81.5	2968	85393	23305	0
KOS-A_640	230.7	384	18.6	133.1	23.2	42.4	77.9	21.2	177.5	32746	306.8	205.3	84.7	3127	70569	23093	0
KOS-A_641	249.2	403.2	15.5	128.6	23.4	52.7	83	29.3	184.9	32910	337	234.4	90	3160	69097	22008	0
KOS-A_642	255.8	386.2	17.7	134.3	24.9	44.1	85.2	26.5	195.8	34713	353.8	282.7	86.1	3524	69177	23938	0
KOS-A_643	221.9	349.2	13.8	120.8	22.4	45.8	77.3	32.3	198.9	33696	382.5	239.4	83.7	3373	61348	22073	0
KOS-A_644	235.2	348.7	18.5	133.7	25.2	40.1	79.7	32.1	184.1	32741	393.9	237.9	90.5	3198	70165	21752	0
KOS-A_645	231.6	397	17.3	139.5	26.4	38.3	82.1	25.3	194.3	35154	345	206	77.7	2893	57445	21143	0
KOS-A_646	224.9	358.1	15.7	132.3	25.3	45.9	82.3	36.2	191.5	35332	371.7	253.7	80.5	3401	62523	23959	0
KOS-A_647	250.9	373.8	20.4	142	26.2	41	88.4	27.4	178.1	36188	363.8	216.4	79.1	3241	57243	23370	0
KOS-A_648	251.7	382	18.9	140.8	26.5	42	87.8	35.6	192	36445	312.5	259.5	99.9	3333	63495	23128	0
KOS-A_649	225.7	350.9	12.2	110.2	23.3	42	79	34.1	203.9	31570	337.1	240.4	82.9	3052	57779	18853	0
KOS-A_650	222.9	340.1	16.1	122.2	23.4	41.3	78.3	29.9	201.2	32360	401.4	235	81.2	3123	59699	20537	0
KOS-A_651	214.1	345.4	15	119.3	23.2	31.3	83.9	29.8	187.1	31463	355	273.2	75.3	2733	77658	21236	0
KOS-A_652	233	393.4	16.6	136.2	23.5	29	83.2	31.2	230.1	36945	409.5	256.8	76.9	2946	68733	22030	0
KOS-A_653	244.2	394	15.2	140.4	25.5	48.9	82.3	26.4	185.1	35422	307.9	260.7	91.3	3346	64643	24006	0
KOS-A_654	250.4	366.1	16.9	141.3	24.9	43.3	81.8	32.3	168.1	33876	294.7	240.3	103.5	3548	60926	25001	0
KOS-A_655	225.7	388.6	17.6	133.5	23.9	43.6	79.3	29.9	174.5	33423	332.4	199.8	86.3	2933	67598	22286	0
KOS-A_656	247.4	357.7	16.4	139.8	24.1	43	79.5	27.8	178.7	33191	318.1	242.3	91.7	3565	64303	25119	0
KOS-A_657	235.1	381.4	20.3	140.1	26.8	42.6	82.4	22.9	187.7	35060	345.4	183.6	87.3	3151	58530	23191	0
KOS-A_658	257	381.4	16.2	145.6	25.7	54	82.1	28	195.4	36078	352.6	252.4	86.8	3338	60516	23718	0
KOS-A_659	237.2	377.7	16.2	129.1	23.6	39.7	79.1	26.6	194.1	31349	309.4	217.7	89.5	3061	76425	21844	0
KOS-A_660	253.4	401.4	16.6	111.6	24.2	41	83.4	26.3	197.2	34374	351.2	292.2	78.6	3321	79446	20665	0
KOS-A_661	235.3	407.9	15.3	131.7	23.7	37.6	75.4	29.6	211.2	33692	399	245.9	75.7	2924	68943	21728	0
KOS-A_662	237.7	388.1	14.6	112.9	23.4	44.4	77.6	30.3	191.6	30577	316.4	207.3	71.8	2733	57660	17058	0
KOS-A_663	232.7	400.3	17.5	121.6	23.1	39.3	76.1	28.4	202.3	33035	350.1	210	77.5	2913	69727	20496	0
KOS-A_664	235.4	362.6	16.1	138.1	25.3	41.2	82.3	25.2	185.7	33177	376.2	210	80	2884	71891	22554	0
KOS-A_665	228.1	366.6	16.6	137.7	26.4	43	85.6	44.7	192.4	35309	388.8	230.2	91	3216	66921	24539	0
KOS-A_666	236.3	365.6	19.7	137.2	26.2	42.6	80.8	21.9	187.7	34218	335.6	179.1	81.1	2875	54538	21126	0
KOS-A_667	236.2	383.3	18.4	131.6	24.1	44.3	82.5	22.9	179.7	34624	329.1	207.6	85.2	3090	62815	22691	0
KOS-A_668	223.7	372.1	17.4	135.4	25	41.7	80.1	25.1	182.3	34107	343.3	210.3	77.1	2803	63639	21479	0
KOS-A_669	225.3	391.4	15.5	115.8	24.1	37.7	74.9	32.2	207.2	34121	382.7	247.4	80.1	3007	74002	20470	0
KOS-A_670	232.3	396.8	18.2	119.8	23.6	45.4	76.7	22.8	172.2	33229	323	208.8	78.6	3106	67179	21808	0
KOS-A_671	235.2	406.6	16.5	131.4	24.6	45.8	75	26.9	181.1	32995	356.8	193.4	78.1	2870	60580	21175	0
KOS-A_672	247.3	393.7	16.2	139.8	24.1	51	83.2	27.8	176.3	32797	333.4	206.1	78.9	3129	58700	22765	0
KOS-A_673	235.6	369.9	16.9	136.4	26	47.7	78.4	33.5	175.6	31355	376.7	203	85.7	3003	61510	21884	0
KOS-A_674	235.5	398.7	16.5	117.1	24	35.7	81.8	32.4	196.5	33424	382.6	222.1	89.5	3062	73918	20429	0
KOS-A_675	247.1	397.4	16.4	129.6	23	51.6	79.9	30.6	197.5	32755	341.2	235.2	82.2	3133	67134	21867	0
KOS-A_676	235.4	355	19.3	145.6	25.5	48.2	91.5	26.6	218.9	36809	432.9	232.9	85.8	3288	55152	23457	0
KOS-A_677	233.8	403.5	15.3	133.4	24	32.5	79.8	32.7	196.3	33737	372.6	251.3	81.3	3103	64383	22420	0
KOS-A_678	227.9	369	15.5	137.9	26.5	46.3	78.4	28.2	206.8	34054	469.6	193.7	74.9	2719	66427	20039	0
KOS-A_679	235.6	396.3	15.5	132.1	24.4	31.1	79	29.4	181.4	32578	313	241.3	82.3	3078	63122	21609	0
KOS-A_680	236.6	393.3	16.9	132	24.6	38.2	77.4	27.8	185.2	32575	358.3	211.6	79.2	3037	60898	21732	0
KOS-A_681	234.8	383.6	14.5	114	24.7	44.1	72.5	29.1	186.6	29579	328.9	211.5	69.1	2863	60185	18257	0
KOS-A_682	243.8	356.1	17.3	139.8	23.3	46.1	90	32.3	181.4	36255	378.7	277.7	110.9	4060	39516	24606	0
KOS-A_683	224.8	375.1	15.2	122.7	24.4	41.6	80	26.3	194.9	32901	331.7	200.9	83.1	2743	63494	19689	0
KOS-A_684	240.5	380.3	15.9	112.3	26.7	42.1	83.9	36.9	195.9	33929	358.3	217.4	76.1	3095	67615	19860	0
KOS-A_685	240.8	389.6	16.5	133.4	23.4	45.4	79	28.1	193.8	33756	369.2	223.9	79.7	3074	70254	22724	0
KOS-A_686	227.8	333.8	16.4	131	26.2	43.5	88.7	27.5	195.5	33352	379.6	218.8	80.8	3260	49118	22214	0
KOS-A_687	228.5	346.9	14.6	120.2	24	43.8	70.7	27.7	168.7	29943	281.2	220.5	79.3	3006	54175	19799	0
KOS-A_688	244	362.4	18.7	139.4	24.5	48	83.7	38	193.6	34817	384.8	231.7	83.6	3435	64292	25205	0
KOS-A_689	222.4	354.8	13.6	124.8	26.5	42.6	79.9	27.3	188.6	34576	372.7	236.3	74.2	3277	62380	22356	0
KOS-A_690	225.9	396.5	14.9	124.5	22.5	39	73.3	26.1	189.5	31882	420.1	211.4	74.3	2743	77301	20365	0
KOS-A_691	228.2	389.9	16.6	129	23.8	39.4	82.4	25.5	215.3	32108	421.9	216	85.7	2901	89986	21612	0
KOS-A_692	250	377.5	17.4	144.8	26.4	48.2	85.6	37.9	194.3	36234	380.3	223	88	3214	58934	23801	0
KOS-A_693	229.9	351.9	17.3	124	23.7	40.9	77.1	29	172	32218	287.9	225.1	85.9	3180	63464	21551	0
KOS-A_694	240.7	384.8	16.2	134.5	24.1	45.8	82.7	31	209.8	33553	351.5	248.6	89.8	3307	73324	23460	0
KOS-A_695	261.8	394.4	18.9	145.5	25.9	48.1	83.1	28.9	204.4	36215	387.2	215.9	66.9	2908	55861	20732	0
KOS-A_696	219.6	343.2	13.4	112.8	22.9	35.6	79.5	29.8	200.7	31657	329.3	240.3	87.3	2989	63804	20631	0
KOS-A_697	251.3	386.6	18.1	144	24.3	50.1	83.4	32.2	166.1	33790	357.5	249	97.2	3755	48851	24106	0
KOS-A_698	238.5	379.2	17.8	123.8	22.7	46	82.9	32	208	34527	363.6	234.5	88.7	3242	66836	21354	0
KOS-A_699	228.4	370.5	19.1	124.4	23.3	41.4	80.9	24.4	174.5	32612	340.8	182.5	76	2707	60941	19822	0
KOS-A_700	231	329.1	16.1	144.9	28	45.9	85.5	29.7	178.5	33148	413.8	169.4	82.5	2873	54231	21491	0
KOS-A_701	234.9	365.7	18.6	138.8	25.6	44.3	80.2	27.9	175.7	34183	426.2	219.7	82.8	2997	60984	21441	0
KOS-A_702	211.3	322.6	12.5	106.9	20.3	44.2	73.3	37.1	206.6	31407	364.8	270.9	80	3350	53082	19673	0
KOS-A_703	231.5	365.6	15	119.8	22.9	40.4	80.4	24.8	200.8	32007	344.4	242.6	84.4	3074	60276	21647	0
KOS-A_704	243.3	374.4	16.9	132.1	25.7	44.5	80.1	29.5	188.2	34561	373.7	239.9	87.6	3277	62403	22710	0
KOS-A_705	211.2	351.6	13.6	115.2	23.1	39	75.6	34.9	193.1	31209	320.1	252.8	79.8	2969	66990	21518	0
KOS-A_706	235.8	361	18.7	130.1	24	40.9	77.3	26.5	179.3	31497	304.9	213.3	88.8	3143	74201	22382	0
KOS-A_707	249.8	366.7	17.8	144.7	26.4	46.6	87.1	32.8	187.3	34799	362.1	232.2	81.5	3481	58729	24169	0
KOS-A_708	251.4	365.9	16.4	125.3	25.4	40.2	84.7	32.3	194.7	33084	436.6	270.3	81.5	3017	74575	20914	0
KOS-A_709	247.2	404	15.9	120	23.3	34.8	79.4	24.7	200.9	34400	358.9	282.7	76.7	3011	76991	20415	0
KOS-A_710	238	357.4	21.2	141.5	26.1	44	82.2	22.2	176.4	34444	347.1	188.1	82.4	3001	51804	22185	0
KOS-A_711	233.4	371.2	15.7	137.6	26	44.7	81	29.3	185.5	34562	432.1	239.1	77.2	3241	74295	23367	0
KOS-A_712	250.7	361.1	19	142.2	25.2	46.4	85.1	33.1	184.1	35154	404.1	221.3	81.6	3298	58752	23552	0
KOS-A_713	239.4	367.6	20.3	138	25.2	36.5	81.8	34.2	208.7	35796	424	266	81.9	3190	55820	22035	0
KOS-A_714	234	366.6	19.3	129.6	24.3	29.6	80.4	23.5	199.2	33309	342.8	240.3	81.6	2908	70468	22783	0
KOS-A_715	243.7	385.2	16.4	126.1	24.4	41	88.1	31.2	202.6	35116	373.6	253.4	97.7	3408	72668	23061	0
KOS-A_716	250.6	361.7	17.9	140.4	23.5	46.7	77.7	23.4	161.5	32454	325.4	220	83.2	3408	61990	23785	0
KOS-A_717	258.7	380.8	17.1	145.9	25.8	47.6	81.6	29	205.7	35682	392.1	241.5	80.8	3287	59089	23280	0
KOS-A_718	243.2	357.9	17.5	128.6	25.1	39.6	76.4	29.6	165.7	31437	308	209.6	81.8	3035	61894	20820	0
KOS-A_719	246.8	379.4	16.2	137.2	26.9	43.1	83.6	31	189	34898	362.7	219.8	75.9	2998	60540	20795	0
KOS-A_720	265.4	387.3	18.6	148.9	25.1	50.2	85.5	29.3	196.1	36731	397	229.6	77.5	3276	47346	21671	0
KOS-A_721	227.2	387	15.8	130.1	25.2	33.5	82.4	29.8	205.4	33127	478.4	247.7	79.4	2988	77444	20936	0
KOS-A_722	236.8	336.1	16.8	125.3	23.1	41.9	76.6	27.8	166.2	31314	260.5	226.9	92.2	3377	60911	22489	0
KOS-A_723	242.8	341.4	15.7	146.2	27.4	49.7	84.5	27.8	178.4	33832	396.2	200.2	84.7	3052	56072	22565	0
KOS-A_724	237.9	364.5	17.2	117.7	23.9	42.2	85.4	18.8	203.3	33211	391.4	193.3	68.7	2528	64856	17997	0
KOS-A_725	215.5	351.6	13.9	116.8	23.5	37.4	75.5	26.6	186.4	32443	357.7	233.1	74.3	2853	60841	18602	0
KOS-A_726	237.5	385.8	17.7	136.8	25.2	40.7	81.3	32.3	181.3	33896	383.8	206.1	88.8	3104	61039	22909	0
KOS-A_727	227.3	352.6	14.9	142	26.4	48.3	97.2	38.2	192.8	35400	417.2	266.2	88.7	3577	55343	25030	0
KOS-A_728	228	350.7	13.7	118.8	23.4	42.3	75.5	28.7	203.3	32858	342.5	238.9	83.5	3075	61078	20438	0
KOS-A_729	233	353.2	17.2	123	23.8	40.1	75.6	33.5	175.4	31109	281.8	252	87.2	3215	70423	22947	0
KOS-A_730	235.1	378.3	17.3	137.2	23.8	45.8	80.4	26.2	177.6	33354	379	215.7	82.4	3024	74520	23234	0
KOS-A_731	246.3	364.7	21.6	147.8	27	47.6	89.6	23.1	181.7	37093	353.6	216.9	86.1	3307	54265	23937	0
KOS-A_732	244.8	381.4	16.1	137.1	24.5	50.8	82.4	32	176.6	32402	343.4	202.9	75.2	3116	57042	21845	0
KOS-A_733	236.5	382.6	14.9	116.3	25.7	38.2	77.2	30.9	185.1	31876	359.8	203.3	78.2	2840	62794	19144	0
KOS-A_734	238.1	373.5	14.2	114.7	24.4	41.9	78.2	34	205.8	32001	344.8	241.5	75.4	3011	58136	18252	0
KOS-A_735	243.3	382.3	16.5	144.7	25	45.3	86.8	29.3	183.2	35989	332.6	236.2	100.1	3491	58714	25938	0
KOS-A_736	240	370.5	19.7	146.5	27.2	44.6	88.7	34.7	191.8	37256	317.9	233.5	93.8	3257	58669	23308	0
KOS-A_737	235.2	406.3	19.1	133	22.9	28.9	80.1	37.9	203.3	35627	392.7	297.2	84.8	3302	55177	22108	0
KOS-A_738	229.3	331.7	16	144.3	26	49.8	102.7	40.2	191.7	34155	431	251.5	87.5	3506	41901	23712	0
KOS-A_739	229.7	371.5	13.9	101.2	22.9	39.5	81	31.8	196.8	32502	336.5	243.7	77.7	3019	71822	18229	0
KOS-A_740	221.8	363.1	14.8	110.9	23.5	32.1	82.5	32.2	192.6	31334	354.4	252.1	75.1	2684	76916	18816	0
KOS-A_741	233.2	386.8	13.8	136.1	23.1	42.5	80.2	23.2	233.7	35961	416.1	247.9	82.7	2944	72681	22525	0
KOS-A_742	230.6	361.1	19	130	24	39.8	75.5	24.4	159.5	31728	338.9	173.6	70.2	2588	54521	19033	0
KOS-A_743	225.5	341.8	17.5	135.8	25.9	45	85.3	39	198.1	33013	390.1	223.7	83	3180	68242	25084	0
KOS-A_744	240.4	412.8	16.7	118.5	23.9	30.9	81.8	35.6	194.2	33386	360.6	244.7	70.4	2823	72527	18867	0
KOS-A_745	241.3	363.3	16.4	142.1	26.5	47.6	85	42.3	199.3	35593	403.1	218.8	82.1	3093	60220	23305	0
KOS-A_746	227.9	364.1	14.6	116.4	23.8	36.7	80.2	32.7	195.7	31510	346.6	255	73.1	2828	68443	19211	0
KOS-A_747	234.4	379	17.7	137	25.5	35.6	78	34.2	221.1	35403	421.5	254.1	84.1	3048	66006	23135	0
KOS-A_748	240.4	380.7	17.8	117.8	26.7	41.1	85.7	37.5	201.3	35333	318.5	237.9	90.9	3128	66395	20069	0
KOS-A_749	232.6	386.1	15.9	126	23.7	50.2	76.2	31.7	181.9	31525	363.5	223.1	82.5	3258	72860	24999	0
KOS-A_750	237.7	364.3	15.7	130.3	24	42.2	78.6	35.4	206.2	34457	360.3	290.5	86.6	3408	54835	22212	0
KOS-A_751	229.3	389.8	19.4	135.3	25.1	39.9	78.3	25.5	190.8	34198	370.7	184.2	76.4	2870	55623	20739	0
KOS-A_752	240.2	340.8	19	143.7	26.2	44.5	86.5	34.7	181.9	33604	490	206.9	83.4	2980	59296	22241	0
KOS-A_753	242.4	389.6	17.8	130.8	22.4	49.9	77	25.1	168.2	31207	318.3	189.4	73.5	2788	61326	20381	0
KOS-A_754	234.1	372.3	14.3	138.3	24.2	45.1	84	31	212.9	35237	403.9	245	80.9	3055	65650	23414	0
KOS-A_755	241.9	395.5	16.5	117.1	24.4	48.8	82.4	33.8	193.3	32463	345.1	222	79.1	3078	69639	21402	0
KOS-A_756	227.9	383.6	17.1	131.2	25	36.2	79.8	31.9	200.6	33233	452.6	227.3	83.2	2947	71457	20530	0
KOS-A_757	233.1	346.4	15.5	131.1	25.2	47.3	98.9	31.3	206.2	34168	418.8	239.7	78.9	3135	50821	21197	0
KOS-A_758	236	383.6	16.1	138.5	22	36.6	84	34.2	212	36587	411.9	279.3	95.5	3513	61639	23844	0
KOS-A_759	236.1	361.3	19.9	133.6	25	38.5	81.6	25.7	164.2	33503	302.1	214.9	87.9	3266	65019	23800	0
KOS-A_760	251.4	390.5	19.5	140.7	24.7	47.4	86.6	26.6	163	35130	361	229.7	91.4	3533	53374	24368	0
KOS-A_761	243.5	363.2	16.2	140.2	26.1	47.4	80.2	26.6	177.2	33435	335.7	215.5	88.3	3109	57013	22747	0
KOS-A_762	246.1	409.8	15.1	110.8	23.8	49.2	80	29.2	187.4	31620	329.1	217.4	76.8	2917	68253	19153	0
KOS-A_763	225.9	350.8	15.2	118.5	24.7	36.4	76.1	28.9	207.2	33713	389.1	266.8	77.7	3361	56814	21560	0
KOS-A_764	231.2	370.8	16.5	121.7	25.2	36.1	78.6	26.6	196.7	31986	369.4	195.8	77.6	2728	61559	19420	0
KOS-A_765	240.8	355.3	16.8	134.5	23.4	45.1	76.8	25.6	167.1	31640	371.8	205.9	76.1	3193	59010	22170	0
KOS-A_766	240.7	367.5	15.8	120.6	23.8	42.5	77	31	187.6	31885	360.1	212.8	71.2	2979	57915	19075	0
KOS-A_767	223.3	380.6	15.6	107.2	23.2	41.5	76.3	28.5	190.5	32461	422.1	225.2	75.7	2903	76910	18644	0
KOS-A_768	218	340.6	13.6	119.6	23.5	37.5	83.1	33	188	31731	343.8	243.9	80.3	2917	67633	20848	0
KOS-A_769	255.9	412.1	15.8	121.3	24.9	42.2	76	27	184.7	31199	333.8	267.7	75.6	2999	74752	20225	0
KOS-A_770	221.5	327.7	12.9	122.8	24.3	40.7	76.8	30.3	191.6	32984	312.4	241.2	87.4	3092	48381	20007	0
KOS-A_771	230	387.4	15.9	127.7	23.9	36.9	73.2	32.8	233.4	35177	435.1	246.8	77.5	2862	73009	21120	0
KOS-A_772	201.8	303.1	8.2	100.3	22.6	37	70.1	27.7	186.5	29968	298.6	225.5	72.8	2684	41452	15689	0
KOS-A_773	232.1	377.3	16.1	142.4	26.7	43.2	78.5	30.9	207.8	35909	399.2	205	78.1	2831	57133	21069	0
KOS-A_774	236.8	372.5	14.9	120.1	24.4	40.7	77	29.1	198.6	32409	351.2	232.7	79.1	3094	60531	20070	0
KOS-A_775	224.6	364.5	15.1	126.9	24.5	40.1	77.5	35.7	186.9	31209	346.2	233.8	82.5	2983	68203	22790	0
KOS-A_776	234.8	386.8	16	132.8	25.2	46.3	78	29.4	188.2	34736	371.3	201.6	78.2	2810	59744	19473	0
KOS-A_777	233.1	360.4	22.7	142.1	25	46.4	86.4	22.8	199	35286	383.4	197.1	86.2	3197	63022	23345	0
KOS-A_778	254.9	383.1	19.5	147.3	26.5	45.6	87.5	36.2	198.7	36358	378.8	247.9	88.4	3311	53958	23609	0
KOS-A_779	216.3	336.7	18	121.6	23.6	33	77.8	31.4	166.2	29748	306	228.2	76.7	2666	81643	20987	0
KOS-A_780	258.7	392.6	17.8	134.3	25.5	45	85.7	30.6	208	35955	398	221.2	76.8	2988	63272	20258	0
KOS-A_781	237.6	369.6	21.2	145.3	27.6	46.5	85.5	21.7	185.6	36188	341.1	188.4	91.1	3304	58129	24444	0
KOS-A_782	245.9	380.2	14.5	114.7	23.6	37	78.3	26.9	200.2	32360	482.3	270.4	73.5	2801	80549	18338	0
KOS-A_783	229.6	341	16.4	126.9	25.5	42.6	75.4	26.4	178.5	32628	313.7	207.8	81.2	3125	56395	21132	0
KOS-A_784	221.4	367.7	16.1	109.7	23.7	32.1	74	26.9	182.7	29625	331.3	176	70.1	2384	61323	16658	0
KOS-A_785	228.5	388	17.3	121.6	23.4	40.4	76.8	25.1	179.8	32703	332.8	216.7	74.2	3049	72699	21808	0
KOS-A_786	221.5	382.6	20.2	131.9	23.1	42.6	78.3	26	163.2	33272	325.2	191.5	84.6	3079	61889	22992	0
KOS-A_787	213.5	312.6	12.1	115.4	24.9	40.2	76	25.3	190.8	32277	312.9	214.4	82.6	2909	43347	18378	0
KOS-A_788	239.7	398.8	17.6	106.5	22.8	41.2	79.2	30.1	208.7	33627	344.7	229.4	72.9	2883	81398	18417	0
KOS-A_789	237.5	326.5	16.7	150.5	29	47.4	88.9	28.3	179.2	34649	447.4	178	76.5	2964	54928	22353	0
KOS-A_790	222.3	345	14.4	123.3	22.7	38.4	84.9	32.5	183.1	32639	352.7	265.5	90.1	3210	63073	21882	0
KOS-A_791	240.6	391.2	20.6	138.1	25.4	47.9	78.9	25.9	179.4	33087	348.4	209.5	76.2	3090	62339	22044	0
KOS-A_792	236.4	370.7	17	131.2	25	40.8	78.3	27.4	185.8	33140	373.5	217.4	81.6	2979	59884	21331	0
KOS-A_793	236.5	392.4	15.5	127.2	23	43.7	80	24	184.1	31824	335.2	203.8	77.5	2843	60669	20809	0
KOS-A_794	236.6	352.7	17.3	139.4	25.6	44.3	84.2	29.1	172.8	33363	345.6	203.4	76.9	2941	51101	22142	0
KOS-A_795	239.1	370.2	18.4	125.1	25.4	39.1	86.2	28.7	195.2	34147	359.9	212.2	91.6	3082	66685	21378	0
KOS-A_796	233.4	383.6	17.2	133.9	23	43.1	84.6	30.4	195.8	33328	349.1	240.7	96.6	3401	71226	24108	0
KOS-A_797	230.6	365.7	18.3	129.8	23.7	40.7	79.4	31.1	166.6	32112	318.7	207.7	90.5	3088	61022	21985	0
KOS-A_798	221.8	356.6	13.4	127.9	24.9	41.9	75.9	32.1	184.8	32430	319.1	225	92.4	3114	56901	21574	0
KOS-A_799	229.4	411.6	16.2	129.1	24.6	31.7	76.6	26.2	184.1	32457	339.5	204.2	74.5	2842	61991	20661	0
KOS-A_800	220.5	366	17.2	121.1	23.4	40.9	76.1	31	166.6	29699	345.7	205.5	76.2	2667	84296	21523	0
KOS-A_801	235.1	377.6	15	133.4	24.5	40.4	75.7	34.6	226.6	34203	485.5	268.9	79	3133	74511	22453	0
KOS-A_802	246.6	375.7	16.9	138	24.2	50.6	82.5	37	185.6	33990	375.8	225.8	84.3	3262	61944	23623	0
KOS-A_803	221.6	351.4	15.7	123.1	23.8	43	81.1	28.3	195.8	33809	359.1	232.4	88	3277	56327	22823	0
KOS-A_804	227.3	360.9	16.2	107.5	23	41.3	79.1	24.7	188.2	32894	343.8	231.9	76.5	3080	61859	19393	0
KOS-A_805	217.3	327.2	11.4	104.8	24.5	38.7	77.1	24	206.6	31943	377.1	242.7	75.5	3238	55648	19933	0
KOS-A_806	232.8	374.5	16.1	143.6	27.4	46.6	79.8	27.8	195.2	35537	366.6	183	80.5	2723	51662	20230	0
KOS-A_807	248	359.9	20.1	145.7	27.2	48.3	87.1	31.8	197.1	36092	377.4	208.9	90.6	3414	58722	24814	0
KOS-A_808	224.8	363.2	14.5	134.8	25.6	45.7	81.6	36.6	190.3	34675	401.1	218.3	90.2	3352	70978	25623	0
KOS-A_809	215.2	324.9	12.8	110.8	25.3	40.5	77.1	27	200.8	32010	379.1	224.1	72.1	3264	58956	21253	0
KOS-A_810	218.3	336	11.9	121.9	23.4	40.9	77.8	27.1	187.8	32900	321.5	232.9	84	3059	49802	20787	0
KOS-A_811	230.8	371.3	19.9	130.9	24.3	36.1	79.4	32.8	202.8	34010	350.3	260.1	84.4	3168	60396	23110	0
KOS-A_812	223.5	361.2	13.9	121.2	23.3	37.6	78.4	23.8	189.1	32311	332.3	212.2	78.5	2841	55261	19978	0
KOS-A_813	244	383.2	19.6	144.8	27.4	40.9	88.7	40.6	196.1	35912	352.5	259.9	99.5	3373	60491	25424	0
KOS-A_814	235.4	373.6	15.5	120	24.3	45.5	83.6	32.4	173.9	33611	356.4	238.2	71.4	3034	63619	20578	0
KOS-A_815	224.7	351.7	12.8	109.6	24.5	43.1	76	25.5	191.6	31690	375.9	225.4	76	3214	62728	20739	0
KOS-A_816	243.5	401.6	16.5	129.7	23	50.8	78.6	25.5	172.2	31054	334.4	198.3	75.6	2805	60090	20386	0
KOS-A_817	238.7	397.1	16.3	140.1	27	48.9	79.3	30.8	172.9	34286	347.4	236.5	77	3234	65355	23589	0
KOS-A_818	217.7	338.4	11.9	100.6	25.3	38.2	76.3	26	200	31757	371	229.8	70.4	3109	62610	19108	0
KOS-A_819	240.2	387.1	14.9	122.4	23.4	49.1	77.2	27.6	191.1	34334	351.3	250.3	88.7	3228	67427	20821	0
KOS-A_820	233.3	350.2	14.5	136.1	25.4	47.3	93.2	38.5	192.5	34677	372	250.1	99.8	3519	52365	24233	0
KOS-A_821	224.1	372.2	13.8	124.5	21.2	35	77.3	35.5	233.9	34759	408.8	272.9	78.1	3042	66400	20947	0
KOS-A_822	237	388.5	17.6	118.4	23.8	36.9	80.5	28.1	187.4	32809	339.3	224.5	77.9	2980	76648	20614	0
KOS-A_823	246.3	384.9	15.5	122.2	24.1	46	81.1	31.3	191	34205	333	260	80.4	3176	70586	20555	0
KOS-A_824	222.4	402.6	14.7	128.2	23.6	29.8	75.7	36.2	204.3	33457	391.4	242.6	78.3	2822	65772	20833	0
KOS-A_825	246.9	413.2	14.7	133.5	22.2	53.6	80	24.5	195	32204	352.1	222.5	79.3	2951	66704	21870	0
KOS-A_826	236.1	403.5	17.2	98.3	23.1	43.2	81.4	25.4	190.2	34595	339.2	254	73.7	3250	80502	19575	0
KOS-A_827	214.7	353.1	13.2	121.8	24	41.6	74.1	29.4	195	30770	424.5	214.7	77.4	3004	75358	22912	0
KOS-A_828	220.7	349.3	12.2	118.2	24.5	41.1	76.5	24.8	218.8	32479	469.2	232.9	72.2	3032	72145	20633	0
KOS-A_829	229.7	373.7	15.5	99.2	23	42	80.4	25.2	198.2	33419	357.3	253.3	77.2	3257	69257	19503	0
KOS-A_830	240.3	410.6	17.2	110.6	24.3	47.5	76	27.2	181.2	32024	328.7	233.2	72.3	3089	74811	19754	0
KOS-A_831	215.6	341.9	13.4	114.7	22.6	42.2	80.2	33.3	187.5	31634	333.4	220.3	90.8	3089	58378	20685	0
KOS-A_832	241.3	372.4	15.9	144.1	26.4	46.1	80.2	29.3	200.4	35368	377	232.6	90.3	3270	59215	23649	0
KOS-A_833	233.5	385.8	15.8	132.5	24.4	41.9	80	25.5	192.8	32970	437.4	222.4	75.1	2913	83579	22055	0
KOS-A_834	219	362.3	14.6	120.1	22.5	38.6	74	28.7	200.4	31159	535.2	219.1	71.5	2678	75933	19237	0
KOS-A_835	241.8	350.6	17.6	139	24.6	44.3	82.7	36.2	174.1	33727	323.3	229.3	95.3	3487	65469	25250	0
KOS-A_836	234.6	342.4	18.1	134.7	25.5	43.2	78.9	38.9	174.7	33287	323.8	226.3	93.1	3308	63589	24004	0
KOS-A_837	221.1	353.1	18.5	129.4	24.2	43.7	81.5	34.7	200.8	32903	374.3	240.1	83.6	3131	67613	23686	0
KOS-A_838	237.4	372.1	16.2	138.1	25.8	42.5	86.1	35.2	195.3	34687	461	248.9	97.3	3311	71257	23474	0
KOS-A_839	230.6	359.8	19.2	136.8	24.2	40.4	77	32	186.8	33508	379.9	208.8	74.5	2937	62878	22660	0
KOS-A_840	222.6	357.1	14.5	125.6	23.7	40.6	74	31	184.7	31209	432	211.5	84.3	2857	67415	19976	0
KOS-A_841	243.3	397.7	15.9	136.4	23.4	45.7	80.7	26.1	187.5	33801	327.3	252.5	85	3249	79036	24152	0
KOS-A_842	233.9	376	19.2	128.3	24.4	45.4	83.1	38.7	200.2	34373	385.7	227.1	84.5	3300	74254	23963	0
KOS-A_843	224.7	361.4	15.5	126.6	24.9	34.6	81.3	31.4	213.7	32361	557.5	260.8	82.8	2936	85225	20430	0
KOS-A_844	236.8	385.3	18.6	116.5	22.8	44.1	79	29.6	216.5	33957	352.3	214.3	78.2	2881	76064	19644	0
KOS-A_845	232.8	366.8	17.5	120.6	23.3	31.1	77.1	23.4	184.3	31124	316.2	213.2	78.3	2807	67554	20496	0
KOS-A_846	246.4	353.3	19	134.3	24.7	44.2	75.6	28.2	170.8	32483	291.2	214.8	81.4	3184	59935	22144	0
KOS-A_847	222.3	338.9	12.4	123.5	24.2	44.9	82.6	30.4	192.4	33346	375.4	214.8	89.5	3204	60226	21952	0
KOS-A_848	228.8	396.9	16	136.2	26.1	39.6	78.8	30.8	188	35749	381.3	235.1	76	3111	65813	22930	0
KOS-A_849	245.1	383.1	16.3	139.2	24	41.3	83.3	33.8	221.6	35832	392.2	283.5	86.1	3414	67208	23974	0
KOS-A_850	248.2	389.6	18.1	121.9	24.4	46	84.9	27.3	195.7	34797	351.2	271.3	82.6	3542	72884	22922	0
KOS-A_851	238.1	384.9	18	127.9	24.3	40.5	81.1	32.3	182.9	33513	355.9	227.4	84.8	3157	67994	21993	0
KOS-A_852	224.9	346.1	13.1	135.3	25.3	42.5	82.8	38.2	180.1	32593	401.1	219	74.3	2924	59298	22018	0
KOS-A_853	230.4	353.4	17.3	131.2	24.6	41.5	78.7	26.5	190.4	32507	466.1	191.2	73.6	2817	64198	20283	0
KOS-A_854	226.6	392.6	14.3	107.2	23.3	35.8	78.5	33.3	211.1	33619	371.4	251	84.3	3050	80577	20768	0
KOS-A_855	235.7	382.7	16.7	110.7	22.7	41.5	79.1	30.1	216.1	33412	351.2	228.1	77.7	2912	74490	19126	0
KOS-A_856	212	363	14.9	119.1	23.1	40.4	77.8	41.8	198.2	30768	330	263.7	86.1	3093	76783	24357	0
KOS-A_857	238	383.3	15.1	139.2	23.5	37.1	81.1	30.5	222.5	36044	399.4	267.4	87	3271	67528	24032	0
KOS-A_858	231	408	15.3	118.3	23.4	29.9	83.7	37.3	201.2	33721	387.5	246.3	86.7	2965	72938	20198	0
KOS-A_859	237.9	381.5	18.6	121.4	24	43.4	79.9	27.4	167.5	33853	324	215	79.8	3081	66417	20934	0
KOS-A_860	227.1	362.2	15.3	125.5	23.2	41.5	76.5	29.6	193.9	32354	518.9	212.8	80	2820	71663	20179	0
KOS-A_861	230.7	416.9	17.6	132.1	24.8	32.1	80.9	24.5	183.9	34129	321.8	227.2	73.3	2961	68013	21431	0
KOS-A_862	238.4	374	17.3	133.3	24.4	39.3	83.6	37.7	190.6	34838	385.9	268.3	82	3165	56615	22090	0
KOS-A_863	224	354.2	14.4	116.4	23.3	44.1	80.7	36.6	208	33143	354.2	227.1	88.5	3051	67630	21008	0
KOS-A_864	250.6	387.6	16.3	138.9	25.2	50.6	79.6	35	196.4	33312	353.6	268.2	86.6	3470	62749	23773	0
KOS-A_865	236.8	356.8	15.7	135.7	25.8	42.3	78	29.1	170.7	32037	365.5	196.8	83	2907	53642	21094	0
KOS-A_866	234.7	400.9	17.1	98.1	23.6	44	81.6	25.9	188.4	34835	364.4	245.3	73.7	3255	83085	19634	0
KOS-A_867	237.6	374.4	17	129	24.2	46.7	86.8	34.8	206.4	34692	365.1	233.2	90.2	3228	65686	22515	0
KOS-A_868	245.1	361.9	20	152.2	27.7	45	89.4	38.7	186.1	36391	319.8	212.1	91.8	3320	53647	23483	0
KOS-A_869	230.5	398.8	19.5	132.9	24.2	41.4	80.5	27.1	175.1	34729	332.7	223.8	78.5	3057	70541	22117	0
KOS-A_870	252.3	360.9	18.4	144.3	22.7	46.1	87.9	29.6	164.7	35511	344.9	269.9	109.9	4136	44609	25472	0
KOS-A_871	232.8	357.1	15.6	129	26.2	42.1	82.6	32.6	191.6	34303	356.9	238.2	90.5	3376	58648	23534	0
KOS-A_872	234.8	413.6	16.5	120.1	22.9	38.9	72.4	27.8	187.3	32901	370	213.9	77.9	2939	69968	19408	0
KOS-A_873	242.4	334.8	16.1	141.8	26.4	42.2	81.4	29.2	172.7	32205	368.4	204.4	86.1	3107	56626	21960	0
KOS-A_874	248.3	355.6	16.4	138.5	23.9	42.4	78.3	26.5	164.4	32805	297.2	231.9	95	3553	64250	24410	0
KOS-A_875	231.1	364.9	19.9	127.9	25.9	33.5	87.8	29	178.1	33797	353.3	208.3	81.2	2866	73464	21513	0
KOS-A_876	239.3	384.2	15.3	131	23.6	44.1	79.7	27.8	226	35180	391.2	250.1	87.2	3174	73643	22921	0
KOS-A_877	223.8	334.5	12.8	115.4	23	39.8	73.3	25.9	176.4	31005	332.1	220.1	72	2899	52058	18298	0
KOS-A_878	237.2	382.4	19.3	134.2	24.3	51.3	81.3	33.6	182.2	33259	361.3	218.6	83.5	3352	68848	25899	0
KOS-A_879	241.1	367.3	16.1	144.3	26.4	45.5	86.3	36.3	177.6	35336	350.8	218.4	98.7	3358	58879	25206	0
KOS-A_880	232.9	384.5	14.7	140.4	25	45.1	81.6	24.6	230.3	36743	411	229.6	83.8	2922	65488	22087	0
KOS-A_881	236.6	363.7	17.6	125.4	25	41.4	81.3	33.1	205.7	34401	477.6	239.9	78.3	3037	72274	21232	0
KOS-A_882	231.1	372.3	15.1	132.1	24.8	41.2	77.3	32.6	214.2	33223	524.3	237.5	80	3011	80126	22159	0
KOS-A_883	240.7	356.7	16.4	147.5	27.1	47.7	87	29.3	179	35773	409.8	194.7	91.2	3305	60428	24727	0
KOS-A_884	239.8	393.7	16.9	140.4	25.9	45.5	83.7	27.7	196.3	35600	363.6	222.9	77.6	3086	71262	22974	0
KOS-A_885	224.7	362.5	17.5	132.2	24.2	42.8	81.7	35.8	189.9	32856	367.5	225	89.8	3319	74065	25870	0
KOS-A_886	242.9	399.3	16.6	131.3	23.2	45.8	79.9	25.2	180.9	31824	325.8	224.9	79	2949	67036	22261	0
KOS-A_887	223.4	338.8	17.7	128.8	24	46.2	83.3	41.5	205.5	33593	377.2	241.1	83.1	3449	62887	24817	0
KOS-A_888	246.9	377.5	17	119.6	23.6	38.5	85.5	31.4	190.2	33741	340.2	243.9	100.7	3423	77528	22155	0
KOS-A_889	245.9	384.9	20	136.2	25.6	45.4	82.8	22.1	170.2	33733	338	194.9	80.8	3088	58483	23109	0
KOS-A_890	217.9	349.7	12.5	118	23.7	42.3	79.2	31.4	198.8	32558	341	216	86.7	2958	56201	19832	0
KOS-A_891	220.3	359.2	12.7	119.5	23.1	35.8	74.8	34.3	224.9	33578	414.8	258.8	83.6	2998	66758	21033	0
KOS-A_892	238	395.8	16.2	136.3	24.3	38.5	83.2	31.2	192.6	34684	379.6	246.3	82.9	3287	65339	23564	0
KOS-A_893	233.9	353.3	16.7	134.6	23.6	41.3	79.6	30.7	165.1	32111	299.6	209.2	86.2	3277	62129	23672	0
KOS-A_894	242.4	373.6	20.5	129.8	26	39.7	91.2	29.1	196.7	36210	390.8	219.6	91.9	3231	66257	21926	0
KOS-A_895	231.1	402.4	19.3	134.3	24.9	40.7	79.7	25.9	181.2	35005	341.1	216.4	73.4	2937	69474	21258	0
KOS-A_896	231.2	375.1	16.1	130.5	24.4	30.8	74.5	29.8	213.9	33664	411	249.1	79.6	2879	70375	22173	0
KOS-A_897	237.5	383.5	17.2	124.5	23.7	45	80	31.9	207.6	34086	375.6	221.1	86.8	3052	75063	21685	0
KOS-A_898	231	358.1	14.3	130.2	22.9	47.5	80.2	28.8	194.3	34142	338.3	257.7	89	3414	57467	23270	0
KOS-A_899	234.9	352.9	16.7	131.3	24.3	41.6	88.4	29.7	180.2	34897	350.4	236.6	94.6	3466	49878	22670	0
KOS-A_900	231.4	359.5	17.1	133.3	26.2	40.3	84.1	39.6	197.6	34167	343.3	260.9	93.3	3210	57990	23490	0
KOS-A_901	239.4	396.8	15.5	114.6	25.6	44.1	76.7	32	193.6	31253	397.4	233.2	77.2	2973	74319	19387	0
KOS-A_902	235.1	411.2	15.2	128	24.6	29.5	77.2	28.4	212.6	34458	387.4	264.1	75.2	2945	71904	21217	0
KOS-A_903	234.7	359.5	18.4	147.1	27.4	46.2	87.4	42.4	196.2	36638	352.9	221.1	97.8	3214	57958	23888	0
KOS-A_904	226.3	349.2	18.3	133.3	23.9	39	79.1	30	161.1	32034	339.8	204.4	73.5	2718	63403	21105	0
KOS-A_905	234.8	356	14.2	125.3	26	46.5	93.2	39.1	192.6	33841	397.9	249.1	80.5	3223	53758	21291	0
KOS-A_906	230.2	371	14.8	121.5	25	44.2	74.2	27.2	181.3	30225	343.3	226.3	72.1	3026	64997	20965	0
KOS-A_907	238.5	392.7	16.7	129.4	24.7	48.4	72.8	32.3	175.4	29681	310.7	228.1	79	3082	67788	22520	0
KOS-A_908	236.9	368.8	16.8	120.6	24.9	37.1	86.1	28.9	187.2	34036	340.2	222.8	78.1	3019	62998	20108	0
KOS-A_909	250.6	370.5	15.5	144.5	25.6	57	82.9	29	183.4	35864	332	259.2	95	3467	62560	24759	0
KOS-A_910	240.1	353.1	17.1	133.6	24.9	41.5	75.1	28.4	161.8	31240	299.1	206.4	86	3079	61027	22035	0
KOS-A_911	247.1	376.6	17.4	143.3	26	45.3	84.5	34.7	172.1	35249	321.7	226.9	104.3	3460	59361	25430	0
KOS-A_912	210.9	329.5	11.2	112.5	23.1	39.4	73.7	32.7	194.1	30904	319.8	252.6	81.8	2994	57205	20412	0
KOS-A_913	248.3	362.1	18.1	139.5	25.1	53.2	83.9	31.8	175.4	32158	457.2	204.5	83.5	3054	62963	22791	0
KOS-A_914	243.3	370	17.5	135.3	24.8	41.9	83.1	27.5	203.5	33540	415.6	259.1	83.4	3333	73168	23875	0
KOS-A_915	226.7	365.2	12.6	91.4	25.4	38.2	77.2	30.1	204.6	32002	357.5	228.1	71.5	2971	66252	17102	0
KOS-A_916	236.8	384.7	17	136.1	25.5	42.5	80.7	37.1	195.3	34520	388.3	208.6	79.3	2983	61119	22154	0
KOS-A_917	213.8	336.5	10.5	111.2	22.5	39.8	73.6	25.8	209.8	32447	340.2	237.7	78.3	2806	55698	18223	0
KOS-A_918	208.2	325.3	12.5	113.6	23.3	39.7	74.9	32	179.2	31499	320.9	217.2	82.5	2876	48845	18972	0
KOS-A_919	240.3	370.5	20	140.1	25.3	43.2	81.1	32.5	170.2	33491	338.2	215.4	84	3022	57326	22809	0
KOS-A_920	228.4	348.9	17.2	127.2	24	44.5	83.7	24.1	206.1	34440	373.7	233.1	86.5	3243	56145	22119	0
KOS-A_921	238	390.6	16.6	134.1	22.2	42.1	77.7	28.2	192.5	33068	360	218.6	73.8	2809	63582	20899	0
KOS-A_922	224.1	353.8	13.2	107.2	22.5	41.1	78.7	26.8	213.3	32981	377	250.7	86.9	3206	57057	19641	0
KOS-A_923	224.7	364.6	15.7	124.2	23.8	36.1	80.8	29.2	192.6	32594	338.8	214.8	82.3	2928	57271	20702	0
KOS-A_924	229.8	333.5	14.4	128.2	24.3	44.7	81.1	28.9	182.6	31962	379.3	206	81.9	3082	56778	21159	0
KOS-A_925	238.4	339.2	20.4	133.3	23.9	41.7	73.2	26.1	145.6	31154	259.8	194.8	82	3070	57073	21588	0
KOS-A_926	234	369.2	18.5	132.8	24.4	31.4	81.8	25.5	196.6	33824	324.5	244.4	87.7	3032	68927	23506	0
KOS-A_927	252.3	403.2	18	116.5	24.4	46.7	81.6	26.3	200.4	35429	368.9	232.5	64.8	3005	69514	18840	0
KOS-A_928	225.8	347.2	14.8	132.1	25.2	43.8	77.8	28	183.5	31529	397.1	201.7	77.4	3083	67191	23333	0
KOS-A_929	230.8	353.8	16.8	138.6	27.1	44.6	87	47.2	197.3	35404	395.6	240.4	96	3319	63442	25180	0
KOS-A_930	228	363.8	18.1	133.3	23.7	44	80.8	33.3	184.7	32820	370.3	224.7	86.6	3372	73839	25817	0
KOS-A_931	240.2	355.3	20.3	145.4	29	46.2	87.5	25.5	201.7	36004	403.8	183.8	95.4	3214	58626	23454	0
KOS-A_932	233.4	371.2	15.1	137.4	25.6	43.7	78.3	32.5	189.9	33598	343.4	235.3	96.3	3324	62038	23776	0
KOS-A_933	243.8	382	16.6	117.4	24.3	39.7	86.7	36.6	201.9	34612	387.7	245	98.4	3297	77158	21367	0
KOS-A_934	231.7	367.2	14.2	143.1	26.2	47.4	93	33.7	210.3	36696	424.8	266.6	85.3	3401	59731	24352	0
KOS-A_935	229.9	378.5	14.5	125.4	23.4	43.5	78	27.5	231.6	33496	488.6	233.9	76.5	2870	83617	20881	0
KOS-A_936	225.4	368.6	15.8	128.1	21.9	42	79.2	29.8	182.1	32921	439.8	244.4	95	3395	70465	23436	0
KOS-A_937	235.1	377.9	20.5	142.3	26.2	39.3	86.2	23.4	191.9	35276	370.8	205.8	78.2	3085	56084	22181	0
KOS-A_938	233.7	382.7	16.8	125.2	24.1	38.5	79.7	25	193.1	33194	446.5	252.9	79.4	3031	78241	20747	0
KOS-A_939	233	364.3	14.8	134.7	25.4	43.5	78.8	31.9	192.9	33020	372.7	232.2	84.1	3361	67588	24681	0
KOS-A_940	230.2	371	16	130.5	24.4	42.8	77.7	25.1	200	31895	464	211.7	74.6	2852	81275	21372	0
KOS-A_941	247.3	361.6	17.3	136.8	24	46.9	79.4	30.9	180.9	33699	384.1	222.5	77.8	3325	59447	23058	0
KOS-A_942	252.8	417.2	16.4	120.9	22.9	47.4	80.9	28.8	181.2	31578	330.3	221.1	70.4	2863	71416	19266	0
KOS-A_943	243.2	374.4	19	125.6	24.9	39.8	81.1	22.9	197.2	33596	332	215.7	80	2919	65902	20666	0
KOS-A_944	231.7	381.3	15.2	118.7	25	38.7	83.6	36.2	194.4	33419	360.9	225.6	99.5	3104	72463	20746	0
KOS-A_945	221	385.7	15.8	125	22.7	39.1	79.5	27.2	200.8	31850	394.2	228.5	91	3086	89493	23280	0
KOS-A_946	225.8	365.1	15.8	115.3	24.1	39.7	76.8	23	184.6	32693	345.6	217.1	70.6	3093	64527	20356	0
KOS-A_947	241.5	371.7	20.5	138.8	26.7	39.9	86.1	24.3	169.9	35419	352.2	200	77.9	3009	53085	21698	0
KOS-A_948	236.8	350.5	13.2	121.8	25.7	42.2	91.5	32.3	203.5	33468	408.7	281.8	79.9	3365	58268	21201	0
KOS-A_949	232.6	376.4	18.1	120.2	22.8	36.6	78.9	26.2	211.8	33943	448.9	245.9	72.5	2792	65464	19035	0
KOS-A_950	233.7	380.2	15.4	122	24.5	40.6	82.4	32.9	205.2	32761	514.4	251.6	88.5	3074	83659	20593	0
KOS-A_951	246.4	411.5	14.7	114.1	23.5	30.9	81.2	27.6	199.7	33223	364.8	276.6	72.3	2784	74657	18521	0
KOS-A_952	249.5	351.8	16	135.5	23.9	41.1	79.1	31.8	164.7	32373	301	260.5	100.8	3614	56800	23086	0
KOS-A_953	231.7	378.2	15	133.3	24.1	35.4	82.8	41.3	227	36236	423.5	266.7	85.2	3060	72294	22896	0
KOS-A_954	253.2	395.2	17.5	125	24.8	46.7	81.4	27.2	201.6	35402	376	239.2	71.5	3139	67199	20526	0
KOS-A_955	222	346.5	14	119.3	22.2	42.2	74	30.2	188.7	31034	330.9	242.6	83.7	3362	66888	23078	0
KOS-A_956	239.2	370.9	17.2	139.8	26.5	46	83.1	32.8	191.9	34855	360.2	189.9	76.4	2999	58365	21378	0
KOS-A_957	236.6	396.8	13.6	129.3	22.8	42.6	78.1	25.2	227.7	35457	408.9	253.2	85	3024	75712	21511	0
KOS-A_958	225.1	360	17.4	126.8	24.5	39.3	80.8	35.1	185.4	32272	316.3	244.6	84.5	3151	69453	24016	0
KOS-A_959	228.1	351.1	14.2	136.4	24.8	48.7	88.9	33.5	194	35303	421.1	237.7	88.4	3570	57037	24435	0
KOS-A_960	235.6	397.5	15.3	134.5	24	34.2	79.6	33.7	197.7	33838	382.5	255.7	83.5	3170	64301	22863	0
KOS-A_961	225	338.4	15.8	133.2	24.3	46.1	89.3	33.3	203.8	33126	538.3	233.2	78.9	3096	58766	21067	0
KOS-A_962	249.8	371.1	20.1	142.8	25.9	42.8	87	28.7	178.1	35985	367.9	214.8	79.8	3261	56496	23510	0
KOS-A_963	238.7	398.4	15.6	132.2	22.3	38.9	77.5	26.4	176.3	32604	300	237.8	83.4	3125	76677	23027	0
KOS-A_964	238.1	377.7	18.8	146	25.1	38.4	86.1	37.7	215.9	37288	342	251.1	94.9	3182	63501	23113	0
KOS-A_965	237.9	390.7	15.4	123.3	23.2	45	77.1	31.8	176.1	33213	373.2	223.5	76	2921	66014	19280	0
KOS-A_966	239.8	385.6	17.3	127.6	24.2	43.5	83.3	31.4	195.2	34618	361.8	248.1	92.2	3364	70055	22826	0
KOS-A_967	246.7	362.9	20.6	149.2	26.3	45.7	87.2	38.1	190.5	36577	312.6	232.7	98.4	3389	56054	23848	0
KOS-A_968	235.8	402.4	15.6	136.3	24.3	37.8	81.2	31.1	191.7	35056	395.5	220.2	76.4	3033	63635	22205	0
KOS-A_969	245.9	387.4	16.6	137.3	24.8	42.3	77.4	32.5	220.7	35228	419.8	241.3	70.1	2897	64085	21395	0
KOS-A_970	243.4	378.5	17.9	120.8	25.2	37.5	85.8	28.1	198.8	34155	360.9	229.5	91.3	3085	71209	20835	0
KOS-A_971	252.1	402.2	15.2	137.9	23.5	59.2	80.8	26.2	175.9	32893	310	236.2	87.1	3198	63280	23100	0
KOS-A_972	227.3	351.3	15.9	120	23.3	42.6	81	33.8	205.3	33251	363.5	251.5	82.6	3140	58150	20871	0
KOS-A_973	243.7	391.3	18.7	137.3	26.1	43.4	80.1	33.9	187	32555	337	241.4	86.6	3148	64517	23530	0
KOS-A_974	236.4	381.2	15.8	121.5	24.5	36.3	81.5	30.6	199.6	32775	476.3	267	82.4	2970	81349	19792	0
KOS-A_975	232.3	403.2	19.1	124.5	23.4	40.5	78.4	27	190.9	34469	343	222	74.4	2939	75916	20544	0
KOS-A_976	219.9	346.4	16.1	132.3	25.1	40	79.2	34.2	171.9	32049	355.7	201.6	76	2779	65154	21653	0
KOS-A_977	235	374	16.2	125.6	23	50.3	75.3	29.6	174.6	32306	361.3	230.2	81.9	3183	58779	21930	0
KOS-A_978	232.1	382.6	15.7	137.3	25.6	46.1	79.9	27.1	215.9	35947	379.1	205.4	81.5	2801	61935	20761	0
KOS-A_979	224.9	388.5	17.6	127.8	23.4	36.6	82.4	25.4	194.4	32500	338.7	227	78.3	2819	84692	21842	0
KOS-A_980	237.3	340.8	25	149.4	26.7	49.4	89.6	25.3	197	37024	411.2	191.8	84.2	3258	48927	23213	0
KOS-A_981	236.6	384.6	16.7	138.5	25	38.2	77.9	34.7	216	36169	425.1	254.8	89.4	3190	67058	23873	0
KOS-A_982	242.4	360.8	21.3	152.1	27.3	44.5	90.5	39.8	195.6	37406	287.4	234	106	3372	54080	23738	0
KOS-A_983	227.2	341.9	16.6	125	23.6	41.9	78.4	24.7	179.8	32606	349.2	212.3	80.1	2995	49690	20527	0
KOS-A_984	231.2	370.7	16.3	118	23.8	39.8	82.5	24.6	214.5	32996	464.3	224.5	74.4	2700	77162	18460	0
KOS-A_985	221.5	364.1	13.9	128.7	25	43.6	79.7	30.2	187.5	33830	350.5	212.1	93.5	3233	59649	22775	0
KOS-A_986	246.9	368	20.3	147.8	28	40.4	91	29.1	172	36103	352	190.5	76	3187	53089	23185	0
KOS-A_987	233	346.4	17.6	128.5	25.8	41.3	81	22	191.9	33204	345.2	209	79.2	3180	55887	22097	0
KOS-A_988	250.4	359	19.1	135.5	22.4	42.1	76.7	21.8	154	31912	263.1	215.2	86.9	3403	63880	23197	0
KOS-A_989	245.2	367.1	20.1	152.5	26.2	46.5	89.8	36.1	185.8	37443	331.1	240.7	106.1	3585	47525	24022	0
KOS-A_990	243.6	345	16.1	134.3	24.9	42.3	79.1	30.3	180.6	32159	336.4	221.9	88.9	3161	62479	21739	0
KOS-A_991	227.2	361.1	17.8	127.9	23.6	39.5	79.8	32.2	186.4	31518	352.4	211.7	78.4	2824	80523	21798	0
KOS-A_992	227.1	353.8	13.1	132.4	24.2	47.5	92.7	35.7	198.2	33427	382.3	257.9	88.8	3344	60002	23102	0
KOS-A_993	253.1	410.5	16.6	116.8	23.8	42.3	81.8	30.5	187.2	32978	335.4	238.3	70.2	2905	75891	18621	0
KOS-A_994	238.9	380.1	17.3	144.4	26.5	44.8	86.1	33.3	191.1	36728	394.8	230.3	94.2	3459	65682	25935	0
KOS-A_995	244.2	364	21.9	153.7	27.5	44.6	90.9	39.9	195.1	37737	285.8	234.3	106.2	3385	54530	23876	0
KOS-A_996	231.7	377.6	21.4	139.5	24.9	39.2	84	27.4	194.2	35148	392	205.3	77.8	3023	54181	21621	0
KOS-A_997	241.5	390.5	19	135.1	23.8	42.8	85.6	30	174.2	35889	360.9	253.5	92.6	3594	57760	22971	0
KOS-A_998	236	366.9	18	125.4	25.3	39.6	83.8	27.5	200.7	33392	410.6	209.1	86.8	3012	71446	21103	0
KOS-A_999	233.5	356.1	14.7	131.8	25	40.1	75.7	28.9	180.5	31084	439.6	194.4	77.9	2754	60605	20067	0
KOS-A_1000	234.2	352.9	14.6	140.6	26.3	43.3	82.1	34.3	194.2	34068	373.7	226.4	87	3299	60719	24477	0
KOS-B_1	173.5	256.3	9.2	86	15.5	30.2	70.7	29.9	386.8	34015	567.3	386.9	71.6	2545	97033	17609	1
KOS-B_2	184.8	271	9.5	88.6	16.1	33.3	81.3	21.9	371.8	35304	601.9	389.6	68.7	2552	103424	18450	1
KOS-B_3	191.8	266.7	11.4	102.2	19.5	37.3	83.8	24.4	406.8	36916	700.3	335.7	65.1	2215	107542	18382	1
KOS-B_4	183.1	262.4	9.3	98.4	19	39.2	78.8	34.6	393.7	35783	686.8	370.5	70.9	2421	100592	19227	1
KOS-B_5	186.3	267.3	9.9	98.6	19.3	39.6	84.1	26.9	414.8	36420	743.2	345.3	68	2310	109970	18890	1
KOS-B_6	170.1	252.8	8.1	98.7	18	34.8	77.7	23.4	395.1	34386	703.4	292.5	51	1920	96991	16281	1
KOS-B_7	178.1	257.8	7.7	94.6	18.4	36.7	75.4	27.4	392	33453	694.9	316.1	51.6	1868	95725	16079	1
KOS-B_8	174.1	248.7	9.3	96.2	17.6	32.3	73.7	26.9	388.4	33676	659	305.7	50	1869	91656	15482	1
KOS-B_9	199	269.5	10.1	102.8	20.6	32.2	79.2	16.5	370.2	36572	585.8	371.5	63.5	2259	107212	18332	1
KOS-B_10	185.5	267.4	11.3	102.3	19.9	38.6	86.4	26.1	425.4	36779	764.2	319.2	66.3	2225	110502	18823	1
KOS-B_11	173.7	257.1	8.4	100.7	19.2	35.4	77.4	28.7	405.1	34866	730.9	307.4	57.1	2089	104692	17506	1
KOS-B_12	186.6	258.4	8.7	99.2	19.7	41.4	82.7	33.5	396.4	36760	696.8	386.4	62.8	2464	94910	19497	1
KOS-B_13	188.9	259.8	8.9	93.8	17.9	40.1	82.6	32.1	388.4	36408	640	399.5	64.8	2541	94562	19269	1
KOS-B_14	184.5	265	8.5	101.5	18.7	36	81.5	24.1	394.1	36029	673.5	321.5	58.3	2113	104658	17745	1
KOS-B_15	176	250.6	8.6	97.2	17.4	33.3	78.1	26.7	396	34674	647.3	333.4	56	2068	101835	16878	1
KOS-B_16	177.4	246.3	11.3	97.8	16.9	29.8	74.7	29.2	390.6	34598	622.5	314.8	53.6	1997	92415	15873	1
KOS-B_17	184.9	265.3	9.9	90.6	16.7	35.3	83.7	27	397.8	35415	621.3	366.6	69.8	2470	105433	18796	1
KOS-B_18	185.2	252	11.4	98.8	17.5	30.4	75.1	34.3	390.1	34846	596.6	361.7	58.7	2171	101330	17553	1
KOS-B_19	195.8	265.5	10.8	97.4	19	31.7	80.4	24	389	36324	599.1	387.2	61	2416	105751	18779	1
KOS-B_20	177.6	254.6	8.7	90.7	15.8	30.9	74.9	30.3	388.8	34542	574	379.3	65.8	2396	101701	17592	1
KOS-B_21	180.6	269.6	9.2	90.6	16.8	31.9	78.9	18.9	364.8	34972	625	378.7	64.1	2451	101584	17826	1
KOS-B_22	174.7	251.5	8.6	91.8	16.2	31.1	74.2	29	389.5	34241	592.3	362.3	62.3	2282	99657	17118	1
KOS-B_23	190.3	269.1	9.2	94.9	17.8	35.5	85.1	25.8	410.2	36706	673.8	346.3	57.1	2373	102769	18384	1
KOS-B_24	192.4	267.3	10	95.3	18.2	33.7	81.4	21.7	381.4	35919	590	374.8	67.2	2389	105565	18542	1
KOS-B_25	178.7	259.1	8.2	92.7	17.9	34	75.2	29.7	394.4	34721	659.2	374.5	67	2393	103948	18147	1
KOS-B_26	190.4	266.2	9.9	90.5	16.7	34.5	82.2	24	382.5	35565	573.2	383.3	69.6	2477	103982	18609	1
KOS-B_27	180.6	265.1	8.5	101.3	19.3	37.2	80.3	33.3	414	35823	734.8	325.7	64.2	2288	111695	18861	1
KOS-B_28	189.5	262.3	11.3	94.9	18.3	30.1	74.7	24.1	374.2	35069	579.1	378.6	69.4	2314	98938	17636	1
KOS-B_29	179.4	263.5	7.5	98.7	18.1	38.7	80.5	30	405	34957	721.4	304	54.5	1966	101653	17095	1
KOS-B_30	187.1	264	10.3	95.4	18.7	35.5	83.2	22.1	408.1	36159	696	341.1	57.6	2282	101491	17921	1
KOS-B_31	185.1	262.1	8.6	93	18.4	35	78.6	24.3	396.8	34705	675.8	336.1	52.1	2097	96305	16807	1
KOS-B_32	186.3	256.3	9.9	100.7	19	31.1	74.7	27.9	386.3	35451	634.3	352.7	59.6	2165	101559	17308	1
KOS-B_33	172	247	9.3	98.4	18.4	32.8	74.5	25.8	385.5	34012	660.1	332.1	53	2023	96657	16801	1
KOS-B_34	185.1	256.1	8.5	103.7	20.3	48	83.5	37.4	396.1	37249	749.6	382.3	66.7	2391	94186	19863	1
KOS-B_35	190.3	264	10	91.3	18	32.3	82.1	21.3	401	36038	641.1	363.1	54.2	2400	97767	17823	1
KOS-B_36	193.2	270.5	9.9	94.1	18.4	32.1	80.9	18.9	378.5	36186	608.2	381.9	61.9	2448	103090	18313	1
KOS-B_37	181.7	258.6	7	102.3	18.9	45.3	82.4	38	396.2	36488	727.7	353.6	60.9	2248	95145	18939	1
KOS-B_38	192.9	269	10.5	94.6	18.8	36.1	85.2	22.9	412.6	36762	692.7	354.9	59.6	2388	103385	18489	1
KOS-B_39	187.4	257.7	11.7	97.8	17.3	29.8	76.8	32.3	383.1	35349	579.6	390.8	63.8	2385	105955	18579	1
KOS-B_40	180.4	252.7	7.1	100.2	19.7	44.6	78.4	36.9	385.8	35473	718.2	368.6	59.2	2194	89328	18396	1
KOS-B_41	172.3	255.9	8.9	93.9	17.5	31.9	75.8	19.7	375.6	34047	655.6	334.6	55.3	2125	96614	16556	1
KOS-B_42	186.2	262.6	10.1	88.6	15.6	34.4	82.2	28.3	389.7	35237	580	374.7	69.3	2478	102017	18384	1
KOS-B_43	179.5	262.7	7.4	98.7	17.7	38.2	81.3	30.5	406	35193	708.4	307.9	55.4	2006	102850	17218	1
KOS-B_44	182.2	259.7	9.6	100.7	16.6	35	81.5	33.9	406.8	36080	666.5	308.2	57.7	2105	101108	17333	1
KOS-B_45	196	270.1	10.4	102.6	20.4	35.8	82	19.3	388.5	36771	655.2	353.8	64.5	2229	108386	18470	1
KOS-B_46	183.2	258.7	10	91.7	17.1	31	75.1	28.5	383.1	34448	584	391.7	71.2	2365	102068	17909	1
KOS-B_47	180.9	259.6	10.6	96.6	18.2	31.8	77.6	30.7	401.2	35151	633.5	373.1	67.6	2411	107624	18855	1
KOS-B_48	186.7	250.1	12.3	97.5	16.6	28.2	75.7	33.7	390.9	35328	572.2	354.8	57.7	2214	96611	17042	1
KOS-B_49	180.9	261.9	8.2	102.4	21	37.9	77.9	29.6	413.5	35789	787.9	346.3	63.6	2206	110797	18525	1
KOS-B_50	179.7	261	10.9	101.1	19.5	33	82.5	27.5	416.9	35688	711.6	319.8	62.8	2205	106883	18273	1
KOS-B_51	171.1	251.6	7.7	95.4	18.5	35.1	74	23.7	389.2	33124	704.3	296.6	47.8	1781	92495	15388	1
KOS-B_52	183.9	266.9	10.4	92.2	17.8	33.9	77.7	28.3	391.4	34922	637.7	370.4	74.3	2437	103811	18585	1
KOS-B_53	177.6	261.3	7.9	100.2	19.6	35.7	76.2	32.8	409	35305	734.9	339.7	63.7	2276	109365	18454	1
KOS-B_54	181.4	267.9	10	102.9	19.8	37.4	84.7	29.8	424.7	36315	756.1	310.7	65.2	2263	113042	19117	1
KOS-B_55	168.3	244.1	7.9	98.5	18.8	37	74.8	26.2	381.7	34139	695.8	323.8	51.4	1986	88605	16506	1
KOS-B_56	185.1	250.6	9.3	102.6	19.4	40.6	78.1	40.1	382.4	36145	649.7	412.7	64.7	2434	97373	19875	1
KOS-B_57	181.7	264.7	8.8	98.8	17.2	36.4	81.4	33.1	406.7	35959	669.1	340.7	63.7	2293	107504	18608	1
KOS-B_58	185.9	266.1	11.1	91.5	17.7	30.8	75.5	26	373.9	34711	593.6	407.6	73.8	2504	103449	18667	1
KOS-B_59	173.7	255.6	8.2	96.6	19	35.5	76.4	24.6	397.2	33701	716.4	302	51.5	1874	96646	16160	1
KOS-B_60	171.3	253.4	8.3	99	18	34.9	78	25.1	396.7	34518	699.4	299.5	52.2	1959	98528	16596	1
KOS-B_61	182	263.6	8.9	98.9	19.7	39.6	80.5	26.5	410.1	35166	761.2	314.7	58.3	2001	103406	17335	1
KOS-B_62	181.4	269.8	8.3	103.2	18.3	39.6	85.2	34	421.4	36601	744.6	298.2	62	2211	111705	18845	1
KOS-B_63	194	264.1	11	94.1	18.2	31.6	81.5	26.8	399.9	36253	612.8	390.9	59.2	2494	104237	18901	1
KOS-B_64	188.2	256	9.9	99.3	17.7	31.2	78.1	31	388.4	35498	575.5	387.3	62.5	2304	109465	18531	1
KOS-B_65	183.4	253.2	6.7	104.2	19.7	49.5	82.4	43.7	386.1	37266	723.5	396.1	65.1	2440	89196	20130	1
KOS-B_66	180.5	262.1	8.5	102.1	20.9	34.6	78.2	26.9	407.2	35507	740.6	343.7	62.7	2216	109711	18456	1
KOS-B_67	178.6	257.9	9.5	94.5	16.1	32.8	76.8	32.3	398	35191	622.5	341.5	63.5	2288	99147	17411	1
KOS-B_68	177.5	262.1	7.8	95.3	17.4	36.8	78.2	29.8	401.2	34749	686.5	321.5	58.8	2108	100193	17170	1
KOS-B_69	186.8	260.9	8.2	101.3	20.2	33.3	75.9	25.3	387.2	35595	662.1	366.5	61.5	2218	107771	18061	1
KOS-B_70	184.6	253.8	11.3	93.4	15.6	30.8	78.1	31.8	389.5	35158	573.1	350.1	62.1	2265	96253	17087	1
KOS-B_71	180.8	257.1	7.6	95.7	18.9	39.1	77.1	29.5	391	34425	701.4	336.8	53	2020	92497	16884	1
KOS-B_72	185.7	252.1	12.1	100	17.2	29.7	76.1	35.9	394.2	35378	592	356.3	60.5	2236	102414	17792	1
KOS-B_73	170.2	245.1	9.8	96.2	17.5	30.4	73	24	384.5	33657	646.9	307.6	51.2	1922	91048	15516	1
KOS-B_74	182.6	269.5	9.5	102.6	19.3	39.2	87.1	28.1	425.3	36711	764.7	308.6	63.9	2202	111144	18868	1
KOS-B_75	178.1	252.9	6.9	99.7	19.9	40.2	74.6	36.9	390.1	35534	716.5	389.8	65	2380	97312	18886	1
KOS-B_76	193.2	259.6	9.3	102.8	20	37.8	78.8	28	371.6	36667	617.8	387.7	63.7	2329	97297	18769	1
KOS-B_77	181.4	268.6	9.2	103.6	19.1	38.2	83.1	35	422.3	36328	744	302.9	64.4	2285	114224	19201	1
KOS-B_78	192.3	262.7	10.3	100.9	19.5	32.5	77.4	25.4	380.5	35566	603.2	375.3	61.5	2229	107009	18364	1
KOS-B_79	189.9	267.1	10.7	91	18.3	32.1	80.6	23	398	35720	638	377.9	64.5	2469	100315	18362	1
KOS-B_80	182.4	261.6	8.5	92.4	17.8	35.2	78.5	28.7	393.8	35006	655.8	375.7	67.5	2403	105194	18437	1
KOS-B_81	186.7	270.4	10.4	90.7	17.7	31.4	76.5	20.6	366.7	34948	599	397.2	72.5	2487	101554	18230	1
KOS-B_82	181.2	270	9.5	97.1	18.4	34.6	83.4	24	398.6	35819	695.9	344.4	64.9	2354	107851	18613	1
KOS-B_83	172	255.5	9.4	96.7	18.6	32.8	77.6	24.1	402.1	34474	691.4	321.1	59.5	2144	100879	17280	1
KOS-B_84	180.8	255.1	8.5	94.5	17.8	37.7	75	33.6	379.7	35483	616.4	400.4	69	2507	93565	18721	1
KOS-B_85	193.5	263.8	10.9	102.5	19.5	32.2	78.6	27.9	385.5	36109	599.7	383.3	64.8	2347	111348	19190	1
KOS-B_86	192.8	267.2	10	93.8	17.7	34	81.5	22	379.5	35865	578.2	379.9	68	2418	104911	18543	1
KOS-B_87	185.3	250.1	12.2	96.4	16.1	28.9	75.9	34.1	388.4	35115	563.4	355.8	60.3	2226	96976	17088	1
KOS-B_88	178.4	256.9	7.3	99.5	20.6	36.7	73	32.5	394	34972	737.8	377.7	65.4	2288	103167	18425	1
KOS-B_89	177.7	260.5	7.5	100.7	20	36.7	76.2	31.6	407.2	34886	753.2	326.2	58.9	2111	106920	17807	1
KOS-B_90	179.3	256.2	8.7	98.8	19.2	40.1	79.6	34.7	395.9	35949	690.4	378.5	67.5	2436	96783	19258	1
KOS-B_91	182.5	269.6	8.6	97.3	16.9	36.2	83.2	27.9	395	36102	677	334.8	62	2289	105064	18134	1
KOS-B_92	180.8	265.3	10.4	98.1	19.1	36.1	82.6	26.4	417.2	35926	721	336.2	68	2324	108322	18710	1
KOS-B_93	178.5	256.4	10.1	90.5	16.4	30.2	72.5	31.9	388	34451	569.3	395.9	70.1	2519	102026	18302	1
KOS-B_94	193.1	266.6	9.9	99.2	19.5	31.9	77.6	19.6	375.2	36020	586.5	373.2	65.2	2318	105201	18198	1
KOS-B_95	191.4	256.7	11.8	100.8	18.2	29.7	76.4	30	382.8	35694	570	376.6	61.9	2272	104580	18162	1
KOS-B_96	176.4	253.4	8.9	92.3	16.6	33.3	78.3	24.9	387.8	34317	619.8	343.7	59.1	2186	98757	17042	1
KOS-B_97	183.4	260.7	9.6	99.8	16.8	34.9	81.9	32.8	406.9	36148	665.3	314.1	57.6	2143	101118	17453	1
KOS-B_98	185.8	267.9	11.5	90.7	18.5	33.5	76	24.5	385.9	34743	641.7	389.1	79.2	2438	100939	18397	1
KOS-B_99	182.3	248.5	12.3	98.6	16.6	28.3	75.8	33.3	395.4	35153	598.1	326.4	57.3	2103	94538	16421	1
KOS-B_100	179.7	264.9	8.6	100.5	18.9	37.8	80.3	32.4	412.5	35310	731.6	304.3	59.8	2131	107605	18054	1
KOS-B_101	184	250.9	11.3	98.2	17.2	30.2	74.7	33.8	389.9	34716	599.3	349.5	57.1	2113	98324	17002	1
KOS-B_102	178.1	263	8.9	96.6	17.9	35.5	77.8	32.1	406.4	35112	682.4	330	64.4	2293	105636	18149	1
KOS-B_103	180.4	268.9	8.7	101.9	18.7	38	86.1	29.1	419.9	36400	743.3	307.6	62.1	2197	109821	18668	1
KOS-B_104	187.5	263.4	8.9	93.5	18.6	34.5	79.2	23.4	395.2	35061	663.1	343.6	53.4	2155	97485	17091	1
KOS-B_105	193.1	268.5	9.8	92.5	17.9	33.8	84.4	23.7	407	36650	651.7	362.6	56.4	2448	100830	18357	1
KOS-B_106	179.1	252.6	8.5	95.7	17.3	33.5	75.6	30.1	392.3	34055	642.7	327.6	53.2	1958	96918	16177	1
KOS-B_107	190.9	263.6	12	102.5	19.3	36	82.4	31.9	409	36487	675.2	376.3	67.7	2365	114368	19757	1
KOS-B_108	185.8	269.2	9.5	92.2	17.4	31.6	77.6	20.5	368.4	35367	594.1	387.7	67.2	2481	103015	18152	1
KOS-B_109	166.6	246.9	8.9	95	18.2	31.8	72.8	20.1	382.5	33214	674.2	307.3	52	1911	91790	15612	1
KOS-B_110	176.9	262	9.8	96.3	18.8	33.4	79.6	26.9	410.2	35083	690.4	338.7	65.8	2306	105492	18275	1
KOS-B_111	184.7	262.5	8.7	92.4	17.9	34.7	79.5	27.6	396.6	35331	656.5	374.7	64.7	2416	104311	18412	1
KOS-B_112	185.2	263.4	8.8	92	17	38.6	81.5	29.4	375.3	35796	622.1	401.4	69.1	2558	97749	19095	1
KOS-B_113	189.4	270.4	10.2	93.3	18.3	31.6	77.2	19.5	366.6	35329	595	392.1	70.3	2441	102845	18249	1
KOS-B_114	183.5	268	10.8	87.6	17.3	30.9	74.1	23.2	370	34287	596.6	403.8	77.2	2518	98960	18140	1
KOS-B_115	191.9	259.6	11.6	98.5	18.4	31	78.7	32.7	394.7	35780	593.1	404.6	63	2453	109949	19482	1
KOS-B_116	182	254.8	8.1	103.7	20.4	45.3	82.3	38.9	395	36792	730.8	383.8	66.2	2425	94547	20006	1
KOS-B_117	194.9	268.2	10.3	90.3	17.9	32.3	83.6	21.6	402.1	36534	631	378.2	56.3	2517	99318	18331	1
KOS-B_118	185.8	262.5	9.6	93.8	17.9	31.1	74.5	23.5	377.9	35215	572	381	67.8	2413	101649	17929	1
KOS-B_119	191.1	265.3	9.9	94.8	18.5	31.6	77.6	21.5	382	35836	587.5	378.7	64	2406	102147	18103	1
KOS-B_120	192.1	257.8	11.3	100.4	18.3	29.6	76.4	25.1	377.2	35835	568.6	353.8	59.7	2173	99470	17149	1
KOS-B_121	189.7	268.6	9.1	97.4	17.8	36.1	83.2	25.1	391.5	36244	630.8	351.5	64.8	2313	106352	18491	1
KOS-B_122	187.1	261.5	9.7	97.7	17.9	36.1	83.6	27.8	410.3	36273	670.6	352.4	62.3	2275	107912	18295	1
KOS-B_123	180.3	261.6	8.2	99.5	20	38.5	78.2	27.7	408	35000	764.4	324.3	58.4	2033	104346	17433	1
KOS-B_124	183.3	258.6	9.3	94.6	19.2	38.5	74.8	33	376	35160	654.2	412.3	74.7	2480	93286	18997	1
KOS-B_125	188.1	264.3	9.7	92.4	17.4	32.7	78.1	23.7	379.8	35394	572.6	382	68.5	2440	102791	18246	1
KOS-B_126	192.4	260.4	10.4	100.9	18.8	31.3	78.1	27.5	382.4	35855	575.8	389.2	63.5	2319	109689	18751	1
KOS-B_127	184.5	268.7	9.4	89.2	16.1	32.9	80.9	22.8	373.3	35240	596.2	389.3	67.8	2522	103660	18339	1
KOS-B_128	183.1	272.4	9.3	92.9	17.1	33.3	80.6	22.9	376.2	35535	642.7	372.9	66.4	2492	106050	18489	1
KOS-B_129	182.2	271.6	9.4	89	16.4	31.6	78.5	20.4	365.1	35115	606.7	393.5	67.9	2563	102546	18200	1
KOS-B_130	188.7	267.5	9.9	97.2	18.5	34.9	83.1	28.8	411.8	36410	680.7	345.1	60.4	2404	107076	18841	1
KOS-B_131	181.9	271.2	9.8	93.9	17.9	32.9	81.7	21.1	383.8	35511	663	367.3	66.4	2451	106306	18533	1
KOS-B_132	186.1	256.8	8.9	94.3	16.9	32	80.7	28.4	399.1	35594	601.4	370.1	58.2	2317	104109	17824	1
KOS-B_133	169.1	251	9	93.6	17.6	31.8	73.9	23.9	391	33815	655.9	326.9	57.8	2125	95927	16553	1
KOS-B_134	182.3	255.3	8.4	98.7	18.9	43.8	79.6	37.3	390.5	36447	691.3	394.9	69	2485	93415	19487	1
KOS-B_135	179.5	253.1	6.8	103.1	20.9	42.6	76.8	37.9	393.2	36015	751.1	386.1	63.8	2344	97747	19287	1
KOS-B_136	178.7	261.7	9.2	97.3	17.9	36	80.8	29.2	404.3	35274	685.5	321.7	62.1	2244	105757	18126	1
KOS-B_137	177.6	260.6	7.3	102.5	20.6	36.3	75.7	32.9	410.5	35330	769.3	338.7	61.9	2215	110845	18451	1
KOS-B_138	177.8	252.8	7.9	94.2	17.8	39.5	74.9	36	382.6	35138	643.7	392	66.6	2434	90906	18464	1
KOS-B_139	193.1	267	10.4	97	19.6	32.8	76.4	21.2	369.6	35625	591.7	391.4	70.7	2367	101685	18389	1
KOS-B_140	186.5	263	8.5	97.6	19.4	34.3	77.4	25.5	388	35480	657.4	371.2	64.7	2312	106631	18322	1
KOS-B_141	194.6	268.7	10	97.5	19.2	33.3	81.8	22	393.6	36552	631.9	362.4	60.2	2376	104869	18480	1
KOS-B_142	188.3	258.6	11	91.4	16.2	31.4	80.1	28.2	392.8	35552	585.6	363.7	61.1	2373	97321	17576	1
KOS-B_143	179.4	260.9	8.2	100.1	20.3	36.9	76.6	29.6	409.8	35500	760.9	351.1	64.5	2248	108714	18345	1
KOS-B_144	186.4	255.6	9	103.1	19	41.1	80.4	40.3	390.3	36540	663.5	399.1	65.3	2427	100840	19998	1
KOS-B_145	181.2	254.2	8.3	97.8	16.7	33.1	79.7	33	401	35307	613.8	354	60.5	2227	108279	17864	1
KOS-B_146	177.2	257.5	7.1	96.9	19.6	36.4	74.2	28.2	397	33891	733	325.1	53.1	1946	99149	16548	1
KOS-B_147	182.1	260.6	7.8	98.9	16.7	36	82.9	32.1	407.1	35953	656.3	334.6	59.2	2190	107306	17974	1
KOS-B_148	186.8	257.5	9	93.9	16.9	32	80.9	28	399.3	35664	602.3	371	58	2332	103686	17851	1
KOS-B_149	182.2	264.8	8.9	95.8	17.1	33.7	80.5	28	390.2	35514	640.1	359.2	63.9	2368	107660	18302	1
KOS-B_150	180.7	266.8	7.9	99.6	18.4	37.8	80.9	31.1	407.7	35836	725.4	330	63.9	2211	106823	18307	1
KOS-B_151	175.1	261.2	9.1	93.3	17.5	32.2	77.5	19.5	375.5	34465	654.9	346	58.7	2235	99038	17090	1
KOS-B_152	183.9	260.4	10.9	95.8	17.7	33.5	77.5	31.3	399.5	35460	628.5	381.9	69.2	2441	107376	18898	1
KOS-B_153	184.4	248.4	6.9	103.3	20.3	50.6	79.8	45.4	373.1	37119	703.5	431.6	68.3	2545	83386	20506	1
KOS-B_154	188.9	253.1	11.8	99.5	17.4	28.6	75.3	28.6	381	35531	567.4	344.9	58.2	2135	96233	16672	1
KOS-B_155	181.7	265.2	10.6	87.2	17.1	30.7	72.9	24.8	374	34135	589.5	401.7	77.1	2518	98148	18026	1
KOS-B_156	185.3	270.8	10.4	95.5	18.2	37.2	83.1	23.5	399.8	36249	700.2	357.4	69.1	2411	107359	18680	1
KOS-B_157	179.3	261.2	9.7	88.9	17.5	32.4	72.4	26.5	381.8	33700	620.7	372.9	69.8	2299	96128	17253	1
KOS-B_158	188.1	268.9	8.9	95.1	17.3	36.6	85.3	27.4	408.8	36510	672.3	341.9	59.8	2353	104043	18452	1
KOS-B_159	184.1	259.2	9.5	94.5	18.9	39.1	75.7	33.6	375.6	35313	646.4	412.2	75.5	2504	92558	19149	1
KOS-B_160	172.1	255.7	8.5	93.9	17.7	32.9	75.5	20.4	378.3	33815	669.3	325	53.5	2043	95380	16233	1
KOS-B_161	187.4	266	10.5	87.2	16.7	33	79.1	25	384.6	34930	589.7	393.7	72.9	2524	100090	18425	1
KOS-B_162	183.9	263.4	9.1	90.6	16	32.9	80.6	25.8	380.7	35175	587.9	383.6	66.1	2445	104321	18160	1
KOS-B_163	188.5	265.8	11.2	97.8	18.2	33.4	80.4	28.4	388.8	35885	633	391.4	67.3	2453	110661	19314	1
KOS-B_164	181.8	268	10.1	99.2	19.6	33.8	83.3	23	405.1	35820	705.4	340.1	65.2	2317	109218	18746	1
KOS-B_165	165.5	246	8.6	94.3	17.6	31.6	72.5	21.5	384.9	33284	664.1	308.9	51.7	1958	92093	15661	1
KOS-B_166	187.1	260.6	9.4	97.7	19.4	32.8	77.6	29.6	400.6	35661	670.3	381.6	60.4	2376	106979	18707	1
KOS-B_167	186.9	264.2	9.9	86.6	15.3	35	83	27.1	387.7	35192	571.3	384.5	71.1	2535	102493	18611	1
KOS-B_168	185.3	260.4	8.7	104	20.1	46.1	84	37.5	404.3	37222	752.1	364.7	67.1	2391	100054	19919	1
KOS-B_169	184.8	259.5	9.1	89.9	15.6	34	81.7	28.9	390.5	35138	574.3	379.5	67.1	2426	104323	18264	1
KOS-B_170	190.5	264	9.3	101.1	19	33.4	79.8	25	387.7	36098	615.1	356.4	62.5	2252	108528	18277	1
KOS-B_171	179.6	264.9	9.9	100.8	20.2	36.1	83.6	25.6	419.8	35582	752.6	314.7	62.4	2155	108435	18372	1
KOS-B_172	183.7	268	9.4	93.5	17.7	32	78.5	18.3	366.6	35204	618.8	372	62.9	2369	102067	17760	1
KOS-B_173	183.9	256.1	8.4	103.8	20.5	46.5	83.3	37.9	397.1	37085	742.5	384	67	2420	95065	20045	1
KOS-B_174	181.1	262.8	9.9	94.3	17.4	31.5	77.6	23.7	374.2	34878	620.2	377.2	62.4	2367	103579	18056	1
KOS-B_175	184.9	266.8	9.8	100.6	20	41	83.6	26	418.2	36080	780.5	317.4	62.4	2093	107341	18074	1
KOS-B_176	176	262.5	9	92	17.1	31.9	77.1	19.3	370.4	34466	640	355.7	59.8	2287	98703	17134	1
KOS-B_177	182.3	252.5	10	100.6	18.8	31.2	73.7	34.4	395.4	35060	654.3	365.6	60.5	2220	104709	17895	1
KOS-B_178	185.7	256.1	10.2	99.6	18.7	34.2	76.4	34.4	390.3	34876	631.2	380.6	60.5	2230	105291	18592	1
KOS-B_179	190.6	269.4	11.2	96.3	19.4	35	79.4	22.3	389.8	35811	656.2	372	73.1	2354	105011	18549	1
KOS-B_180	182.8	248.9	10.5	97.4	16.1	30.1	77	33.2	394.3	35182	584.2	346.8	58.2	2146	99468	16813	1
KOS-B_181	185.7	252.1	8.2	103.7	19.6	45.1	80.3	43	383.7	36832	679.7	413.6	66.1	2477	94072	20290	1
KOS-B_182	184.7	260	9.1	90.3	16.5	38.2	82.1	30	384.8	35444	606.6	387.9	69	2498	98192	18819	1
KOS-B_183	180.8	269.2	9.9	97	18.8	33.7	82.9	23.1	398.9	35666	696.2	348.2	65.8	2375	108310	18699	1
KOS-B_184	179.4	262	10.2	89.7	17	32.9	74.8	27.6	392.7	34724	621.8	378.6	73.6	2474	100420	18072	1
KOS-B_185	188.1	266.6	8.4	101.5	18.3	36.1	82.7	26.8	396.7	36435	653.3	336.4	60.9	2193	107842	18222	1
KOS-B_186	180.6	259.9	9	89.5	17.1	32.7	75.5	26.7	393.3	34538	624.4	362.1	61	2333	96751	17283	1
KOS-B_187	186	271.8	9.4	103.1	19	42.3	88.3	28.8	426.6	37276	780.3	307.5	64.5	2190	111516	18900	1
KOS-B_188	184.6	256.4	9.3	100.9	19.5	31.9	74.2	28.5	389.2	35349	659.8	353.8	59.8	2168	102942	17451	1
KOS-B_189	179.3	258.3	7.8	100.6	18.9	35.1	77.6	33	407	35359	704.2	343.6	61.4	2223	109916	18238	1
KOS-B_190	196.8	269.6	10.4	102.6	20.3	34.9	81.6	19	385	36812	635.2	360.3	64.7	2254	108692	18518	1
KOS-B_191	186.2	260.6	8.9	101.1	20.2	32.7	76.1	20	378.9	35390	645.3	349.9	58.7	2132	103433	17479	1
KOS-B_192	179.1	255.1	8.2	94.3	16.1	32.7	77.8	31.8	396.5	35018	599.7	362.3	62.8	2293	104222	17667	1
KOS-B_193	185.8	260.8	10.3	91.2	17.1	31	77.1	28.4	394.4	35345	593.5	390.3	64.3	2513	101763	18432	1
KOS-B_194	176.9	253.6	8.8	97	18.5	34.2	74.8	27.5	390	33751	672	328.6	52.7	1952	98329	16607	1
KOS-B_195	180	257.3	9.5	90.1	16.5	30.8	74.1	29	385	34338	578.6	387.6	70.4	2403	100625	17727	1
KOS-B_196	193	265.4	10.5	91.4	17.5	32.6	82.6	25.3	398.6	36138	609.9	386.1	60.7	2512	102481	18699	1
KOS-B_197	182	249.6	12.2	98.8	16.9	28.7	76.4	32.7	397.4	35202	608.4	325.8	57.8	2112	95662	16590	1
KOS-B_198	188.5	265.7	9.9	87.7	16	34.8	83.5	26.1	392.3	35522	590.2	381.5	68.2	2535	102585	18658	1
KOS-B_199	179.2	253.5	7.7	95.3	17.2	34	76.8	29.8	393.2	34182	635.5	341.4	55.4	2027	100785	16667	1
KOS-B_200	194.5	267.4	10.1	90.5	18	32.6	83.3	22	403.6	36423	636.1	373.5	55.3	2476	98820	18191	1
KOS-B_201	195.5	267.9	10.3	90.3	18	32.3	83.8	21.7	404.2	36599	631.9	377.3	55.7	2514	99097	18333	1
KOS-B_202	183.1	254.5	11.3	96.7	16.1	29.9	76.8	31.4	386.9	35318	597.1	337.8	58.5	2184	95781	16704	1
KOS-B_203	195	262.3	11.3	102.2	19.4	31.1	77.8	27.8	380.7	36019	575.6	398.9	65	2368	111266	19278	1
KOS-B_204	187.3	257.9	10.8	96	16.8	31.4	79.8	29.9	400	35925	620.5	339.6	56.2	2242	97009	17214	1
KOS-B_205	183.7	258.5	10	96.2	18.5	33.3	75.1	30.5	388.4	34236	637.2	367.3	61.5	2166	102680	17798	1
KOS-B_206	177.9	262.7	9.3	99.5	19.9	35.6	81.4	25.9	413.5	34930	739.8	312.1	59.2	2076	105231	17769	1
KOS-B_207	179.5	264.7	7.6	98	18	38.6	80.6	29.5	404.3	35013	719.4	306.6	56.7	2002	101374	17170	1
KOS-B_208	179.1	258	7.2	102.3	18.6	43.3	82.5	35.3	398.5	36378	725.4	338.9	59.7	2213	96783	18625	1
KOS-B_209	183.4	270.9	8.9	92.5	17.6	32.5	78.4	20.8	369.1	35310	640	386.9	65.9	2478	104694	18259	1
KOS-B_210	172.6	254.6	8	94.6	18.2	34.5	74.8	22.7	384.7	33449	689.9	310.9	50.7	1900	94056	15812	1
KOS-B_211	174.3	256.4	8.2	91.3	17.5	32.2	71.3	30.3	392.4	34204	641.2	373.2	66.9	2389	100499	17627	1
KOS-B_212	185.4	268.8	10.4	102.4	19.6	41.7	87.2	25.5	424.6	36979	784.8	310.1	64.6	2165	109980	18627	1
KOS-B_213	185.1	267.3	10	94.3	17.6	31.7	78.2	25.5	374.3	35331	618	398.3	66.4	2495	107350	18799	1
KOS-B_214	190.3	263.9	10.2	94.2	17.4	32.9	82.5	26.6	404.2	36338	640	351.1	56.4	2351	99330	17860	1
KOS-B_215	192.1	260.3	10.6	97	18.6	34.3	80.5	31.6	394.6	36285	620	402	61.6	2495	103019	19368	1
KOS-B_216	192.7	270.5	10.9	97.3	19.3	38.3	86.8	23.5	419.4	37172	728.7	346.5	62.9	2369	106994	18856	1
KOS-B_217	182.8	246	7.5	103.2	19.7	47.6	79	44.3	376	36804	691	410.8	64.3	2441	83515	19705	1
KOS-B_218	187	255.8	10.5	98.6	18	31.1	75.5	26.8	382.3	35050	603.5	337.1	56.3	2055	96587	16548	1
KOS-B_219	182.3	249.1	6.7	102.3	20.1	48.9	79.1	42.7	377.9	36383	715.1	402.8	62.8	2366	84634	19502	1
KOS-B_220	171.2	247.5	8.4	94.9	17	31.6	74.8	25.5	388.5	33913	631.6	330.9	54.5	2051	97350	16325	1
KOS-B_221	172.5	248.2	8.1	96.1	17.4	32.7	75.5	25.7	389.8	33869	647.8	322.8	52	1960	97558	16143	1
KOS-B_222	188.8	263	11.8	102.3	19.4	35	82.1	31.5	409.4	36259	675.4	371.7	67	2355	113894	19656	1
KOS-B_223	184.7	263.3	9.7	86.5	15.6	33.9	80.6	27.1	388.9	35057	575.9	385.8	70.3	2548	101291	18438	1
KOS-B_224	181.1	258	9.7	96.2	17.6	31	75.1	28.7	383.7	35030	643.9	359.8	60.9	2269	100329	17309	1
KOS-B_225	191.4	256.7	10.5	101.3	18.8	33.5	77.2	28.2	375.7	36149	593	367.8	61.1	2239	96818	17793	1
KOS-B_226	191.4	267.8	10.4	91.2	17.4	35.6	84.8	24.2	403.6	36297	643.8	369.6	64.3	2478	103357	18670	1
KOS-B_227	181.4	249.8	7.9	96.7	16.3	33	78.8	33.4	393.3	35173	585.3	373.4	59.8	2234	104847	17697	1
KOS-B_228	189.2	261.9	11.1	95	17.3	33.8	81.1	31.3	393.6	35608	596.1	394.6	69	2478	109343	19388	1
KOS-B_229	178.7	263.1	6.9	101.6	19.4	37.8	79.1	32.1	410.6	35728	757.1	330.9	60.6	2175	108774	18264	1
KOS-B_230	183.4	254.3	11.7	95	16.5	29.6	74.7	31.6	387	34863	591.8	349.4	64.1	2208	94682	16832	1
KOS-B_231	197.5	270.4	10	100.7	20	32.1	79.1	16.5	366.5	36404	583	377.4	64	2308	106453	18301	1
KOS-B_232	182.1	264.6	8.8	96.2	18.6	32.8	76.4	26.8	382.2	35169	667.2	385.8	64.7	2406	107541	18533	1
KOS-B_233	182.9	266.9	8.5	94	18.5	33.2	77.8	23.8	383.6	35353	675.5	378.8	62.9	2422	104670	18220	1
KOS-B_234	180.7	250.5	6.4	103.6	20.9	45.6	77	41.3	385.8	36354	742.5	403.5	64.5	2403	92787	19661	1
KOS-B_235	184.4	245.9	12.7	98.3	16	27.2	73.9	35.6	388.3	35054	560.3	342.6	57	2126	93927	16424	1
KOS-B_236	182.2	247.6	11.4	98.9	17.1	28.7	73.3	34.7	391.6	34974	607	342	57.3	2121	96104	16588	1
KOS-B_237	183.4	247.2	7.2	102.2	19.1	46	79.6	43.3	379.3	36687	672.5	412.5	64.6	2443	88201	19669	1
KOS-B_238	174.2	251.2	8.6	92	16.3	31.1	74.2	28.6	389.3	34193	596.1	359.4	61.7	2264	99279	17041	1
KOS-B_239	183.6	266.3	9.3	102.9	20.5	39.7	82.2	29.1	421	36445	790.3	330	65.4	2228	112246	18856	1
KOS-B_240	184.6	249.5	7	101.7	19.7	49.8	81	44.3	375.6	37050	692.2	426.8	67.9	2555	85192	20422	1
KOS-B_241	180.3	266.8	9.7	102.9	19.7	37	83.9	31.1	422.2	36162	747.4	312.3	64.6	2273	112221	19132	1
KOS-B_242	185.5	256.6	9.6	94.2	16.4	32.5	79.8	31.7	391.5	35204	574	386.7	65.1	2383	107290	18508	1
KOS-B_243	172.9	255.9	8.9	88.9	16	31.4	72.5	28.8	389.5	34151	599.5	365.4	67.2	2410	97286	17360	1
KOS-B_244	175.7	257.5	9.2	91.6	17.2	33.4	75	30.6	394.3	34782	625	375.4	69.6	2476	98878	18230	1
KOS-B_245	181.5	270	8.1	103.1	18.1	39.9	85.6	33.8	421.3	36649	744.7	297.4	61.6	2198	111265	18783	1
KOS-B_246	180.4	263.3	8.8	92.7	17.4	33.6	76.8	24.2	378.1	34317	651.3	346.4	57.8	2156	97606	16796	1
KOS-B_247	182.4	258.6	9.6	101.9	20.1	33.2	77	32.3	404	35354	694.2	371.8	63.8	2301	111803	19050	1
KOS-B_248	180.9	250.6	10.5	95.7	16.7	31.3	74.6	31.4	389.5	34300	617.5	323.2	54.1	1991	92427	15907	1
KOS-B_249	181.5	252.4	11.1	91.8	15.5	29.7	75.1	31.8	387.5	34769	563.7	358.3	63.6	2312	95089	16972	1
KOS-B_250	183.3	266.9	9.3	103	18.6	37.4	83	34.9	415.7	36318	710.9	323.2	63.5	2279	112991	19183	1
KOS-B_251	181.8	270.3	9.5	97.8	18.3	35.1	82.2	27	398.9	35854	694.6	341.2	65.6	2388	109560	18808	1
KOS-B_252	183.9	263.4	10.3	102.1	19.9	42.3	85.1	26.5	415.2	36705	774.2	326.7	64.2	2188	104881	18615	1
KOS-B_253	182.6	257.6	9.3	99.9	19.5	32.2	76.5	17.9	377.3	34995	634.7	333.3	55.8	2053	99862	16904	1
KOS-B_254	176.7	254.3	7.8	95	17.8	32.5	73.7	31.4	395.6	34616	647.2	370.6	63.7	2306	104401	17724	1
KOS-B_255	191.3	266.5	10.1	88.3	16.7	33.8	83.6	24.2	396.1	35913	602.4	381.8	63.6	2533	100977	18521	1
KOS-B_256	192.1	268.9	10.4	96.3	18.4	36.8	83.9	22.9	394.9	36380	644	362.9	68.5	2373	107400	18774	1
KOS-B_257	178.6	265.4	9.3	88.1	16.1	31.1	75.6	23.8	373.4	34671	594.4	388.7	68.8	2539	100282	17915	1
KOS-B_258	176.4	258.1	6.6	100.7	20.9	35	72.6	30.5	399.9	34849	765.9	361.4	61.2	2216	108495	18077	1
KOS-B_259	194.3	261.4	8.8	103.5	20.6	39.4	79.5	27.4	369.6	36892	626.5	395.7	64.8	2365	98014	19174	1
KOS-B_260	181	259.8	10.6	96.9	18.3	31.9	78	30.5	402.2	35196	638.2	371.3	67.4	2404	107959	18884	1
KOS-B_261	175.8	261.9	8.8	100.9	18.8	36.2	82.8	26.5	413.1	35527	734.4	301.6	58.3	2093	105383	17824	1
KOS-B_262	189.2	267.2	10	102.4	20.6	33.4	81.3	21.1	395.2	36192	667	347.7	63.9	2248	109097	18583	1
KOS-B_263	181	257.7	8.1	100.7	19	42.3	79.7	39	396.5	36310	699.4	370	66.9	2439	98343	19503	1
KOS-B_264	187.1	255.1	8.3	96.9	18.2	38.7	81.1	33.6	391.1	36340	640.6	393.1	60.6	2428	95911	18836	1
KOS-B_265	185.9	262.2	11.8	101.3	18.8	36.3	83.6	28.4	416.8	36481	717.7	321.7	63.9	2186	105640	18093	1
KOS-B_266	176	256.1	7.9	93.4	17.9	35.9	76	25.3	390	33534	682.1	316	52.8	1925	94910	16089	1
KOS-B_267	177.4	261.6	8.7	102	20.9	35	79.4	28.1	416	35422	765.9	334.5	63	2215	110411	18570	1
KOS-B_268	193.2	271.9	10.4	100	19.6	35.9	82.8	19.6	387.8	36692	663.2	360.6	66.3	2325	108502	18647	1
KOS-B_269	191.4	268.9	9.4	93.8	17.8	34.8	84.8	24.9	408.4	36670	664	353.5	56.9	2406	101966	18372	1
KOS-B_270	196.2	268.3	10	97.4	19	33	80.5	19.4	375.9	36240	580.6	377.7	64.9	2358	105258	18412	1
KOS-B_271	184	254.7	10.6	94.7	17.9	34.9	74.5	33.5	377.1	35087	612.9	391.8	70.3	2382	91199	18081	1
KOS-B_272	181.1	261.1	9.7	93.2	19	31.9	72	27.9	385	34289	658.5	384.7	72.2	2347	100936	17918	1
KOS-B_273	184	248.2	6.9	103	20.2	50.3	79.8	45.4	373.8	37056	701.7	430.8	68.2	2541	83677	20451	1
KOS-B_274	176.2	262.4	9.1	92.4	17.2	31.9	77.3	19.3	370.5	34482	641.2	355.3	59.5	2278	98962	17155	1
KOS-B_275	189.7	267.4	10	96.3	18.5	34.5	83.1	28	410.4	36422	672.1	350.8	59.8	2420	106093	18790	1
KOS-B_276	178	264.1	8.6	95.6	16.9	35.7	79.1	32.1	406.2	35508	667.2	336.3	65.9	2347	104950	18257	1
KOS-B_277	185.4	262.3	9.9	100.1	18.5	37.5	84.6	28.2	415.7	36377	703.3	340.6	64.6	2229	110474	18488	1
KOS-B_278	182.7	260.4	9.5	99.7	18.8	35.3	77.9	32.6	400.8	34881	677	340.7	59.2	2146	106656	18114	1
KOS-B_279	181.9	261.3	10.3	101.9	20.1	33.5	80.3	30	411.1	35597	704.8	354.7	64.5	2294	111977	19127	1
KOS-B_280	182.5	262.8	8.7	92.8	16.3	31.9	79.4	25.4	377.7	35184	597.2	381.4	63.4	2394	104994	17914	1
KOS-B_281	191.2	261.7	10.8	99.1	18.7	31	76.5	27.4	380.9	35668	574.1	394.8	66.2	2395	108172	18881	1
KOS-B_282	195.2	267.8	10.2	102	19.9	34.8	81.5	20.4	386.8	36659	632.8	360.4	64.3	2250	108584	18434	1
KOS-B_283	181.4	265	8.5	101.8	18.1	37.4	83.1	34	415.9	36159	707.3	315.3	62.2	2236	111415	18663	1
KOS-B_284	179.1	265.7	8.9	100.9	19.3	37	83.8	27.8	417.8	35689	744.1	307.6	60.4	2126	107571	18208	1
KOS-B_285	187	260.5	9.2	103.2	20.2	47.1	84.9	35.3	404.4	37435	758.4	373.6	68.6	2397	98792	19900	1
KOS-B_286	183.8	249.5	6.6	104.5	20.1	51.2	81.3	45.9	379	37344	718.9	417.5	66.3	2504	85068	20475	1
KOS-B_287	181.8	249.3	7.7	97.9	17	36.1	79.1	35.6	390.2	35517	605.3	382.8	61	2283	101294	18168	1
KOS-B_288	189.9	265	11.4	98.4	18.4	36.6	83.5	29.9	406.1	36291	663.1	373	68.9	2401	111404	19449	1
KOS-B_289	195.9	270.8	9.9	99.3	19.5	32.1	79.2	16.9	366.2	36272	586.2	379.4	64.5	2338	106095	18306	1
KOS-B_290	187.3	260.2	12.1	100.9	18.3	36.1	82.6	29.5	413.1	36513	699.2	323.2	63.2	2165	103334	17748	1
KOS-B_291	183.1	261.2	9.7	99.9	18.6	35.9	83.7	28.2	414.6	36037	695.1	339.4	63.8	2229	110077	18440	1
KOS-B_292	179.1	262.1	9.1	97.6	20.1	33.7	75.9	27.7	401.3	34864	718.8	360.2	68	2289	106354	18349	1
KOS-B_293	181.2	262.9	10.5	101	19.6	39.6	84.1	22.9	416.4	36142	770.4	308.1	61.5	2091	105929	17890	1
KOS-B_294	181.5	249.2	7.4	98.9	18.3	42.3	78.3	40	382.3	36096	647	405.9	65.4	2444	92127	19200	1
KOS-B_295	184.5	260.5	9.2	91.2	15.9	34.4	81.8	29.5	393.6	35255	590.8	372.2	66.9	2414	105267	18362	1
KOS-B_296	178.1	255.2	9.2	96.4	18.4	31.6	74.5	20.5	379.1	34500	624.7	339	57.7	2119	97710	16760	1
KOS-B_297	183.1	267.3	9.9	97.6	18.1	38.7	83.1	28.2	415.4	36349	718.1	335.3	68	2318	107367	18589	1
KOS-B_298	175.9	258.6	8.3	90.6	17.1	33.8	73.5	27.2	387	33723	643.1	346.7	60.1	2170	96043	16683	1
KOS-B_299	183.7	263.7	8.8	102.3	18.4	36.5	81.2	34.1	407.9	36088	694	346.2	62	2248	110929	18932	1
KOS-B_300	183.2	259.8	8.1	97.7	16.8	35	82.4	31.2	405.1	35880	642.8	343.4	58.9	2223	106443	17937	1
KOS-B_301	178.1	250.6	10.7	92.6	16	28.9	72	32.5	388.5	34511	578.4	357.9	63.2	2297	94712	16786	1
KOS-B_302	182.5	260.5	9.2	93.9	17	33.1	77.8	29.4	391.2	34941	615.6	369.6	68.1	2304	103416	17921	1
KOS-B_303	187.2	264.4	11.2	94.6	17.7	30.9	76.8	28.4	377.3	35103	590.9	408.8	70.1	2499	107194	19061	1
KOS-B_304	183.7	268.7	8.3	96.3	16.6	38.8	85.8	30.5	407.6	36225	677	329.9	64.3	2298	106637	18567	1
KOS-B_305	183.6	266.3	10.6	96.2	18.4	38.1	82.1	26.9	414.3	36224	712.3	346.7	70.4	2368	107018	18635	1
KOS-B_306	181.4	270.6	8.9	98	18	36.1	84.1	25.9	401.3	36053	702.2	335.2	63.7	2314	107820	18552	1
KOS-B_307	177.8	251.3	7.9	94.9	17.9	40.4	75.2	37.4	380.6	35504	639.9	403.8	68.4	2515	89851	18913	1
KOS-B_308	181.9	270.4	7.5	102.8	17.5	40.6	86.9	33.1	419.2	36829	737.5	298.9	59.8	2148	109299	18542	1
KOS-B_309	184.9	262.7	10.7	94.3	17.2	30.8	76.7	29.2	379.8	35152	586.5	403.7	67.7	2511	107142	18940	1
KOS-B_310	185.4	258.7	10.9	98.1	17.5	32.2	79.4	32	404.4	35852	643.9	330.7	58.8	2253	101140	17637	1
KOS-B_311	185.7	263.5	9.6	93.5	17.8	31.1	74.9	23.1	376.5	35228	575.3	382.1	67.7	2425	101815	17960	1
KOS-B_312	179.4	265.7	9.6	102.6	20.1	36	83	29.5	421.8	35934	753	316.2	64.2	2251	112191	18952	1
KOS-B_313	180.2	268.5	8.2	95.9	16.8	36.5	81.9	28.9	399.1	35867	674.1	338.1	64.1	2327	105021	18235	1
KOS-B_314	187.5	269.9	10.8	103.3	19.8	40.4	86.3	29.6	425.3	37037	764.8	323.3	67.4	2280	114139	19370	1
KOS-B_315	187.5	265.1	10.9	95.9	17.5	31.1	78.3	28.3	376.7	35434	593.2	407	66.8	2507	109270	19208	1
KOS-B_316	181.6	260.6	9.1	101	17.1	35.7	81.3	33.6	408	36053	685.2	311	58.2	2115	102657	17518	1
KOS-B_317	180.6	267.3	8.5	97.8	18.8	35	78.7	28	394.3	35515	705.9	352.7	64.4	2360	108748	18541	1
KOS-B_318	181.6	266	11	94.5	19.2	32.6	78.4	24.9	398.3	34871	672.2	363.7	73.5	2369	104251	18535	1
KOS-B_319	181.5	254.2	8.4	99.9	18.8	32.8	75.4	33.4	397.7	35063	659.5	377	61.6	2259	109631	18368	1
KOS-B_320	183.2	261.2	10.9	101.5	19.4	32.9	81.7	30	410.7	35699	676.8	356.6	64.9	2313	112147	19216	1
KOS-B_321	181.7	265.9	10	97.5	18.3	37.2	81.1	29.9	413.8	36002	706	336.8	68.5	2361	108258	18705	1
KOS-B_322	183.9	259.8	9.4	89.7	16.6	31.3	77.6	27.1	395.4	35253	595.1	379.5	62.8	2467	99718	17875	1
KOS-B_323	183.6	263.7	10.6	97	18.5	34.1	83	28	406.9	35608	663.1	357.8	67.3	2379	109338	19082	1
KOS-B_324	177.5	254.2	6.9	100	19.6	34.1	74.1	32	401.1	34869	713.5	361.4	60.1	2189	108208	17858	1
KOS-B_325	184.1	267.8	8.6	94.9	16.4	38.1	85.3	30.1	404.5	36063	660.5	337.8	65.2	2331	105868	18546	1
KOS-B_326	174	252.3	8.4	97.2	18.8	33.5	74.6	20.8	383.5	33773	675.4	308.6	50.3	1879	94682	15860	1
KOS-B_327	179.3	261.4	8.8	96.4	20	33.4	73.8	28.1	395.5	34619	708.1	370.8	69.1	2304	105026	18212	1
KOS-B_328	180.9	267.9	9.4	99.3	18.8	36.4	83.3	28.1	412.7	35874	718.2	326.3	66.2	2250	107663	18601	1
KOS-B_329	187.4	265.3	9.9	87.3	15.8	35	83.5	26.3	390.9	35356	585.5	382.5	70	2535	102982	18693	1
KOS-B_330	181.8	260.6	7.5	98.5	20.2	34.8	76.2	28.9	405.1	35451	736.1	359.7	59	2274	106113	18159	1
KOS-B_331	185.8	254.9	8.5	97.8	17.1	31.7	78.7	28.4	388.1	35403	576.1	370.2	60.3	2222	106655	17677	1
KOS-B_332	182.6	252.8	10.3	95.4	17.1	31.5	75.5	29.9	392.1	34533	628.6	326.4	52.9	2023	92882	16087	1
KOS-B_333	175.4	248	10.3	94.8	16.7	30.7	75.3	26.6	386.3	34201	617.8	323.1	54.8	2052	93057	16103	1
KOS-B_334	185.2	264.8	10.7	87.7	17.4	30.9	74.8	24.8	383.6	34627	597.8	396.4	72.9	2510	97656	18075	1
KOS-B_335	186.6	263.9	9.9	98	17.3	35.4	82.3	32.9	400.6	35931	634	365.7	65.3	2367	109535	19136	1
KOS-B_336	177.8	261.5	8.8	98.1	19.5	36	79.9	26.1	408.2	34537	730.3	311.6	57.2	2018	102587	17294	1
KOS-B_337	174.6	255.6	9.3	93.5	18.7	32	72.3	23.8	383	33746	665.7	353	64.2	2168	96960	16962	1
KOS-B_338	190.7	260.1	12	101.4	18.7	32.5	79.1	34.2	396.3	35892	614.3	401.4	66.9	2426	113967	19851	1
KOS-B_339	185.8	258.9	9.8	103.1	19.2	38.4	80.1	38.7	399.1	36269	671.4	377.5	65.8	2411	107091	19881	1
KOS-B_340	191.8	266.6	10.1	88.5	16.8	33.6	83.6	23.9	397	35992	605.8	381.3	62.6	2531	100759	18499	1
KOS-B_341	190.4	267.5	10.3	90.8	17.1	35.9	84.8	24.8	401.6	36130	636.7	370.7	66.2	2482	103819	18716	1
KOS-B_342	186.2	270.5	10.7	101	19.5	39.6	84.7	28.6	420.1	36636	754	326.1	69.4	2297	111578	19111	1
KOS-B_343	189.6	269.2	9	95.6	17.7	36	85.3	26.4	411.1	36722	679.7	341.9	57.3	2353	103289	18391	1
KOS-B_344	187.1	256	8.3	96.7	18.9	41.8	80.5	35.3	387	36642	663.4	406.1	63.4	2538	90478	19401	1
KOS-B_345	182.1	260.3	9	102.4	19.8	34.7	76.9	34.4	406	35509	708	358.5	63.5	2294	112361	19015	1
KOS-B_346	183.4	261.5	9.7	87.9	16.6	31.1	76.6	26.2	394.6	35180	596.4	382.6	64.4	2531	97964	17936	1
KOS-B_347	183.2	260.4	10.2	90.3	17.2	30.9	74.4	27.3	380.5	34288	586.1	394.6	73.7	2390	100606	17883	1
KOS-B_348	190	270.9	9.9	89.9	17.3	32.1	82	20.3	384.1	35993	623.3	385.5	61.1	2538	101161	18318	1
KOS-B_349	188.4	268.5	9.4	96.1	18.3	35.4	85.1	25.7	412.7	36563	687.3	341.5	58.4	2352	104243	18482	1
KOS-B_350	179.6	264.5	10.2	97.7	19.7	34.2	80.6	25.4	408.6	35038	712.7	335	66.1	2225	105675	18264	1
KOS-B_351	181.1	263	7.8	100.3	17.2	37.1	84	32	411.6	36116	684.7	322.8	59.9	2171	108363	18155	1
KOS-B_352	193	272.1	10.7	100.9	19.8	37.4	84.2	20.5	396.7	36922	691.6	352.1	66.8	2304	109623	18783	1
KOS-B_353	180.1	268.5	8.3	101.5	18.2	38.5	85.6	30.5	419.5	36405	735.9	306.5	61.9	2192	108947	18555	1
KOS-B_354	186.4	263.5	11.7	91.3	18.1	30.4	73.4	28.1	377.7	34362	586.9	412.1	77.4	2482	102275	18685	1
KOS-B_355	183.6	267.1	9.4	96.4	17.5	37	83.2	31.6	408.1	35858	673.1	337.3	67.4	2395	109547	18996	1
KOS-B_356	181.6	268.5	9.2	98.4	18.3	36.7	82.7	28.8	408.8	35843	706.9	329.9	66.8	2255	106509	18499	1
KOS-B_357	186.5	269.3	10	98.7	19.4	33.1	81.7	20.8	389.8	35939	661.4	356.1	65.1	2338	107876	18576	1
KOS-B_358	195.2	270	9.4	102.6	19.7	34.4	81.1	20.4	381	36659	619.3	354.1	62.5	2232	107458	18349	1
KOS-B_359	175.2	254.9	9.1	90.3	16.5	33.1	77	24.4	386.2	34155	617.8	347.5	61.6	2254	97071	17103	1
KOS-B_360	177.2	254.3	8.4	99.7	19.7	32.8	74.5	21.4	384.2	34556	679	330.9	54.9	2031	100092	16798	1
KOS-B_361	173.8	253.8	7.7	95.7	18.7	35.4	74.4	23.9	388.7	33320	699.5	302.1	48.9	1804	93541	15583	1
KOS-B_362	190.3	266.2	10.6	94.1	18.8	31.2	75.3	21.8	372.4	35055	584.8	391.9	72.6	2376	101903	18134	1
KOS-B_363	180.6	252.6	10.4	99.2	18.4	31.8	75.4	30.2	389.3	34459	629.4	362.2	57.7	2157	104382	17915	1
KOS-B_364	182.7	246.5	10	98.4	16.6	33.1	76.5	36.6	387.5	35430	593.1	362.1	58.9	2206	94226	17272	1
KOS-B_365	186.3	262.5	10.3	95.8	17.2	31.2	78.4	28.8	379.7	35353	590.4	399.7	65.4	2454	108637	18868	1
KOS-B_366	189.2	258.6	11.5	96.6	17.9	29.5	74.9	25.9	376.8	35236	573.5	365.4	65.1	2245	97725	17245	1
KOS-B_367	187.7	264	10.1	101.4	19.9	35.6	80.8	19.6	392.1	36062	678.7	335.1	60.9	2138	104992	17815	1
KOS-B_368	180.6	262.9	10.7	86.7	17.1	30.4	71.5	26.3	377.3	33920	583.5	401.7	78.4	2512	97122	17944	1
KOS-B_369	185.2	250.7	11.7	99.9	17.6	29.3	74.5	35.5	391.5	35169	597	368	60.3	2234	102448	17768	1
KOS-B_370	185.5	260.6	9.7	91.6	17.9	32.1	80.1	21.6	397.8	35497	642.7	354.4	54.3	2328	96762	17442	1
KOS-B_371	182.3	251.1	10.1	95.8	15.9	29.7	76.8	31.6	387.3	35033	574	356.7	58.9	2204	99615	16913	1
KOS-B_372	184.2	266.8	11.1	88.3	17.9	31.4	73.2	25.1	376.3	34126	605.1	399.7	80.1	2463	98174	18151	1
KOS-B_373	185.7	265.1	9.9	88.7	16.1	35.2	83.6	26.6	393.5	35307	600	375.8	70.6	2505	104245	18753	1
KOS-B_374	180.9	256.5	9.1	94.7	16.7	33.7	78.7	30.1	400.4	35284	621.5	363.8	64.9	2313	105339	17893	1
KOS-B_375	195	268.5	10.4	91.7	18.3	33.6	84.5	22	407.4	36727	651.9	370.8	57.2	2484	100734	18445	1
KOS-B_376	185.3	266.9	9.9	88.6	15.8	33.1	81.1	24.3	377	35223	587.5	384.7	68.4	2515	102024	18285	1
KOS-B_377	185.7	257.9	11.9	93	17.3	29.1	73.3	27.8	377.9	34611	576.8	373.5	69.3	2298	95490	17206	1
KOS-B_378	175.3	257.3	10.1	92.9	18.4	31.7	74.2	22.6	384.5	33855	653.3	348.9	65.6	2188	96724	17078	1
KOS-B_379	183.8	257.5	9.3	94.5	18.9	39.9	75.5	34.5	373.3	35376	643.3	419.1	75.3	2522	90638	19214	1
KOS-B_380	191.5	262.7	9.3	103.7	20.5	43	83	30	390.6	37257	701	377.6	66.7	2359	100389	19495	1
KOS-B_381	181.1	264.6	9.1	103.4	19.7	39.5	83.2	34.5	415.7	36377	742.1	325.9	64.9	2314	108742	19368	1
KOS-B_382	184	256.2	11.6	95.7	16.3	29.8	77	29.2	383.7	35329	598.9	348.5	60.4	2240	96540	16891	1
KOS-B_383	179	263.1	8.2	99.4	19	37.7	78.9	31.1	408	34818	730.9	303.6	57.1	2041	104544	17480	1
KOS-B_384	191	266.2	9.9	92.3	17.3	33.8	81	23	380.2	35653	573.6	382	68.6	2444	104094	18498	1
KOS-B_385	181.9	263	9.4	101.6	17.4	36.3	82.3	34.2	412.1	36196	693.8	305.8	59.8	2160	105441	17950	1
[truncated: 5,615 more rows]

## Sheet: Synth. Training Data Kos(stdev)
SAMPLE	Zr	Sr	U	Rb	Th	Pb	Zn	Cu	Ni	Fe	Mn	Cr	V	Ti	Ca	K	CLUST
[truncated: 7,000 more rows]
