# Supplementary material for: Machine Learning approaches in the evaluation of pXRF data in provenance studies of transport amphorae
Source: Research Square preprint supplement (doi:10.21203/rs.3.rs-8310173/v1), 2025-12-22
Supplement: Supplementary file 2 [file c2053aec19625a8c07346697.xlsx]

## Sheet: Kos amphora types
Label	Nsamples	Nmeas	material
KOS-A	20	20	Archaic amphorae, Kos
KOS-H	216	436	Hellenistic amphorae Kos
KOS-R	79	92	Roman amphorae Kos
ATH-H	2	9	Hellenistic amphorae Athens
ATH-R	5	16	Roman amphorae Athens
LEV-H	37	74	Hellenistic amphorae, excavated in the Levant
KOS_CLAY	8	8	clays from Kos

## Sheet: KOS pXRF data
SAMPLE	Zr	Sr	U	Rb	Th	Pb	Zn	Cu	Ni	Fe	Mn	Cr	V	Ti	Ca	K
KOS-A-16-010	232.9	134.5	5	135.3	11.9	17.3	128.7	54.5	138.4	39093	1142.8	183.8	86.9	4462	25822	20702
KOS-A-16-011	137.6	252.4	5	126.1	7.4	25.2	104.4	52.6	254.6	47762	754.5	445.1	92.3	3368	44142	20475
KOS-A-16-012	288.3	362.3	5	158.5	31	56.9	82.1	20.9	163.9	37403	316.2	290.6	69.2	3322	50051	24632
KOS-A-16-013	280.6	392.3	5	178.5	31.6	68.3	106.5	22.4	205.4	49671	429.5	223.7	51.3	2158	29054	15819
KOS-A-16-014	304.5	433.8	10.1	162.8	31.7	73.2	135.2	22.6	201.3	43402	345.4	347.3	64.7	2597	31732	17920
KOS-A-16-015	282.3	411.6	14.4	172.4	32	60.5	80.8	33.2	134.8	41073	436.4	238.3	100.5	3990	43134	28062
KOS-A-16-016	268.6	315.2	9.1	152.5	27.2	53.7	95.5	41.8	142.3	39458	409.9	239.5	98.6	4148	40621	25831
KOS-A-16-017	245.7	331.7	5	152.7	29.3	45.8	86.2	37.3	185	38111	350.5	250.4	79	3548	54650	26632
KOS-A-16-018	274.6	346.1	5	160.9	30.6	60.8	82.2	31.7	152.7	38861	383	214.2	86.5	3307	39851	23818
KOS-A-16-019	245	354	5	152.1	30.8	42.7	82.2	30.8	169.5	35832	301.6	209.9	70	2953	50604	22661
KOS-A-16-020	260.7	234.2	5	158.1	28.2	45.9	82.5	28	154.8	33706	318.7	235.9	72.2	3222	49760	23540
KOS-A-16-021	254.7	356.4	5	159.2	26.1	37.6	87.7	43.8	172.7	40144	339.8	238.4	83.8	3396	66784	24904
KOS-A-16-022	208.1	189.2	5	215	14.3	44	178.1	82.7	98.2	81314	830.8	176.8	69.3	2640	20960	15050
KOS-A-16-023	280.6	385.2	5	155.3	30.3	46.7	88	37.5	130.9	35656	252.2	162.4	74.1	3075	35702	21028
KOS-A-16-024	281.8	279.6	5	149.7	27.9	55.2	91.1	29.9	198.5	39043	397.6	347.3	61.6	3179	36530	22829
KOS-A-16-025	267.1	346.2	7.1	161.5	30.2	55.6	87.8	33.5	169.6	39929	323.7	237.8	96.7	3457	55294	25748
KOS-A-16-026	127.1	383.5	5	140.7	7.3	20.1	88.1	58.3	149.6	42989	775.8	198.7	105.8	3458	99531	22897
KOS-A-16-027	219.8	306.4	6.7	132.2	21.6	42.9	65.2	30.2	153.1	30445	316.9	196.2	91.3	3228	48560	24186
KOS-A-16-028	253.5	325.1	5	168.9	30.1	56.6	94.2	20.7	108.2	39722	282.7	216.2	84.5	3392	46463	26323
KOS-A-16-029	245.3	325.4	5	118.3	21.1	44.4	87.4	41	104.2	35528	556.6	146.1	52.7	2726	65553	16470
KOS-H-01-03a	197.7	291.9	7.4	98.1	22.2	36.9	68.6	25.8	184.7	29838	289.5	230.8	74.1	2688	38161	15346
KOS-H-01-03b	211	321.5	12.4	107.2	20.3	44.2	73.2	37.2	206.8	31370	365.2	271	80.1	3352	52638	19698
KOS-H-01-03c	211.5	324.4	10	105.8	22.1	42.2	80.3	33.9	201.7	31198	328.6	237.7	92.3	3110	57278	19704
KOS-H-01-03d	212.3	319.9	11.1	104.4	25.2	38.9	74.4	23	199.3	31403	378.9	223.2	68.6	3211	56525	19773
KOS-H-01-03e	216.7	323	11.6	105.6	22.9	39.9	82.2	25.9	224.6	32819	377.8	265.2	91.3	3361	46418	20761
KOS-H-01-05a	175.6	256.3	6.3	101.9	21.4	35.3	71.8	31.8	404.2	34799	782.7	357.7	60.5	2178	109045	18052
KOS-H-01-05b	184.1	246.5	6.5	104.7	20.5	52.6	80.5	47.7	373.3	37406	715.3	434.5	67.2	2555	81783	20750
KOS-H-01-05c	181.4	268.6	9.2	103.6	19.1	38.2	83.1	35	422.3	36328	744	302.9	64.4	2285	114224	19201
KOS-H-01-05d	190.7	273.3	11.6	103.4	20.4	43.7	90	24.8	433.5	37766	813.5	318.6	69.5	2245	113991	19352
KOS-H-01-05e	178.7	265.6	10.4	102	20.5	34.7	85	25.4	424.8	35885	753.4	317.3	64.8	2242	111426	18955
KOS-H-01-05f	181.5	271.1	7.3	102.8	17.4	41.1	87.4	32.9	420.5	36890	745.3	293.2	59.5	2133	109044	18470
KOS-H-01-05g	163.3	243.3	8.4	96.5	18.2	32	73	19.3	384.4	33092	689.5	288.3	46.4	1803	90791	15146
KOS-H-01-05h	176.4	257.3	7.2	94.7	18.7	37.3	74.6	26.7	392.4	33146	714.4	302.3	48.8	1766	93658	15553
KOS-H-01-06a	251.9	305	8.5	119.8	19.3	33.6	76.4	36.8	130	31834	548.2	149.4	75.9	3383	51272	18044
KOS-H-01-06b	271.6	309.1	13	130.5	23.1	31	80.7	45	114.4	35695	658	204.2	92.4	3920	63891	21723
KOS-H-01-06c	249.5	294.1	16	120.2	21.4	33.5	81.7	27	122.7	31904	582.4	117.4	81.4	3424	52582	18888
KOS-H-01-06d	257.5	294.3	16.1	122.6	22	36.4	75.6	44.4	133.9	33890	592.8	131.4	100.1	3615	57071	20791
KOS-H-01-06e	264.7	303.8	12.9	125.8	20.5	34	81.9	37.4	140.7	33842	644	145.8	99.1	3869	62234	21055
KOS-H-01-06f	240.9	277.7	12.3	113	22.1	30.8	73.7	44.1	107.3	30656	584.8	113.5	69.9	3043	50428	16560
KOS-H-01-06g	243.5	292.3	11.4	122.6	21.3	34.8	72.2	44.1	122.3	31790	591.8	128.4	89.8	3232	50653	17986
KOS-H-01-06h	251	291.2	13.3	119.6	19.6	38.5	73.5	41.7	123.6	32670	573.3	128.9	75.2	3399	53711	19499
KOS-H-01-07a	156.1	217.5	10	107.7	12.3	21.3	99.7	66.7	246.4	38994	560.5	372.1	100.4	3530	75704	19481
KOS-H-01-07b	155.2	216	11.2	107.4	9.4	23.2	90	50.2	239.8	37532	519.5	331	100.6	3378	79897	18809
KOS-H-01-07c	162.8	211.9	11.7	104.8	13.9	21.5	94.2	49.2	227.3	39563	535.5	281	93.1	3335	68755	18592
KOS-H-01-07d	157.9	222	11.5	107.1	8.5	22.6	91.5	50.9	250.5	39580	560.1	337.5	91.7	3688	84973	20383
KOS-H-01-07e	155.6	214.6	13.9	102.8	10.5	24.1	89.2	46.3	236.9	37600	565.6	331.5	106.6	3329	78780	18860
KOS-H-01-07f	158.2	212.5	7.9	110.2	9.7	23.9	95.2	45.8	257.5	39462	512.8	278.3	89.3	3340	71653	18120
KOS-H-01-09a	227.2	347.4	16	139.9	27.1	46.8	87.4	52.3	195.6	35664	413.2	230.7	97.8	3308	65865	25705
KOS-H-01-09b	214.3	335.6	11.2	133.2	25.6	40.1	80.6	41.8	182.5	32055	360.5	197.9	72.9	2899	58519	22686
KOS-H-01-09c	229.5	348.2	21.3	141.2	26	47.6	89.5	44.8	207.6	34961	386.5	226.8	86	3534	70568	28386
KOS-H-01-10a	231.9	385.4	15.7	144.9	28.2	46.4	85.2	32.1	175.5	38001	370.1	253.2	78.6	3380	65673	24940
KOS-H-01-10b	235.1	380.7	14.9	143.8	25.7	48.6	83.5	25.4	180.4	37275	419.5	198.2	90.4	3554	69726	26404
KOS-H-01-10c	230.7	376.2	16.4	145.6	27.7	48	80.2	27.6	199.1	36302	366.3	178.4	80.4	2699	50476	20182
KOS-H-01-11a	228.2	395.1	14.4	133.3	21.6	27.1	79.4	35.7	256.5	37196	444.1	281.8	77.1	2881	74611	21610
KOS-H-01-11b	233.5	394.6	12.4	136	23.1	42.8	81.4	23.2	252.9	36930	437.8	265.2	86	3017	76707	23123
KOS-H-01-11c	227.5	389.6	14.8	131.3	23.9	30.6	69.6	35.2	246.9	35741	495.8	278	75.9	2905	74723	22102
KOS-H-01-12a	249	386.1	17.4	146.1	26.2	46.6	87.3	36.4	175.8	36531	327.4	234.7	109.8	3575	60153	26525
KOS-H-01-12b	238.4	381.2	15.7	143.2	23.8	43.7	85.3	21.8	189.2	35506	331.9	235.8	91.1	3399	58210	25416
KOS-H-01-12c	243.6	402.4	16.6	148.8	27.1	53.3	91.4	23.3	145.8	35230	270	166.8	59.8	2294	71015	17479
KOS-H-01-13a	222.9	421.8	14.9	126.1	22.6	24.6	78.9	36.9	193.2	32841	376	242.1	72.1	2727	63629	19989
KOS-H-01-13b	230.8	425.7	16	132	25.2	28	81.8	24.2	189.8	33758	313.9	232	74.5	2966	65357	21500
KOS-H-01-13c	223.8	420.2	16.9	123.2	23.4	31.7	71.6	26.7	184.5	31802	351.6	184.8	71.6	2727	62220	19763
KOS-H-01-14a	181.2	250	8	96.1	16	31.6	78.7	32.4	394.8	35009	575.7	368.9	59.3	2210	106542	17473
KOS-H-01-14b	183.2	244	12.8	97.7	15.6	26.6	73.4	35.3	387.8	34963	557.8	328.8	55.3	2067	90156	15764
KOS-H-01-14c	200	269.7	10.1	102.8	20.6	32.1	78.9	16.1	367.5	36607	577.4	374.2	63.4	2260	107000	18301
KOS-H-01-15a	191.1	256.5	12.3	101.8	18.5	30.3	76.9	37.1	391.1	35553	574.2	418.5	66.3	2453	114644	20052
KOS-H-01-16a	251.9	377.4	16	141.3	25.1	49.9	83	37.3	207.3	35005	368.9	290.4	91.4	3648	61793	24597
KOS-H-01-16b	250.1	369.9	15.7	144	25.6	45.1	80.4	30	202.9	34968	389.8	271.1	96.5	3673	65064	26122
KOS-H-01-16c	252.6	367.7	17.8	139.8	24	48.7	81.6	35.4	187.9	34955	386.4	233.2	81.6	3396	59914	23717
KOS-H-01-16d	256.2	376.2	18.5	143.2	25.3	47.8	87.7	28.4	199.1	35203	360.4	278.6	90.5	3745	64678	25832
KOS-H-01-16e	269.6	394.6	18.5	147.7	25.9	50.7	82.6	27.4	209.4	36440	399.5	206.6	61.1	2824	52215	19874
KOS-H-01-16f	251.3	377.3	14.8	144.9	25.6	60	82.5	27.6	182.6	36301	304.7	275.8	100.2	3547	64266	25329
KOS-H-01-17a	214.2	372.5	14.3	129.4	25.5	41.8	75.9	35.6	174.4	31902	288.8	196.1	96.7	2945	59007	21207
KOS-H-01-17b	218.8	377.5	20.3	130	23.4	41.5	80.7	33.7	160.7	32598	335.2	184.9	90.7	3018	60672	22520
KOS-H-01-17c	224.2	387.9	20.5	134	22.8	44.5	76.1	16.7	161.2	33888	304.1	194	78.2	3158	62522	23574
KOS-H-01-18a	248	413.1	17.1	133.4	25.4	52.4	71.1	29.1	169.4	29166	316.2	213.4	74.8	3034	64916	21729
KOS-H-01-18b	252.8	422.3	15.6	132.2	21.8	58.5	79.4	25.1	170.5	30152	314.2	204.3	76.5	2917	62487	21307
KOS-H-01-18c	252	423.2	16.2	125.5	22.7	58.6	73.2	26.4	158.8	30868	352.6	218.1	82.6	3200	69228	23708
KOS-H-01-19a	158.5	213.7	11.1	106.2	9.9	19.2	96.9	61	242.2	38171	495.4	290.6	94.1	3380	76894	18892
KOS-H-01-19b	167.4	226.2	12.5	117.9	9.4	19.6	105.9	38.6	203.3	43147	520.9	286.3	109.3	3691	79655	20792
KOS-H-01-19c	154.3	212.3	11.9	106.7	9.6	21.3	97.8	33.9	213.1	38650	503.3	342.8	95	3344	78750	19361
KOS-H-01-19d	156.5	212.5	13.9	107.3	11	20.8	86.1	40.9	229.8	38946	509.8	293.9	87.5	3374	74059	19087
KOS-H-01-19e	162	218.7	16	109.9	9.1	26.2	92.2	30.9	261.4	39585	524.9	304.8	105.8	3662	84189	20646
KOS-H-01-19f	152.6	214	10.1	105.9	8.2	21.6	97.2	45	220	36867	444.9	267.2	91.5	3172	72541	18252
KOS-H-01-20a	204.8	195.9	14.1	136.3	12.5	24.5	85	39.9	151.5	36697	593.3	267.2	125.2	4920	38391	26696
KOS-H-01-20b	198.3	190.9	14.4	134.3	13.1	25.1	85.7	38.4	160.8	36020	605.1	217	114.6	4658	36105	26051
KOS-H-01-20c	187.7	180.9	15.6	127.9	11.2	27	83	33.5	136.8	35170	549.9	252.2	135	4540	32506	25206
KOS-H-01-20d	193.9	195.2	17.5	138	12.8	25.6	89.3	27.4	139.6	38346	637.6	255.8	131.7	5304	40481	30050
KOS-H-01-20e	186.6	189.8	16.7	132.8	11.4	25.4	85	34.5	143.9	34987	624.7	235.7	133.4	4731	37413	25818
KOS-H-01-20f	185.6	188.8	11.5	131.5	12.8	26.6	84.5	38.1	142.3	35998	595.3	223.2	125.5	4630	35940	25983
KOS-H-01-21a	239.8	356.9	14.8	137.1	26.3	40.4	77	29.5	169.6	31007	369.9	186.7	81.7	2833	53456	20908
KOS-H-01-21b	254.8	368.8	19	152	22.9	48.8	93	34	162	37476	390.6	288.2	119.5	4430	34907	26262
KOS-H-01-21c	256.3	383	21.5	154.1	28.9	45.6	98.9	462.7	334.7	35764	404.1	165.3	70.5	2869	54343	21272
KOS-H-01-21d	248.9	369.2	17.5	142.1	27.3	43.9	96.7	319.2	297.5	32095	397.9	211.3	82.7	3201	60426	23215
KOS-H-01-21e	261.5	394.7	20.8	155.8	29.6	48.3	104.7	228.5	190.7	37294	445.9	212.4	82.6	3584	67214	26170
KOS-H-01-21f	233.1	349.9	20.5	137.3	23.3	41.7	73.8	22.6	140.5	31390	310.6	159.1	67	2602	51647	19595
KOS-H-01-21g	247	361.8	18.2	140.5	23.7	45.7	76.1	23.8	159.9	31733	380.9	199.2	72.7	3210	59374	22688
KOS-H-01-22a	228	162.6	11.6	141.4	13.2	23.5	87.8	38.2	145.7	40998	675.3	205.6	123.9	4941	19754	20457
KOS-H-01-22b	227.7	172.7	17.8	147.8	13.9	26.7	87.4	38.4	147	43334	685.8	239.2	131.1	5703	25240	24813
KOS-H-01-23a	288.9	298.6	14.5	119.9	21.4	35.3	78.9	51.2	121.4	33789	760.3	273.1	96	3618	63390	20355
KOS-H-01-23b	270.9	301.3	15.2	119.8	22.2	39.1	84.9	29.5	114	33312	460.2	160	99.6	3835	53107	21337
KOS-H-01-23c	246.2	300.5	11.6	118.9	23.5	37	80.1	33.8	119.7	31579	708.5	136.6	90.6	3757	60415	21357
KOS-H-01-23d	246.4	302.3	13.1	119.2	22	37.9	77.7	33	125.5	31701	649.4	133.6	95.8	3777	60402	20904
KOS-H-01-23e	302.7	298	14.6	120.3	22.5	35.1	73.5	33.8	130.5	34112	719.5	217.7	108.8	3561	60033	19853
KOS-H-01-23f	254.3	293.4	14.1	113.8	22	32.7	72.4	33.9	123.6	30620	561.3	159.7	89	3088	55303	18208
KOS-H-01-24	265.2	242.4	5	123.7	19.6	33.4	86	40.7	100.9	33949	420.5	154.5	94	4167	38987	20248
KOS-H-01-25a	229.8	321.2	14.4	147.9	27	52.8	112.6	45.3	208.3	35032	472.9	282.8	92	3790	37049	24869
KOS-H-01-25b	238.8	309	16.9	152.1	29.2	47.8	90	26.9	180.4	33724	471.7	157	76	2840	52020	21622
KOS-H-01-25c	245.1	312.8	19.8	148.5	27.3	48.8	90.5	36.7	184.9	33452	555.4	198.2	86.4	3032	60187	22871
KOS-H-01-26a	193.9	273.6	13.9	126.5	20.2	35	72	30.8	170.7	31736	628.9	183.2	90.7	2659	54057	19300
KOS-H-01-26b	221.3	291.9	13.5	142.6	22.7	43.5	84.4	23.8	178.6	36563	697.6	218.6	114.7	3393	57612	24126
KOS-H-01-26c	218.5	284.5	18	145.6	23.4	44.2	92.1	32	171.1	36864	694.5	189.4	96.5	2980	42756	20659
KOS-H-01-27a	249.5	342	15.1	135.7	24.3	39	75.3	31.8	163.1	30853	274.3	253.1	98.6	3435	59850	22717
KOS-H-01-27b	241.7	332.6	20.3	130.8	24.3	41.7	72.9	28.2	148.7	31010	228.8	216.6	91.1	3355	60380	22803
KOS-H-01-27c	256.7	353.9	19	138.1	22.2	42	78.3	20.7	154.1	31898	234.5	230.7	93.9	3700	65640	25028
KOS-H-01-28a	173.5	256.3	9.2	86	15.5	30.2	70.7	29.9	386.8	34015	567.3	386.9	71.6	2545	97033	17609
KOS-H-01-28b	195.5	267.9	10.3	90.3	18	32.3	83.8	21.7	404.2	36599	631.9	377.3	55.7	2514	99097	18333
KOS-H-01-28c	187	265	9.8	86.2	15.3	35.3	83.4	26.8	387.7	35201	571.8	386.5	71.7	2553	102927	18716
KOS-H-01-28d	170.9	281.4	6.8	88.7	16.2	35.4	81.5	15	382.6	36449	601.6	334.4	49.8	1836	74491	13398
KOS-H-01-28e	184.4	266.4	11.5	87	17.9	30.5	71.9	24.4	372.2	33870	592.1	409.5	82	2494	97169	18121
KOS-H-01-28f	183.7	274.3	9.4	89.5	16.5	31.9	79.9	18.8	361.3	35306	613.5	394.7	67.3	2566	103501	18302
KOS-H-01-29a	244.4	378.4	20.4	145.9	27.8	41.2	89.7	43	200.4	36014	360.9	267.3	100.1	3376	60067	25614
KOS-H-01-29b	243.5	348.5	20.3	158.4	31.4	153.2	121.8	36	172.4	38193	386.9	282.8	92.9	3647	47560	25477
KOS-H-01-29c	237.7	352.3	21.5	138.7	26.4	40.4	82.8	18.7	184	33616	316.7	172	81.9	2935	51978	22172
KOS-H-01-29d	248	375.8	23.1	146.5	28.3	35	94.7	20.8	168	37442	345	193.1	77.2	3128	52772	23470
KOS-H-01-30a	258.3	436.4	10.8	160.8	28.2	31.3	97.9	41	217.4	41282	383.9	206.1	66.9	2382	47650	17508
KOS-H-01-30b	257.7	390.9	10.1	147.4	25.7	30.4	105.2	35	225.7	38727	316.3	340.9	78.3	4121	46804	26851
KOS-H-01-30c	236.7	413.5	17.1	144.7	21.8	31.3	86.1	16.9	173.4	36659	322.6	246	77.1	3010	63524	22343
KOS-H-01-30d	230.7	398.1	12.9	143.4	24.8	34.3	88.1	31.4	203.1	35763	332.7	181.9	54.3	2146	45116	16240
KOS-H-01-31a	234.8	416.7	13.6	131.5	22.1	44.5	76.1	24.7	182.6	32968	304.6	240.5	82.3	2939	91388	23275
KOS-H-01-31b	230.2	407.9	20.1	131.7	24.2	38.3	80.1	25.3	177.7	35030	336.6	225.4	71.7	2987	74162	21483
KOS-H-01-31c	230.1	403.6	17.4	129.8	23.1	40.8	82.6	22.2	214.3	31977	331.7	194.9	87.2	2883	90972	22508
KOS-H-01-32a	262.9	349.8	11.4	124.3	25.3	14.4	79.8	49.7	213	35038	393.2	282.6	74.2	3074	75364	18814
KOS-H-01-32b	255.1	318.8	19.7	114.8	23.8	14.4	73.8	19.5	221.5	31207	390	247.6	62.6	2513	58231	15363
KOS-H-01-32c	255.6	328.4	19.8	126.7	22.2	17	64.4	25.5	206.7	32297	421.4	229.4	80.9	2649	70113	17342
KOS-H-01-33a	238.6	400.6	13.8	80.8	26.1	38.5	80.5	35.4	208.9	33237	349.2	238.9	76.7	2914	77286	16119
KOS-H-01-33b	233.8	412.7	17.5	82.8	22.8	42.5	80.4	25.2	190.7	34331	336.1	260.7	68.6	3198	88172	17695
KOS-H-01-33c	248.2	394.5	12.8	79	23.3	43.7	88.2	29.9	195.3	34297	319.1	259.2	88	2942	65120	16104
KOS-H-01-34a	269.7	417.8	13.7	105.5	24.4	32	81.5	25	201.5	33506	356.1	338.2	75.5	2976	87024	17931
KOS-H-01-34b	240	421.3	16.3	109.8	21.6	43.5	70.6	28.2	185	33252	380.6	222.5	77.7	2901	78572	16972
KOS-H-01-34c	253.5	413.3	17.3	106.3	24.1	33.7	82.4	32.8	193.5	33226	348.2	241.7	62.3	2774	82471	16439
KOS-H-01-35a	235.5	391.5	11.5	84.2	23.7	13.8	64.7	28.6	202.1	33671	313.4	290.8	70.8	2847	76037	13950
KOS-H-01-35b	226.6	381.6	15.4	79	21.5	14.5	73	20.4	216.4	31555	393.6	231.6	63.9	2784	75200	13945
KOS-H-01-35c	231.8	394.4	12	84.5	24.8	13.3	77.3	27.6	201.3	33848	355.5	221.7	90.4	2926	80795	14401
KOS-H-01-35d	226.2	393.5	15.3	81.6	25.3	16.6	71.9	15	172.8	34194	339.6	194	59.5	2397	64317	12079
KOS-H-01-35e	236.5	403.4	17.2	83.6	23.2	15.8	76.5	32	197.1	34925	342.1	226.8	89.9	2987	82781	15497
KOS-H-01-35f	227	386.8	14.2	83.1	23.5	16	72.4	23.7	183.2	34975	383.6	223.3	70.4	2836	74076	13969
KOS-H-01-36a	239.9	383.8	11.6	90.9	25.2	13	82.2	34.1	168.4	34436	335.9	251.8	80.3	3049	73344	14615
KOS-H-01-36b	244.9	386.8	13.9	91.8	26.4	14.8	79.6	33.2	187.9	33722	342	254.3	71.1	2860	69033	14061
KOS-H-01-36c	226.5	370.9	12.5	91.6	23.6	35.1	73.7	31.7	204.7	29352	324.5	203.8	61.4	2477	55291	12839
KOS-H-01-37a	224	359.9	14.9	127.3	25.2	36.4	82	32.7	217.9	32399	623.2	263	82.6	2942	88101	19608
KOS-H-01-37b	223	356.6	13.9	124.9	24.5	43.3	75.4	29.3	219.8	30221	645.7	219.8	65.6	2752	93625	19794
KOS-H-01-37c	218.3	350.9	14.4	118.3	21.9	40.3	72	27	201.9	30794	613.4	206.9	68.4	2547	77364	17844
KOS-H-01-38b	194.6	145.4	9.5	110.5	10.9	27.8	80.8	39	82.2	34239	537.3	141	108	3443	61079	18022
KOS-H-01-39a	205.6	151.6	12.8	108.6	11.7	28.1	91.1	44	131.2	34459	606.7	150.1	106	3549	76543	18502
KOS-H-01-39b	190.9	166.2	12.2	106.7	13.7	26.8	84.7	39.2	90.6	34331	604	110.6	90.8	3536	79118	19855
KOS-H-01-39c	189.3	159.8	11.1	107	14.6	29.4	84.1	44.9	95.6	34189	661.3	166.1	97	3946	81475	20675
KOS-H-01-39d	189.6	146.4	15.6	107.4	15	24.4	80	43.8	96	31185	521.4	98	73.2	2931	60260	16235
KOS-H-01-39e	206.8	154.5	14	115.3	15.5	28.6	89.3	39.1	116.3	36172	673.1	132.8	112.7	4054	90562	22477
KOS-H-01-39f	208.4	151.7	11.9	114.7	13.9	29.1	88.4	41.7	125.8	35036	654.8	111.7	104.3	3932	84147	21169
KOS-H-01-40a	134.8	614.5	9.6	47.2	9.2	20.3	70.1	37.3	147.8	27682	676.2	245.9	45.8	2127	154424	7955
KOS-H-01-40b	170.1	608.5	11.4	64	10	23.2	70.4	41.9	101.7	25842	640.2	300.5	46.1	2311	173660	9627
KOS-H-01-40c	147.4	649	12.8	50.8	9.9	23.3	78.4	41.6	108.9	29827	747.2	259.3	59.5	2566	190209	8965
KOS-H-01-41a	211.2	361.3	14.3	117.8	23.1	40.3	77.4	42.8	202.7	30549	329.4	273.2	85.5	3102	78716	24577
KOS-H-01-41b	211.3	381.4	14.7	119.5	21.2	38.8	75.5	29.1	180.8	31482	345.1	243	98.4	3335	88798	25673
KOS-H-01-41c	209.3	361.7	12.2	117.3	23.6	40.8	71.9	30.5	195.7	30232	363.2	227.3	80.2	3161	78995	24560
KOS-H-01-42a	240.8	402.9	23.1	133.9	23.1	27.1	77.3	40.1	225	37680	409	351.3	86.4	3504	53305	22852
KOS-H-01-42b	217.5	397.3	16.2	113.1	22.2	19.4	78.3	24.4	209.8	30708	356.2	177.5	66.2	2530	81276	17755
KOS-H-01-42c	217.5	375.5	15.3	102.4	23.4	28.6	74.1	25.5	191.7	29024	360.7	164	62	2087	61824	14659
KOS-H-01-43a	236.3	352.4	14.4	140.2	25.1	47.1	85.4	36.3	164.8	33220	367.5	225.9	72.9	2945	50278	22145
KOS-H-01-43b	238.1	367.4	19.7	142.3	25.7	46.6	79.6	26.4	163.1	34717	367.3	206.8	82.8	3013	52870	21990
KOS-H-01-43c	246	360.4	17.4	148.6	27.8	45.6	87.3	36.8	174.6	34623	363.6	185	72.8	3233	53360	22841
KOS-H-01-45a	241	391.7	15.8	108.4	24.4	36.4	89.8	37.9	211.9	34851	403.8	251.8	104.8	3257	84685	20426
KOS-H-01-45b	234.6	387.6	17.8	113.4	22.2	44.5	77.2	30.2	221.4	33621	345.5	214.4	79.4	2845	78916	19596
KOS-H-01-45c	236.5	374.1	16.9	111.1	23.2	41.2	85	15	208.6	33303	363.7	192.8	64.8	2420	66379	16958
KOS-H-01-46a	244.4	363.1	22	155.1	27.6	44.6	91.1	40.2	195.2	37803	284.8	233.8	106.9	3389	53876	23996
KOS-H-01-46b	239.3	338.8	26.6	152.1	26.7	50.4	90.4	21.5	197.3	37457	412.4	187.2	83	3286	46169	23124
KOS-H-01-46c	248	354.6	22.3	153.5	31	48	92.4	24.2	204.4	37660	364.9	177.1	101.8	3401	54095	25022
KOS-H-01-47a	212.5	348.8	15.6	121.4	23.2	29	84.1	30.4	179.6	31024	351	276.1	70.9	2576	84742	21175
KOS-H-01-47b	199.8	330.2	18.1	114.8	23.4	29.4	76.5	34.6	168.9	27777	329.6	199.4	70.2	2211	95459	19451
KOS-H-01-47c	230.8	367.6	18.5	125.8	23.9	25.8	79.1	23.4	198.6	32620	330.9	248.6	83	2873	74495	22960
KOS-H-01-48a	236.4	395	20.3	141.2	25.8	38	76.6	110	182.5	35252	390.1	272.6	87.9	3609	57994	26708
KOS-H-01-48b	235.7	363.3	17.5	141.6	26.4	43.9	90.7	84.2	173.5	34446	370.7	280.7	91.7	3727	61236	26712
KOS-H-01-48c	233.9	395.2	18.2	142.6	27.5	40.1	82.1	93.3	181.3	35305	326.5	294.9	97	3799	58255	26806
KOS-H-01-49a	243.6	245.2	14.4	142.7	24.9	39.6	80	98.6	178.4	31016	390.6	272	96.3	3360	68620	25844
KOS-H-01-49b	239.2	242.3	18.1	138.3	23.7	37.4	80.6	54.4	175.4	30441	486.3	270.4	87.4	3387	70637	25652
KOS-H-01-49c	230.7	241.8	18.7	134.4	23.1	35.5	80.9	48.1	166.7	30272	540.9	319.7	99.7	3336	74506	25528
KOS-H-02-01a	205.1	186.4	8.3	79	11.5	28.6	63.4	30.4	112.2	28025	616.7	155.6	97	3654	20185	13543
KOS-H-02-01b	198.3	177.5	12.2	73.4	10.2	24	86.1	23.1	118.5	30222	276.7	161.1	87.4	4848	12352	14832
KOS-H-02-01c	193.5	175.2	10.8	74.5	9.5	23.4	87.8	23.3	117.1	29515	266.4	182.8	99.2	4558	11202	13888
KOS-H-03-01a	280	187.1	6.5	137.3	20.5	28.6	100.3	55.6	117.1	38255	654.2	201.5	125	5002	27340	23106
KOS-H-16-1a	239.7	366.3	5	148	26.6	45.1	83.1	32.7	181.4	37881	324.1	210.2	55.6	2644	53566	18943
KOS-H-16-2a	239.1	392.4	5	149	24.7	67.1	70.5	15	209.2	36671	541.8	198.7	45.1	1742	42280	13533
KOS-H-16-3a	240.1	331.7	6.7	139.2	25.6	54.3	84.2	25.6	167.5	36026	303.7	236.6	72.8	3111	52845	22176
KOS-H-16-4a	236.1	342.5	5	147.2	24.7	48.3	82.6	19.6	244.6	38658	411.9	319.9	92.9	3187	53725	23073
KOS-H-16-85	226	366	5	131.1	26.1	47.8	90.2	33.3	147.2	39084	276.2	220	67.3	3038	45990	21591
KOS-H-16-86	267.4	394.3	11.7	161.6	28.1	54.1	101.8	27.4	167.9	39203	445	273.8	74.3	3566	41712	26388
KOS-H-16-87	271.9	399	5	156.9	28.3	48.6	83.6	24.2	174	39103	469.1	221.1	76	3471	42283	26212
KOS-H-16-88	260.5	391.3	7.5	161.3	27.7	51.9	82.8	21.5	188	40525	297.1	269.4	94.8	3391	50747	25670
KOS-H-16-89	283.3	434.6	5	186.6	33.6	66.9	115.6	38	200.7	51404	549.4	253.8	79.3	3079	43660	24015
KOS-H-16-90	228.4	347.8	5	136.9	23.7	46.4	87.9	18.8	146.3	37068	301	214.5	89.5	3453	51669	22260
KOS-H-16-91	222.5	390.1	6.6	129.9	27.7	50	82.2	37.5	149.8	35880	342.2	237.4	88	3484	53039	25396
KOS-H-16-92	228.1	432.8	5	126.5	22.8	43.9	81.4	45.8	155.7	36558	328.5	190.3	46.3	2729	58196	20923
KOS-H-16-93	227.5	408.8	5	142.9	25.4	54.2	66.9	31.2	145.8	34951	312	205.1	62.3	2547	44809	19406
KOS-H-16-94	253	344.8	5	129.3	25.6	43.5	76.3	25.8	205.7	35964	347.6	289.3	71.6	3028	68456	20599
KOS-H-16-95	179.1	210	5	104.7	9	17.5	59.5	37.6	136.3	39284	527.5	276.9	97.4	4302	33815	17497
KOS-H-16-96	205.4	207.3	5	161.6	12.4	29.5	97.9	39.6	126.7	47964	683.8	243.8	82.4	3709	28166	20651
KOS-H-16-97	257	198.3	5	94.1	10.2	19.6	57.5	23.9	40.4	35499	122.3	87.1	60.8	3677	22000	12285
KOS-H-16-98	228.3	147.7	5	142.4	13.7	25.3	82	42.4	125.5	42280	898.2	231.2	107	5197	15674	23106
KOS-H-16-99	175.2	123.7	5	146.9	6	23.2	98.4	44	193.6	49297	538.4	441.5	114.4	4381	17100	19788
KOS-H-16-100	194.3	173.6	5	131	10.8	25.9	87.2	34	124.6	46723	687.2	273.3	106.4	3953	25780	17242
KOS-H-16-101	235.1	381.7	5	128.6	22.4	40	72.8	29.4	196.9	33234	433.3	273.2	75.2	3028	74811	22636
KOS-H-16-102	152.8	185	5	156.3	11.5	20.5	109.3	51	268.6	49244	676.6	442.7	122.7	4362	48947	21114
KOS-H-16-103	253.7	436.8	5	162.9	31.3	55.4	86.6	38.9	181	39457	401.8	237.8	81.5	3440	45607	24622
KOS-H-16-104	227.2	381	5	127.9	23.7	33	80.1	47.5	209	31355	390.7	182.2	45.9	2344	50649	18587
KOS-H-16-105	251.6	398.4	5	145.5	28.3	20.5	75.3	41.9	162.4	36757	339.2	203.3	64.9	3075	58802	22389
KOS-H-16-106	217.4	387.4	5	129.2	24.3	43.3	72.6	43.1	184.1	31713	335.9	219.9	57.6	3017	61897	22642
KOS-H-16-107	282	405.2	5	172.7	34.5	83.5	114.8	57.6	319.7	50954	1316.3	219.1	50.1	2116	38908	15960
KOS-H-16-108	142.9	209.7	5	70.4	7.1	22.9	78.1	33	236.2	32772	684.1	312.5	50.8	2650	118893	13365
KOS-H-16-109	241.2	357.5	5	137.6	25.9	51.5	79.9	31.5	265.3	39078	504.2	253.3	55.6	2183	54037	16208
KOS-H-16-110	157.5	176.6	5	132.9	13.1	25.2	100	56.6	163	42723	753.5	275.2	100	3645	72839	22911
KOS-H-16-111	236.7	392.8	5	145.5	27.5	47.6	83.2	37	290.2	40474	577.2	277.3	67.6	2792	85110	22338
KOS-H-16-112	138.9	316	5	107.7	7	27.7	112.9	54	610.8	66790	850.5	550.5	68.3	2650	45711	13276
KOS-H-16-113	251.1	378.8	5	152.2	26.5	33.1	75.5	32.3	153	35727	305.8	242	84.3	3583	60884	26709
KOS-H-16-114	205.9	275.7	5	132.1	16.3	31	59.4	19.4	138.2	28860	408.2	130.2	65.8	2464	64916	22222
KOS-H-16-115	267.8	371.6	5	156.7	34	58	97	23.7	157.1	38831	291.3	196.5	76.7	2971	46469	22305
KOS-H-16-116	240.3	363	5	135.6	23.5	40.7	70.7	38.5	252.1	35243	444.8	340.7	63.6	2834	67220	21958
KOS-H-16-117	183.7	138.7	5	108.1	14.5	26.3	78.7	41.8	87.9	33652	509.1	136.7	79.4	3418	75724	18895
KOS-H-16-120	291.9	340.8	5	162.7	30	85	109.1	31.2	257.3	47638	459.4	287.9	51.2	2183	38933	16822
KOS-H-16-121	198.1	267.2	5	112.3	19.2	53.8	85.9	36	364.2	37292	571.9	357.9	72.9	2364	105851	18955
KOS-H-16-122	189.7	151	5	109.9	13.3	38.5	91.5	43.9	98	33659	551.6	122.2	91.6	3204	72057	17477
KOS-H-16-123	190.1	149.7	5	108.7	12.3	42.1	85	32	62.5	32689	490.3	107.2	78.1	3005	72808	17465
KOS-H-19-01a	240.8	317.7	21	137	22.1	62.5	82	145	182.2	30511	485	281.2	87.9	3272	74134	22909
KOS-H-19-02a	274.2	241.4	14	137.2	21.2	54.9	90.8	48.3	79.9	40325	481.2	164.7	113.1	4481	45271	20965
KOS-H-19-03a	258.2	385.5	19.9	143.3	26.6	69.6	81.8	42	145.4	31798	423.5	236.8	81.4	3155	71638	22314
KOS-H-19-04a	267.9	293.1	7.9	146.1	27.7	55.1	76.1	45	146.2	33342	411.6	206.2	72.9	3071	54274	19404
KOS-H-19-05a	218.5	234.4	11.7	154.9	26.7	59	94.2	20	214.9	39112	596.5	252.2	90.1	3634	34374	24023
KOS-H-19-06a	189.1	241.8	8.9	120	21.6	46.7	76.9	54.1	281.9	35670	709.4	237	69.8	2650	58374	18188
KOS-H-19-07a	202.8	241.2	8.4	134.4	22.1	47.2	79.7	41.2	171.9	34471	468.1	207.5	99.7	3132	50544	20434
KOS-H-19-08a	224.8	263.2	12.2	147.1	27.9	51.3	93.9	48	183.4	33741	655.2	225.6	68.8	2707	56375	19351
KOS-H-19-09a	193.7	236.8	11.2	113.6	19.6	45.6	71.7	50.7	229.1	31555	560.4	250.4	60.6	2722	68833	19686
KOS-H-19-10a	225.3	229.9	15.2	158.7	28.2	59.4	104.7	62.8	242.6	44924	556.6	264.4	100.6	3651	38335	24740
KOS-H-19-11a	269.9	305.2	19.7	148.3	23	43.5	78.4	40.9	139.6	30936	316.4	195.8	76.1	3334	82766	23160
KOS-H-19-12a	227.1	242.1	20.8	152	24.9	56.5	95.2	44.5	223.7	39924	545	274	101.1	3576	41554	24273
KOS-H-19-13a	198.7	257	13.8	125.1	23.1	44.6	86.5	34.7	284.8	39645	821.4	295.1	87.5	3249	73594	22324
KOS-H-19-14a	216.1	255.7	18.7	138.9	28.2	47.8	100	52.9	207.2	37139	782.1	167.8	83.8	2748	50663	18171
KOS-H-19-15a	236.1	255.9	21.6	153	25.7	49.9	96.5	41.7	212.3	39794	651.2	287.5	108.9	3629	50174	25528
KOS-H-19-16a	203.9	252.5	14.5	120.8	22.8	47.2	78.9	46.9	245.3	33132	571.4	276	84.8	2920	79244	21905
KOS-H-19-17a	231.7	229.8	25.2	162.6	26.5	52.8	102.8	49.4	253.5	46001	471.1	302.3	119.4	4284	48615	28749
KOS-H-19-18a	217.8	233.1	17.4	126.6	19.4	36.1	73.3	27.8	210.8	32147	501.5	235.2	73.9	2391	60342	16377
KOS-H-19-19a	239	259.9	21.8	131.7	24.6	48.1	90.7	43.9	246.4	37808	566	275.8	91.4	3104	50109	20050
KOS-H-19-20a	190.5	291	17.7	118.8	17.7	42.4	50.6	32.9	111.8	19587	436.5	130.7	75	3213	23543	26854
KOS-H-19-21a	296.1	296.1	16.9	105.7	15	40.2	51.3	23.6	96.4	20838	305.8	222.8	63.8	2549	17017	19694
KOS-H-21-02a	291.2	420.2	13.1	194.2	29.7	85.1	108.4	47.4	150.2	51201	371.3	171	43.1	1846	25087	13819
KOS-H-21-03a	288.4	302.9	11.6	159.1	29.2	56.1	94.6	46.8	134.4	40489	487.2	230	93.9	3319	22505	19794
KOS-H-21-03b	287.3	300.7	11.9	155.9	24.3	60.6	90.4	42.1	141.5	40506	449.7	208.2	75.3	3266	22667	19712
KOS-H-21-03c	305.1	288.8	16	154.6	23.9	59.9	83.3	42.3	120.8	39152	443.8	200.5	68.6	3197	20022	17449
KOS-H-21-05a	265.2	348.4	18.5	150	29	69.9	108	55.3	163.3	41350	361.2	167.5	69.4	2514	39260	17780
KOS-H-21-05b	284.4	348.5	17.8	167	27.6	69.7	94.8	33.8	181	41792	339.2	396.3	93.6	3623	52561	24599
KOS-H-21-06a	263.4	365.1	15.9	164.3	29.4	67.2	96.1	35.6	131.1	38622	520.5	220.3	64.2	3084	65981	22607
KOS-H-21-06b	277.6	344.2	17.3	166.5	25.1	76.3	94.5	30.4	154.8	41851	548.7	213.5	48.9	2642	26736	17325
KOS-H-21-07a	273	382.7	17.9	163.5	27.5	63.4	92.4	41.7	207.3	42931	342.5	231	75.7	2732	50109	19146
KOS-H-21-07b	272	382.3	12.8	169.1	25.9	57.2	89.2	39.3	199.2	44966	347.6	202.5	63.3	2236	33571	15355
KOS-H-21-08a	279.2	395.4	16.6	163.7	28.6	59.2	98.2	47.1	147.9	42154	281.8	269.2	102.6	4216	56458	27274
KOS-H-21-09a	248.1	395.7	16.8	136.6	22.8	53.6	86.7	48.3	201.1	36274	285	264.4	83.3	3377	85892	23747
KOS-H-21-10a	246.8	408.2	9.3	150.5	23.5	62.5	104.3	67.1	157.8	45086	310	184	67.2	2400	40957	17599
KOS-H-21-11a	262.5	433.3	5	173.1	30.6	66.5	101.4	26.6	143	51488	262	240.1	71.5	2803	16189	17420
KOS-H-21-12a	303.4	442.3	16.8	157.3	35	143.4	94.8	39	269.3	42512	496.3	261.7	65.8	2575	40400	18179
KOS-H-21-13a	247.9	418.9	14.3	154.3	29.8	74	80.9	33.7	268	40803	535.7	188.8	51.8	1695	42402	13530
KOS-H-21-14a	262.1	284.3	13.3	161.2	24.7	48.7	87.3	30.7	145.4	38788	562.5	249.2	79.2	3360	63427	25149
KOS-H-21-15a	279.1	349.3	17.9	164.2	27.3	63.9	96.3	27.6	156.3	38382	319.2	253.9	100.5	3866	59919	26533
KOS-H-21-15b	287.6	361.6	22	181	29.8	62.8	105.7	37.4	167.8	46999	360.9	237.3	76.1	3721	52572	24482
KOS-H-21-16a	282.2	340.7	17.8	175	31.2	59	110	37.3	162.6	43439	539.9	187.7	72.2	2768	41565	19160
KOS-H-21-17a	233.6	381.6	12.4	135.6	24.8	56.1	91.8	33.5	182.2	38059	266.2	196.7	73	2738	42557	19035
KOS-H-21-18a	263.3	457.4	21.8	157	28.9	83.3	93	41.6	151	39293	333.9	168.7	53.4	2697	52305	20594
KOS-H-21-19a	288.4	423	22.2	189.7	33.7	67.1	116.8	37.5	184.3	52328	427.7	232.4	80.4	3043	45335	22270
KOS-H-21-20a	239.6	347	19.5	146.8	26.3	54.6	89.9	33.1	183.6	38329	316.5	221.4	90	3569	62286	26634
KOS-H-21-20b	244.7	361.4	17.1	152.2	28.3	53.1	94.1	43.1	172.7	37795	324.8	223	104.9	3618	60179	27056
KOS-H-21-21a	287.1	452.4	21.3	186.6	30.3	76.7	110.3	32.3	151.3	48369	445.8	184.3	66.8	2533	41323	18781
KOS-H-21-22a	280.8	347.9	18	164.3	31.5	71.3	101.7	55.5	281.5	47035	512.7	285.5	61.5	2847	39405	20718
KOS-H-21-23a	268.4	413.7	21.5	164.1	27.9	87.7	86.2	31.6	152.3	38486	260.8	224.3	76.8	3100	42305	22105
KOS-H-21-24a	296.5	429.8	22.6	188.1	33.1	81.1	99.3	47.2	153.2	50285	351.9	216.1	72.5	3178	31623	20117
KOS-H-21-25a	246.9	351.4	17.7	150.1	30.8	60.4	94.7	37.2	224.4	39335	325.1	262.6	94	3454	60355	24971
KOS-H-21-26a	273.2	432.1	15.4	174	28.8	75.3	97.3	34.4	155.8	44307	444.8	182.9	75.7	2882	48578	20910
KOS-H-21-27a	271.2	577.8	19.1	121.3	28.7	56.2	76.6	39.7	139.1	37053	749.6	180.4	101.1	4102	68161	21121
KOS-H-21-27b	288.9	650.9	12.9	130.8	28.9	63	89.3	47.4	115.4	41249	717.4	148.4	82	3904	61282	21623
KOS-H-21-28a	273.1	388.4	14.6	179.8	30.4	75.9	93.5	45.8	254.1	47193	328.9	157.2	52.7	1817	28653	13252
KOS-H-21-28b	235.6	331.3	17.3	144.8	24.2	50.3	74.1	28.1	258.3	37237	456.3	302.7	102	3255	53550	23621
KOS-H-21-29a	229.5	369.9	18.5	145	24.4	49.9	98.9	38.4	198.8	35769	332.9	228.6	70.1	3082	60591	22616
KOS-H-21-29b	244	369.7	17.2	147.4	26.4	53.1	84.6	40.2	193.1	36226	344.2	222.3	84.5	3112	62464	22935
KOS-H-21-30a	235.3	402.8	17.7	132.9	23.2	54.8	79.3	31.3	190.1	33841	366.4	216.1	80.6	3270	89889	25258
KOS-H-21-31a	231.6	385.1	15	136.1	27.4	60.6	93.2	45.8	164.3	35923	254.6	218.3	84.4	3060	65954	23392
KOS-H-21-32a	246	296.5	21.7	184.3	22.7	73.1	105.4	39.6	271.3	54641	371.6	246	78.6	2949	24364	18806
KOS-H-21-32b	240.2	277.8	14	178.3	27.6	85.7	113.7	43.1	263.9	51687	590.6	239.2	69	2506	30448	18954
KOS-H-21-33a	260.9	149.1	13.7	178.5	20.3	76.8	105	29.1	205.2	42256	709.7	207.9	50	1885	44265	13750
KOS-H-21-34a	226.2	255.8	19.7	148.7	26.6	49.3	85.6	69.5	192.5	36745	334.5	322.1	86.2	3824	61225	24455
KOS-H-21-34b	227.4	264.1	19.3	155.1	22.7	54.9	89.2	44.3	207.9	38259	397	312.5	77.9	3477	61752	24650
KOS-H-21-35a	243.2	385.5	16.9	149.9	24.7	70.7	90.7	27.6	138.7	37846	249.7	182.9	97	3184	50176	23326
KOS-H-21-36a	224.1	314.7	14.3	149.2	25.4	53.7	94.6	46.2	262.2	44099	662.3	271.3	89.5	3175	60139	22320
KOS-H-21-36b	217.4	310.2	13.8	150.5	33	56.2	97.2	49.5	267.8	45103	724	260.4	76.5	2732	49986	18919
KOS-H-21-37a	289.3	223	17.8	153.9	21.6	48.2	104.1	57.9	100.2	45804	309.5	109.5	72.6	2696	19847	12625
KOS-H-21-38a	317.9	233.3	17.9	147.9	21.9	67.9	86.1	43.9	76.3	44869	316.7	146.5	65.9	2897	16560	12878
KOS-H-21-38b	315.2	239.6	17.8	152.9	25.7	68.2	81.7	48.7	84.7	44916	371.1	141.3	76.2	3405	18148	16322
KOS-H-21-39a	260.2	484.9	21.7	153	30.6	87.2	95.1	38.1	147.8	37657	258.5	231.8	71.4	3107	63109	22852
KOS-H-21-40a	246.5	429.1	18.9	160.2	28.9	65	97.8	27.4	131.8	41401	266.8	155	67	2539	44033	19497
KOS-H-21-40b	256.1	433.3	19.1	169.5	30.4	63.6	94	53.6	182.3	49767	286.2	175.4	67	2444	20843	16827
KOS-H-21-41a	318.4	362.9	23	169.6	28.3	63.6	94.7	35.6	133.4	36679	293	282.9	98.2	3501	44294	23855
KOS-H-21-41b	315.7	365.9	22.9	190.1	33.9	80	111.7	43.7	143.7	44611	362.7	212	87.2	3221	27448	20681
KOS-H-21-42a	260.5	393.4	21.9	154.9	28.2	60.3	88.7	40.2	165.4	35251	380.6	196.7	98.2	3819	63540	27203
KOS-H-21-42b	270.2	422.3	19.3	159.7	29.4	55.5	87.5	43.8	143.2	39101	359	238.4	74.2	3315	52754	23792
KOS-H-22-01a	222.8	178.8	5	110.9	15.3	40.7	124.9	53.2	130.2	46811	537	154.5	126.5	5906	9941	25750
KOS-H-22-01b	221.7	177.1	5	115.1	14.6	48.2	144.5	62	135.5	40185	1368.4	182	133.3	6315	16290	32805
KOS-H-22-01c	220.7	159.8	8.6	110.8	13.5	43	128	53.3	138.7	41068	455.1	165.2	91	5658	10102	31729
KOS-H-22-02a	242.5	194.4	7.6	90.4	18.6	33.2	147.7	53.1	193.1	42531	478.1	270.4	80.5	5309	26630	16641
KOS-H-22-02b	264.7	197.8	7.7	99.2	18.3	33.7	172.7	59.3	183.1	50677	576.9	309.2	105.9	7019	28491	21984
KOS-H-22-02c	249.8	181.8	7.3	95.5	17.1	41.6	119	57.7	155.1	44343	440.3	259	71	4535	21282	13589
KOS-H-22-03a	226	208.1	9.2	112.2	14.9	33.3	147.9	43.1	205	42266	710.5	237	106	4916	24991	19553
KOS-H-22-03b	228.7	194	11	117.9	17.2	39.3	128.1	41.5	174.9	42858	659.8	170	73.5	3083	14938	12014
KOS-H-22-03c	231	171.9	9.4	109.7	12.9	34	104.7	32.9	173.9	37478	598.5	238.2	93.1	4191	18332	15570
KOS-H-22-04a	179.6	161.5	5	96.2	11.1	26.8	166.6	37.9	158.6	34804	437.3	137.1	101.7	5274	23212	21940
KOS-H-22-04b	227.1	178.3	7.6	121.4	14.6	31.3	208.3	49.8	137.1	39430	440.7	161.8	90.9	4072	17249	17638
KOS-H-22-05a	240	183.1	11.6	116.5	18.6	42.3	212.6	57	180.1	40171	747.1	231.3	84.8	4812	19440	22269
KOS-H-22-05b	248.2	200.2	8.1	117.7	20.2	35.1	321.1	55.1	209	48973	1154.2	287.5	143.6	6441	26554	23373
KOS-H-22-05c	238	188.7	11.6	105.1	18.5	33.4	233.9	48.5	165.6	44066	867.1	232.8	79.9	4649	17135	15082
KOS-H-22-06a	244.4	174.1	10.9	107.3	16.8	45.3	175.8	47.8	132.4	43123	438.7	208.5	109.1	5746	13665	21656
KOS-H-22-06b	245.2	156	8.5	119.8	15.9	55.1	120.1	62.1	120.6	45218	1065.6	203	133.5	6254	9762	32835
KOS-H-22-06c	227.4	159	10	105.2	15.5	37.7	137.6	48.7	147.7	46411	541.2	216	110.2	5945	8126	23143
KOS-H-22-07a	253.6	181.6	14.3	92	17.3	37.7	135.4	59.5	195.8	45805	552.5	342.8	118.1	5990	21008	18853
KOS-H-22-07b	260.5	176.8	9.1	114.3	17.6	39.1	142.8	48.6	190.3	47681	543.6	267.6	93.2	6558	14211	29271
KOS-H-22-07c	237.7	163.6	10.5	106.3	16.2	34	174.4	58.8	155.2	38343	473	177.4	87.7	4718	13185	19243
KOS-H-22-08a	256.4	215.8	10.6	124.1	18.4	42.4	160.1	55.9	181.3	51386	770.5	215.7	97.6	6480	27829	22210
KOS-H-22-08b	243.4	201.6	13.1	125.9	14.2	40.9	196.3	57.7	129.5	50262	746.3	195.6	85.9	5050	24203	18778
KOS-H-22-08c	230	183.1	9.5	108.7	14.2	38.4	173.2	41.6	169.2	50114	619.7	191.9	109.4	6245	20777	21470
KOS-H-22-09a	268.1	194.7	9.7	134.6	16	39.1	790.5	53.3	169.9	54231	947.5	286.2	96	5641	20200	20409
KOS-H-22-09b	224.7	197.8	11.1	107.1	17.6	36.9	615.7	56.7	190.8	48537	758	235.9	71.6	5735	34209	19115
KOS-H-22-09c	252.3	178.1	12.3	116.6	14.9	37.2	640.5	41.4	167	46319	780.4	281.8	86.1	4823	17298	17078
KOS-H-22-10a	216.2	155.9	12.1	109.8	15.4	39	280.7	49.8	122.4	41655	605.3	115	94.3	4071	6759	16888
KOS-H-22-10b	251.1	173.9	9.9	126.2	17	41.1	302.9	54.9	156.1	48167	505.1	181.7	140.1	6554	13216	27291
KOS-H-22-10c	236.3	158.6	11.4	113.4	17.2	37.7	228.4	68.3	134.8	43294	400.9	182.9	136.9	6149	7544	26457
KOS-H-22-11a	246.4	208.9	14	123.3	17.1	43.2	216.5	49.6	147.5	45561	857.2	192	90.3	5347	31020	20123
KOS-H-22-11b	237	215	11.8	123.2	15.6	53.2	185.2	58.6	162.3	43523	811.9	190.5	95.1	5230	31634	21399
KOS-H-22-12a	279.3	186.7	15.7	109.6	20.5	36.9	201.7	54	206.1	46503	533.7	267.1	84.9	6088	27526	20068
KOS-H-22-12b	254.7	188	10.1	111.2	16.3	37.4	197.6	42.7	164.8	43296	529.1	212	75.6	4150	22907	16152
KOS-H-22-12c	245.8	187.2	9.8	105.2	18	38.8	203.8	56.3	147.4	40398	628.8	197.2	83.5	4302	25899	15666
KOS-H-22-13a	246.8	187.5	7.4	111.4	19.7	39.9	182.4	50.4	169.2	44267	555.6	206	109.5	5332	25911	18423
KOS-H-22-13b	245.1	195.5	14.9	136.3	19.4	38.1	210.3	56.2	126.8	42971	655.1	218.2	93.5	4884	29489	21430
KOS-H-22-13c	270.5	176.7	11.4	109.8	19.3	39.8	278.2	65.2	187	54573	778.1	265.1	90.6	7164	27431	20131
KOS-H-22-14a	251.9	189.7	11.9	126.4	18.1	44.6	485.7	58.9	171.8	47709	815	249.8	116.7	4941	28108	18340
KOS-H-22-14b	222.4	164.5	14.2	116.8	13.4	34.4	264.2	35.8	166.6	38215	477.5	186.9	90.9	3894	21730	15581
KOS-H-22-14c	239.1	193	12.5	119.6	18.8	36.6	363.2	57.7	154.9	43827	943.2	210.2	101.8	4980	23169	19493
KOS-H-22-15a	241.6	190.3	12.1	115.8	16.9	38.3	158.4	47	180.4	45053	863.4	228.5	79.5	5100	24777	18656
KOS-H-22-15b	230.4	185.1	7.9	113.2	14.9	35.8	162	58.4	178.7	41317	700.7	220.9	92	4268	19323	17484
KOS-H-22-15c	232.6	186.4	10.9	111.6	16.9	37.8	200.8	56.6	200.4	46386	1105.1	241.2	110.1	5849	22099	20732
KOS-H-22-16a	239.2	244.1	14	127.2	19.2	36.4	150.3	54.6	154.8	40730	778.8	201.7	92	4435	50290	20458
KOS-H-22-16b	232.4	237.3	14.2	118	16.8	33.6	133.8	40.4	159.7	39152	713.3	175.2	111.4	3964	48982	17488
KOS-H-22-17a	266.2	191.6	8.4	114	17.9	44.3	415.9	56.9	173.4	45629	1433.1	262.4	104	6143	30916	21230
KOS-H-22-17b	240	189.4	7.3	104.1	17.7	34.5	448.2	50.1	150.5	39480	729	201.9	82	4311	25568	17386
KOS-H-22-18a	215.8	168.1	13.4	106	15.7	34.4	436.9	56.2	199.3	43304	576.5	230.5	97.8	5492	23400	19303
KOS-H-22-18b	225.7	176.9	11.1	126.8	19.6	39.5	372.6	48.5	140.3	42068	521.4	159.6	89.4	3730	19347	16972
KOS-H-22-19a	212.7	194	5	106.2	14.8	57.5	182.2	53.4	174.4	43458	680	147.6	67	2958	8598	12310
KOS-H-22-19b	223.8	171.8	11.2	117.7	17.8	43.1	165.8	54.1	159.4	37930	1975.7	193.6	97.6	5123	28953	22671
KOS-H-22-19c	225.2	176.2	13.9	123.6	17	40.9	173.9	58.8	185	46752	709.9	198.9	124.9	6541	21365	32756
KOS-H-22-20a	191.4	304.2	9.1	135.2	13	48.5	296.6	68.8	119.9	59723	1091.7	57.3	109.3	4070	22580	13966
KOS-H-22-20b	173.3	271.9	13.5	118.5	17.4	48	243.4	64.3	96.9	58888	961.5	88.9	106.9	7017	26296	16859
KOS-H-22-20c	146.3	280.8	11.2	112.3	9	37.8	101.3	36.5	50.4	35561	702.5	66.3	73.3	2915	22771	13875
KOS-H-22-21a	221.8	183.6	15.6	120.5	15	35	203.9	37.1	138	37535	597.1	147.3	92.6	4105	26317	18635
KOS-H-22-21b	244.5	213.5	11	111.7	16.8	39.3	193.3	47	166.8	50950	735.9	197.2	95.6	4867	26126	17559
KOS-H-22-22a	236.5	146.4	9.3	122.4	17	47.3	159	56.4	172.2	48848	537.2	218.8	113.3	5947	9408	25203
KOS-H-22-22b	221	161.6	7.8	108.6	13.2	43.1	159.6	69.4	190.1	49166	649.1	166.2	68.3	5105	9385	23133
KOS-H-23-01a	367.3	122.3	5	63.3	17.8	48.3	83.2	51.1	60.5	28943	280.3	168.2	148.8	9350	17067	13468
KOS-H-23-01b	394	132.2	5	69.9	19	43.8	92.3	36.8	30	33102	240	117.9	108.5	7760	8108	10997
KOS-H-23-01c	374.9	117.4	6.3	62.8	16.2	42.5	84	43.5	61.6	27032	278.8	147.4	138	8576	22330	13751
KOS-H-23-02a	208.5	204.2	5	121.4	15.8	40.9	62.6	10	109.2	30607	293	148.1	47.1	2734	14988	14230
KOS-H-23-02b	228.1	240.6	9.1	124.5	17.5	54.3	70.4	10	196.2	32391	1371.5	205.7	56.2	2738	25944	13781
KOS-H-23-03a	201.3	214.8	5	131.7	17.1	24.3	64.6	10	97.5	37905	277	237.6	87.2	3933	13839	17161
KOS-H-23-03b	217.6	165.5	7.5	124.3	13.9	38.9	80	10	159.8	36364	335.8	280.3	73.8	3876	16755	24333
KOS-H-23-04a	340.5	240.5	13.9	140	35.6	125.7	90	21.3	41.9	38212	603.8	56.7	100.1	4076	7023	17326
KOS-H-23-04b	354.6	246.6	15.3	144.2	37.1	127.2	91.3	27.6	63.4	42863	663.7	102.7	87.7	4976	8534	21399
KOS-H-23-05a	232.4	243.1	5	117.8	13.7	37.9	74.1	18.2	130.3	31314	383.8	132.5	57.8	2748	23129	14864
KOS-H-23-05b	209.2	241.3	9.9	120	16.1	35.9	69.9	18.4	121.7	31044	326.4	235.9	61	3045	19254	16669
KOS-H-23-06a	192.7	202.4	6.6	130.5	16.5	34.8	72	10	117.9	28619	397.4	115	51.6	2260	19103	13046
KOS-H-23-06b	195.9	218.3	6.4	105.8	12.5	37.3	65.2	16.6	100.7	25076	289.4	154.4	45.6	2385	73134	13969
KOS-H-23-06c	243.8	225.6	11.6	120.5	17.9	26.6	53.2	10	90.5	30174	333	134.2	58.6	2384	10863	13049
KOS-H-23-07a	229	196.3	7.5	131.5	14.1	31.5	57.4	10	82.8	27168	223.8	147.5	71.1	3458	8356	21689
KOS-H-23-07b	246.5	183.9	5	130.8	17.1	32.2	46.7	15.3	85.9	27213	323	133.4	74	3430	8019	20698
KOS-H-23-08a	196.4	157.4	9.1	117	15.5	30.4	60.2	17.4	109.2	29433	256	111.7	53.5	2425	8790	12242
KOS-H-23-08b	200.1	182.5	11.9	123.4	20.9	51.2	75.3	29.5	152.2	33305	338.6	186.5	78.8	3887	39420	19828
KOS-H-23-09a	238.9	291	7.9	125.1	22.5	47.1	72.7	15	173.8	33886	426.3	298	65.5	3266	13061	20923
KOS-H-23-09b	243.9	270.9	9.2	127.7	19.6	50	71.6	15.8	157.1	32625	622.9	263.6	65.8	3015	12552	19287
KOS-H-23-10a	246.2	261.3	13.4	143.6	23.3	54.2	77.3	13.6	130.4	33727	298.7	224.2	84.5	3596	31955	22366
KOS-H-23-10b	278.2	277.4	11.6	153.4	25.3	55.8	79.1	24.9	127.6	37358	357.7	256.6	103.8	3879	33262	24414
KOS-H-23-11a	232.6	376.6	9.8	75.3	13.9	78.1	98.4	34.2	98.1	41006	951.8	132.4	107.4	4738	17817	16533
KOS-H-23-11b	248.7	372.7	8.6	78.2	13.3	58.4	97	25.4	80.7	40862	740	110.4	74.7	4250	15549	14185
KOS-H-23-12a	249	207.6	9.7	124	17.3	42.7	51.9	15.5	103.1	21124	114.9	296.4	87.4	3785	7625	21906
KOS-H-23-12b	231.7	198.2	11	123.4	16.8	42.6	52	12.8	106.9	19943	100.8	307.5	85	3354	6949	21357
KOS-H-23-13a	230	252.4	10.2	136.4	21.8	40	68.1	23.4	86	31885	403.7	211.3	82.8	4107	15490	23142
KOS-H-23-13b	206.8	251.8	7.9	133.7	19.3	48.3	61.5	14.1	98.1	30656	380.9	224.1	82.1	3817	14708	22839
KOS-H-23-14a	319.9	201.7	8.3	126.9	15	38.3	58.9	10	105.4	28411	195.9	295.1	85.2	3755	12808	20608
KOS-H-23-14b	275	220.3	8	129.8	19	35.9	62.2	15.4	104.8	29211	172.6	446.4	80.8	3886	15894	21085
KOS-H-23-15a	201.6	67.9	7.2	110.7	13.1	154	114.8	55.6	177.3	45221	1418.1	299.7	127.4	4408	12977	18797
KOS-H-23-15b	195	63.1	8.8	104.2	11.3	178.3	104.8	38.4	174.1	41556	1351	217.7	87.4	3153	10819	14243
KOS-H-23-16a	207.3	200	9.1	120.9	14.5	33.6	53.2	17	123.1	20048	115.8	230.6	84.8	3446	7367	21892
KOS-H-23-16b	223.4	202.4	12.3	116.1	16	35.3	57.6	26.4	101.6	20017	105.8	239.5	80.5	3116	15711	19413
KOS-H-23-17a	243.2	352.9	11.5	104.9	18.9	39.1	60.4	19	123.9	28834	155.1	198.6	61.7	2750	37300	18127
KOS-H-23-17b	210.5	311.1	9	108.9	16.9	42.4	62.3	23.6	103.5	27978	192.4	281.5	66.1	2679	38288	16763
KOS-H-23-18a	208.2	351.5	12.7	115.5	24	47	67.1	20.7	145.8	31687	231.4	240.9	82.2	2891	48742	19888
KOS-H-23-18b	214	357.1	12.6	133.2	22.3	56.6	72.9	10	160.1	44576	265.8	183.9	69.3	2702	39982	21374
KOS-H-23-19a	246.6	318.9	13.4	123.1	18.9	76.2	67.4	34.1	198.8	30190	417.2	300.8	75.5	3302	54863	23628
KOS-H-23-19b	261.8	308.9	11.5	121.7	21.9	102.3	64.8	29.5	203.1	30337	419.8	286.9	79.7	3129	51301	22545
KOS-H-23-20a	191.8	305.7	8.5	114.6	17.1	58.1	57.3	15.3	121.1	26098	213.4	144.8	68.7	2507	42629	20931
KOS-H-23-20b	199	348.1	12.9	128.7	22.5	53.9	63.7	21	128.7	30762	235.7	216.2	81	2888	55598	23798
KOS-H-23-21a	477.3	194.8	12.6	236	51.2	57	81.3	26.4	31.4	33281	354.9	57.9	63.7	2324	6672	38730
KOS-H-23-21b	458.3	185.1	13.4	225.5	44.4	56	76.5	24.9	30.9	31741	374.8	48	57.1	2378	6537	39700
KOS-H-23-22a	168.9	173.6	6.7	94.6	8.8	28.3	70.9	21.1	75.5	30772	494.9	138	76.5	3066	88099	16518
KOS-H-23-22b	162.7	171.4	5	95.4	9.7	23.2	69.9	21.4	46.5	29913	492.3	149.8	76.4	2869	79510	14999
KOS-H-23-23a	146	235	10	156.8	13.8	23.8	72.7	43	96.8	30544	479.8	180.6	76.8	3233	90076	24949
KOS-H-23-23b	151.6	238.5	8.6	151.6	15	24.8	73.4	40.7	108.4	31229	513.3	171.4	85.2	3309	93482	26092
KOS-H-23-24a	282.7	295.9	10	154.2	27.5	60.5	96.5	34.8	123.1	38773	321.2	205.7	64.7	2904	38712	19095
KOS-H-23-24b	278.4	295.7	16.4	158.3	29	55.2	88.6	31.6	155.3	39098	339.5	173.9	64.3	2724	33255	17278
KOS-H-23-25a	229.1	315.7	11.5	117.7	22.6	41.1	79	34.2	406.5	38421	771.7	437.1	89	2698	92349	20073
KOS-H-23-25b	210.6	310.2	13	116	20.8	44.8	78	25	385.6	36131	698.8	450.2	65.7	2548	80016	19232
KOS-H-23-26a	231.6	316.3	13.7	143.9	29.8	47.3	87.1	34.3	195.5	35103	332.3	208.7	81.6	3379	57872	25528
KOS-H-23-26b	230.9	310.9	12.3	136.7	25.6	50.3	83.2	36.8	175.8	34579	355.9	214.4	86.3	3113	56315	22653
KOS-H-23-27a	252.5	445.3	13.4	132.7	31.1	64.4	86.3	34.4	373.1	41811	708.7	422.4	76.9	3261	42935	21532
KOS-H-23-27b	255.9	438	12.6	133.3	33.2	71.4	96.9	43.1	354.4	42755	706.8	456.9	79.5	3088	40350	20307
KOS-H-23-28a	280.4	369.4	11	142.2	26.4	54.4	84.6	25.9	149.1	36708	236.2	196.7	88.4	3182	48080	21635
KOS-H-23-28b	290.1	431.6	14.2	168.1	29.8	72.4	100.7	32.3	164	46545	282.3	200.2	77	2766	42692	19759
KOS-H-23-29a	257.3	448.4	19	168.5	28.2	64.6	105.3	41.9	163.3	44551	428.3	226.9	55.3	3351	54225	24335
KOS-H-23-29b	266.4	457.2	18.8	170.2	29.5	92.6	98.1	32.2	171.9	45543	484.2	228.1	84.9	3380	52448	24431
KOS-H-23-30a	125.3	221.9	5	85.7	3	24.4	95.5	51.3	492.9	56677	672.7	576.9	77.5	2680	69228	9910
KOS-H-23-30b	125.4	228.2	5	88.3	3.5	24.2	94.1	37.6	492.3	57644	660.1	642.4	83.2	3041	77823	11363
KOS-H-23-31a	260.2	356.7	15.1	149.5	26.2	51.5	82.1	32.3	144.9	36124	263.8	220.7	77.2	3437	55367	23520
KOS-H-23-31b	249.3	340.2	15.2	142.1	21.9	46.2	75.7	21.4	140.9	34299	251.3	211.7	94	3207	51438	21590
KOS-H-23-32a	260.1	399.9	16	132.8	23.9	47	70.2	20.3	159.5	30286	316.2	211.8	73.6	3208	70629	24660
KOS-H-23-32b	263.5	408.8	11	135.4	25	47.7	71.2	19.4	166.3	30919	295.7	221	67.8	3139	71845	24631
KOS-H-23-33a	136.2	250.9	5	101.2	5.1	21.6	110.3	44.8	407.1	52894	508.7	525.1	108.7	3356	49388	17262
KOS-H-23-33b	161.1	303.4	9.2	124.6	7.9	27.6	139.7	62.2	496.1	74232	713.4	409.2	75.4	2772	39635	14554
KOS-H-23-34a	204.5	205.4	8	146.7	13.6	31.9	92.5	40.1	115.6	40852	532.5	209.8	93.3	3940	41529	21174
KOS-H-23-34b	201.3	202.9	7.9	143.2	12.5	31.1	78.6	27.5	99.3	40262	491.5	224.3	102.9	4027	39815	21835
KOS-H-23-35a	176.5	153.4	10.2	144.4	10.7	30.5	67.3	34.7	138	26411	447.7	186.9	91.5	3861	45226	21481
KOS-H-23-35b	201.1	172.9	10.8	169.1	10.8	25.5	77.6	40.1	128.1	31615	461.5	224.5	126.1	4620	45808	25160
KOS-H-23-36a	208.2	136.7	8.1	142.2	9.7	33.2	79.7	31.2	119.6	43717	507.1	234.9	141.6	5696	18103	24974
KOS-H-23-36b	204.5	134.4	10.2	142.2	12.3	30.3	73.6	32.2	123.2	42247	494.3	263.4	145.5	5691	19914	25444
KOS-H-23-37a	202	184.3	9	125.4	12.6	121	85.5	31.3	123.2	40645	590.1	199.8	94.6	3984	36876	21251
KOS-H-23-37b	200.7	179.7	5	126.6	14	95.9	86.6	44	95.2	40442	598	218.4	99.4	3773	36194	21281
KOS-H-23-38a	228.3	412.4	11.5	134.7	21.2	31.3	66.5	10	191.1	33681	460.1	258.6	66.1	2518	80661	20621
KOS-H-23-38b	219.8	412.4	11.2	132.3	23.4	25	71.3	10	192.8	33216	446.6	239	75.6	2523	80075	20346
KOS-H-23-39a	247.2	377.8	16.7	138.6	25.9	46.1	81.8	33.2	268.3	38093	504.3	294.6	71.4	3025	70375	22641
KOS-H-23-39b	253.5	381.3	14.9	142.7	24.6	49.8	79.9	26.3	245.6	40161	453.7	288.4	81.8	3104	73469	22993
KOS-H-23-40a	274.8	396.8	14.4	168.4	40	85.9	108.1	34.4	321.4	50034	1269.6	278	72	2772	52909	21058
KOS-H-23-40b	258.6	389.3	16.4	162	38.1	76.8	108.9	26.6	325.7	46885	805.3	276.7	76.7	2625	51255	20065
KOS-H-23-41a	194.1	282.2	14	129.8	16.9	35.4	65	19.7	136.9	29836	426.1	135.2	73	2881	75357	25726
KOS-H-23-42a	248	504.1	16.1	155.9	27.4	89	94.8	33.8	162.1	41254	325.9	208.9	60.4	2916	68552	23139
KOS-H-23-43a	252.1	379.6	17.4	150.2	29.9	35.9	88.2	30.7	165.4	36432	317.2	215.3	99.1	3673	63323	27687
KOS-H-23-44a	154.4	173	12.4	129.7	12.5	29	102.8	51.9	179.1	42634	754.7	244.2	86.1	3564	73523	23004
KOS-H-23-45a	259	390	18.1	161.9	30.2	70	100.4	29	157.9	41938	335.4	226.7	110.4	3851	65976	28365
KOS-H-23-46a	167.5	124.1	10	145.8	10.6	32.2	105.3	40	98.7	44069	507.3	207.6	96.3	4148	33577	23123
KOS-R-14-26	219.7	291.6	12.1	151.1	26.1	43.3	89.3	44	153.8	32962	305.9	209.1	92.8	3317	70714	25856
KOS-R-14-27	242.9	445.4	16	136	24.4	43.4	78.5	40	187.4	34189	297.1	257.2	95.5	3587	85340	25556
KOS-R-14-28	217.3	284.5	10	119.7	22.8	31	72.9	42.9	291.5	32886	457.8	339.4	63.1	2575	75230	19364
KOS-R-14-29	214.4	170.9	5	130	14.2	30.9	107.7	63.5	194.7	47613	1190	309.5	132.5	4907	66971	23216
KOS-R-14-30	225.8	360.8	15.3	139	23.4	54.1	81.2	42.2	181.3	32544	328.4	256.5	93.9	3300	68080	25882
KOS-R-14-31	287.8	384.2	13.4	140	28.6	54.1	74.1	31.8	137.2	29670	333.2	387.4	115.3	4005	62738	27414
KOS-R-14-32a	232.3	347	12.6	125.6	20.9	34.2	87.7	32.4	305.1	33550	456.4	446.3	82.6	2715	85970	22553
KOS-R-14-32b	245	338.9	14.1	126.5	24.5	33.7	77.1	27.1	314.4	33781	456.8	447.2	97.6	2924	82596	23948
KOS-R-14-33	253.1	428.3	14.1	133	24.8	63.8	98.3	34.6	182.9	30983	367.3	220.7	80.9	3221	72209	22896
KOS-R-14-34	179.9	323	10.9	97.2	19.7	29.5	85.6	28.1	275.7	27341	552.4	334	68.8	2239	99015	19509
KOS-R-14-35	258.2	385.4	14.6	146	24.3	49.8	102.8	23	181.9	35420	342.9	286.7	92.4	3508	62364	24339
KOS-R-14-36	248.7	388.5	12.5	135.4	22.6	46.2	102.8	34	168.1	31872	344.6	247.7	91.1	3159	65237	21517
KOS-R-14-37	229.8	300.5	9.3	124	24.1	39.8	107.1	32.4	290	34077	476.7	340.4	68.1	2817	87962	22171
KOS-R-14-38	226.5	371.3	13.7	138.3	27.5	40.9	107.2	26.4	170.6	33958	384.8	246.6	65	2835	65324	19936
KOS-R-14-39	223.1	379.5	19.1	124.6	24.2	37.6	99.4	23.1	178.8	29062	305.6	257.1	73	3023	75349	22706
KOS-R-14-40	270.3	409	19.2	146.2	26.8	63.6	101.2	26.4	150.1	28779	327.9	237.1	86.1	3493	69685	26502
KOS-R-14-41	256.3	338.3	20.7	166.2	31.4	749.8	117.2	34.7	200.6	37554	372.3	210.5	86.1	3487	50125	23412
KOS-R-14-42	239.7	329.4	17.6	123.2	19.9	41.3	98.3	32.5	220.7	31740	434.1	260	75.7	2854	51708	18786
KOS-R-14-43	221.2	313.4	15.9	129	21.7	43.5	98.5	23.1	240.7	35311	409.3	241.1	69.3	3047	69018	20417
KOS-R-14-44	227.7	306.9	10.2	130.8	17.6	35.5	70.1	39.3	154.8	30904	540.3	213.2	81.6	3443	85338	24219
KOS-R-14-45	219.8	237.1	17.5	152.8	28.8	107.3	104.9	36.7	194.7	34568	602.8	262.1	97.9	3499	64661	25730
KOS-R-14-46	272.2	351.5	15.5	140.7	21.6	43.1	98.4	38.2	254.6	33888	385	340.6	63.8	3104	79281	22881
KOS-R-14-47	241.2	349.6	13.6	134.4	22.4	40.8	94.9	29.7	232.7	33593	386.1	339.8	70.5	3172	76802	21648
KOS-R-14-48	284.6	381.8	22.5	150.6	30.6	80.3	111.2	29.6	297.6	37416	596.8	355.4	92.6	3153	58818	22175
KOS-R-14-49	280.4	323.4	13.4	144.5	26	48.6	78.3	33.4	204.5	34802	463.6	297.9	91.4	3399	72049	26091
KOS-R-14-50	219	334	12.9	122.4	22.2	38.8	103.2	53	250.7	33209	570.2	434.9	76.8	3266	52167	20187
KOS-R-14-51a	271.8	364.8	18	130.9	20.7	38.7	93.3	30.9	117.7	28983	183.3	239.9	61.3	2892	54656	19447
KOS-R-14-51b	250.9	382	12	138.1	22.3	43.3	69.9	41.4	123.6	29118	241	245.9	82	3557	70251	25834
KOS-R-14-52	261	332.2	15.4	141.5	22	44.1	106.8	40.7	231.6	36010	442.7	348.8	88.6	3237	75552	24117
KOS-R-14-53	246.4	504.3	16.9	109.7	22.1	57	101.2	16.1	184	34351	337.4	280.4	71.1	2887	89018	18136
KOS-R-14-54	228.8	269.5	16.8	91.5	21.6	17	97.1	24.9	473	42531	691.7	524.2	79.4	2728	110137	16332
KOS-R-14-55	235.9	351.4	15.5	121.3	23.9	24.4	104.9	22	190.3	32938	315.1	223	90.4	2550	66010	18434
KOS-R-14-56	209.2	288	13.1	131.7	21.2	34.9	79.4	37	145.6	31172	493.5	240	83.8	3245	85706	24416
KOS-R-14-57	244.9	446.4	21.4	127.7	25.5	30.5	115.8	27.7	234.3	37627	448.1	232	77.1	2496	77346	17696
KOS-R-14-58	248.1	387.6	22.8	138.7	28.1	28.7	100.5	28.2	208.4	34519	369.2	304.9	91.9	3249	69489	22676
KOS-R-14-59	253.7	375.3	15	141.6	27	30	84.1	31.4	183.2	36890	284.7	315.4	108.5	3735	66353	26628
KOS-R-14-60	271.6	440.7	10.2	128.5	24.3	41.5	103.1	35.5	168.9	36460	407.8	245.4	70.7	2657	60759	17968
KOS-R-14-61	236.7	419.3	11.8	69.9	23.5	19.3	94.7	43.7	155.6	29293	315	247.6	67.4	2492	61785	11342
KOS-R-14-62	279.9	438.7	12.1	155.5	24.4	142.5	115.8	32.9	160.1	34217	427.7	238.7	75.8	3364	69778	22906
KOS-R-14-63	255.4	364.3	12.8	149.4	25.1	41.4	108.5	38.3	187.3	34814	368.2	236.4	88.9	3348	62088	23970
KOS-R-14-64	199.9	55.5	12.3	126.1	12.4	25.9	118.8	55.4	165.3	43858	463.8	241.7	109.6	4094	44754	20291
KOS-R-14-65	232.7	346.6	14.1	137	26.1	45.8	105.8	24.7	177.2	33987	352.4	267.9	69.2	2921	64380	21997
KOS-R-14-66	265.6	369.2	13.5	142.9	22.7	44.9	78	28.4	141.4	30376	305.9	260.6	79.5	3706	58209	26883
KOS-R-14-67	223.9	347.6	11.1	127.7	22.3	42.6	75.7	51.4	177.4	33873	297.1	284	78.5	3727	68517	26351
KOS-R-14-68	268.5	365.5	14	150.2	29.5	55.1	92.3	34.5	175.1	36012	330.7	267.1	79.2	3686	64906	26648
KOS-R-14-69	258.7	371.8	9.3	145.4	27.1	54.6	81.9	30.5	181.6	35652	314.2	252	89.4	3568	74294	26765
KOS-R-14-70	246.9	380.8	12.8	122.4	21	57.7	83.6	33	178.6	28601	314.2	300.2	67.9	3495	75246	24854
KOS-R-16-01a	261.4	386.2	5	127.9	24.7	111.4	134.5	59.8	182.1	42299	813.2	131.2	28.2	958	29082	6764
KOS-R-16-01b	221.6	310.8	5	97.8	22.4	54.6	76.7	31.2	175.9	26669	793.9	192	53.4	2162	102792	15447
KOS-R-16-01c	248.3	342.2	5	97.6	22.7	39.4	97.2	36.2	108.6	31739	703.6	91.5	29.2	1103	39016	7747
KOS-R-16-02	228.5	321.4	5	111.3	21.8	51.3	67.6	40.3	98	31626	464	137.9	56.3	2427	63723	15329
KOS-R-16-03	204.5	340.2	5	103.2	18	61.4	71.5	76.5	105	28128	532.3	97	18	1007	29805	6755
KOS-R-16-04	244.6	288.3	5	128.1	23.5	45.4	74.2	38.5	125.3	36209	1878.7	145.9	86.5	3543	64757	21842
KOS-R-16-31	233.1	431.8	6.3	110.9	20.5	31.9	67.4	116.9	94.9	30711	527.7	169	75.1	3106	94587	17550
KOS-R-16-32	233.3	324.8	5	100.2	21.7	34	66.6	50.3	106.8	29173	613.1	168.7	62.7	2525	88432	16885
KOS-R-16-33	215.4	308.2	5	113.9	21.1	51	80.5	41.5	105.4	34080	532.4	124.1	88.2	3129	86732	21402
KOS-R-16-34	166.6	225.2	5	146.1	13	35.1	85	44.9	89.8	36523	403.2	220	71.9	3383	79974	23147
KOS-R-16-35	223.2	419	6	82.1	23.3	124.6	75.3	31.8	110.6	27220	488.3	183.7	37.3	2142	133819	13733
KOS-R-16-36	224.7	328.1	5	111.5	22.7	44.7	80.1	37.8	138.5	35595	722.8	120.5	69.5	2724	72396	16939
KOS-R-16-37	294.7	304.1	5	157.3	26.4	63.9	86.1	39.1	114.9	36365	217.7	223.7	58.1	2933	14026	18155
KOS-R-16-38	251.1	329.9	5	129.2	22.1	45.7	81.1	32.8	94.8	36913	486.4	160.4	67.6	3288	66543	19312
KOS-R-16-39	242	385.4	5	117.6	22.1	50.2	76.2	53.3	122.2	33128	504.7	133.2	69.1	2627	77555	17865
KOS-R-16-40	150.5	263.5	5	146.4	11.5	39.5	80.7	38.9	93	32386	512.8	180.4	62.4	2571	89360	21661
KOS-R-16-41	278.7	313.6	5	163.5	24.5	66.6	81.3	28.7	125	33713	340.2	235.1	62.2	3272	49940	22967
KOS-R-16-42	146.4	243.6	5	158.2	13.1	21.7	75.3	35.6	99.1	31250	522	190.3	75.5	3025	83858	25374
KOS-R-16-43	241.1	364.1	6	90.2	22.1	80.3	70.9	40.1	123.5	33547	683.2	165.8	81.4	3043	92853	13357
KOS-R-16-44	249.1	335.6	5	120	20.4	57.3	80.4	45.6	111.9	32068	530.9	133.1	96.1	3193	79695	20435
KOS-R-16-45	238.5	316.4	5	121.2	23.9	63.2	94.9	38.3	145.5	34830	619.7	97.6	41.1	1729	47094	11435
KOS-R-16-46	283.4	345.8	9.4	163.4	33.1	67.7	100.6	32.7	251.7	51363	517	290.9	77.6	2965	36147	20842
KOS-R-16-47	223.4	235.4	5	168.3	12.1	30.2	84.3	32.4	188.6	36488	427.4	324.5	98.1	3815	69665	25850
KOS-R-16-48	229.7	276.8	5	131.4	22.4	44.5	78.5	33.3	270.7	36930	445.7	329.3	66.6	2843	83487	22501
KOS-R-16-49	237.6	339.5	5	131.7	21.1	66.3	74.7	54.5	130.3	35839	687.1	131.4	87.7	3462	64917	21394
KOS-R-16-50	246.1	245.3	5	164.6	30.4	57	97.5	27.7	154.4	37660	529.6	196.9	71.7	3118	53011	22563
KOS-R-16-51	271.6	302	8.9	130.2	23.9	47.8	85.5	42.7	107.4	33498	689	141	86.4	3532	64848	20973
KOS-R-16-52	259	276.8	5	119.5	22.6	42.4	77.2	39.4	114.4	32324	647.2	207.9	78.3	3513	62531	18781
KOS-R-16-53	284.9	294.2	5	129.7	19.5	48.4	95.4	31	78.1	38655	582.1	206.3	67.2	3498	48520	18756
KOS-R-16-54	258.5	277.2	5	125	19.6	93.5	87.7	37.8	136.5	35333	650.1	139	75.7	3503	61678	18245
KOS-R-16-55	242.5	299.3	5	119.9	17.7	46.9	79.5	39.9	96.1	34878	578	152.8	71	2994	66846	17735
KOS-R-16-56	265.8	322.6	5	123.6	22.2	57.2	79.1	39	102.5	35916	1004.9	136.7	69	2617	63547	16573
KOS-R-16-57	248.9	286.2	5	124.7	20.8	35.4	79.6	29	110.7	36653	590.6	160.5	91.5	3312	74409	20446
KOS-R-16-58	269.6	278.4	5	144.6	17.4	39.6	79.7	29.1	136.5	29197	344	263.6	84	3356	59239	23677
KOS-R-16-59	262.3	378.7	5	157.9	25.4	30.5	74.8	15	226.5	42919	422.9	305.2	72.7	2752	67112	20076
KOS-R-16-60	230	303.7	5	133.2	20	37.5	74.6	28.5	167.3	32201	510.8	188.2	77.5	3136	74835	22986
ATH-H-17-01a	172.3	230.1	7.4	100.2	12.8	34	88.6	35.5	82.1	32168	666.7	101.5	77	2424	84211	16990
ATH-H-17-01b	168.4	237.1	9.3	95.7	15.8	38.1	85.2	42.9	74.4	30897	701	82.4	71.4	2076	69448	14719
ATH-H-17-01c	190.8	223.1	8.6	83	14.3	51.9	127.4	57.4	114.2	32351	732.8	121.9	85.4	2994	88460	19819
ATH-H-17-01d	172.5	271	9.3	89	13.5	51.5	98.2	49.6	92.6	29780	726.9	97.9	73.8	2837	90291	20456
ATH-H-17-02a	192.9	145.2	8.5	88.7	15.2	87.9	107.7	51.5	108.8	33520	758.8	101.1	108.4	3269	87416	18354
ATH-H-17-02b	203.5	149.1	6.9	100.9	18.3	96.6	113.5	42.7	107.2	35912	828.5	155.4	96.1	3763	55486	22552
ATH-H-17-02c	183.2	148	8.5	81.9	15.3	87.6	96.8	46	90.6	29949	752	117.5	90.9	3042	74135	16026
ATH-H-17-02d	193.1	153.3	7.2	107.1	18.4	113.7	146.1	41	117.5	37119	763.4	115	111.2	3701	42240	51013
ATH-H-17-02e	199.5	142.9	11	96.5	20.1	118.4	126.5	41.1	110.7	33598	815.4	136.8	86	2903	72528	16556
ATH-R-25-01a	243.2	586.7	7.9	121.5	18.8	46.8	91.8	52.2	110.5	32218	553.5	196.9	82	3286	55459	20625
ATH-R-25-01b	226.5	714.6	8.3	101.8	15.4	37.6	92.5	39.9	97.8	26477	437.9	53.2	57.1	1967	41600	12325
ATH-R-25-01c	240.2	747.6	8.5	116.2	18.1	41.8	91.6	57.1	104.3	30508	504.5	73.8	85.9	2894	51156	17582
ATH-R-25-01d	244.1	639.2	14	115.1	18.3	41.7	99.6	50.1	127	30058	511	56	67.1	2715	50628	17282
ATH-R-25-02a	226	247.4	9.2	111.2	19.6	100.5	72.8	56.6	107.7	23910	400.7	133.7	53.9	2288	87307	16113
ATH-R-25-02b	254	263.4	13.5	131.9	23.2	55.2	94.1	55.6	137.3	29536	405.9	160.8	63.5	2664	59336	18119
ATH-R-25-02c	229.9	277.8	12	119.7	23.2	158.2	133.4	76.2	126	21074	460.2	108.8	40.6	2132	148405	17315
ATH-R-25-03a	209.5	271.2	8.1	123.8	17.6	68.2	132.3	59.2	114.8	49120	899.5	99.7	118.1	3509	64088	16168
ATH-R-25-03b	222	263.7	8.9	124.1	17.8	88.9	170.8	59.9	128.8	51680	1008.2	114.4	103.9	3795	89897	17232
ATH-R-25-03c	191.4	243.5	10.4	102.7	21.3	85.1	223.1	63.8	90.1	39171	890.7	117.8	73.3	1986	77694	10451
ATH-R-25-04a	239	297.6	12	123.8	19.7	58.4	84.8	47	104.4	31673	533.4	100.2	71.9	2972	47437	18080
ATH-R-25-04b	238.8	378.7	14.2	118.4	17	65.1	90.6	54.1	132.6	28937	526.9	89.6	78.3	3252	64055	20049
ATH-R-25-04c	230.6	304	12.1	116.5	16.8	62.3	91.3	52.3	133.5	29332	534.3	85.2	64.1	2926	58572	17378
ATH-R-25-05a	134.1	192	14.4	96.2	13.1	351.7	134.3	107.2	163.2	29247	1028.3	144.4	86	2682	87005	20405
ATH-R-25-05b	125.1	208.7	13.1	96	11.7	260.3	121.5	80.6	174.5	28912	787.1	167.7	77.8	2620	55345	25860
ATH-R-25-05c	133.5	191.9	11.6	92.9	11.8	369.5	130.5	109.3	164.5	29455	1018.7	171	88	2873	87564	20896
LEV-H-22-01a	205.5	250	5	132.6	26.8	49.5	85.3	31.5	224	38035	662.7	263	78.5	3088	74014	21682
LEV-H-22-01b	199.5	248	8.2	126.7	24.5	43.5	92.5	36.7	228	36183	636.8	233.8	78.7	2905	71957	20758
LEV-H-22-02a	251.8	232.2	5	134.3	19.1	32.3	91.6	44.3	92.8	37436	602.6	174	92.7	3943	50520	20591
LEV-H-22-02b	251.4	230.8	5	128.7	20.6	28.7	94.2	43.7	76.7	37197	617.9	158.8	85.5	4037	50790	20540
LEV-H-22-03a	207	229.7	7.8	127	24.5	47.8	90.1	30.1	242.4	38104	677.2	244.9	75	3146	59191	20081
LEV-H-22-03b	206.1	231.4	8.1	121.1	25.1	50.7	83.6	41.6	249.5	37658	698.9	257.6	69.1	3099	58976	20246
LEV-H-22-04a	253.4	193.6	10.9	119.4	17.2	35.1	92.5	44.8	105.9	35463	478.6	153.9	87.6	3979	33244	18500
LEV-H-22-04b	250.8	189.7	7.7	119.4	18	35	90	34.6	105.1	35198	541.5	148.5	97	3926	33336	18661
LEV-H-22-05a	236.2	317.4	9.2	140.9	22.6	30.2	95.9	41.1	128.8	40922	842.9	160.5	112.1	4438	48701	23824
LEV-H-22-05b	238.7	315.1	11.1	137.5	23.3	30.8	94.4	46.2	145	41000	867.5	152.4	121.5	4380	48631	24120
LEV-H-22-06a	206.1	231.7	11.2	133.3	22.4	44.2	83.1	41.3	262.5	38488	592.2	292.1	79.4	3294	82236	22739
LEV-H-22-06b	207.4	232.8	9.8	133	21.5	45.4	86.7	31.3	268	38651	609.4	307.8	69	3333	82580	23058
LEV-H-22-07a	257.6	321.5	11	134.7	17.3	37.8	116.5	52.6	175.2	47136	688.4	208.8	109.2	4872	48125	20500
LEV-H-22-07b	253.6	318.4	12.1	134.8	19.8	39.1	111.1	60.1	178.7	47442	700	203	108.2	4914	47904	20264
LEV-H-22-08a	247.1	211.3	5	130.3	21.3	49.7	104.4	35.5	73.1	39918	597	110.1	85.9	3641	36312	17587
LEV-H-22-08b	245.3	212.3	11.7	125.7	16.8	45.3	97.6	44.5	86.5	39880	649	129.4	91.9	3594	36438	17658
LEV-H-22-09a	215.7	245.2	14.2	117.6	22.7	39.3	78.8	27.8	317.2	37016	607.1	427	78	3151	84809	20257
LEV-H-22-09b	217.4	239.2	10.7	116.3	23.6	42.4	88.5	24.3	309.7	36758	590.8	409.9	69.4	3134	85439	19983
LEV-H-22-10a	216.7	216.1	11.5	140.3	19.2	39.4	79.6	20.9	223.1	35707	629.1	376.7	83.1	3095	53545	19990
LEV-H-22-10b	223.5	219.4	9.5	136.4	19.9	39.6	80.9	27.6	232.3	35565	605.5	382.3	75.3	3161	53556	20259
LEV-H-22-11a	160.2	184.8	7.3	62.4	13.7	26.4	77.4	27.4	187.3	29992	595.9	273.2	52.8	2932	151875	11167
LEV-H-22-11b	157.6	186	11.6	61.5	10.9	24.8	77	31.7	180.2	29938	589	262.8	69.8	2986	151503	11115
LEV-H-22-12a	290.2	380.9	16.3	132	29.2	56.1	74.4	30.1	155.7	27580	412.7	188.4	68.1	3304	50055	21222
LEV-H-22-12b	290.4	379.3	17.3	133.6	26.5	53.1	71	30.4	154.5	27634	437.5	193.8	73.7	3328	49830	21118
LEV-H-22-13a	226.2	284	13.3	135.9	20.2	31.4	103.4	51.9	152.4	44327	666.6	218.2	94.1	4543	59300	21774
LEV-H-22-13b	231.7	283.3	12.1	136	18.8	30.6	105	45.9	168.2	44360	673.2	228.6	111.3	4575	58883	21763
LEV-H-22-14a	253.1	371.8	12.3	143.3	25.6	33.5	101.1	58.6	122.2	45279	830.4	187	108.8	4997	56442	25599
LEV-H-22-14b	256.5	376.9	13	145	25.5	35.9	102.2	61	132.4	45536	782.3	181.1	117.8	4941	56613	25462
LEV-H-22-15a	280	202.2	8.7	118.2	20.6	35.6	89.3	43.2	122.3	34902	654.8	145.2	102	4406	38087	21442
LEV-H-22-15b	277.9	198.7	11	120.1	19.8	32	90	49.5	109.7	34776	684.4	174.4	106.5	4471	38560	21671
LEV-H-22-16a	256.6	251	15.2	125	21.3	36.2	102.5	37.8	126.8	40252	693.3	167.1	101.9	4089	52872	19988
LEV-H-22-16b	256.8	247.5	15.9	123.5	19.7	33.4	103	45.2	140.7	40149	678.1	152.7	92.3	3990	53186	19624
LEV-H-22-17a	247.3	252.6	14.4	135.2	27.5	49.3	84.2	39.1	172.8	36454	453.3	235.6	112.2	3688	68912	23418
LEV-H-22-17b	247.2	255.6	19.3	134.2	25.9	45.2	89.5	29.4	172.6	36452	488	214.1	96.8	3713	69205	23050
LEV-H-22-18a	210.3	229.1	18.4	116.9	24.3	46.6	92.5	37.6	262.6	37920	790.6	264.6	91.2	3500	74691	21559
LEV-H-22-18b	205.8	224.5	13.4	120	24.6	49.8	91.2	31.5	243.5	37815	752	256.9	92.1	3474	74467	21877
LEV-H-22-19a	253.9	229.5	17.2	125.9	20.9	29.8	103.3	44.5	119.7	36696	708.5	152.6	107.3	4524	38142	21586
LEV-H-22-19b	250.6	229.2	14.9	128.3	19.7	32.1	99.8	48.7	102.3	36516	730.2	153.2	105.2	4368	38306	21726
LEV-H-22-20a	226.5	258.1	15.6	123.4	18.6	27.4	95.9	51.2	169.1	44012	790.6	221.5	118.5	5041	67244	23930
LEV-H-22-20b	229.8	257.3	14	123.1	15.5	30.8	100.7	50.1	171.2	43918	790.4	237.2	106.9	5103	66874	24406
LEV-H-22-21a	272.1	242.2	13.4	123	21.8	31.5	88.8	35.5	93.7	35274	506.1	128.3	82.3	3720	39082	18604
LEV-H-22-21b	268.1	239.4	12.7	121.7	17.4	32.6	92	40.5	96	35225	474.2	137	82.4	3801	39222	18539
LEV-H-22-22a	212.2	229.3	20	138.8	20.5	40.8	86	38.1	230.3	37745	604.5	298.3	98.1	3239	54923	21186
LEV-H-22-22b	214.4	229	18.9	139.2	23.9	38.8	89.5	26.1	240.1	38021	652.4	299.1	84.7	3289	55411	21146
LEV-H-22-23a	221	277.7	15.4	114.2	22.6	35.3	61.8	20.7	159.6	27569	526.9	179.5	70.8	2671	97490	20552
LEV-H-22-23b	224.4	274.7	17.2	109.4	23.9	36.3	66.4	26.5	158.6	27683	576.9	188.9	55.7	2707	97361	20647
LEV-H-22-24a	224.5	297.9	14.5	112.4	20.3	35.7	68.4	27.5	154.5	26024	441	238.4	70	2502	117803	22373
LEV-H-22-24b	227.1	301.7	15.4	112.3	21.4	38.8	72	25.1	158.4	25937	455.9	241.3	64.1	2592	118390	22401
LEV-H-22-25a	230.2	322.6	20.9	147.5	25.7	29.6	86.7	31.1	184	38277	717.1	213.8	96.3	3071	69627	21793
LEV-H-22-25b	227.6	322.5	19.5	147.8	26.1	33.7	89.9	36.6	198.8	38060	730.3	192	90.2	3077	69967	21529
LEV-H-22-26a	226.2	251.4	17.6	139	21.5	45.9	91.7	31.3	270.9	41165	690	288.9	94.1	3448	65571	21146
LEV-H-22-26b	223.5	247.7	17.8	138.2	25.5	44.9	82.8	35.7	279.6	40453	679.3	289.6	99.4	3533	66110	21037
LEV-H-22-27a	264	310	19.2	144	23.8	36.3	99.9	47.6	104.8	41135	776.6	109.5	122.6	4307	43155	22553
LEV-H-22-27b	261.8	313.3	20.6	142.8	28.3	38.2	96.9	44.6	112	41148	802	110.1	114.7	4243	43074	22919
LEV-H-22-28a	250.3	357.4	22.9	147.5	27.7	56.6	87.5	29.9	184.5	37438	380.1	226.4	101.9	3745	53400	25696
LEV-H-22-28b	247.1	359.6	23.3	146.8	29	50.2	85.2	24.6	198.1	37706	396.4	238.4	91.3	3780	53698	25450
LEV-H-22-29a	253.3	287.3	17.7	151	23.8	32.2	95.1	48.5	156.3	45668	787	223.1	119.9	4662	55398	23082
LEV-H-22-29b	253.3	288.8	24.8	148.6	23.9	38	103.8	40.8	147.9	45809	806.6	203.6	119.2	4675	55384	23223
LEV-H-22-30a	231.2	293.9	20	147.9	25.4	43.2	88.8	37.3	189.4	37565	730.4	219.4	74.9	3402	77431	24472
LEV-H-22-30b	231.5	295.9	19.9	146.9	24.6	46.1	95	31.8	186.5	37474	694.6	210.8	106.7	3466	77469	24780
LEV-H-22-31a	259.9	249.3	22	139.8	26.9	47.9	85.5	36.2	149.2	34612	331.9	288	111.1	3975	43080	23160
LEV-H-22-31b	266	252	20.1	143.5	25.2	45.8	86.5	24.2	137.3	34998	347.8	291.1	96.6	3888	43375	23304
LEV-H-22-32a	202.2	257.5	16.8	125.7	25.8	49.4	92.3	34.6	265.3	37761	785	224.5	85.8	3122	83638	21893
LEV-H-22-32b	202.3	254.4	16.6	125.5	23.3	50	89.3	33.7	254.9	37858	750.2	236.7	72.7	3108	83648	22323
LEV-H-22-33a	222.7	262.5	20.3	140.1	23.7	45	87.7	33.3	265.7	42636	619.1	305.7	86.6	3395	72652	21555
LEV-H-22-33b	222.1	262.2	21	139.6	23.5	45.8	96	23.6	275.3	42813	628.4	326.3	75.8	3395	72467	21811
LEV-H-22-34a	244.3	281.7	21.3	139.8	23.3	30.9	94.5	56.8	157.7	39137	566.8	191.7	122.7	4460	55010	22658
LEV-H-22-34b	239.5	280.3	19.8	136.9	26	31.4	93.5	45.5	144.9	38744	592.3	196.8	139.1	4336	55265	22289
LEV-H-22-35a	225	271.1	24	133.9	27.3	45.6	83.7	28.5	193.8	33810	637.2	175.6	78.2	3039	64541	20654
LEV-H-22-35b	226.1	274	25.1	135.2	23.7	40.9	86.8	33.4	177.9	33949	643.8	181.5	65.7	2977	64639	20761
LEV-H-22-36a	214.7	261.4	26.4	135.6	23.5	45.2	96.8	32.4	323.5	40249	1326.1	295.5	64.6	2982	69061	19829
LEV-H-22-36b	213	262.1	25.2	136.6	24.6	47.4	95.3	30.8	335.3	40330	1268.6	261.7	59.5	2994	68865	19863
LEV-H-22-37a	257	240.3	19.2	131.7	26.4	48.3	96.2	27.1	150.1	34687	385.2	187.9	83.5	3226	34427	17945
LEV-H-22-37b	259.9	244.7	18.8	131.7	25.4	49.5	86.2	24.5	135.5	34881	441.8	194.1	84.9	3236	34491	18162
KOS-CLAY01	247.8	389.2	11.3	156.5	30.2	46.7	116.4	45.1	192.8	36473	338.6	270.3	89.3	3618	67791	26617
KOS-CLAY02	242.5	367.2	14.2	144.1	22.1	41.8	112.8	33.6	206.5	35321	385.1	257.1	71.2	2837	85999	23074
KOS-CLAY03	249.5	341.1	17.5	156.5	28.6	49.7	121.1	45.4	179.2	37607	348	224.2	90.1	3581	59058	25669
KOS-CLAY04	257.3	353.4	15.9	161.9	29	51.9	116.9	40.5	159.3	38952	294	259.6	111.1	3745	62881	27392
KOS-CLAY05	245	378.1	23.7	155.6	29.3	65.6	98.6	53.1	208.3	38213	437.7	201.4	102.3	3498	78399	23353
KOS-CLAY06	181.7	217.5	12.9	124.4	19.2	33.8	103.2	80.5	524.6	43801	565.9	350.6	70.6	2333	90465	19748
KOS-CLAY07	249.8	349.9	19.7	151.2	24.6	51.5	141.4	62.9	163.7	36357	362.6	235	90.5	3380	67898	23811
KOS-CLAY08	261.8	292.3	17.9	143.4	24.7	40.8	78.9	35.8	135.8	31173	348.1	204.5	80.5	3238	61352	20902
